# Supplementary material for: South African Abietane Diterpenoids and Their Analogs as Potential Antimalarials: Novel Insights from Hybrid Computational Approaches
Source: PubMed Central journal article supplement (PMC6891524; doi:10.3390/molecules24224036), 2019-11-07
Supplement: molecules-24-04036-s001.pdf [file molecules-24-04036-s001.pdf]

1 *Supplementary Material*

2 **South African abietene diterpenoids and their analogs as potential**  
3 **antimalarials: Novel insights from hybrid computational approaches**

4 Thommas M. Musyoka & Özlem Tastan Bishop\*

5 Research Unit in Bioinformatics (RUBi), Department of Biochemistry and Microbiology,  
6 Rhodes University, Grahamstown, 6140, South Africa

7 **Author e-mail address:**

8 Thommas Mutemi Musyoka: [mutemibiochemistry@gmail.com](mailto:mutemibiochemistry@gmail.com)

9 Özlem Tastan Bishop: [O.TastanBishop@ru.ac.za](mailto:O.TastanBishop@ru.ac.za)

10 **Corresponding author details:**

11 Özlem Tastan Bishop: +27-466-038-072, [O.TastanBishop@ru.ac.za](mailto:O.TastanBishop@ru.ac.za)

12

13

14

15

16

17

18

19

20

21

22

23

24

## 25 **Table of contents**

|    |                                                                                                                           |    |
|----|---------------------------------------------------------------------------------------------------------------------------|----|
| 26 | <b>Figure S1.</b> Binding modes and key residues involved in the stabilization of the different compounds                 |    |
| 27 | inside the active pockets of the different proteins. Residue names are colour coded based on the                          |    |
| 28 | subsite information (Red = S1, Pink= S2, Green = S3, Cyan = S1' and Black = non-subsite). .....                           | 6  |
| 29 | <b>Figure S2:</b> Time dependent evolution of RMSD (A) and RMSF (B) plots of FP-2 during 100 ns                           |    |
| 30 | simulation. Color code: Black = Apo; Blue= Complex and Green = Ligand only. ....                                          | 7  |
| 31 | <b>Figure S3:</b> Time dependent evolution of RMSD (A) and RMSF (B) plots of FP-3 during 100 ns                           |    |
| 32 | simulation. Color code: Black = Apo; Blue= Complex and Green = Ligand only. ....                                          | 8  |
| 33 | <b>Figure S4:</b> Time dependent evolution of RMSD (A) and RMSF (B) plots of VP-2 during 100 ns                           |    |
| 34 | simulation. Color code: Black = Apo; Blue= Complex and Green = Ligand only. ....                                          | 9  |
| 35 | <b>Figure S5:</b> Time dependent evolution of RMSD (A) and RMSF (B) plots of VP-3 during 100 ns                           |    |
| 36 | simulation. Color code: Black = Apo; Blue= Complex and Green = Ligand only. ....                                          | 10 |
| 37 | <b>Figure S6:</b> Time dependent evolution of RMSD (A) and RMSF (B) plots of KP-2 during 100 ns                           |    |
| 38 | simulation. Color code: Black = Apo; Blue= Complex and Green = Ligand only. ....                                          | 11 |
| 39 | <b>Figure S7:</b> Time dependent evolution of RMSD (A) and RMSF (B) plots of KP-3 during 100 ns                           |    |
| 40 | simulation. Color code: Black = Apo; Blue= Complex and Green = Ligand only. ....                                          | 12 |
| 41 | <b>Figure S8:</b> Time dependent evolution of RMSD (A) and RMSF (B) plots of BP-2 during 100 ns                           |    |
| 42 | simulation. Color code: Black = Apo; Blue= Complex and Green = Ligand only. ....                                          | 13 |
| 43 | <b>Figure S9:</b> Time dependent evolution of RMSD (A) and RMSF (B) plots of CP-2 during 100 ns                           |    |
| 44 | simulation. Color code: Black = Apo; Blue= Complex and Green = Ligand only. ....                                          | 14 |
| 45 | <b>Figure S10:</b> Time dependent evolution of RMSD (A) and RMSF (B) plots of YP-2 during 100 ns                          |    |
| 46 | simulation. Color code: Black = Apo; Blue= Complex and Green = Ligand only. ....                                          | 15 |
| 47 | <b>Figure S11:</b> Time dependent evolution of RMSD (A) and RMSF (B) plots of Cat-K during 100 ns                         |    |
| 48 | simulation. Color code: Black = Apo; Blue= Complex and Green = Ligand only. ....                                          | 16 |
| 49 | <b>Figure S12:</b> Time dependent evolution of RMSD (A) and RMSF (B) plots of Cat-L during 100 ns                         |    |
| 50 | simulation. Color code: Black = Apo; Blue= Complex and Green = Ligand only. ....                                          | 17 |
| 51 | <b>Figure S13:</b> Time dependent evolution of RMSD (A) and RMSF (B) plots of Cat-S during 100 ns                         |    |
| 52 | simulation. Color code: Black = Apo; Blue= Complex and Green = Ligand only. ....                                          | 18 |
| 53 | <b>Figure S14.</b> $C\alpha$ protein backbone RMSD distribution histogram plots for apo and ligand bound                  |    |
| 54 | protein systems. The effect of ligand binding on the global conformational variation for each protein                     |    |
| 55 | can be determined by comparing the mean ( $\mu$ ) of the complex (dashed red line) and that of the                        |    |
| 56 | corresponding apo system. $\sigma$ denotes the conformational distribution standard deviation over the last               |    |
| 57 | 70 ns of simulation. ....                                                                                                 | 19 |
| 58 | <b>Figure S15.</b> Ligand backbone RMSD distribution plots for the various ligands bound to plasmodial                    |    |
| 59 | and human proteins. The dashed red line indicates the RMSD mean ( $\mu$ ) per each ligand while $\sigma$                  |    |
| 60 | denotes the standard deviation during the last 70 ns of simulation. ....                                                  | 20 |
| 61 | <b>Figure S16.</b> The effect of ligand binding on the fluctuations of each protein residue as determined by              |    |
| 62 | Root Mean Square Fluctuations (RMSF). Marked in red wedges are the catalytic triad (Cys-His-Asn)                          |    |
| 63 | residues of each protein. The colour bars at the top correspond to the protein loops as shown on the                      |    |
| 64 | right. ....                                                                                                               | 21 |
| 65 | <b>Figure S17:</b> Dynamic residue network analysis ( <i>betweenness of centrality</i> and <i>average shortest path</i> ) |    |
| 66 | of FP-2 in the presence of different ligands. Color code: Black = Apo; Red= Complex. The location of                      |    |

|     |                                                                                                                           |    |
|-----|---------------------------------------------------------------------------------------------------------------------------|----|
| 67  | residues with significant high <i>average BC</i> and low <i>average L</i> score are shown in red and blue on the          |    |
| 68  | protein structure. ....                                                                                                   | 22 |
| 69  | <b>Figure S18:</b> Dynamic residue network analysis ( <i>betweenness of centrality</i> and <i>average shortest path</i> ) |    |
| 70  | of FP-3 in the presence of different ligands. Color code: Black = Apo; Red= Complex. The location of                      |    |
| 71  | residues with significant high <i>average BC</i> and low <i>average L</i> score are shown in red and blue on the          |    |
| 72  | protein structure. ....                                                                                                   | 23 |
| 73  | <b>Figure S19:</b> Dynamic residue network analysis ( <i>betweenness of centrality</i> and <i>average shortest path</i> ) |    |
| 74  | of VP-2 in the presence of different ligands. Color code: Black = Apo; Red= Complex. The location                         |    |
| 75  | of residues with significant high <i>average BC</i> and low <i>average L</i> score are shown in red and blue on           |    |
| 76  | the protein structure. ....                                                                                               | 24 |
| 77  | <b>Figure S20:</b> Dynamic residue network analysis ( <i>betweenness of centrality</i> and <i>average shortest path</i> ) |    |
| 78  | of VP-3 in the presence of different ligands. Color code: Black = Apo; Red= Complex. The location                         |    |
| 79  | of residues with significant high <i>average BC</i> and low <i>average L</i> score are shown in red and blue on           |    |
| 80  | the protein structure. ....                                                                                               | 25 |
| 81  | <b>Figure S21:</b> Dynamic residue network analysis ( <i>betweenness of centrality</i> and <i>average shortest path</i> ) |    |
| 82  | of KP-2 in the presence of different ligands. Color code: Black = Apo; Red= Complex. The location                         |    |
| 83  | of residues with significant high <i>average BC</i> and low <i>average L</i> score are shown in red and blue on           |    |
| 84  | the protein structure. ....                                                                                               | 26 |
| 85  | <b>Figure S22:</b> Dynamic residue network analysis ( <i>betweenness of centrality</i> and <i>average shortest path</i> ) |    |
| 86  | of KP-3 in the presence of different ligands. Color code: Black = Apo; Red= Complex. The location                         |    |
| 87  | of residues with significant high <i>average BC</i> and low <i>average L</i> score are shown in red and blue on           |    |
| 88  | the protein structure. ....                                                                                               | 27 |
| 89  | <b>Figure S23:</b> Dynamic residue network analysis ( <i>betweenness of centrality</i> and <i>average shortest path</i> ) |    |
| 90  | of BP-2 in the presence of different ligands. Color code: Black = Apo; Red= Complex. The location                         |    |
| 91  | of residues with significant high <i>average BC</i> and low <i>average L</i> score are shown in red and blue on           |    |
| 92  | the protein structure. ....                                                                                               | 28 |
| 93  | <b>Figure S24:</b> Dynamic residue network analysis ( <i>betweenness of centrality</i> and <i>average shortest path</i> ) |    |
| 94  | of CP-2 in the presence of different ligands. Color code: Black = Apo; Red= Complex. The location                         |    |
| 95  | of residues with significant high <i>average BC</i> and low <i>average L</i> score are shown in red and blue on           |    |
| 96  | the protein structure. ....                                                                                               | 29 |
| 97  | <b>Figure S25:</b> Dynamic residue network analysis ( <i>betweenness of centrality</i> and <i>average shortest path</i> ) |    |
| 98  | of YP-2 in the presence of different ligands. Color code: Black = Apo; Red= Complex. The location                         |    |
| 99  | of residues with significant high <i>average BC</i> and low <i>average L</i> score are shown in red and blue on           |    |
| 100 | the protein structure. ....                                                                                               | 30 |
| 101 | <b>Figure S26:</b> Dynamic residue network analysis ( <i>betweenness of centrality</i> and <i>average shortest path</i> ) |    |
| 102 | of Cat-K in the presence of different ligands. Color code: Black = Apo; Red= Complex. The location                        |    |
| 103 | of residues with significant high <i>average BC</i> and low <i>average L</i> score are shown in red and blue on           |    |
| 104 | the protein structure. ....                                                                                               | 31 |
| 105 | <b>Figure S27:</b> Dynamic residue network analysis ( <i>betweenness of centrality</i> and <i>average shortest path</i> ) |    |
| 106 | of Cat-L in the presence of different ligands. Color code: Black = Apo; Red= Complex. The location                        |    |
| 107 | of residues with significant high <i>average BC</i> and low <i>average L</i> score are shown in red and blue on           |    |
| 108 | the protein structure. ....                                                                                               | 32 |
| 109 | <b>Figure S28:</b> Dynamic residue network analysis ( <i>betweenness of centrality</i> and <i>average shortest path</i> ) |    |
| 110 | of Cat-S in the presence of different ligands. Color code: Black = Apo; Red= Complex. The location                        |    |
| 111 | of residues with significant high <i>average BC</i> and low <i>average L</i> score are shown in red and blue on           |    |
| 112 | the protein structure. ....                                                                                               | 33 |

|     |                                                                                                                          |    |
|-----|--------------------------------------------------------------------------------------------------------------------------|----|
| 113 | <b>Figure S29.</b> Effect of ligand binding on <i>BC</i> (A) and <i>L</i> (B) using the apo structures as the reference. |    |
| 114 | Shaded are regions of the protein that showed significant changes (one and half times away from the                      |    |
| 115 | means of the ligand bound systems) in <i>BC</i> (red) and <i>L</i> (blue).                                               | 34 |
| 116 | <b>Figure S30:</b> Plots showing FP-2 residues with significant changes in <i>average a) BC</i> and <i>B) L</i> upon     |    |
| 117 | ligand binding.                                                                                                          | 35 |
| 118 | <b>Figure S31:</b> Plots showing FP-3 residues with significant changes in <i>average a) BC</i> and <i>B) L</i> upon     |    |
| 119 | ligand binding.                                                                                                          | 36 |
| 120 | <b>Figure S32:</b> Plots showing VP-2 residues with significant changes in <i>average a) BC</i> and <i>B) L</i> upon     |    |
| 121 | ligand binding.                                                                                                          | 37 |
| 122 | <b>Figure S33:</b> Plots showing VP-3 residues with significant changes in <i>average a) BC</i> and <i>B) L</i> upon     |    |
| 123 | ligand binding.                                                                                                          | 38 |
| 124 | <b>Figure S34:</b> Plots showing KP-2 residues with significant changes in <i>average a) BC</i> and <i>B) L</i> upon     |    |
| 125 | ligand binding.                                                                                                          | 39 |
| 126 | <b>Figure S35:</b> Plots showing KP-3 residues with significant changes in <i>average a) BC</i> and <i>B) L</i> upon     |    |
| 127 | ligand binding.                                                                                                          | 40 |
| 128 | <b>Figure S36:</b> Plots showing BP-2 residues with significant changes in <i>average a) BC</i> and <i>B) L</i> upon     |    |
| 129 | ligand binding.                                                                                                          | 41 |
| 130 | <b>Figure S37:</b> Plots showing CP-2 residues with significant changes in <i>average a) BC</i> and <i>B) L</i> upon     |    |
| 131 | ligand binding.                                                                                                          | 42 |
| 132 | <b>Figure S38:</b> Plots showing YP-2 residues with significant changes in <i>average a) BC</i> and <i>B) L</i> upon     |    |
| 133 | ligand binding.                                                                                                          | 43 |
| 134 | <b>Figure S39:</b> Plots showing Cat-K residues with significant changes in <i>average a) BC</i> and <i>B) L</i> upon    |    |
| 135 | ligand binding.                                                                                                          | 44 |
| 136 | <b>Figure S40:</b> Plots showing Cat-L residues with significant changes in <i>average a) BC</i> and <i>B) L</i> upon    |    |
| 137 | ligand binding.                                                                                                          | 45 |
| 138 | <b>Figure S41:</b> Plots showing Cat-S residues with significant changes in <i>average a) BC</i> and <i>B) L</i> upon    |    |
| 139 | ligand binding.                                                                                                          | 46 |
| 140 | <b>Table S1.</b> Position of the catalytic domain of all proteins used and the corresponding domain                      |    |
| 141 | numbering.                                                                                                               | 47 |
| 142 | <b>Table S2.</b> Residue interaction fingerprint between the different proteins and ligands. Shown in red,               |    |
| 143 | pink, green and cyan are residues interacting with S1, S2, S3 and S1' respectively. In black represent                   |    |
| 144 | non-subsite residues. Residues are numbered according to the catalytic domain ( <b>Table S1</b> ).                       | 48 |
| 145 | <b>Table S3.</b> RMSD distribution statistics. Apo and ligand bound RMSD means were compared using                       |    |
| 146 | the z-test with $\alpha = 0.05$ and a $H_0$ of $\mu_1 - \mu_2 = 0$ . The two-sample KS-test was used to compare the      |    |
| 147 | shapes of the distributions between the apo and ligand bound systems $\mu = \text{Mean}$ , $\sigma = \text{Standard}$    |    |
| 148 | deviation and $\sigma^2 = \text{Variance}$ .                                                                             | 52 |
| 149 | <b>Table S4:</b> Ligand-residue interaction fingerprint at different MD simulation time steps. VDR and                   |    |
| 150 | HBR indicate the number of residues involved in van der Waals (hydrophobic) interactions and those                       |    |
| 151 | involved in hydrogen (HBR) bonding respectively. Residue are numbered based on the catalytic                             |    |
| 152 | domain length of each protein ( <b>Table S1</b> ).                                                                       | 57 |
| 153 | <b>Table S5:</b> Protein-ligand complex binding free energy terms in kJ/mol as determined by molecular                   |    |
| 154 | mechanics Poisson-Boltzmann surface area (MM-PBSA) analysis. vdW=van der Waals forces,                                   |    |

|     |                                                                                                                       |    |
|-----|-----------------------------------------------------------------------------------------------------------------------|----|
| 155 | ele=electrostatics, PB=polar solvation energy, SASA=Soluble Accessible Surface Area, bind=binding                     |    |
| 156 | free energy. ....                                                                                                     | 62 |
| 157 | <b>Table S6:</b> Subsite residue composition information (details and position). Residue numbering based              |    |
| 158 | on the catalytic domain length of individual proteins as indicated in <b>Table S1</b> . ....                          | 64 |
| 159 | <b>Table S7.</b> Residues with significant $\Delta BC$ (A) and $\Delta L$ (B). Apo systems were used as the reference |    |
| 160 | structures. A cut off value of one and half times standard deviation of the means of the difference with              |    |
| 161 | the various ligands used to define residues with significant changes in <i>average BC</i> and <i>average L</i> .      |    |
| 162 | Residue numbering based on the catalytic domain length indicated in <b>Table S1</b> . ....                            | 65 |
| 163 | <b>Table S8.</b> Association of the various protein dynamic residue network metrics for proteins bound to             |    |
| 164 | different compounds as determined by Pearson's correlation coefficient. ....                                          | 67 |
| 165 | <b>Table S9.</b> Active compounds against FP-2 and decoys from DUD-E used for docking protocol                        |    |
| 166 | validation. ....                                                                                                      | 69 |
| 167 |                                                                                                                       |    |
| 168 |                                                                                                                       |    |
| 169 |                                                                                                                       |    |
| 170 |                                                                                                                       |    |

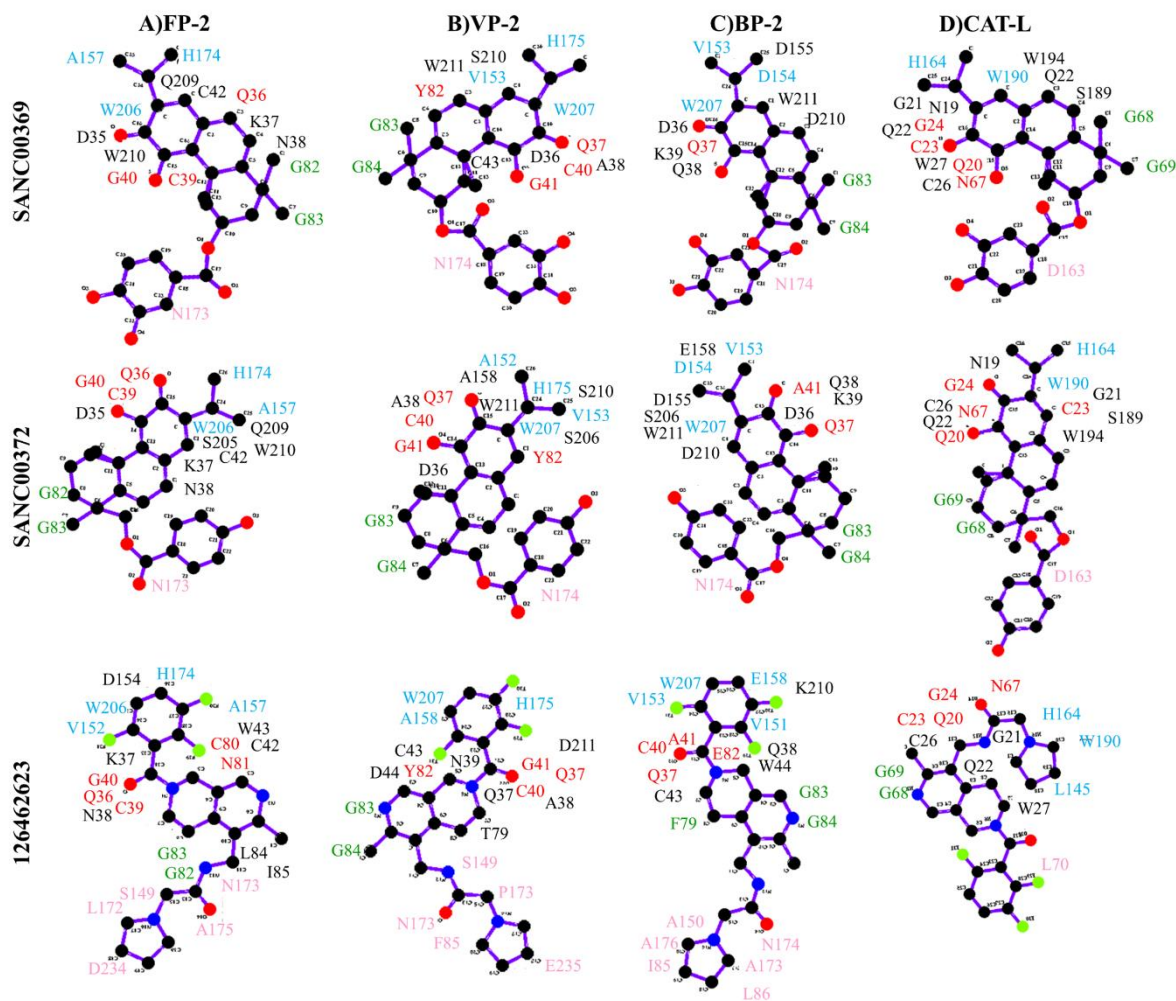

171

172 **Figure S1.** Binding modes and key residues involved in the stabilization of the different  
 173 compounds inside the active pockets of the different proteins. Residue names are colour coded  
 174 based on the subsite information (Red = S1, Pink= S2, Green = S3, Cyan = S1' and Black =  
 175 non-subsite).

176

177

178

179

180

181

182

183

184

185

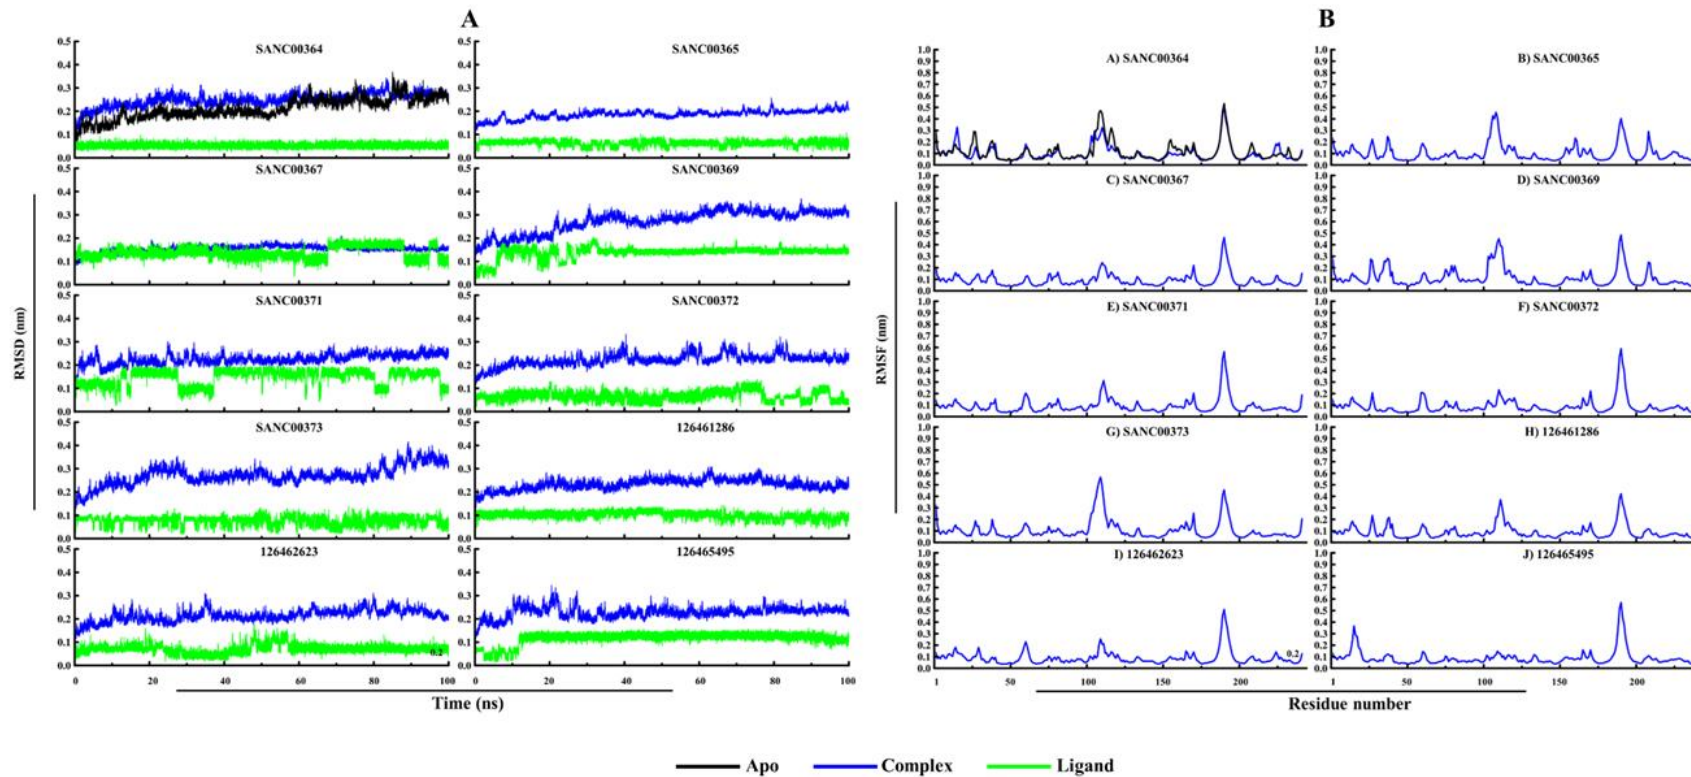

186

187 **Figure S2:** Time dependent evolution of RMSD (A) and RMSF (B) plots of FP-2 during 100 ns simulation. Color code: Black = Apo; Blue=  
 188 Complex and Green = Ligand only.

189

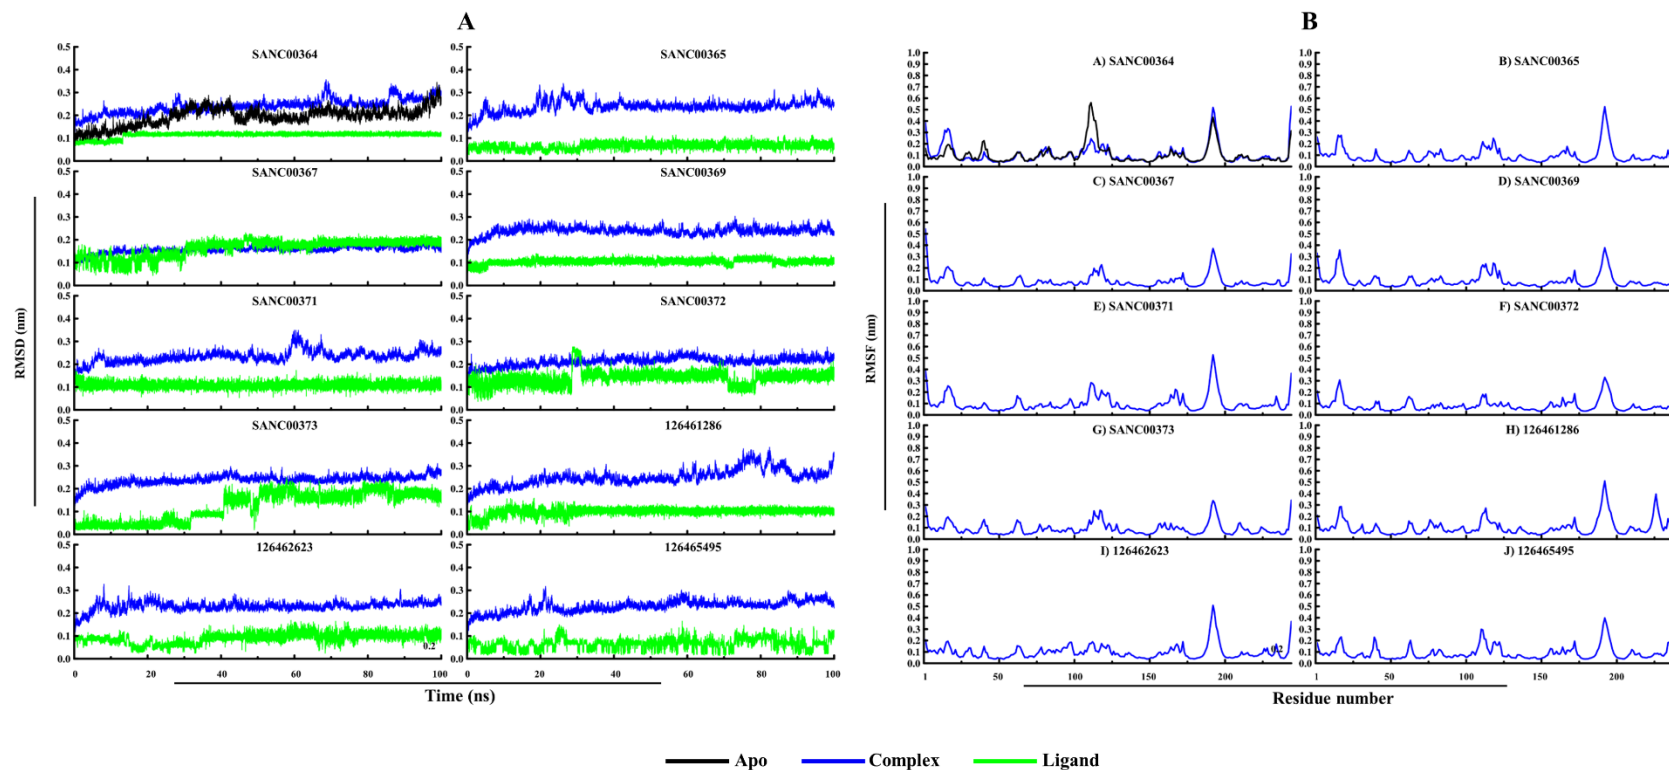

190

191 **Figure S3:** Time dependent evolution of RMSD (A) and RMSF (B) plots of FP-3 during 100 ns simulation. Color code: Black = Apo; Blue=  
192 Complex and Green = Ligand only.

193



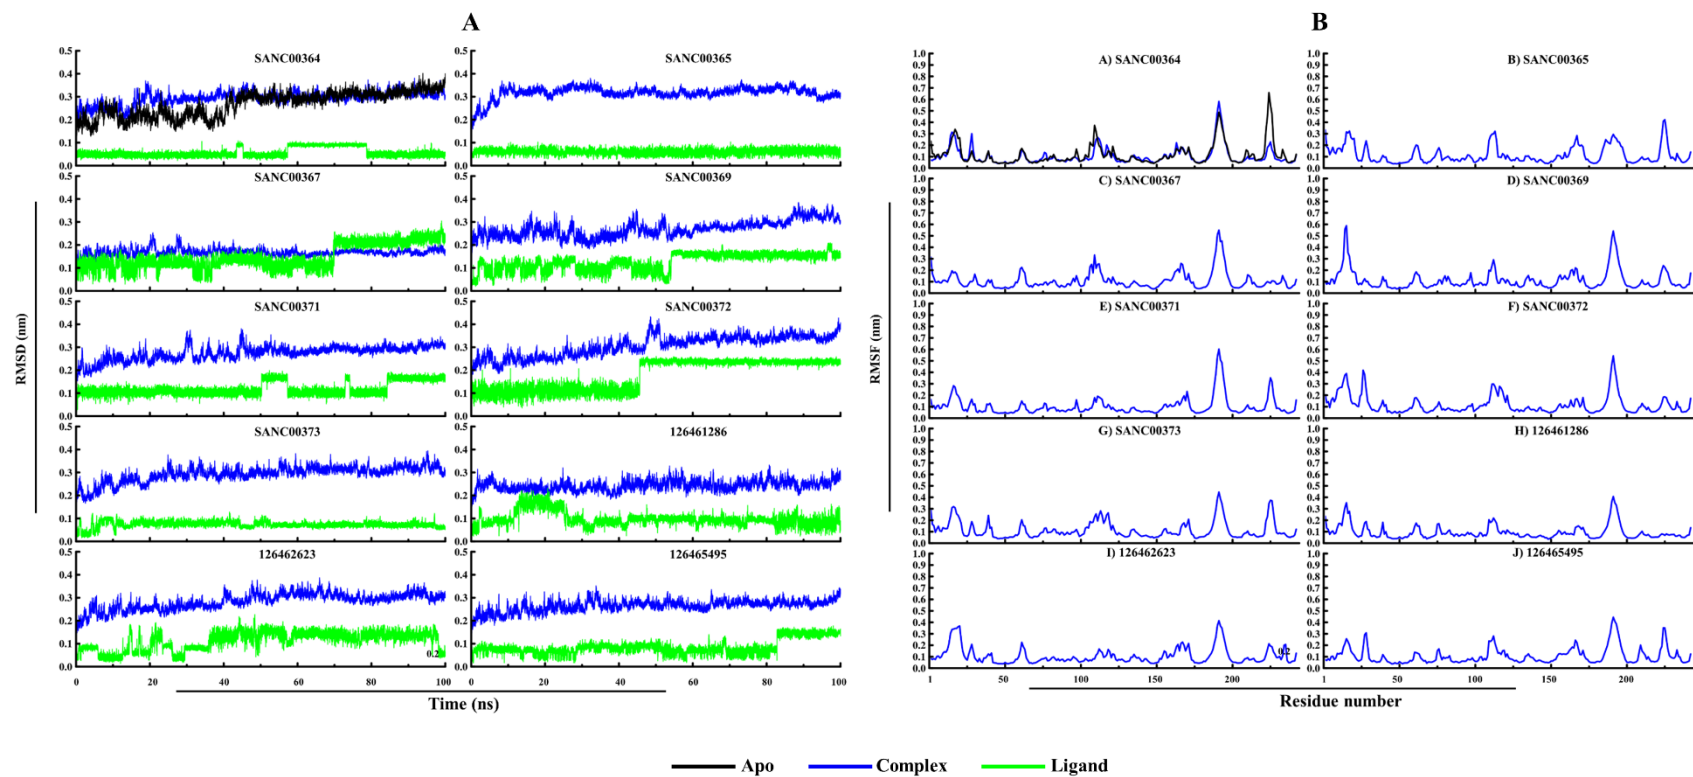

194

195 **Figure S4:** Time dependent evolution of RMSD (A) and RMSF (B) plots of VP-2 during 100 ns simulation. Color code: Black = Apo; Blue=  
 196 Complex and Green = Ligand only.

197

198

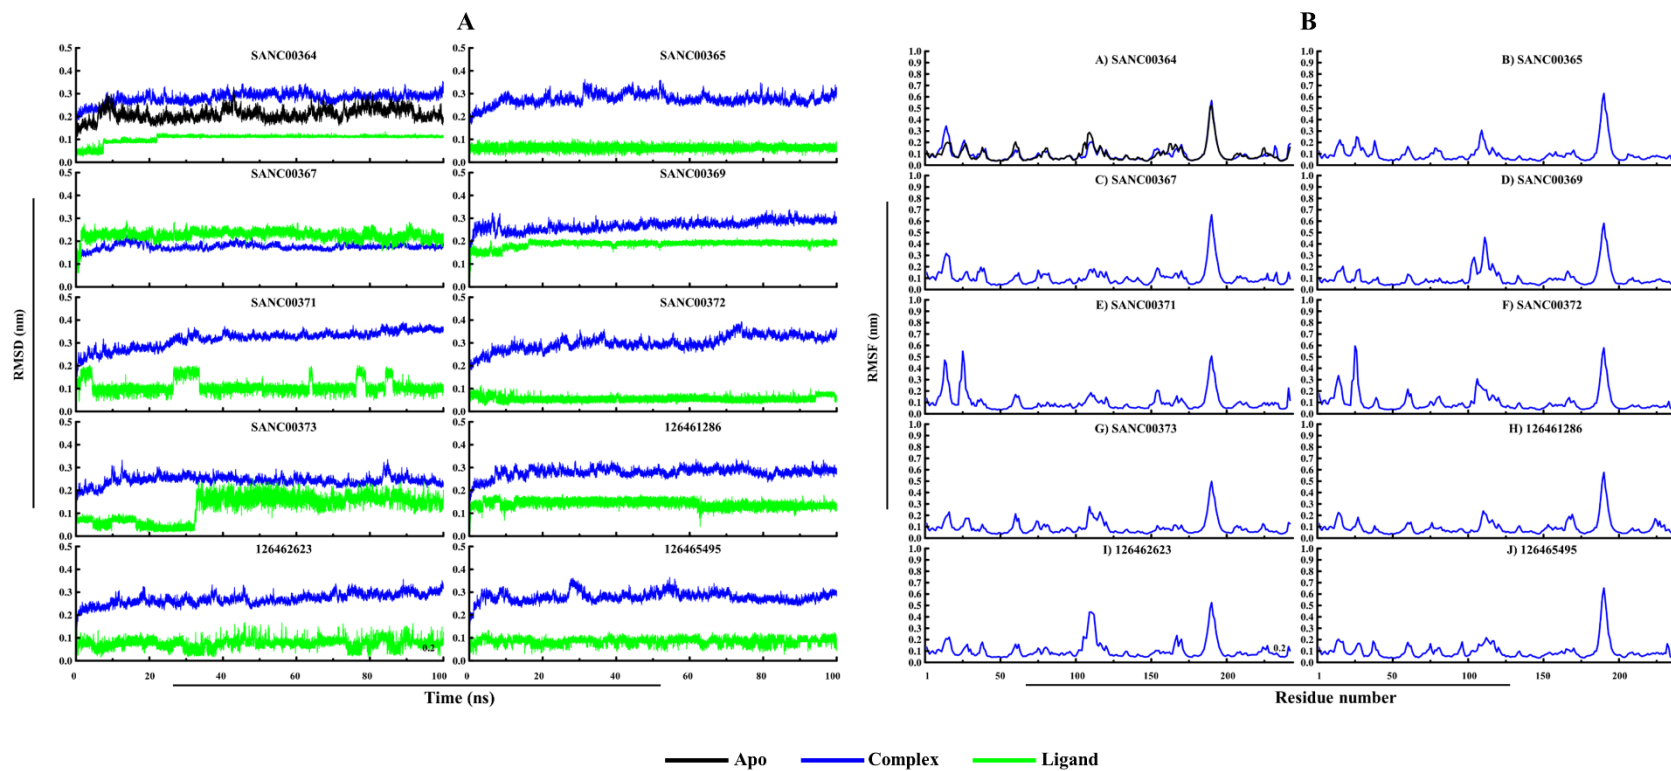

199

200 **Figure S5:** Time dependent evolution of RMSD (A) and RMSF (B) plots of VP-3 during 100 ns simulation. Color code: Black = Apo; Blue=  
 201 Complex and Green = Ligand only.

202

203

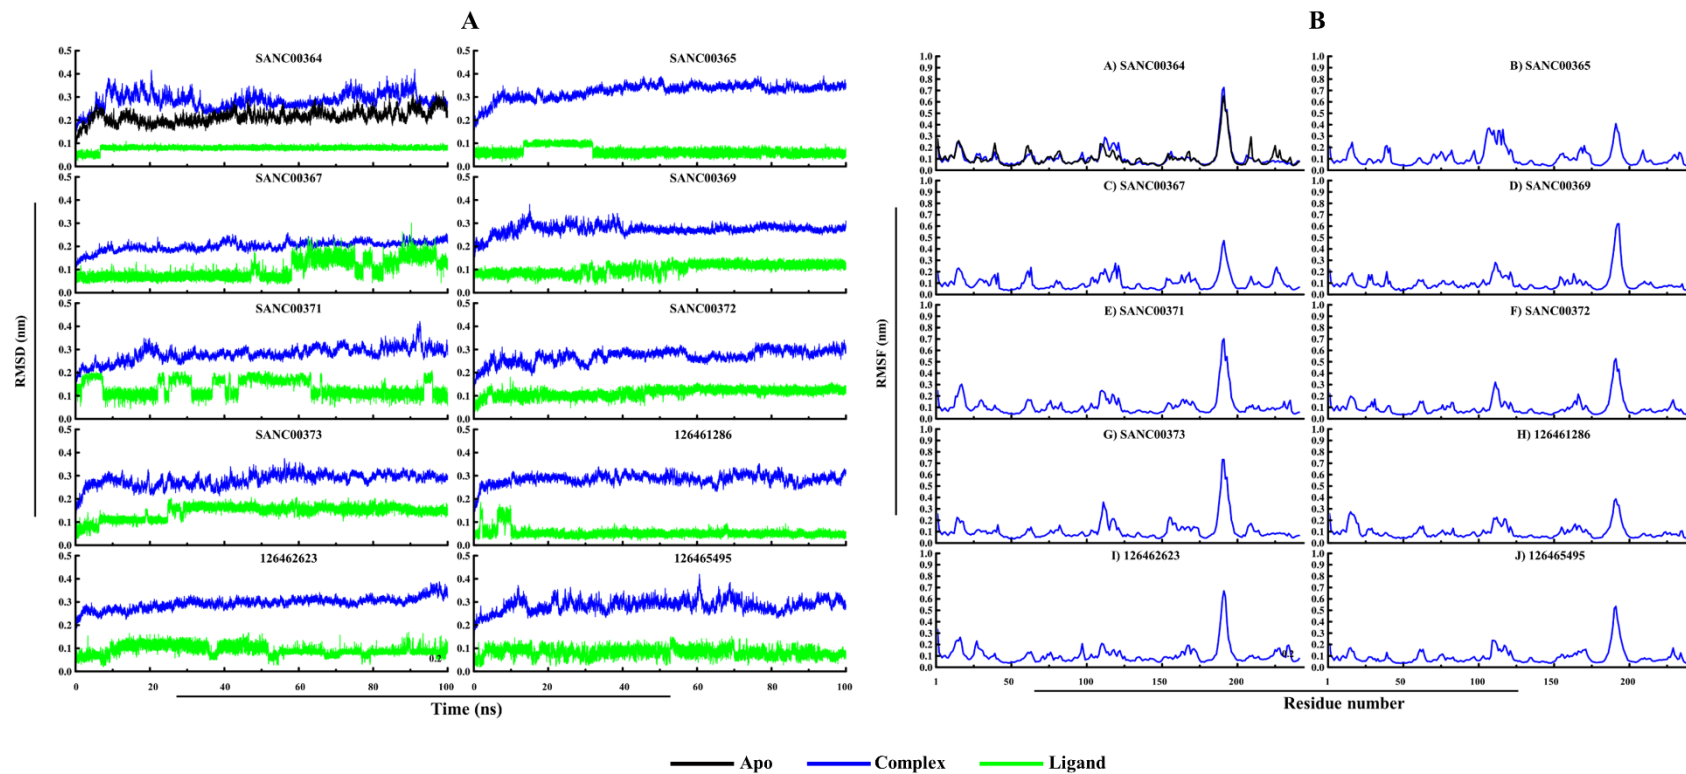

204

205 **Figure S6:** Time dependent evolution of RMSD (A) and RMSF (B) plots of KP-2 during 100 ns simulation. Color code: Black = Apo; Blue=  
 206 Complex and Green = Ligand only.

207

208

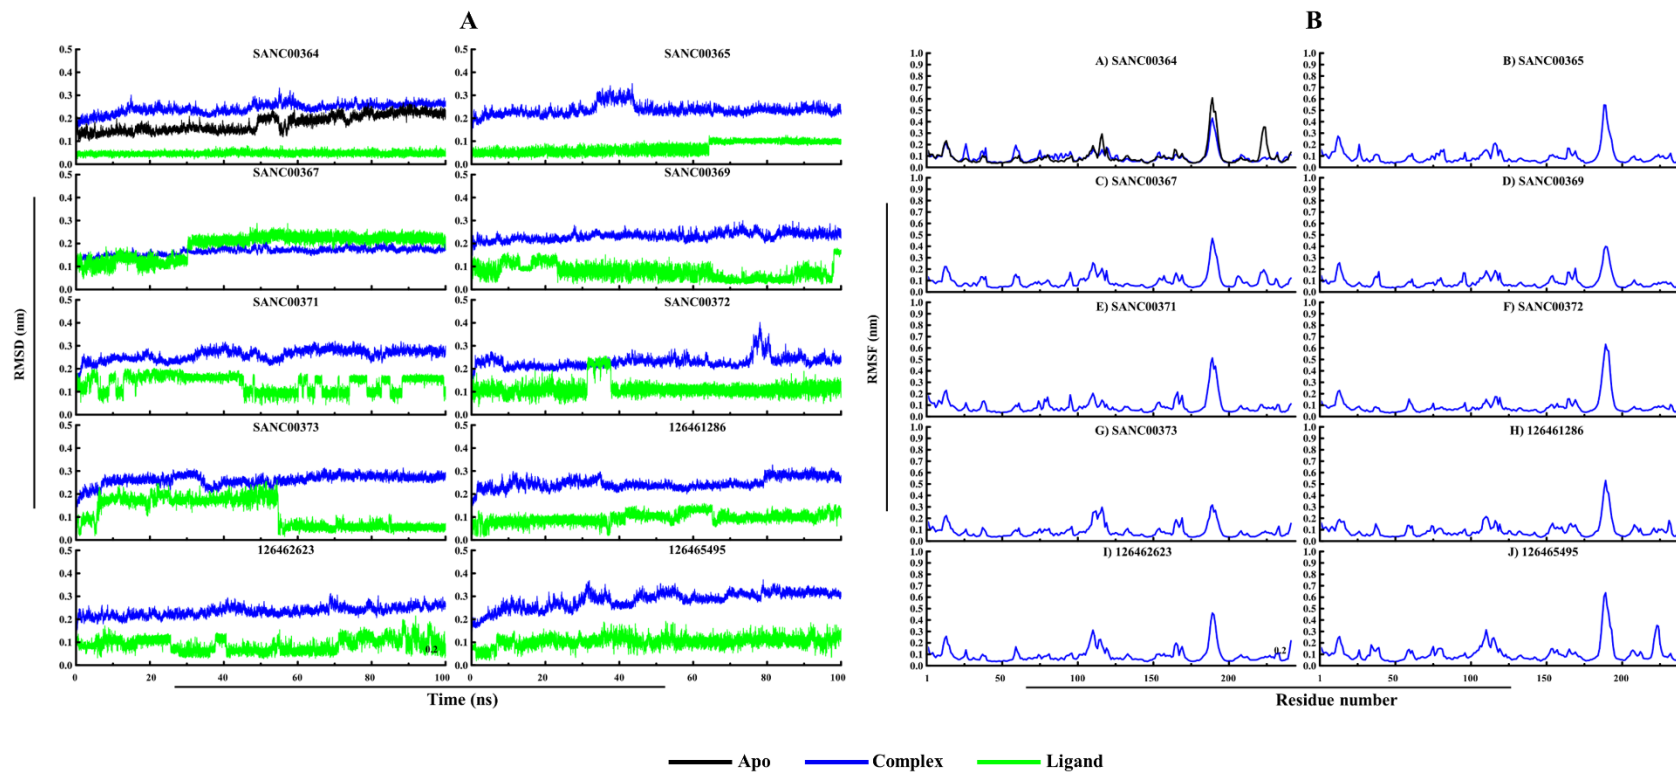

209

210 **Figure S7:** Time dependent evolution of RMSD (A) and RMSF (B) plots of KP-3 during 100 ns simulation. Color code: Black = Apo; Blue=  
 211 Complex and Green = Ligand only.

212

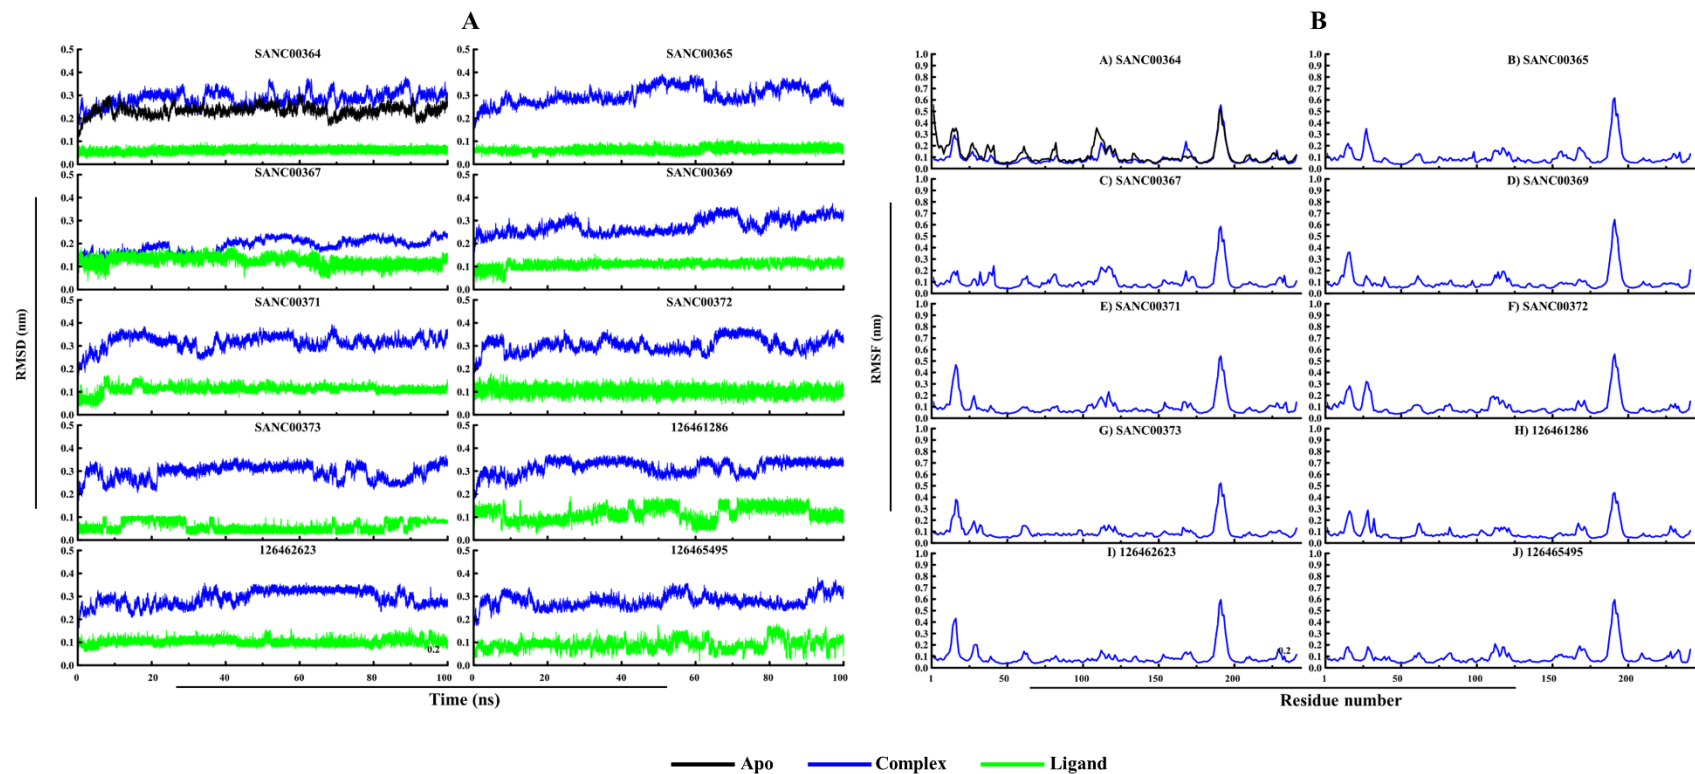

213

214 **Figure S8:** Time dependent evolution of RMSD (A) and RMSF (B) plots of BP-2 during 100 ns simulation. Color code: Black = Apo; Blue=  
215 Complex and Green = Ligand only.

216

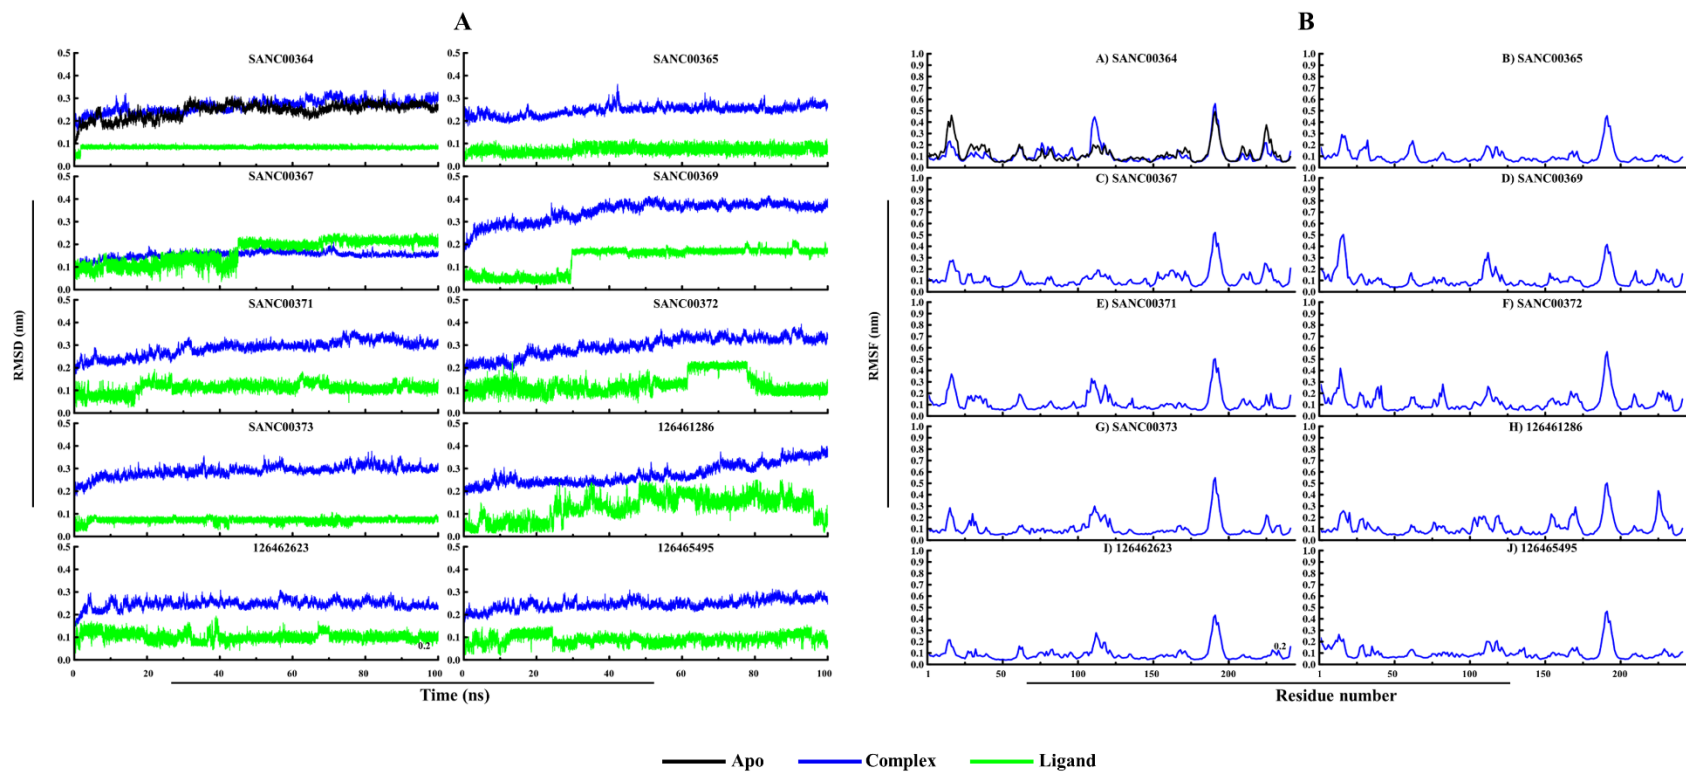

217

218 **Figure S9:** Time dependent evolution of RMSD (A) and RMSF (B) plots of CP-2 during 100 ns simulation. Color code: Black = Apo; Blue=  
 219 Complex and Green = Ligand only.

220

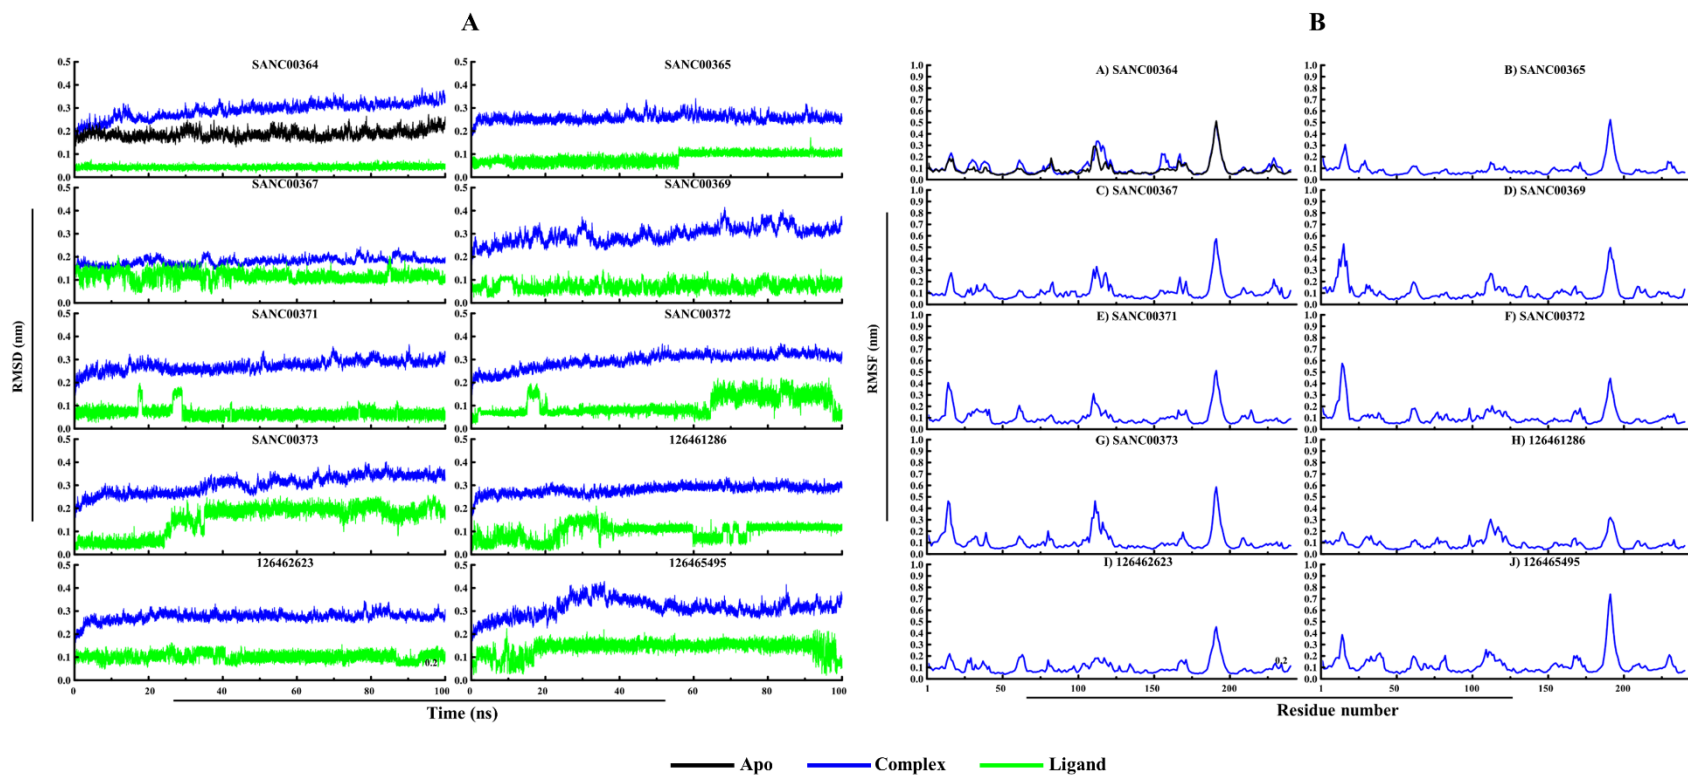

221

222 **Figure S10:** Time dependent evolution of RMSD (A) and RMSF (B) plots of YP-2 during 100 ns simulation. Color code: Black = Apo; Blue=  
223 Complex and Green = Ligand only.

224

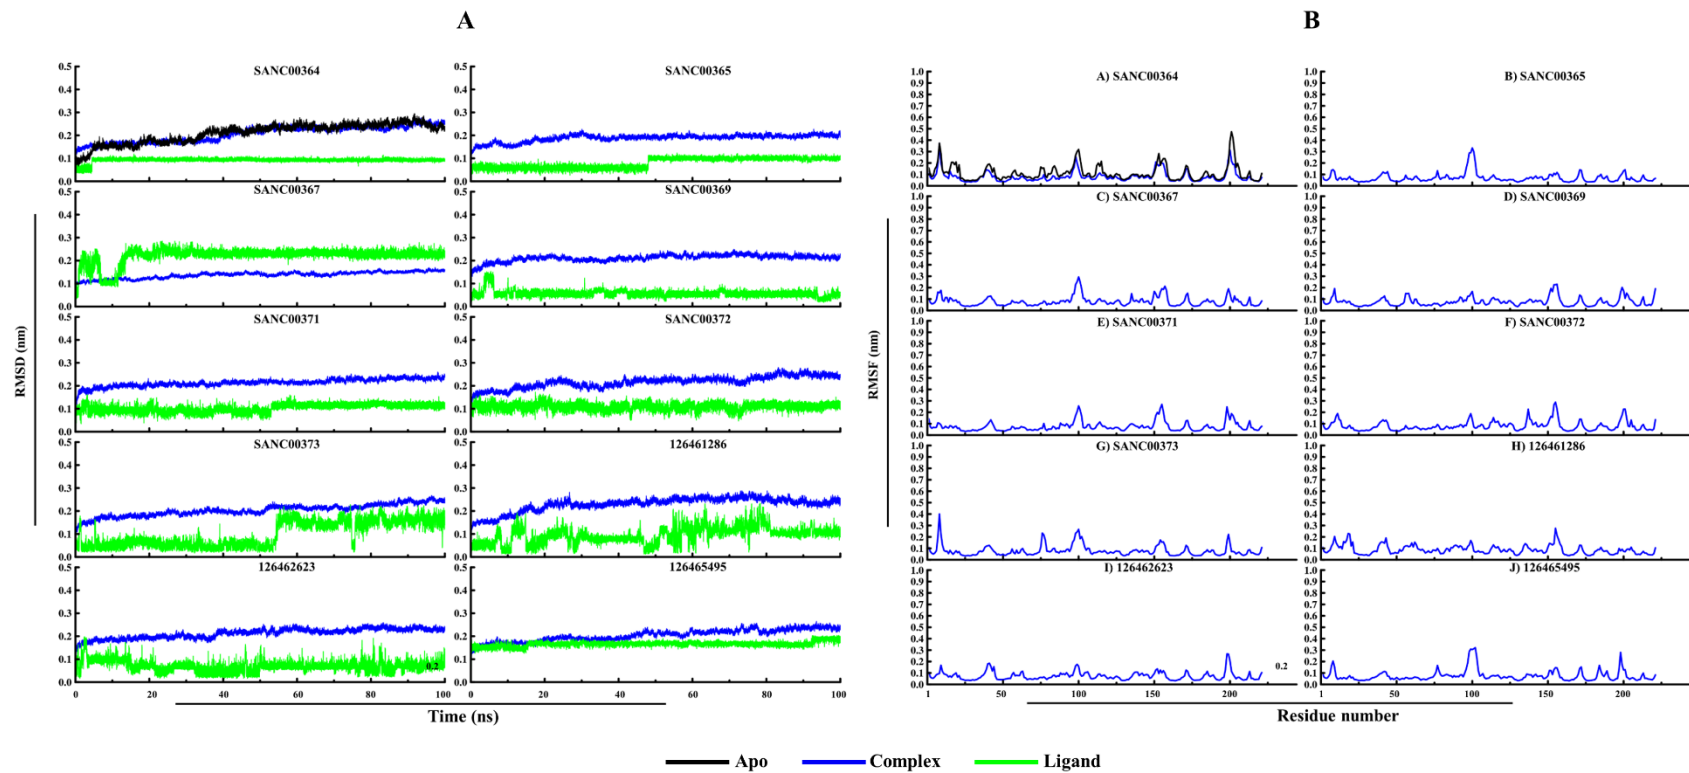

225

226 **Figure S11:** Time dependent evolution of RMSD (A) and RMSF (B) plots of Cat-K during 100 ns simulation. Color code: Black = Apo; Blue=  
227 Complex and Green = Ligand only.

228



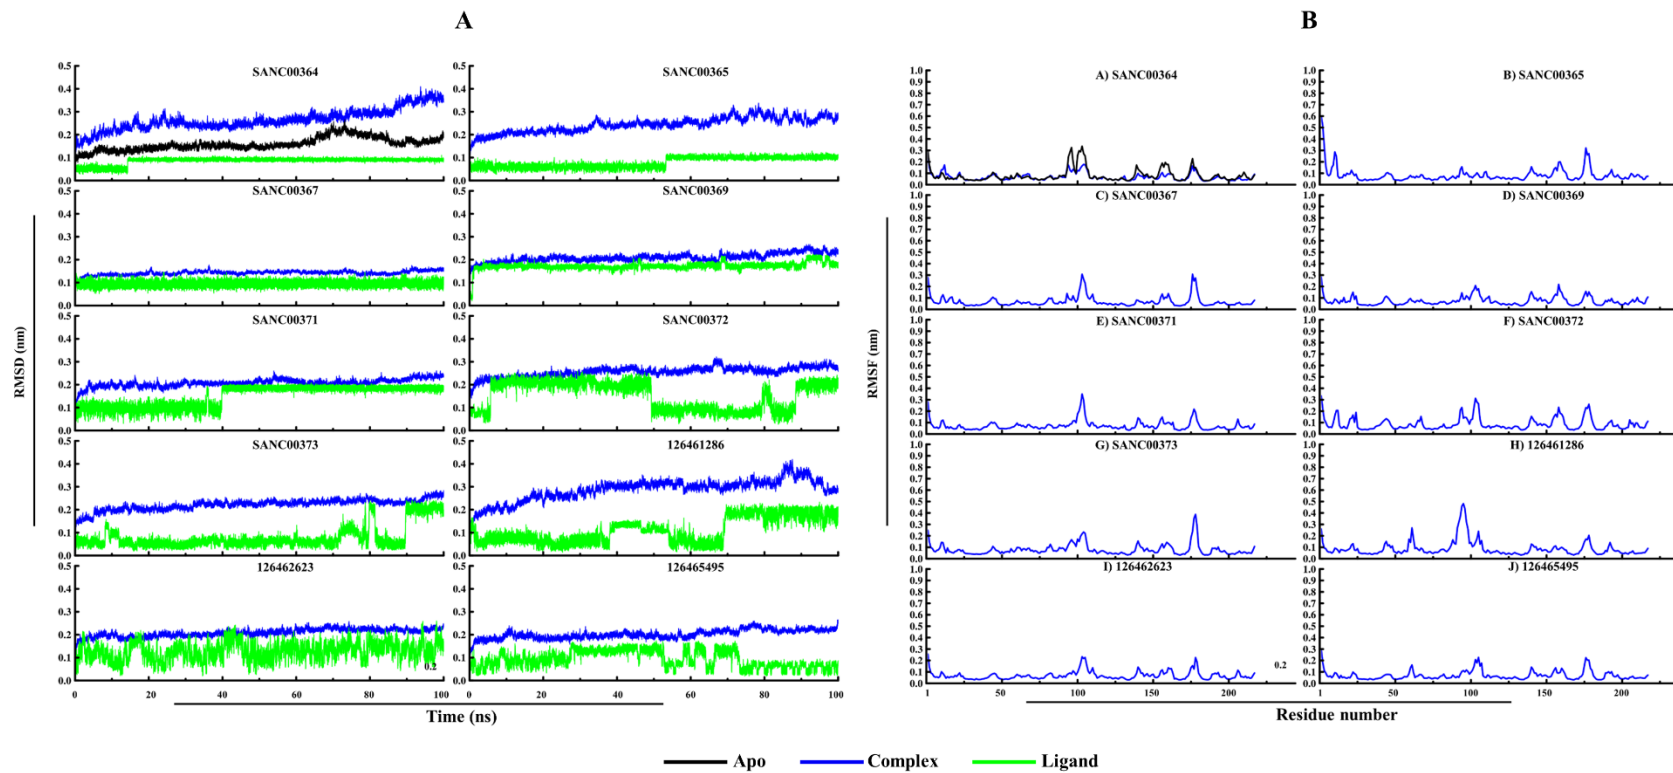

229

230 **Figure S12:** Time dependent evolution of RMSD (A) and RMSF (B) plots of Cat-L during 100 ns simulation. Color code: Black = Apo; Blue=  
 231 Complex and Green = Ligand only.

232

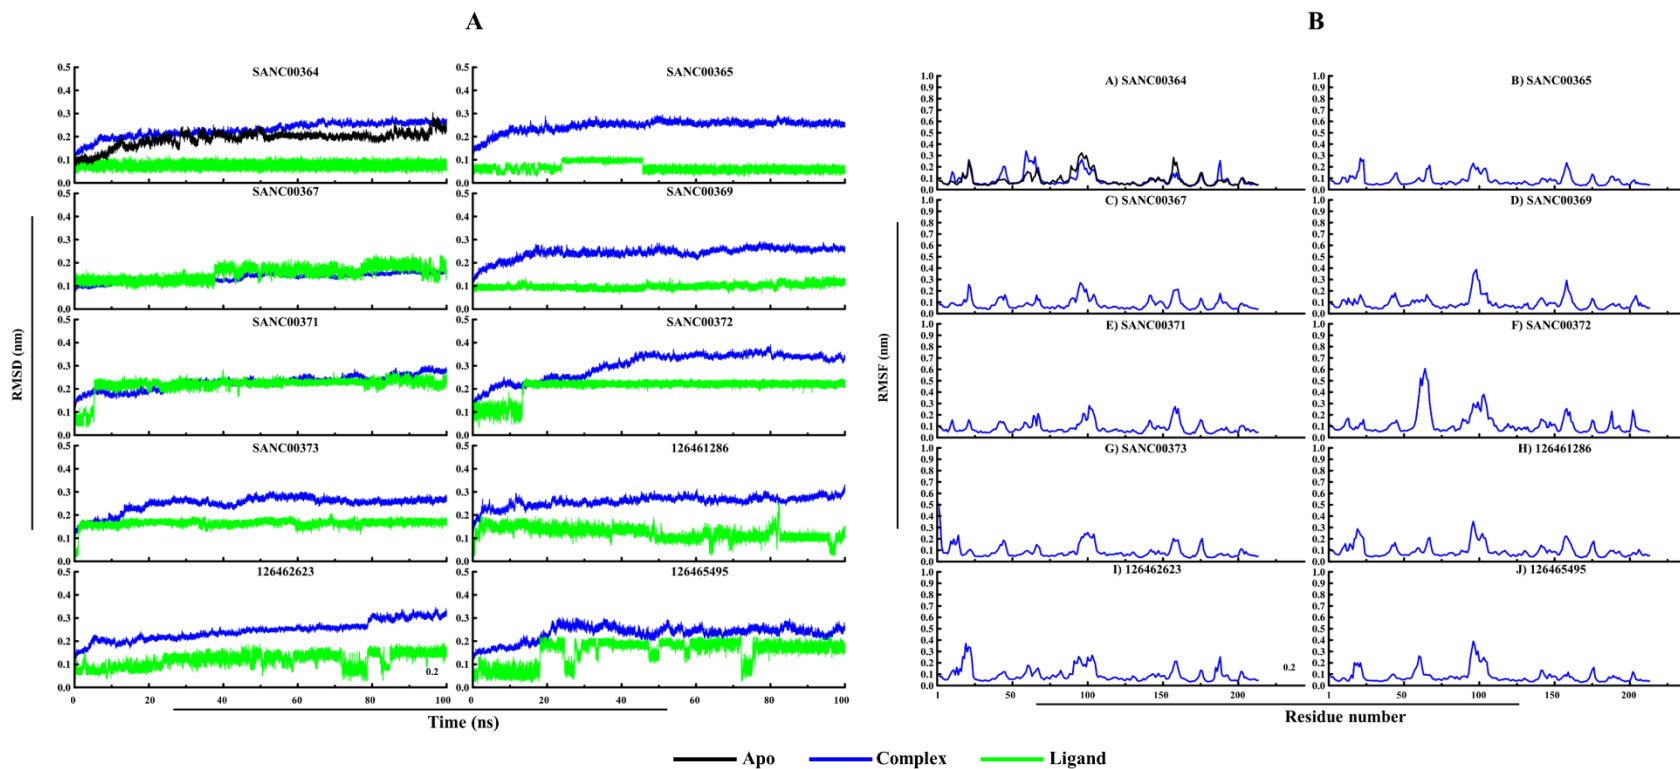

233

234 **Figure S13:** Time dependent evolution of RMSD (A) and RMSF (B) plots of Cat-S during 100 ns simulation. Color code: Black = Apo; Blue=  
235 Complex and Green = Ligand only.

236

237

238

239

240

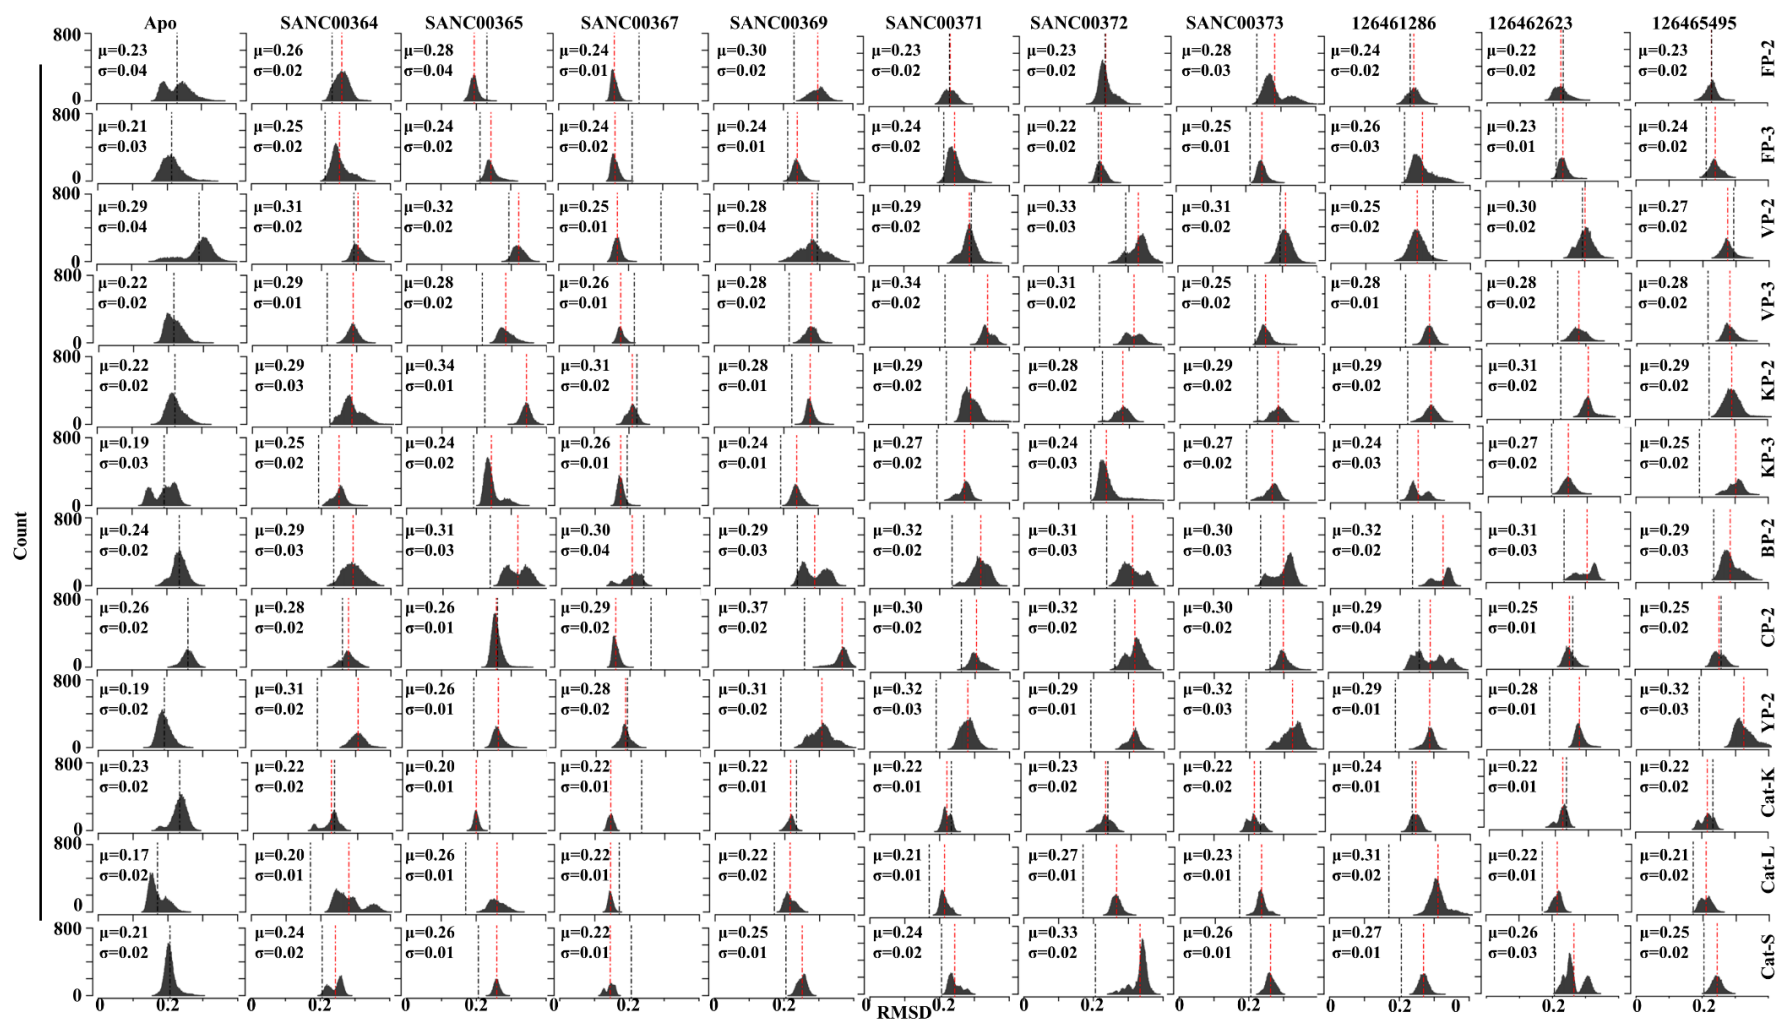

241

242 **Figure S14.**  $\alpha$  protein backbone RMSD distribution histogram plots for apo and ligand bound protein systems. The effect of ligand binding on  
 243 the global conformational variation for each protein can be determined by comparing the mean ( $\mu$ ) of the complex (dashed red line) and that of  
 244 the corresponding apo system.  $\sigma$  denotes the conformational distribution standard deviation over the last 70 ns of simulation.

245

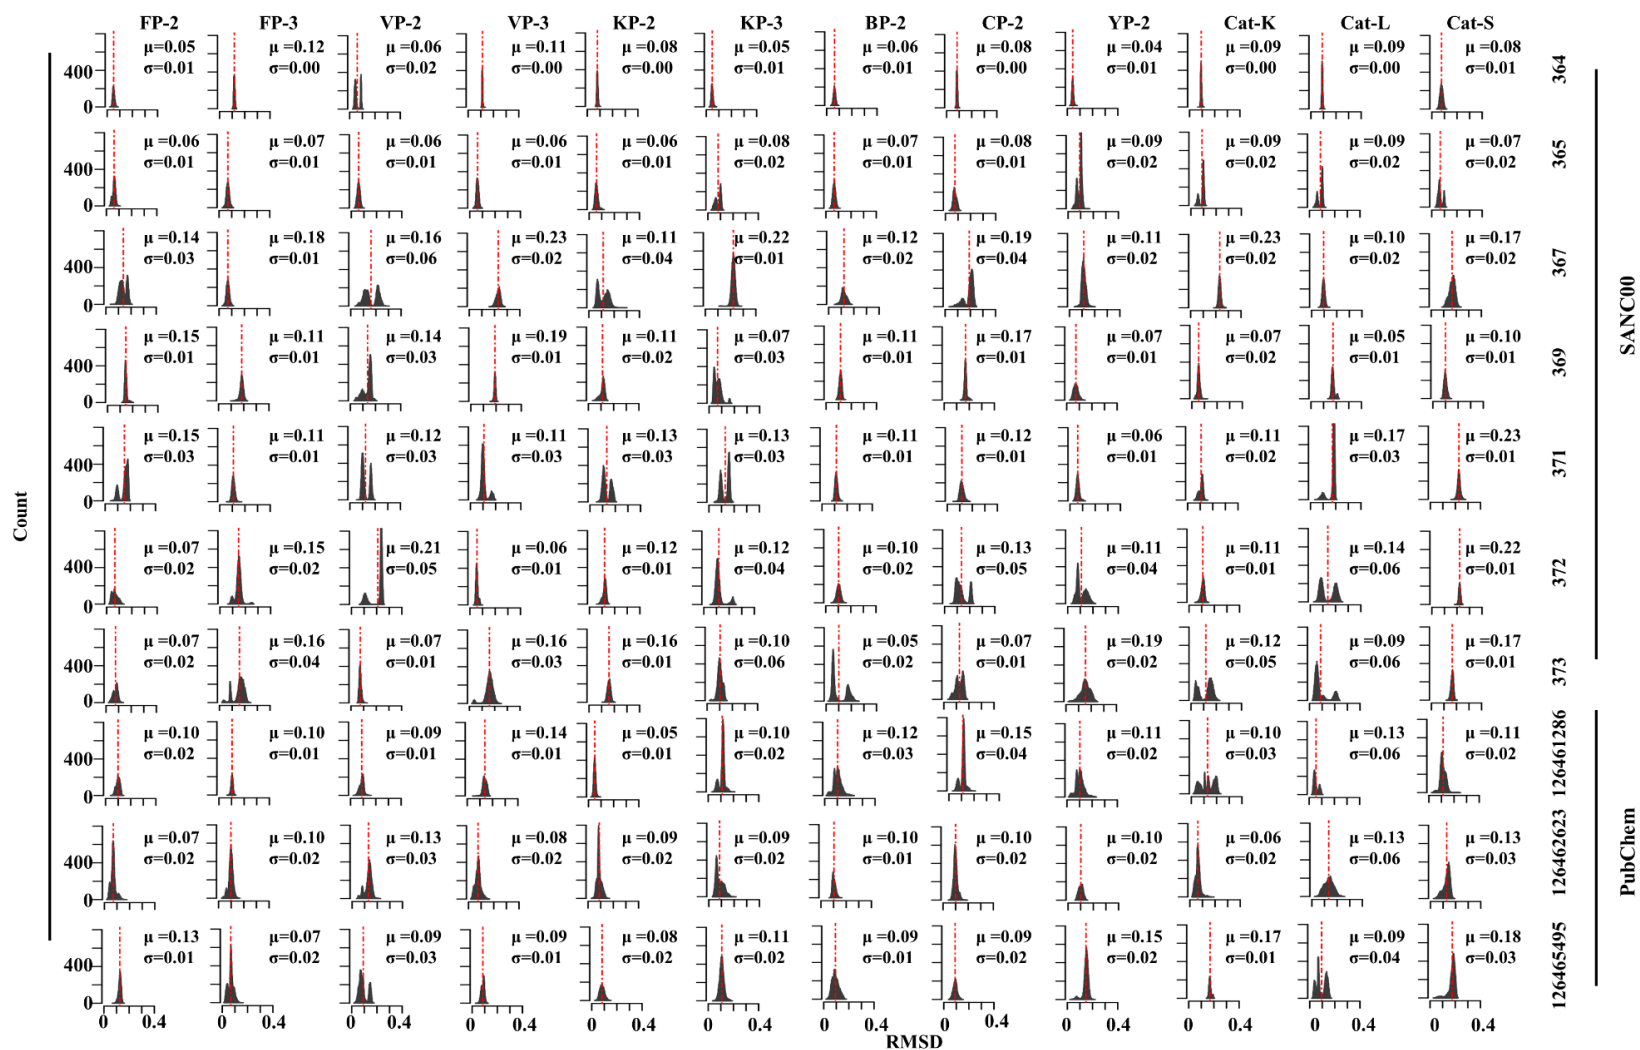

246

247 **Figure S15.** Ligand backbone RMSD distribution plots for the various ligands bound to plasmodial and human proteins. The dashed red line  
 248 indicates the RMSD mean ( $\mu$ ) per each ligand while  $\sigma$  denotes the standard deviation during the last 70 ns of simulation.

249

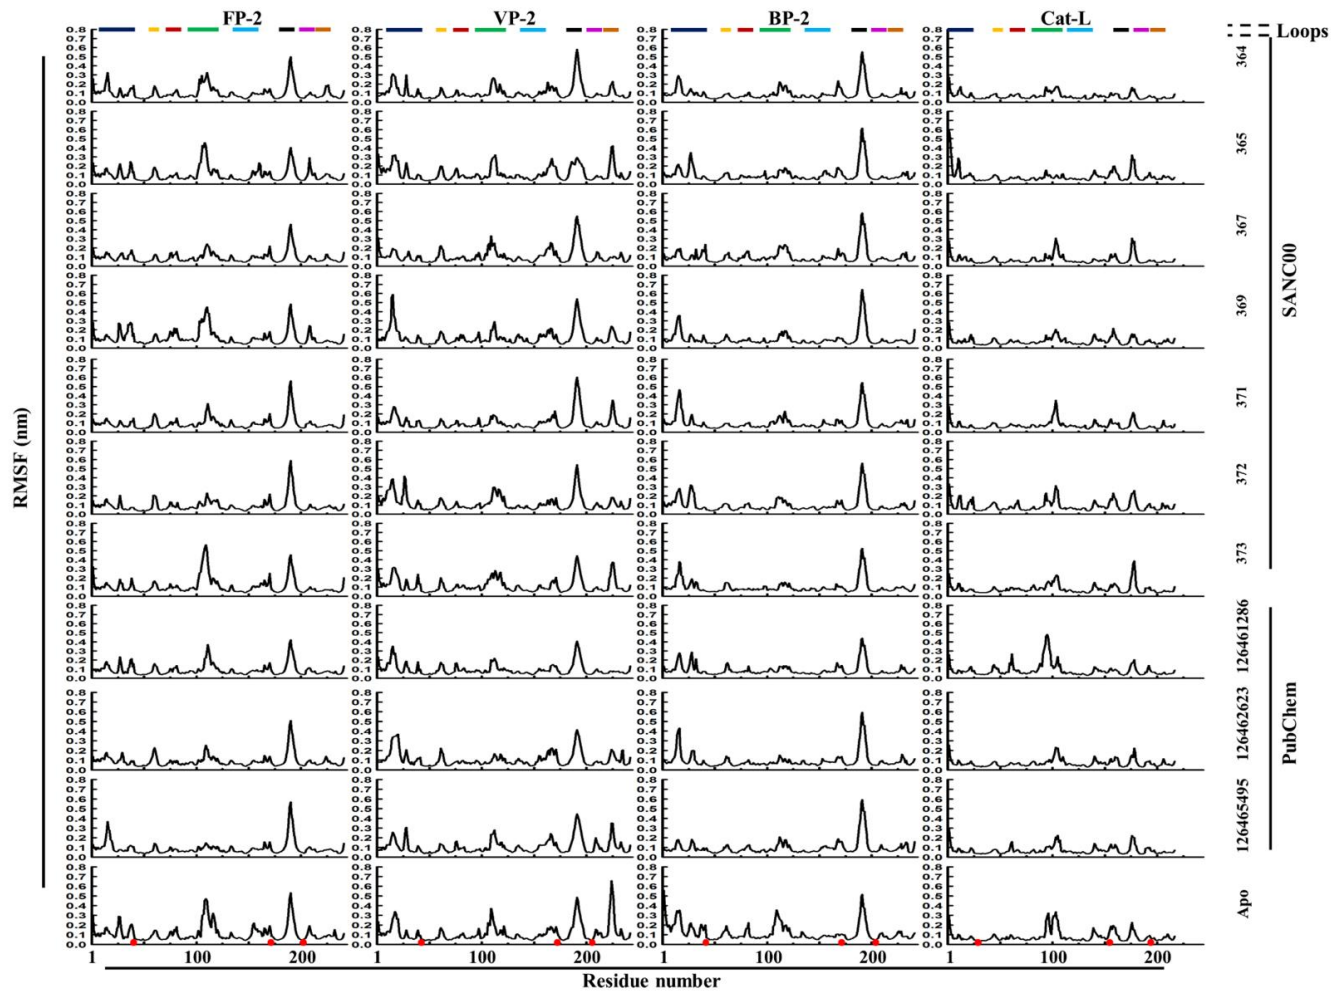

250

251 **Figure S16.** The effect of ligand binding on the fluctuations of each protein residue as determined by Root Mean Square Fluctuations (RMSF).  
 252 Marked in red wedges are the catalytic triad (Cys-His-Asn) residues of each protein. The colour bars at the top correspond to the protein loops as  
 253 shown on the right.

254

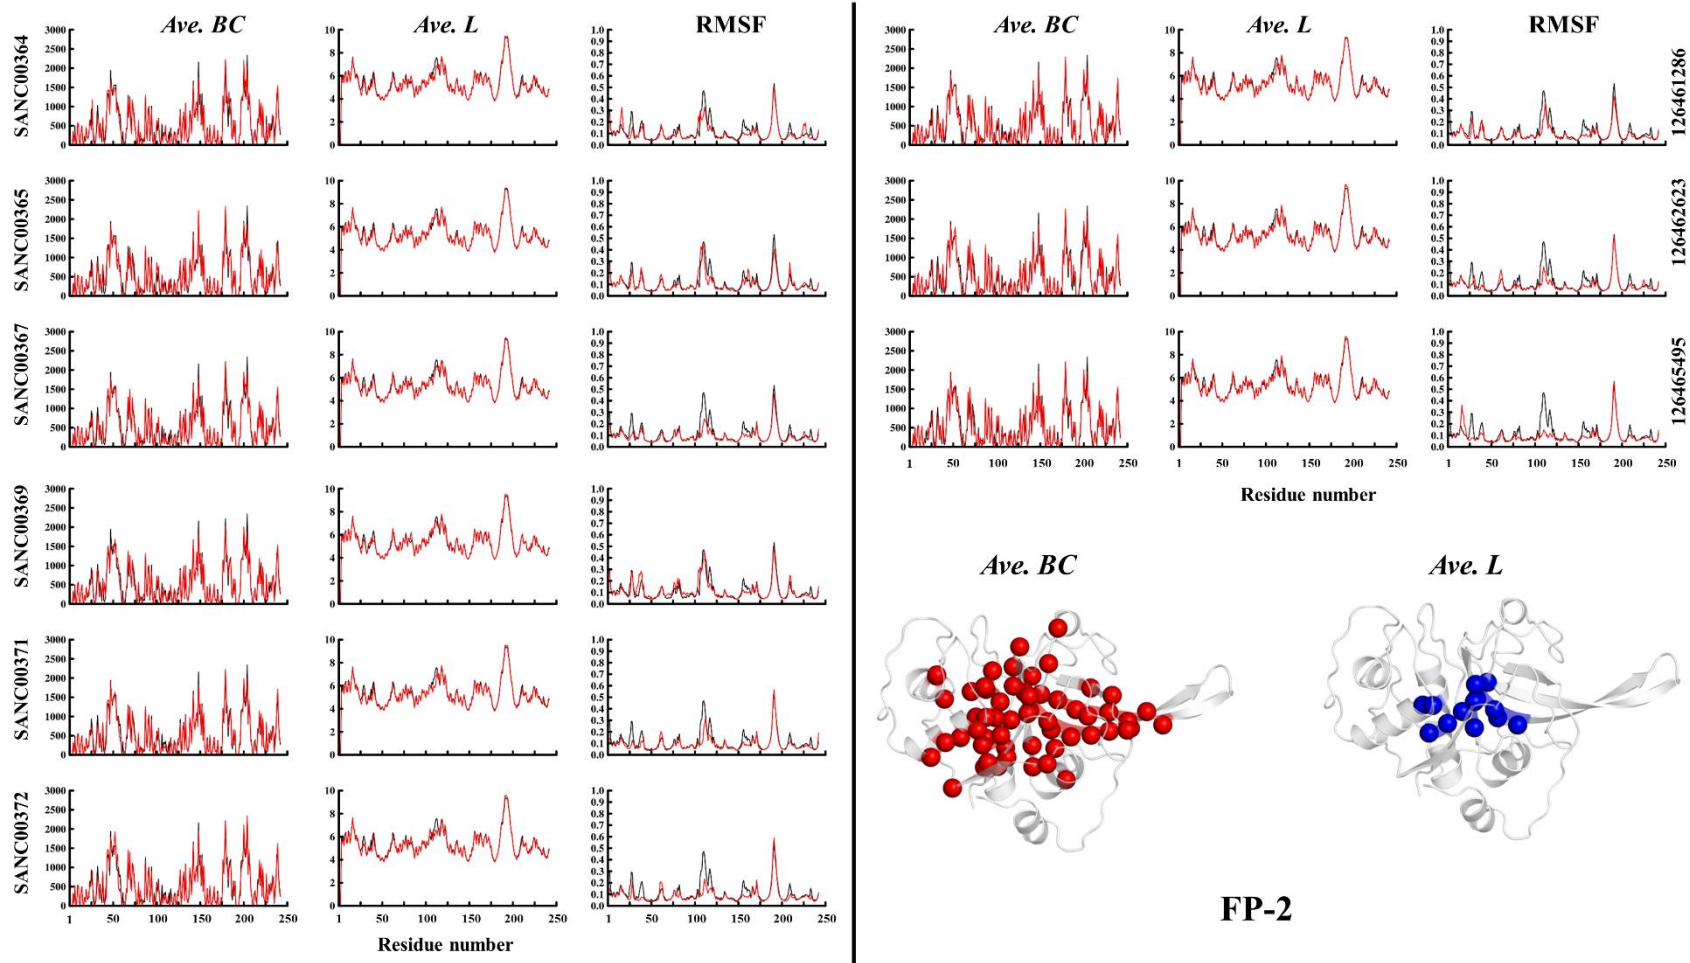

255

256 **Figure S17:** Dynamic residue network analysis (*betweenness of centrality* and *average shortest path*) of FP-2 in the presence of different  
 257 ligands. Color code: Black = Apo; Red= Complex. The location of residues with significant high *average BC* and low *average L* score are shown  
 258 in red and blue on the protein structure.

259

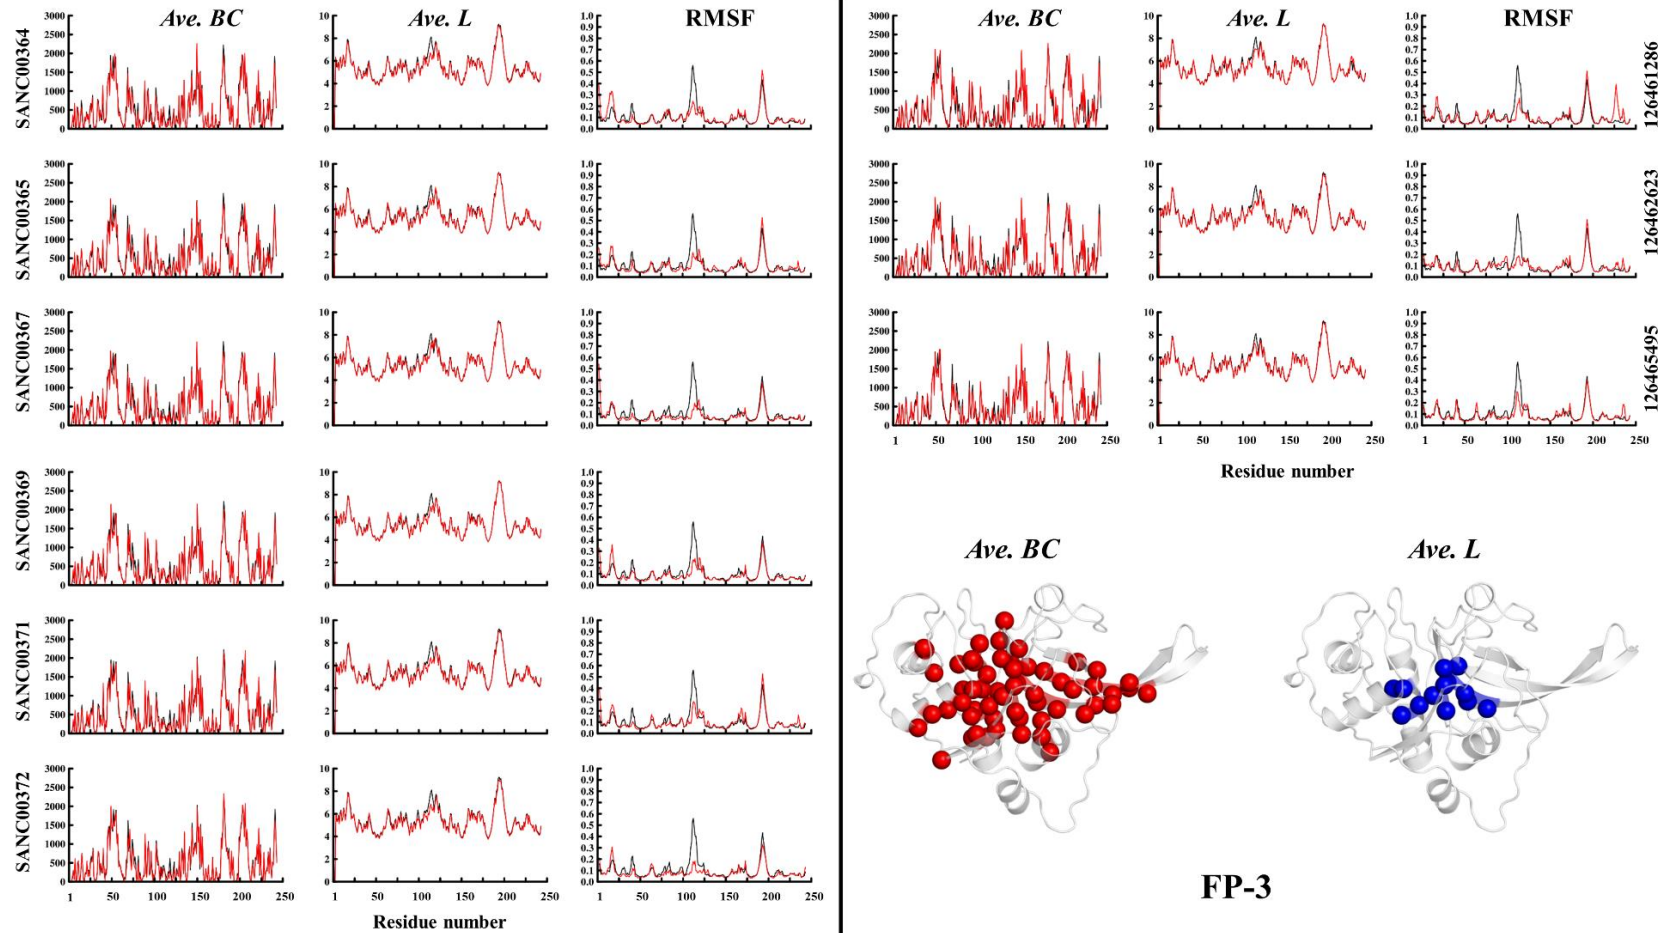

260

261

262 **Figure S18:** Dynamic residue network analysis (*betweenness of centrality* and *average shortest path*) of FP-3 in the presence of different  
 263 ligands. Color code: Black = Apo; Red= Complex. The location of residues with significant high *average BC* and low *average L* score are shown  
 264 in red and blue on the protein structure.

265

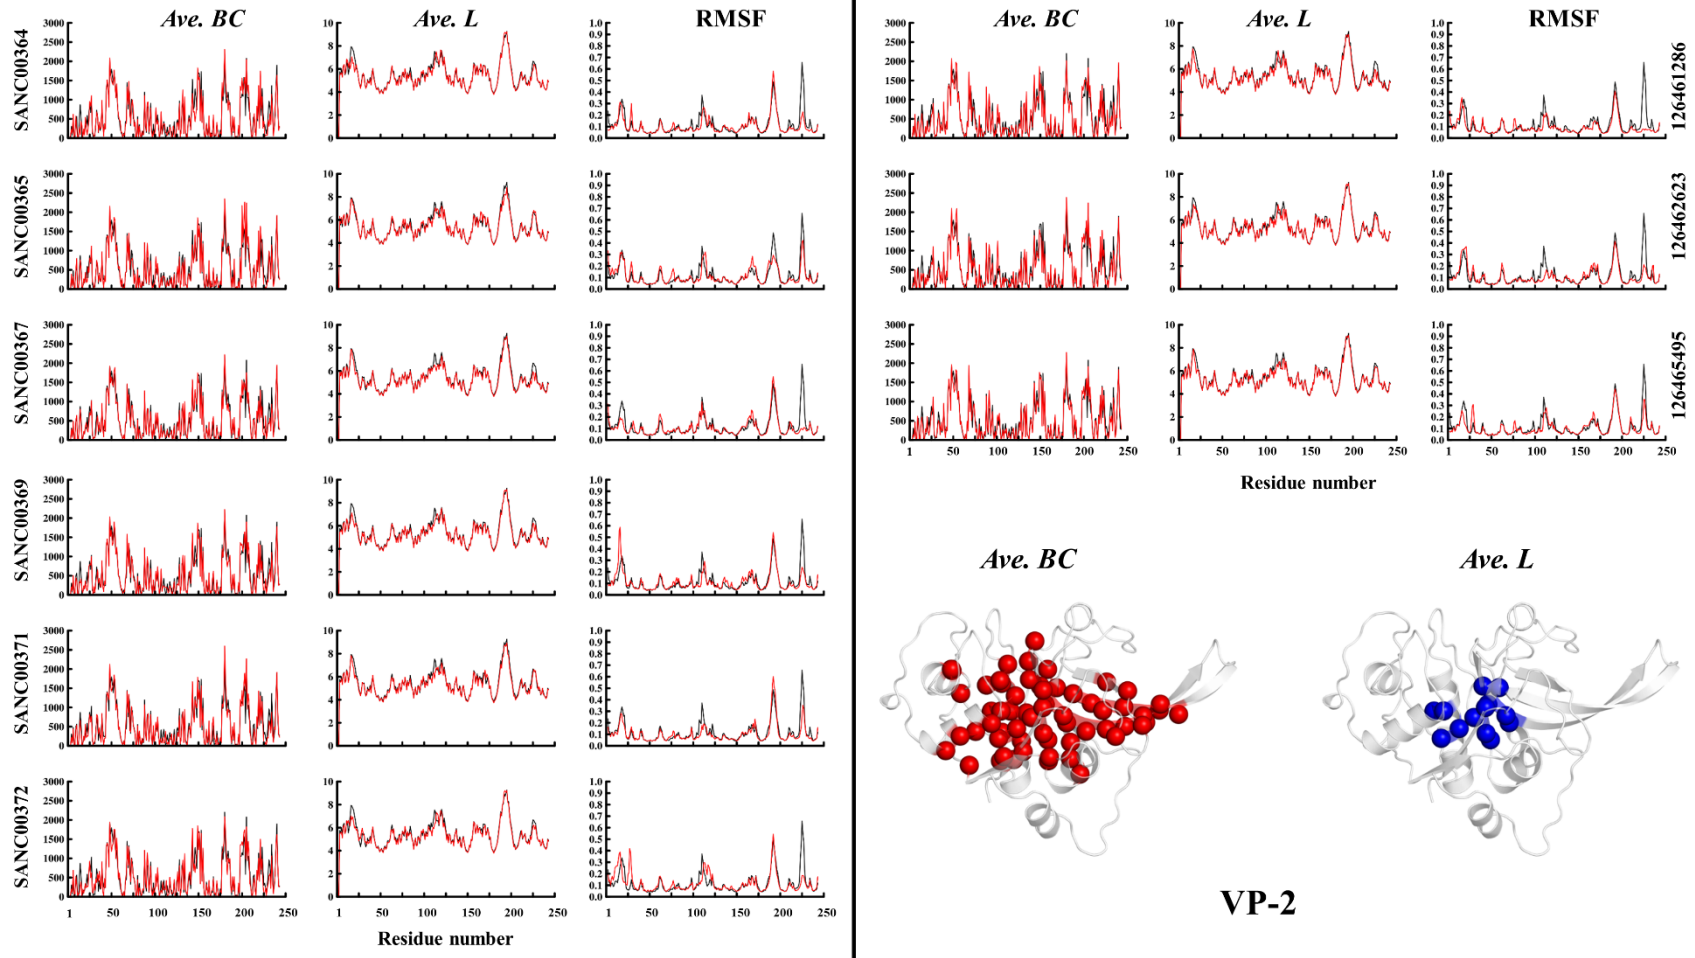

266

267 **Figure S19:** Dynamic residue network analysis (*betweenness of centrality* and *average shortest path*) of VP-2 in the presence of different  
 268 ligands. Color code: Black = Apo; Red= Complex. The location of residues with significant high *average BC* and low *average L* score are shown  
 269 in red and blue on the protein structure.

270



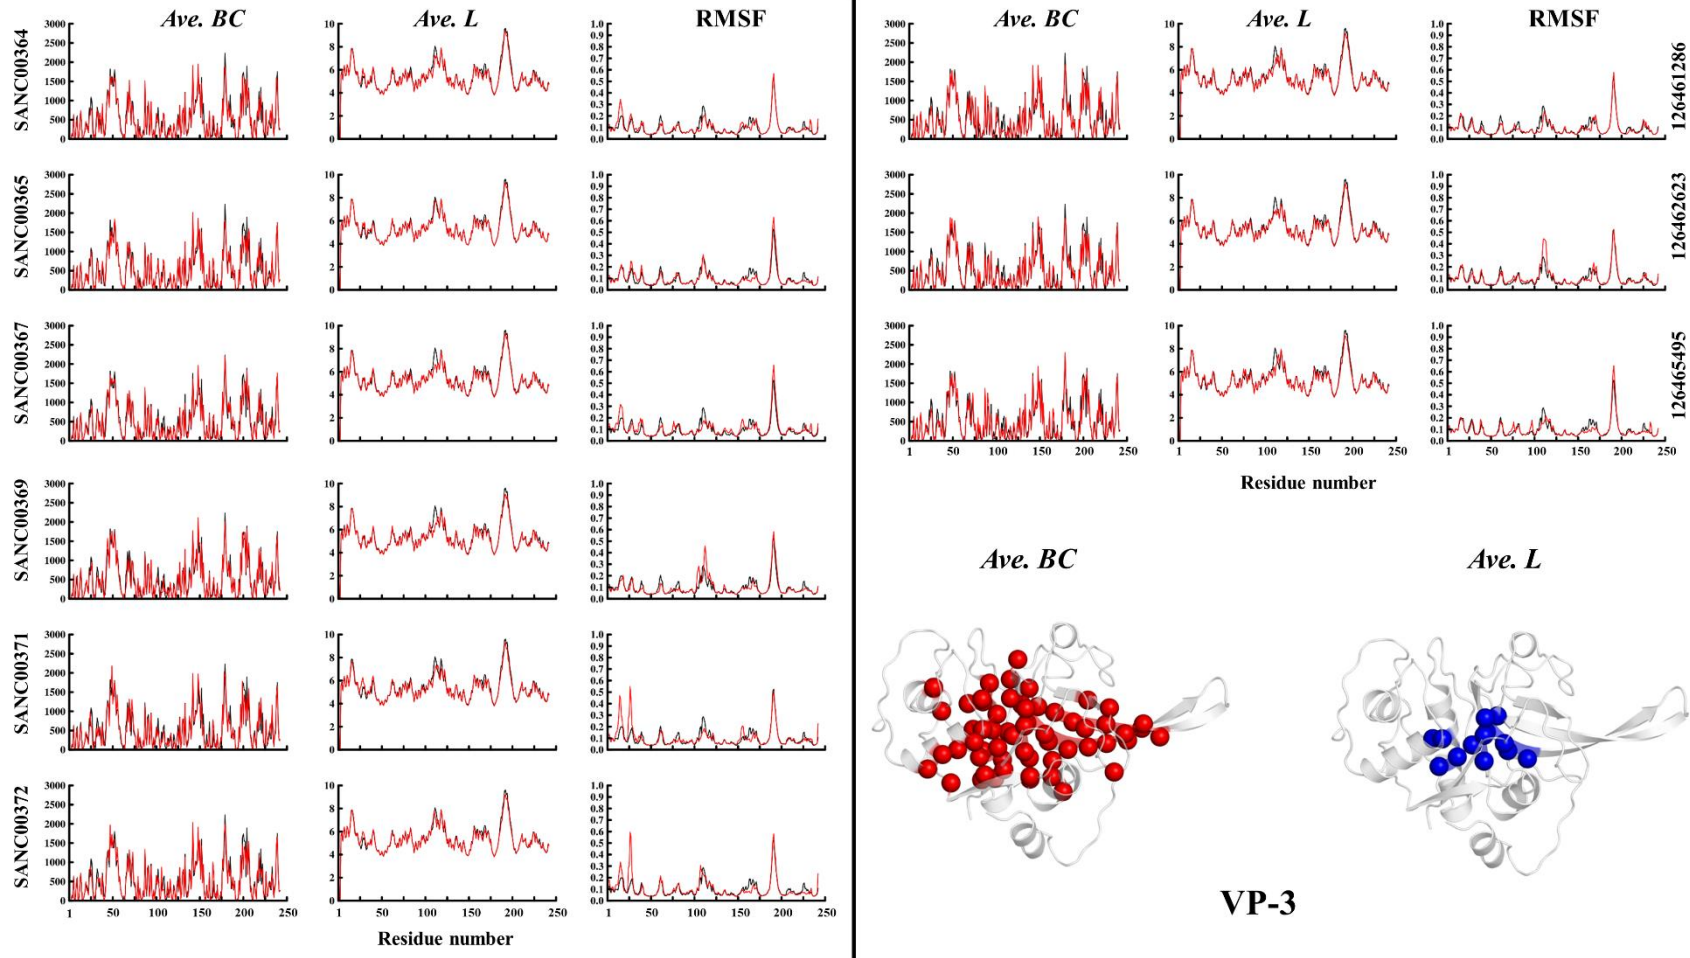

271

272 **Figure S20:** Dynamic residue network analysis (*betweenness of centrality* and *average shortest path*) of VP-3 in the presence of different  
 273 ligands. Color code: Black = Apo; Red= Complex. The location of residues with significant high *average BC* and low *average L* score are shown  
 274 in red and blue on the protein structure.  
 275

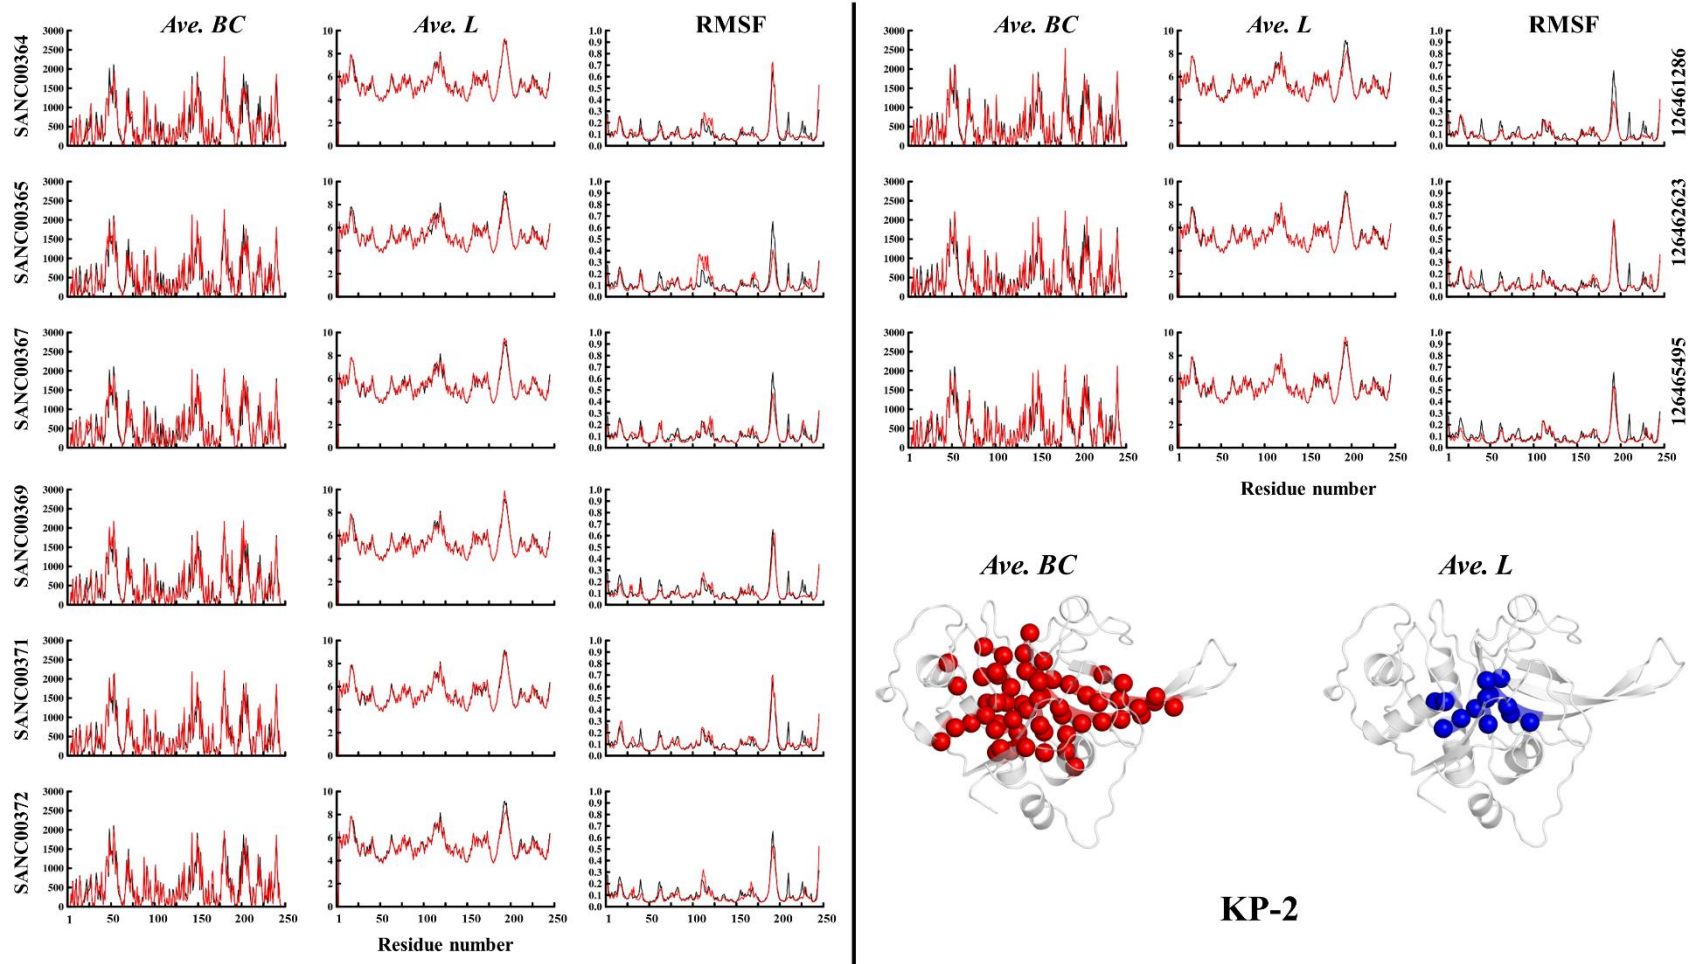

276

277 **Figure S21:** Dynamic residue network analysis (*betweenness of centrality* and *average shortest path*) of KP-2 in the presence of different  
 278 ligands. Color code: Black = Apo; Red= Complex. The location of residues with significant high *average BC* and low *average L* score are shown  
 279 in red and blue on the protein structure.

280

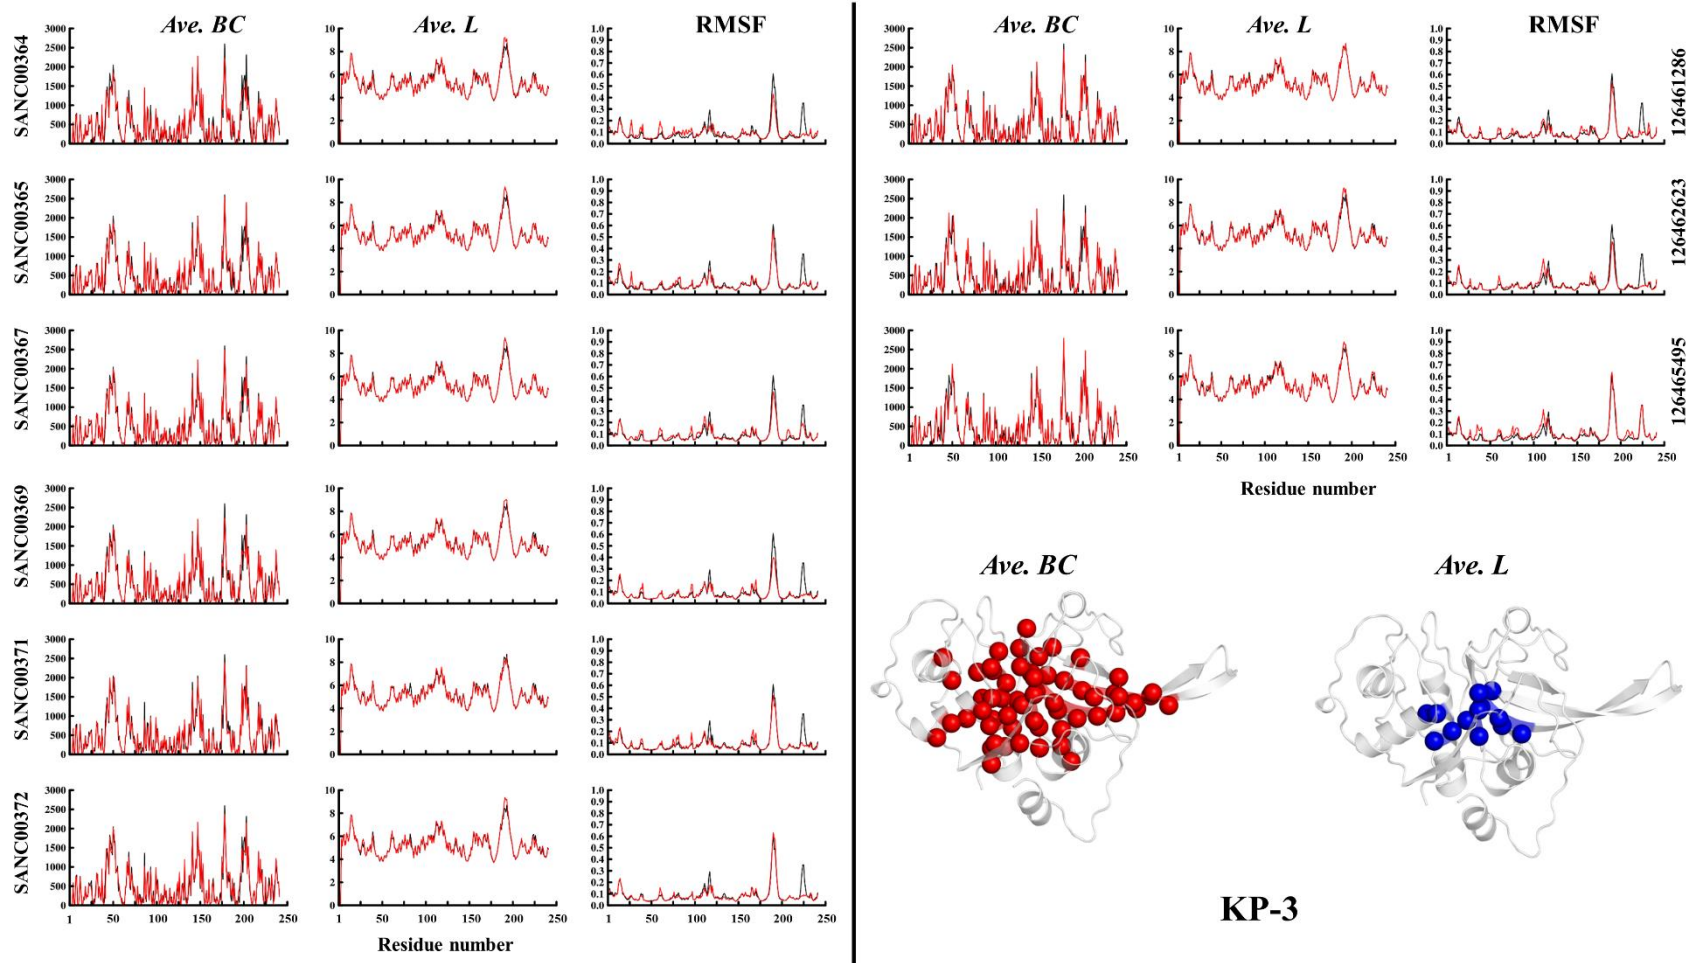

281

282 **Figure S22:** Dynamic residue network analysis (*betweenness of centrality* and *average shortest path*) of KP-3 in the presence of different  
 283 ligands. Color code: Black = Apo; Red= Complex. The location of residues with significant high *average BC* and low *average L* score are shown  
 284 in red and blue on the protein structure.

285

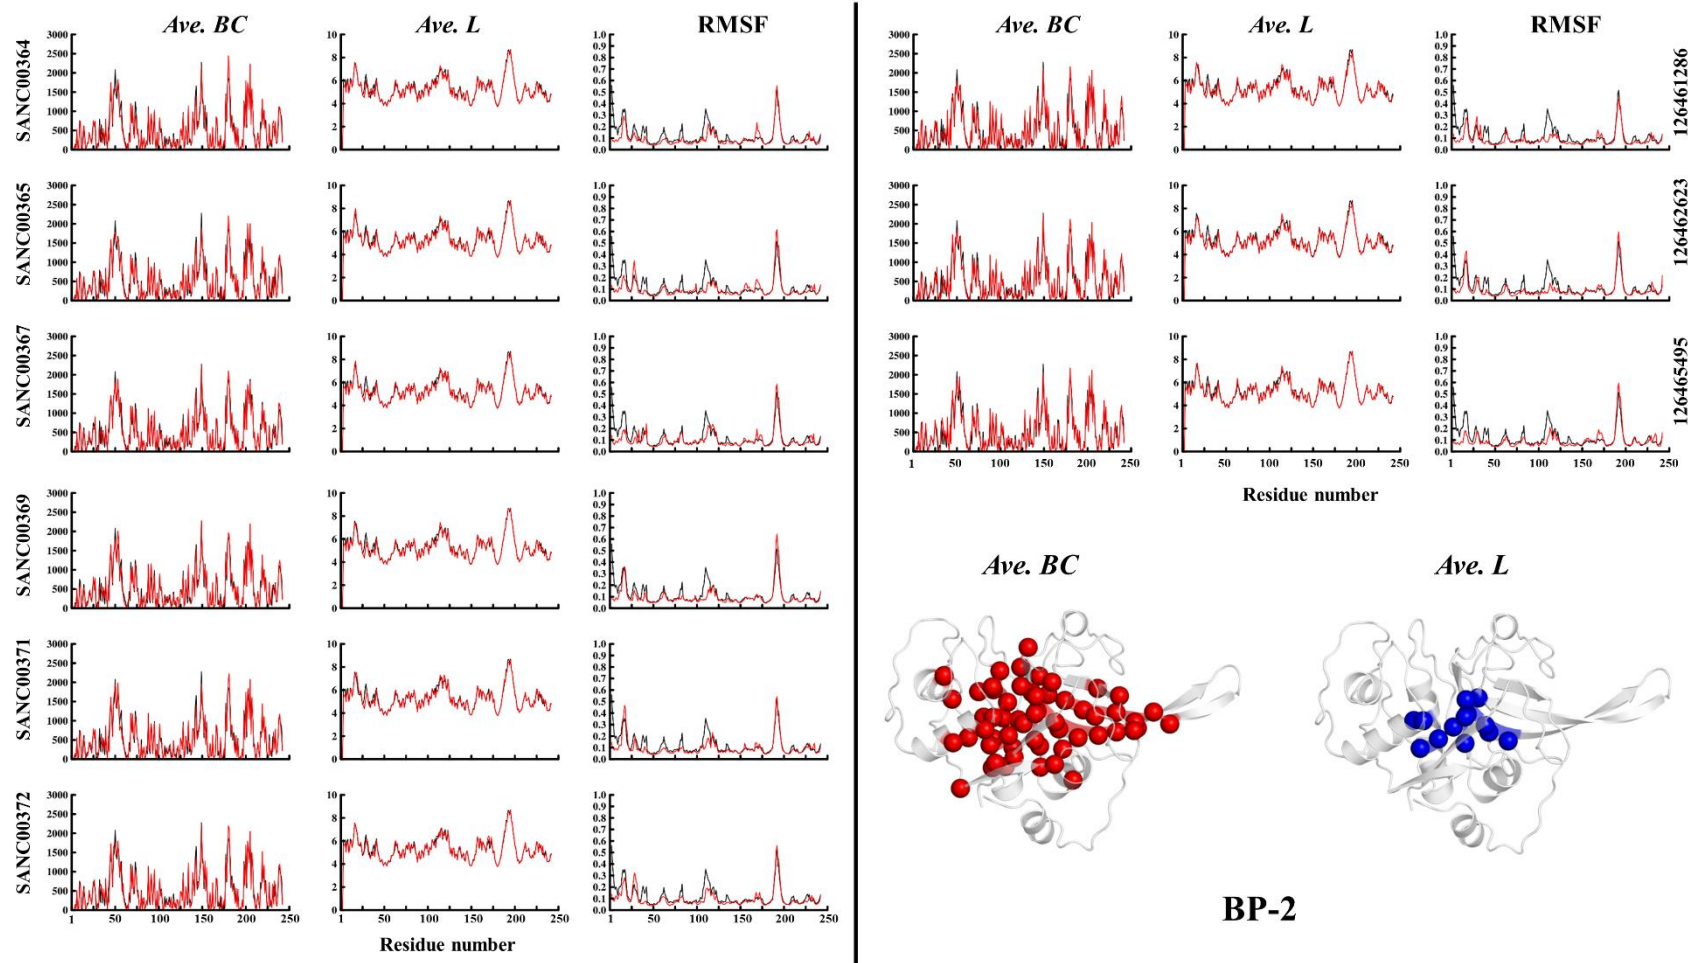

286

287 **Figure S23:** Dynamic residue network analysis (*betweenness of centrality* and *average shortest path*) of BP-2 in the presence of different  
 288 ligands. Color code: Black = Apo; Red= Complex. The location of residues with significant high *average BC* and low *average L* score are shown  
 289 in red and blue on the protein structure.

290

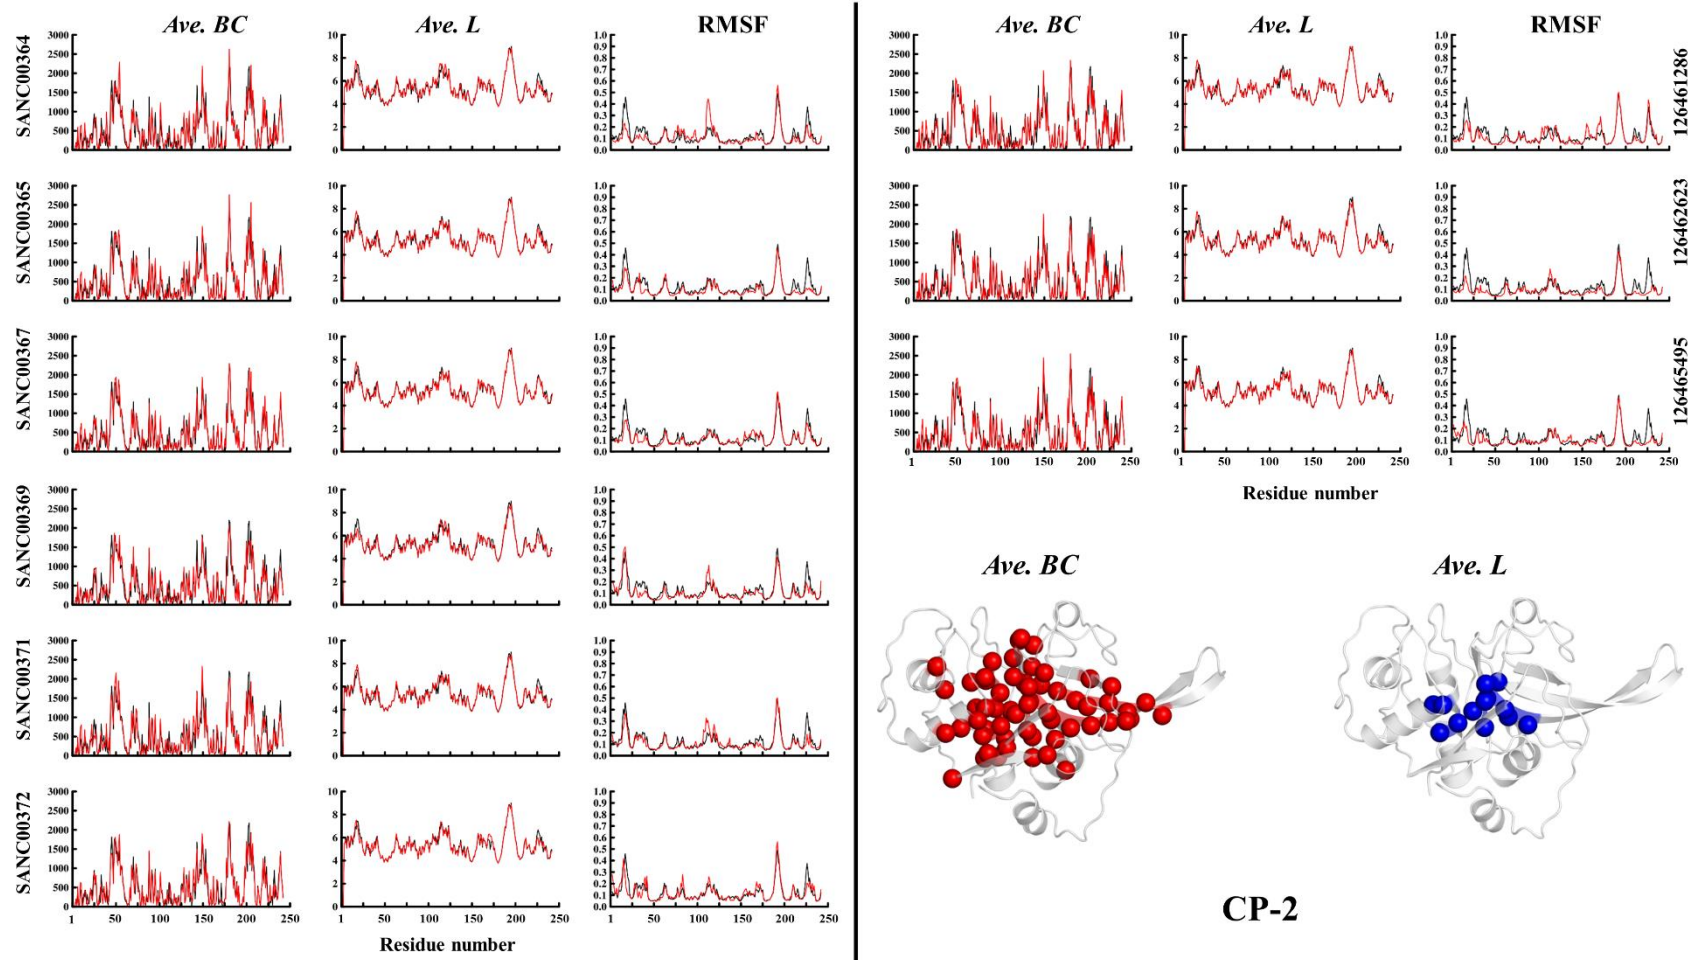

291

292 **Figure S24:** Dynamic residue network analysis (*betweenness of centrality* and *average shortest path*) of CP-2 in the presence of different  
 293 ligands. Color code: Black = Apo; Red= Complex. The location of residues with significant high *average BC* and low *average L* score are shown  
 294 in red and blue on the protein structure.

295

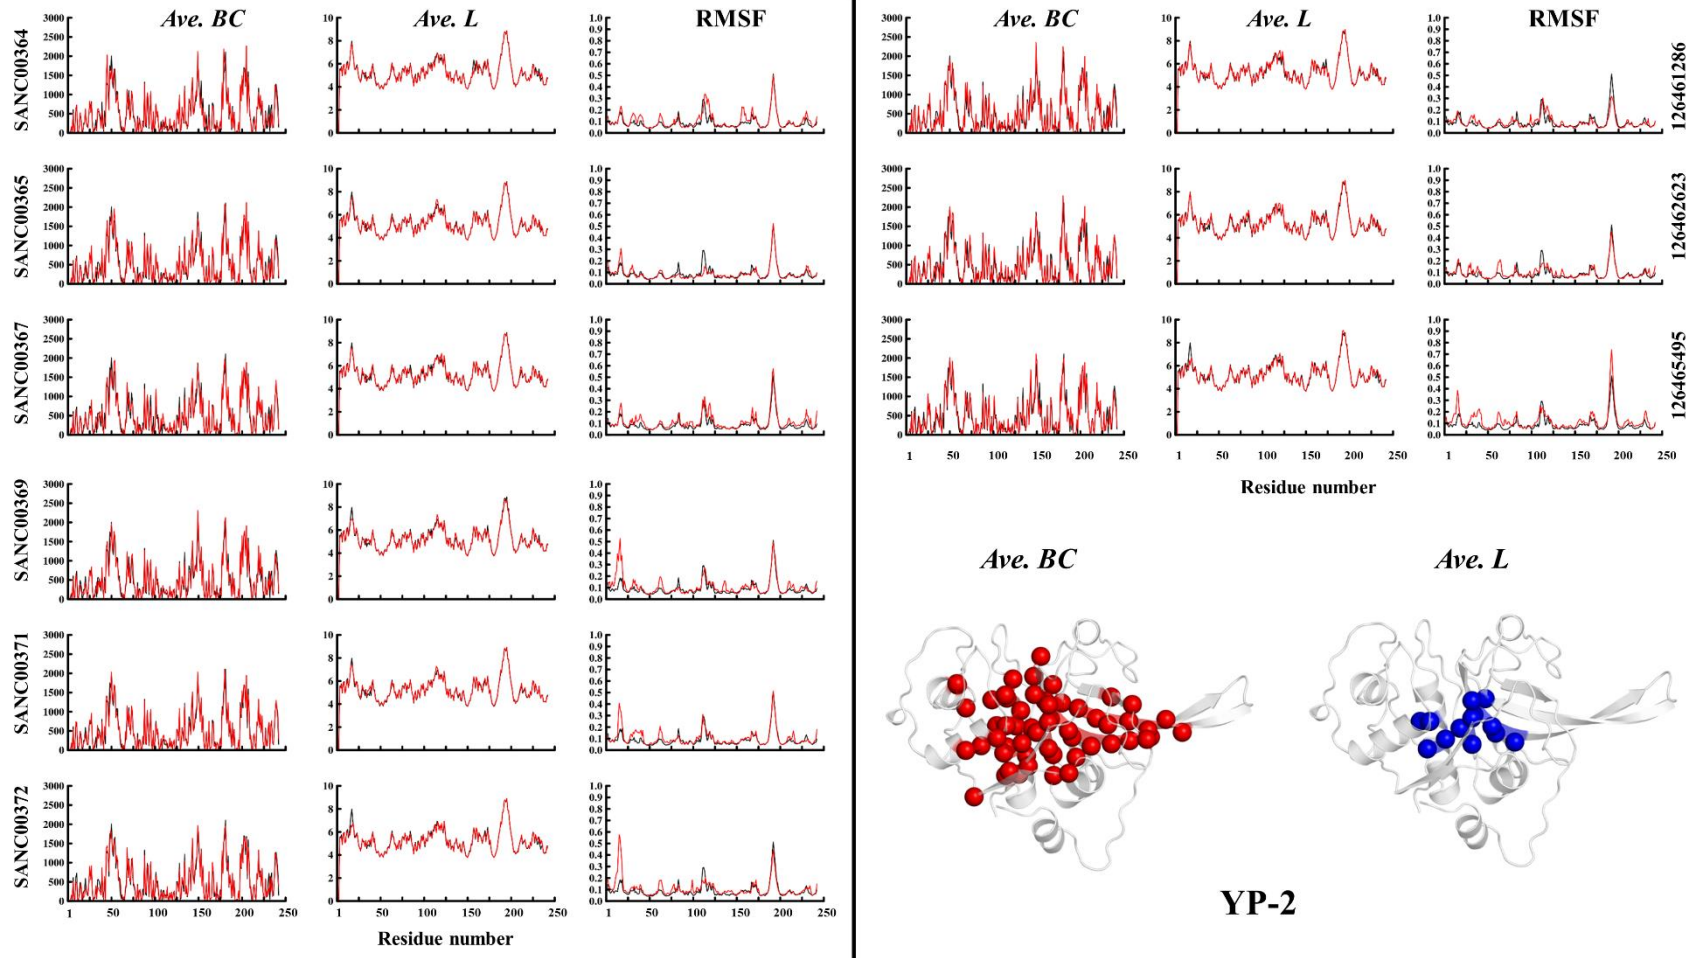

296

297 **Figure S25:** Dynamic residue network analysis (*betweenness of centrality* and *average shortest path*) of YP-2 in the presence of different  
 298 ligands. Color code: Black = Apo; Red= Complex. The location of residues with significant high *average BC* and low *average L* score are shown  
 299 in red and blue on the protein structure.

300

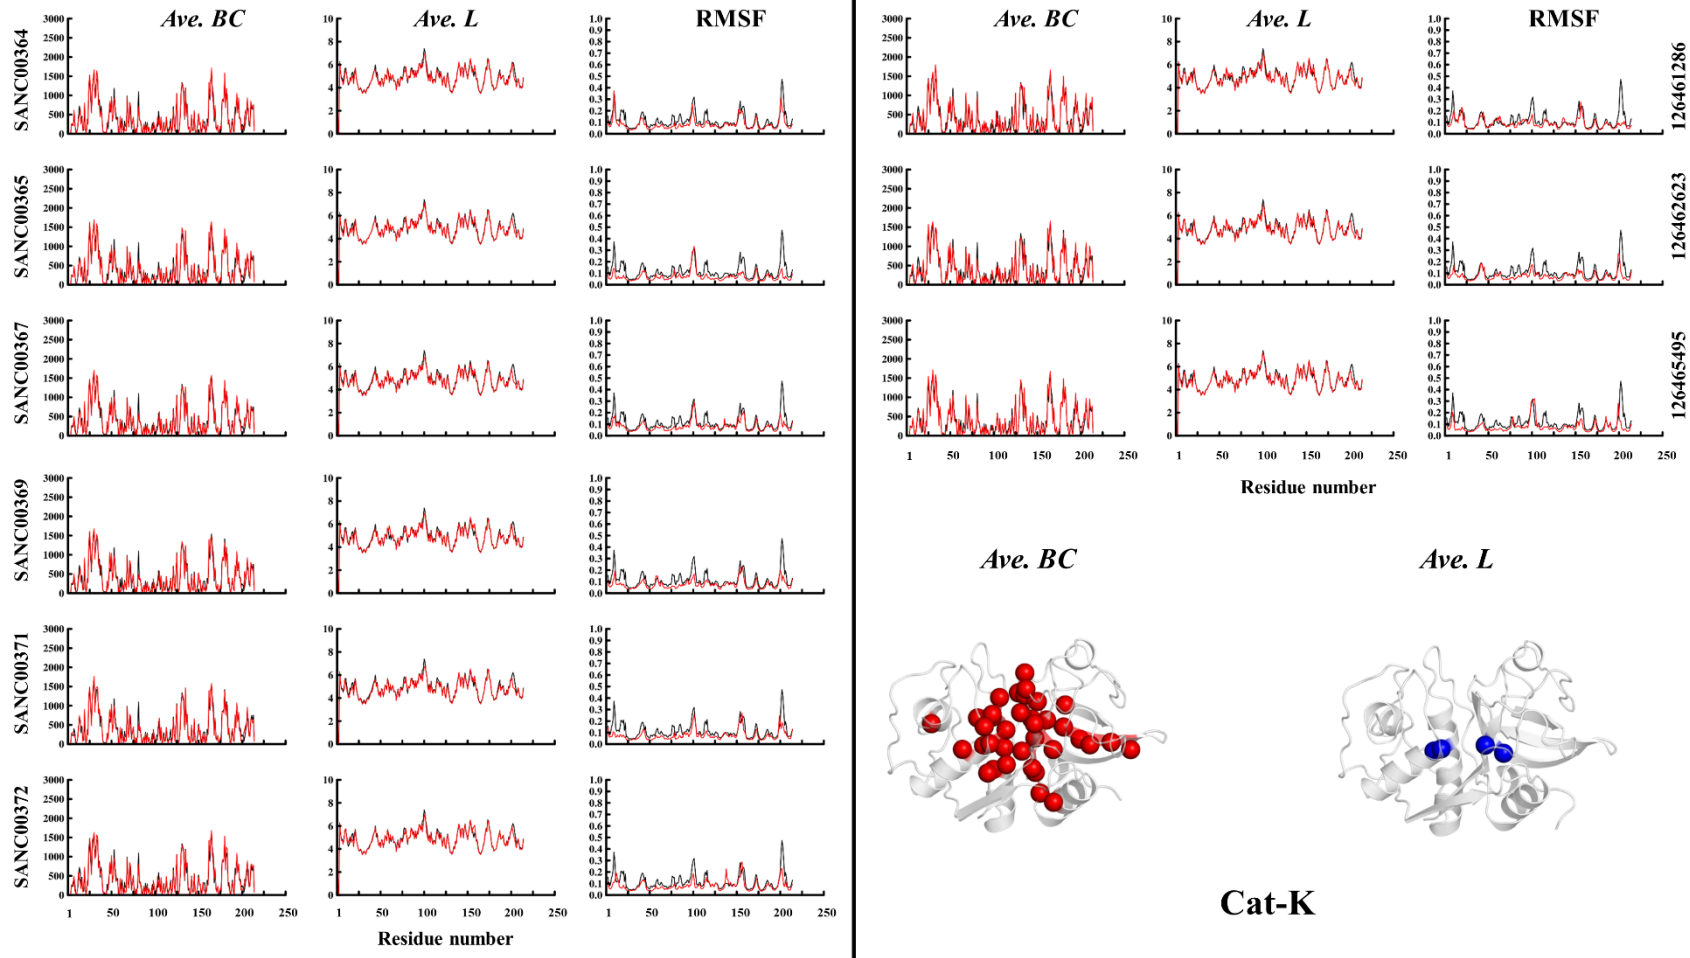

301

302 **Figure S26:** Dynamic residue network analysis (*betweenness of centrality* and *average shortest path*) of Cat-K in the presence of different  
 303 ligands. Color code: Black = Apo; Red= Complex. The location of residues with significant high *average BC* and low *average L* score are shown  
 304 in red and blue on the protein structure.

305

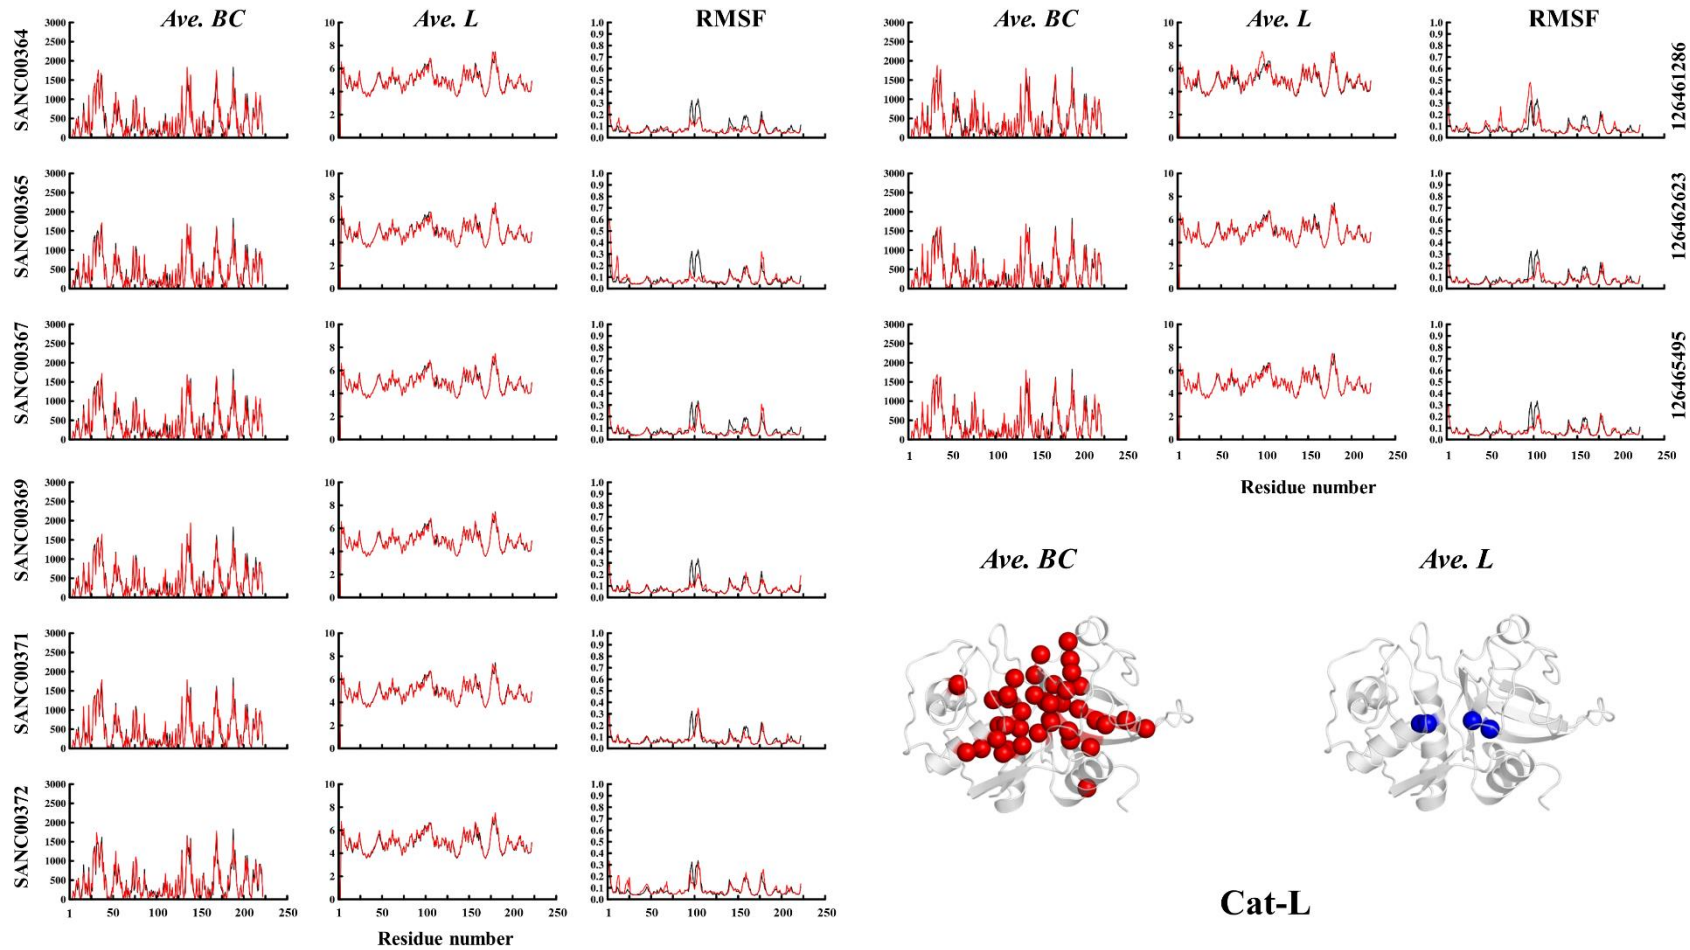

306

307 **Figure S27:** Dynamic residue network analysis (*betweenness of centrality* and *average shortest path*) of Cat-L in the presence of different  
 308 ligands. Color code: Black = Apo; Red= Complex. The location of residues with significant high *average BC* and low *average L* score are shown  
 309 in red and blue on the protein structure.

310



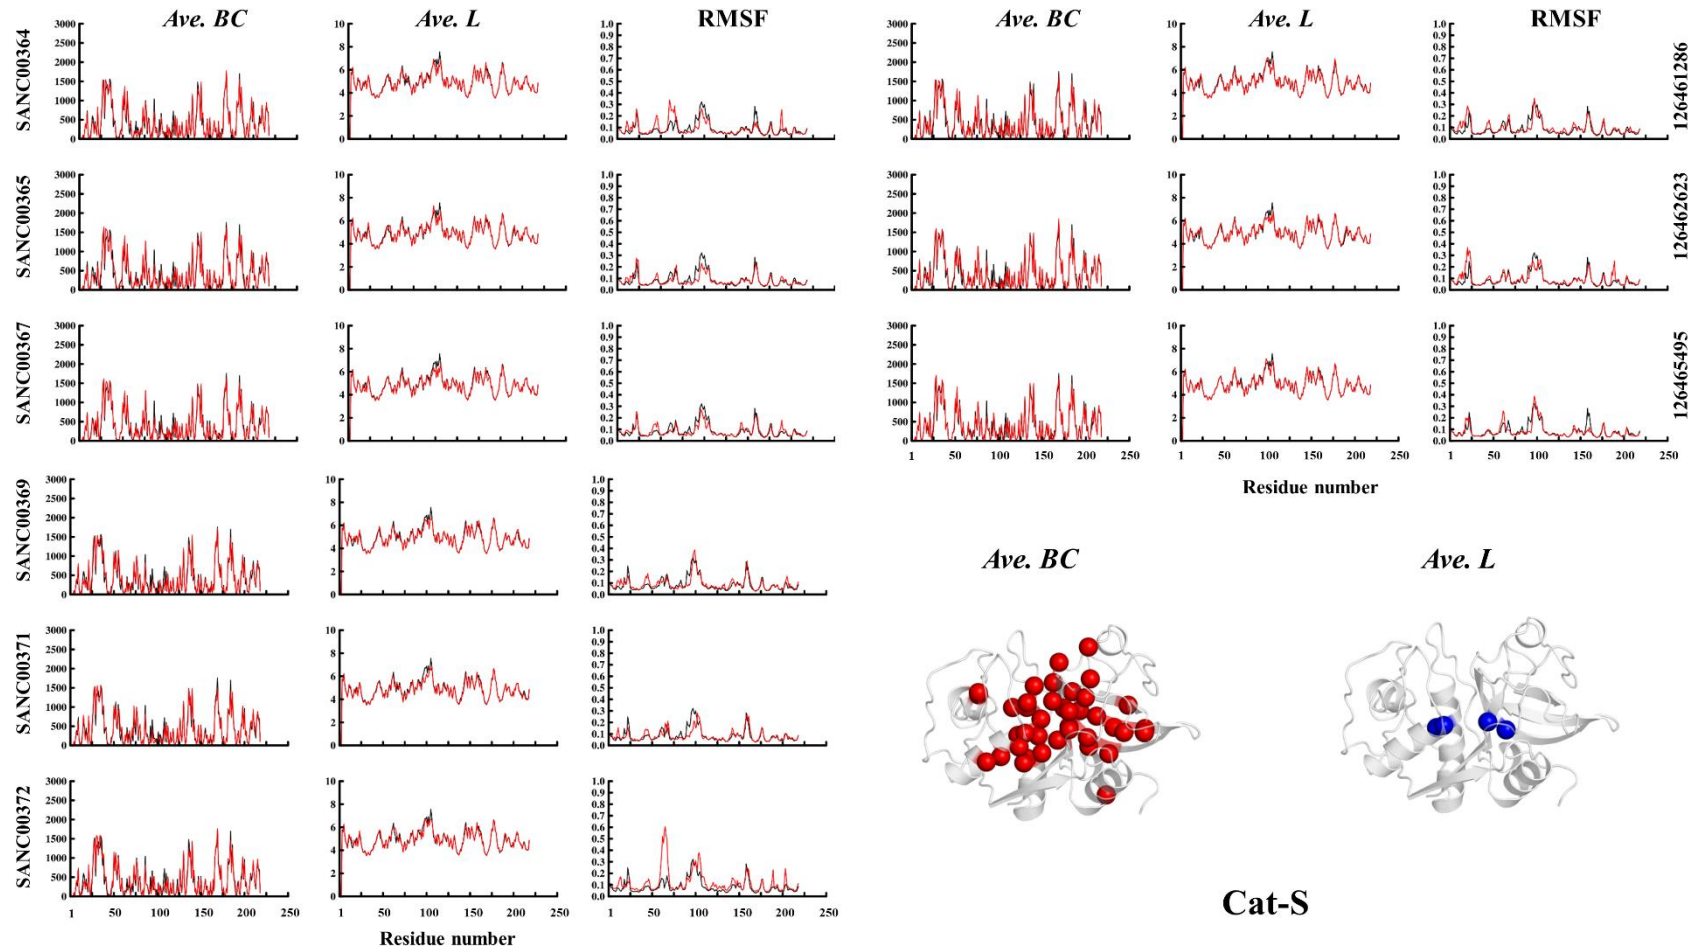

311

312 **Figure S28:** Dynamic residue network analysis (*betweenness of centrality* and *average shortest path*) of Cat-S in the presence of different  
 313 ligands. Color code: Black = Apo; Red= Complex. The location of residues with significant high *average BC* and low *average L* score are shown  
 314 in red and blue on the protein structure.

315

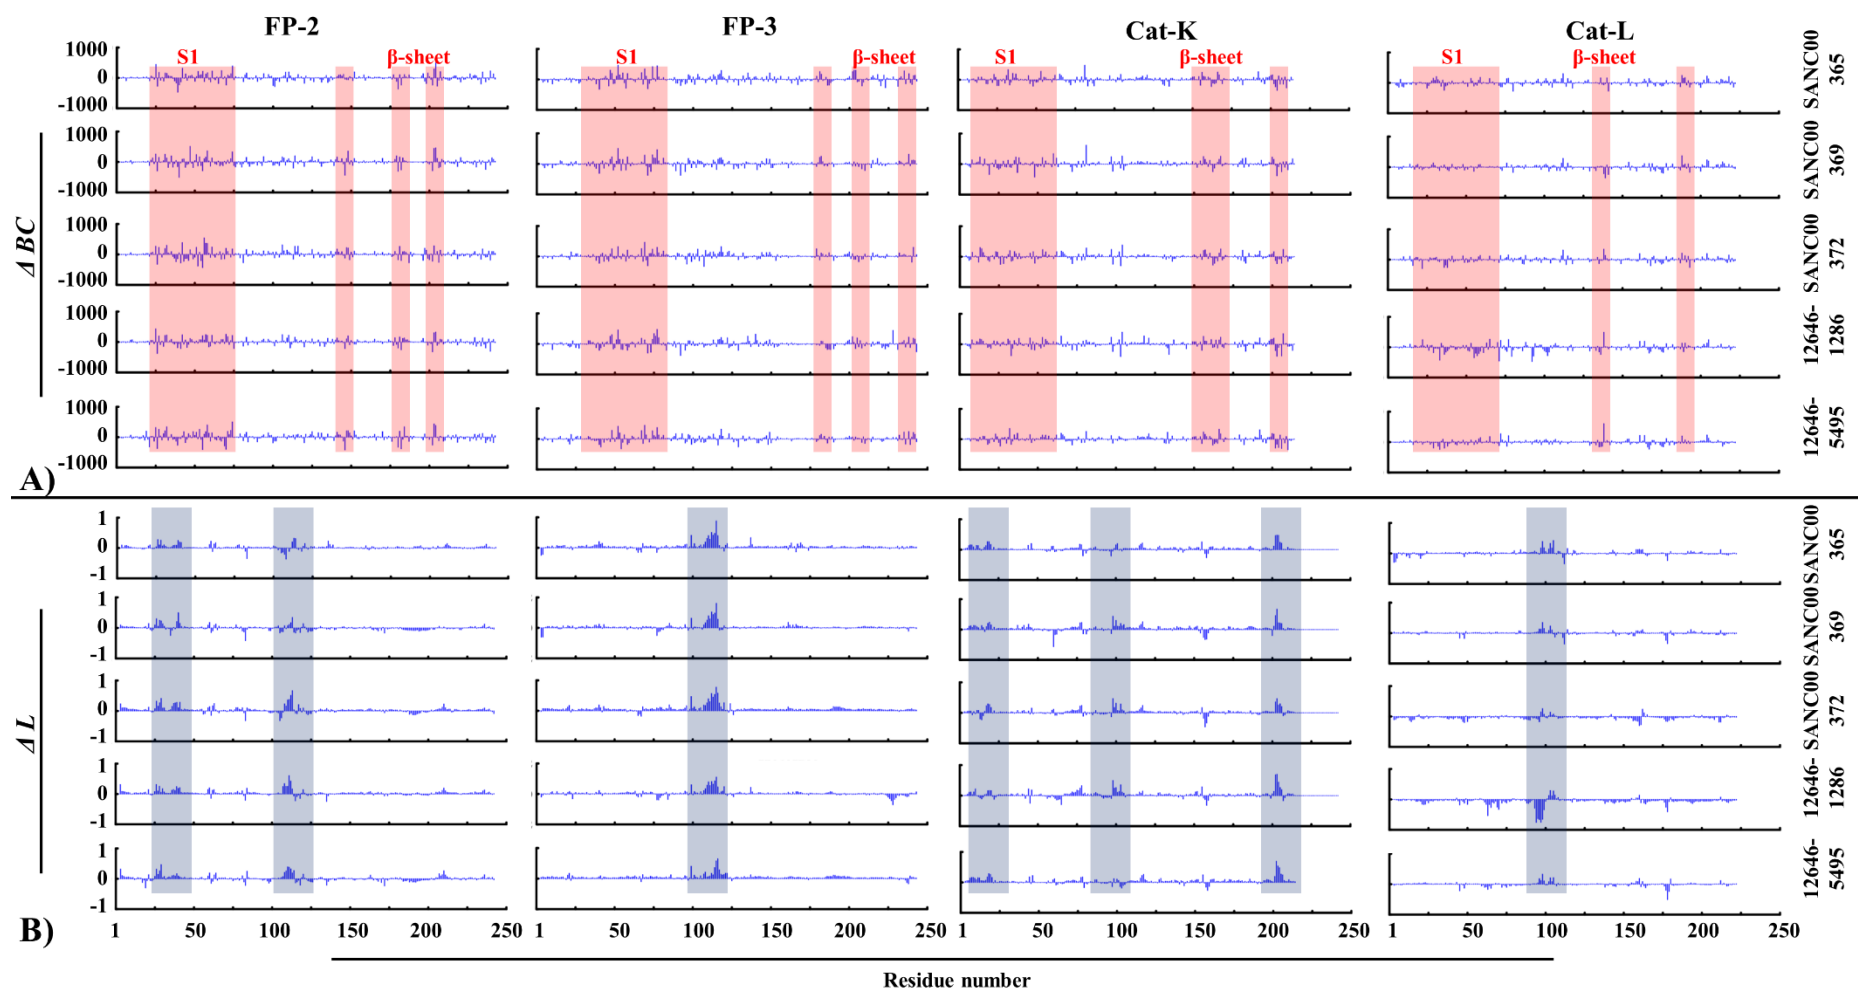

316

317 **Figure S29.** Effect of ligand binding on  $BC$  (A) and  $L$  (B) using the apo structures as the reference. Shaded are regions of the protein that  
 318 showed significant changes (one and half times away from the means of the ligand bound systems) in  $BC$  (red) and  $L$  (blue).

319

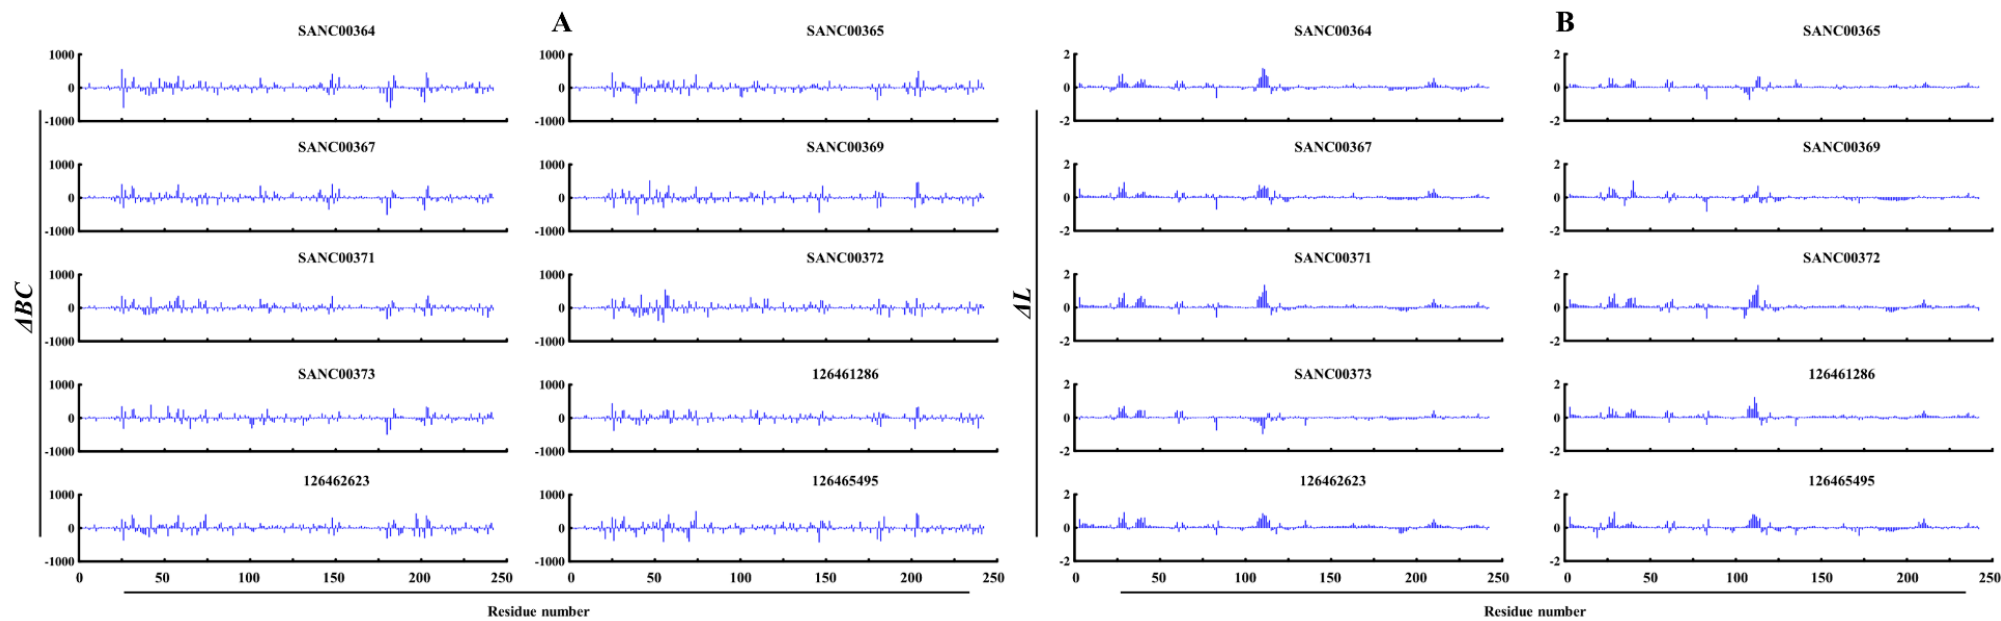

320

321 **Figure S30:** Plots showing FP-2 residues with significant changes in *average* a) *BC* and B) *L* upon ligand binding.

322

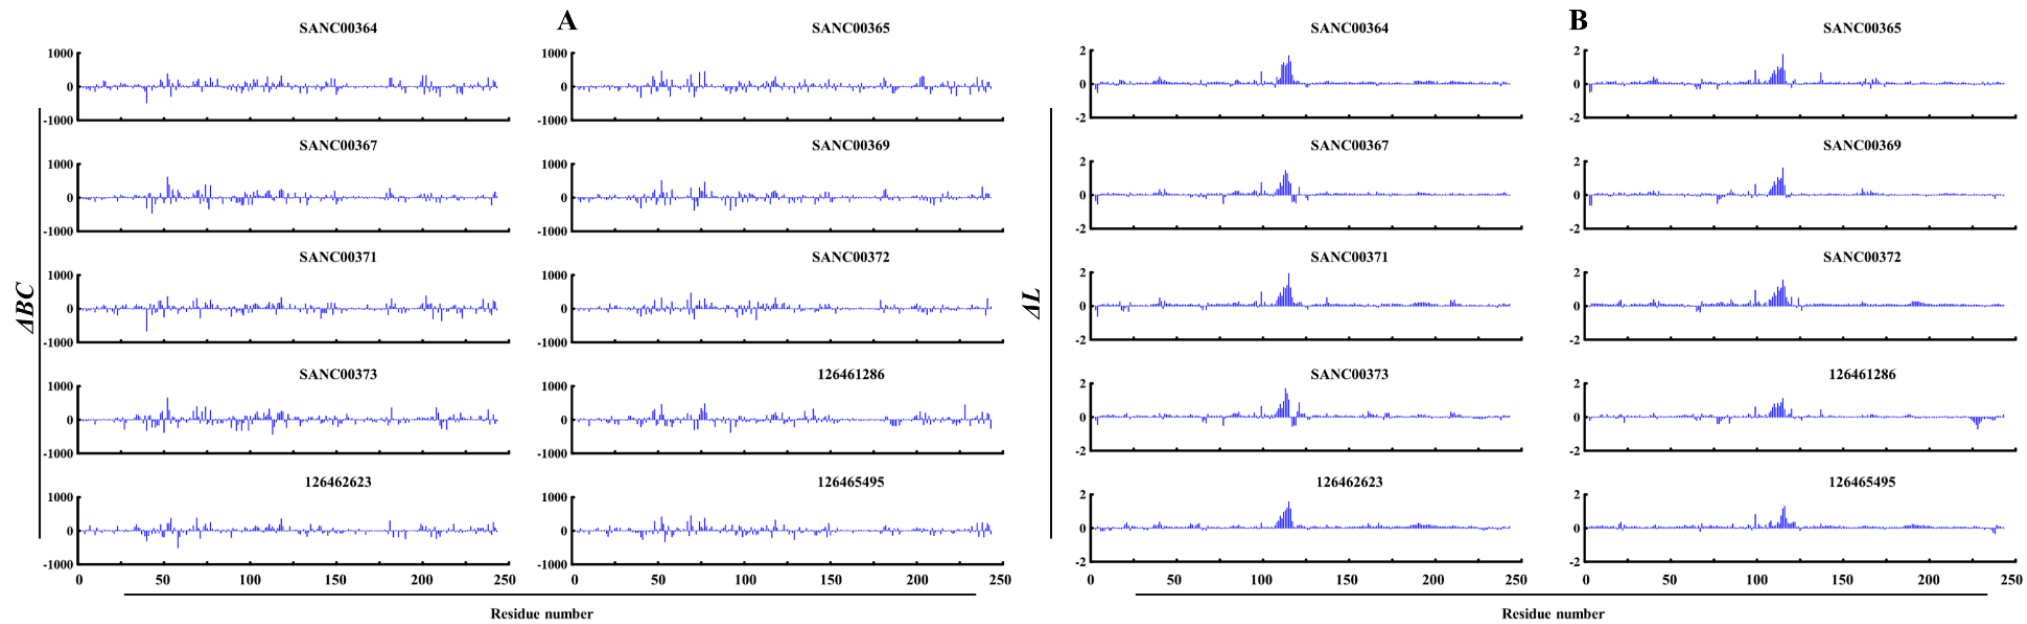

323

324 **Figure S31:** Plots showing FP-3 residues with significant changes in *average* a)  $BC$  and B)  $L$  upon ligand binding.

325

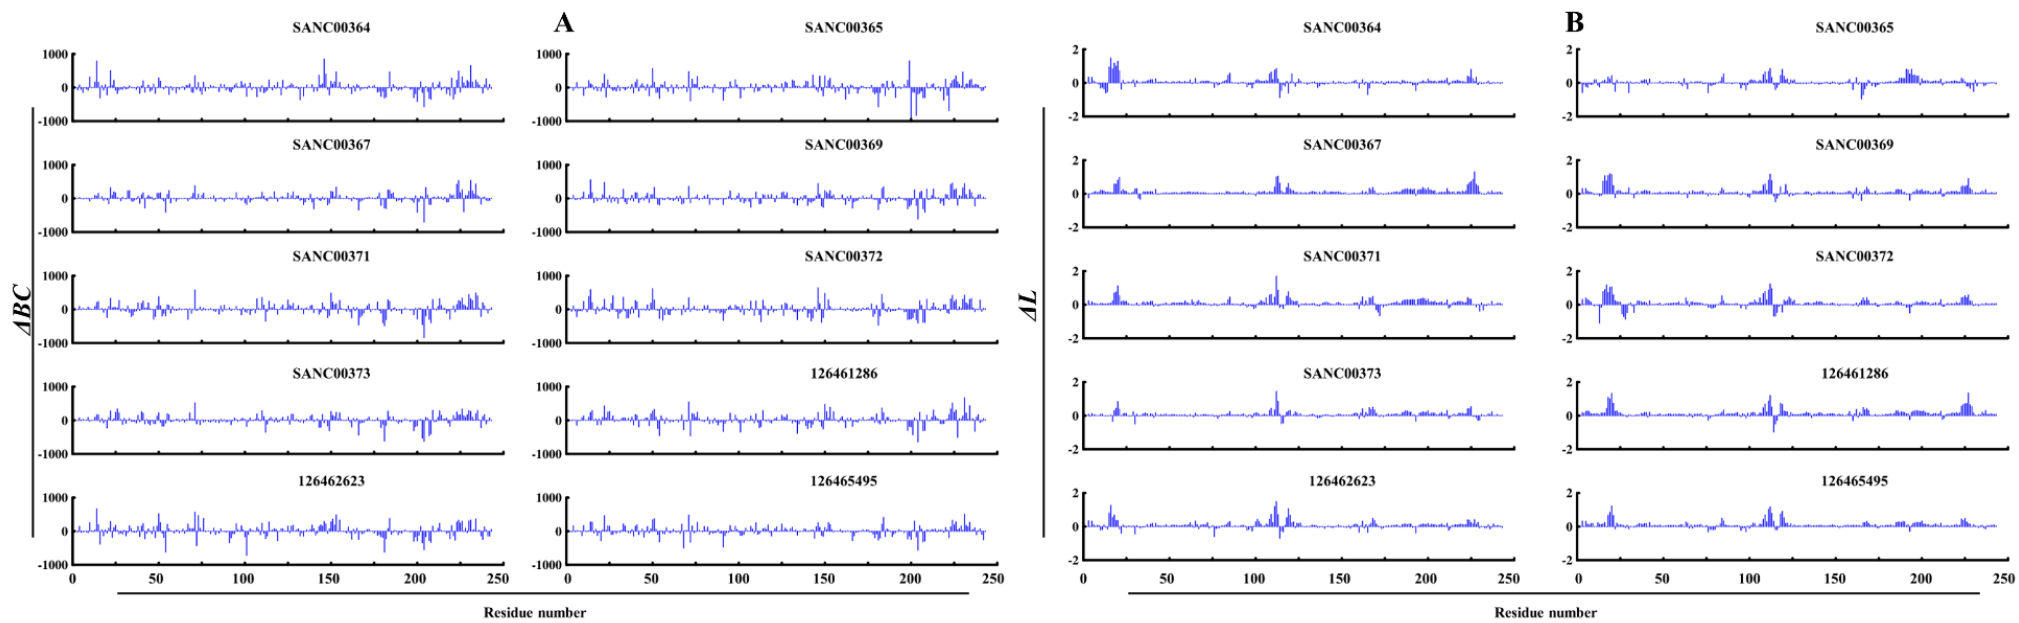

326

327 **Figure S32:** Plots showing VP-2 residues with significant changes in average a)  $BC$  and B)  $L$  upon ligand binding.

328

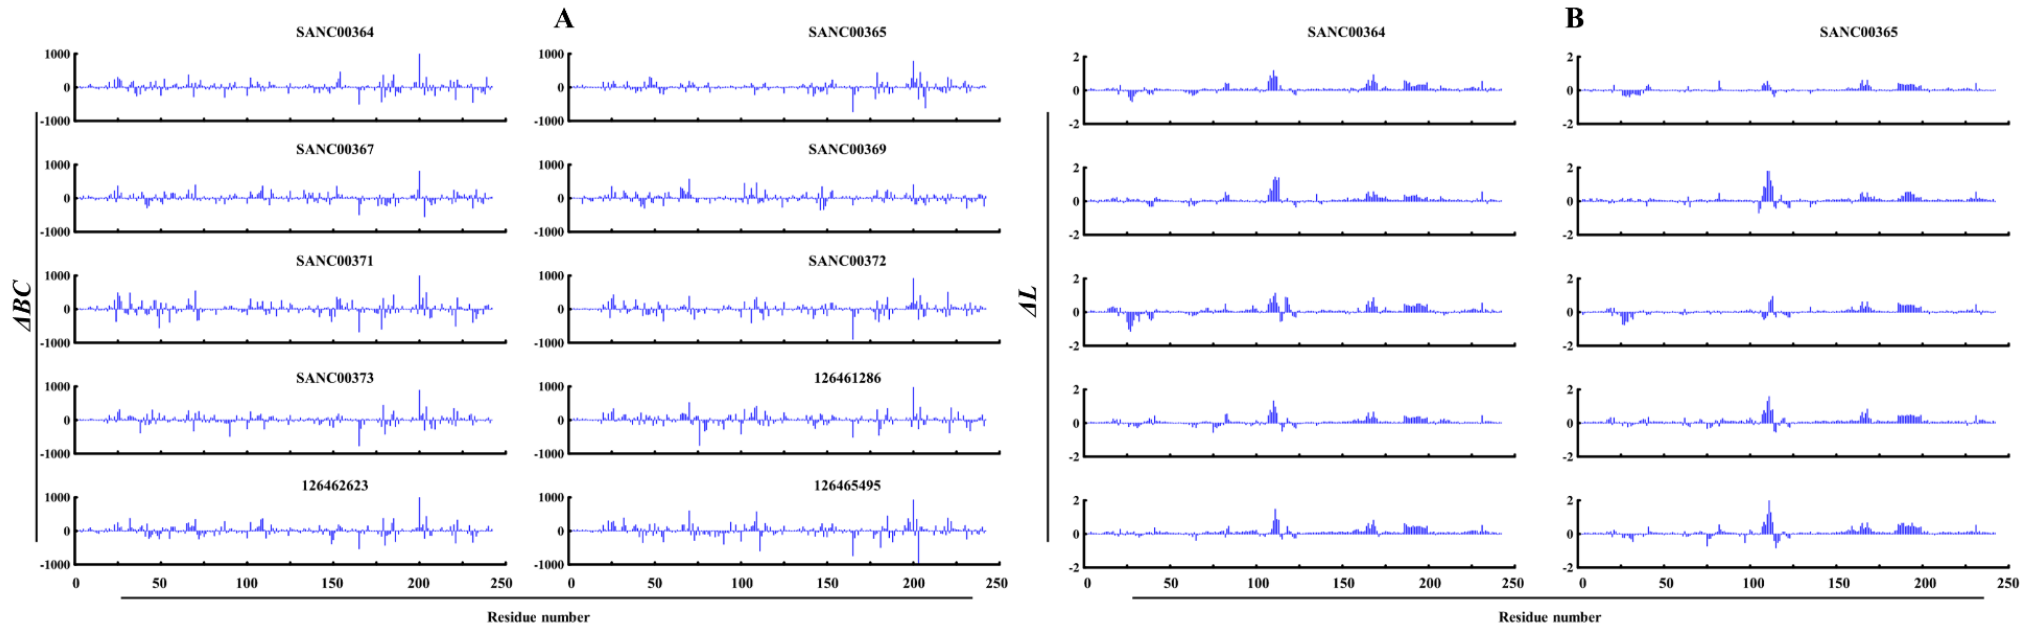

329

330 **Figure S33:** Plots showing VP-3 residues with significant changes in average a)  $BC$  and B)  $L$  upon ligand binding.

331

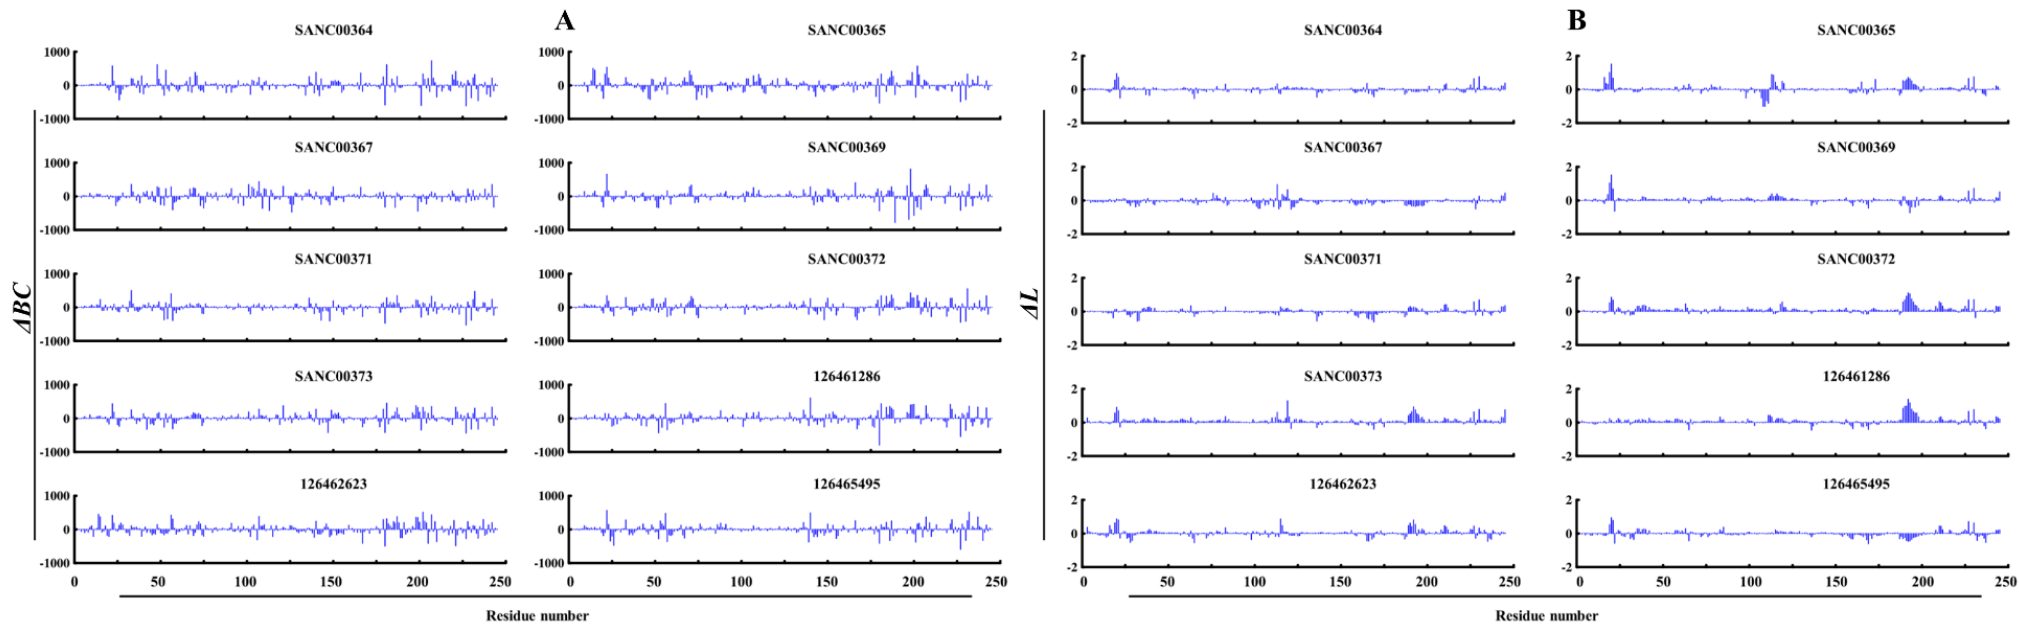

332

333 **Figure S34:** Plots showing KP-2 residues with significant changes in *average* a)  $BC$  and B)  $L$  upon ligand binding.

334

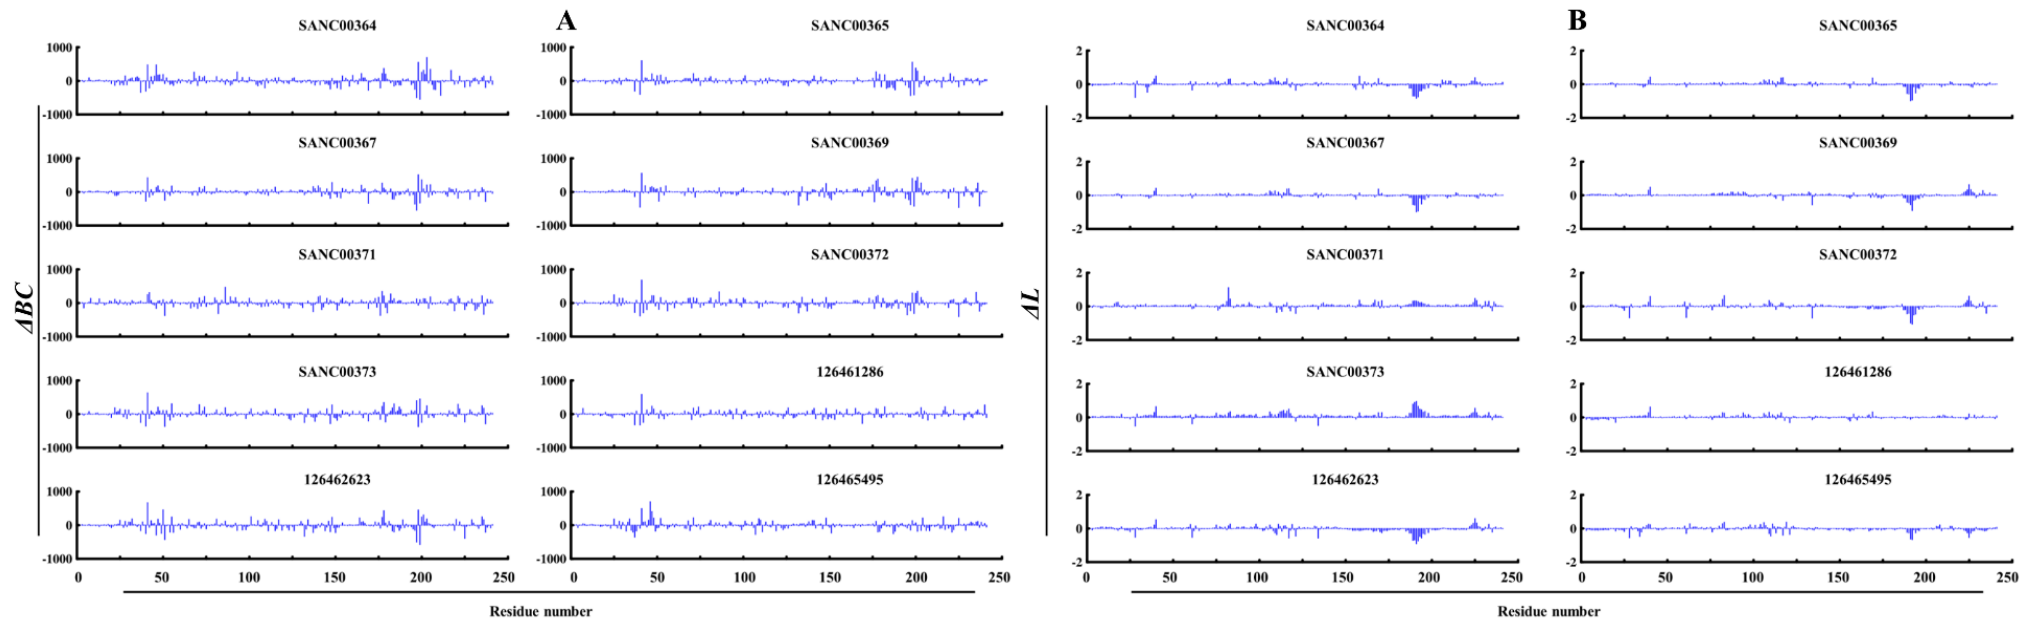

335

336 **Figure S35:** Plots showing KP-3 residues with significant changes in *average* a)  $BC$  and B)  $L$  upon ligand binding.

337



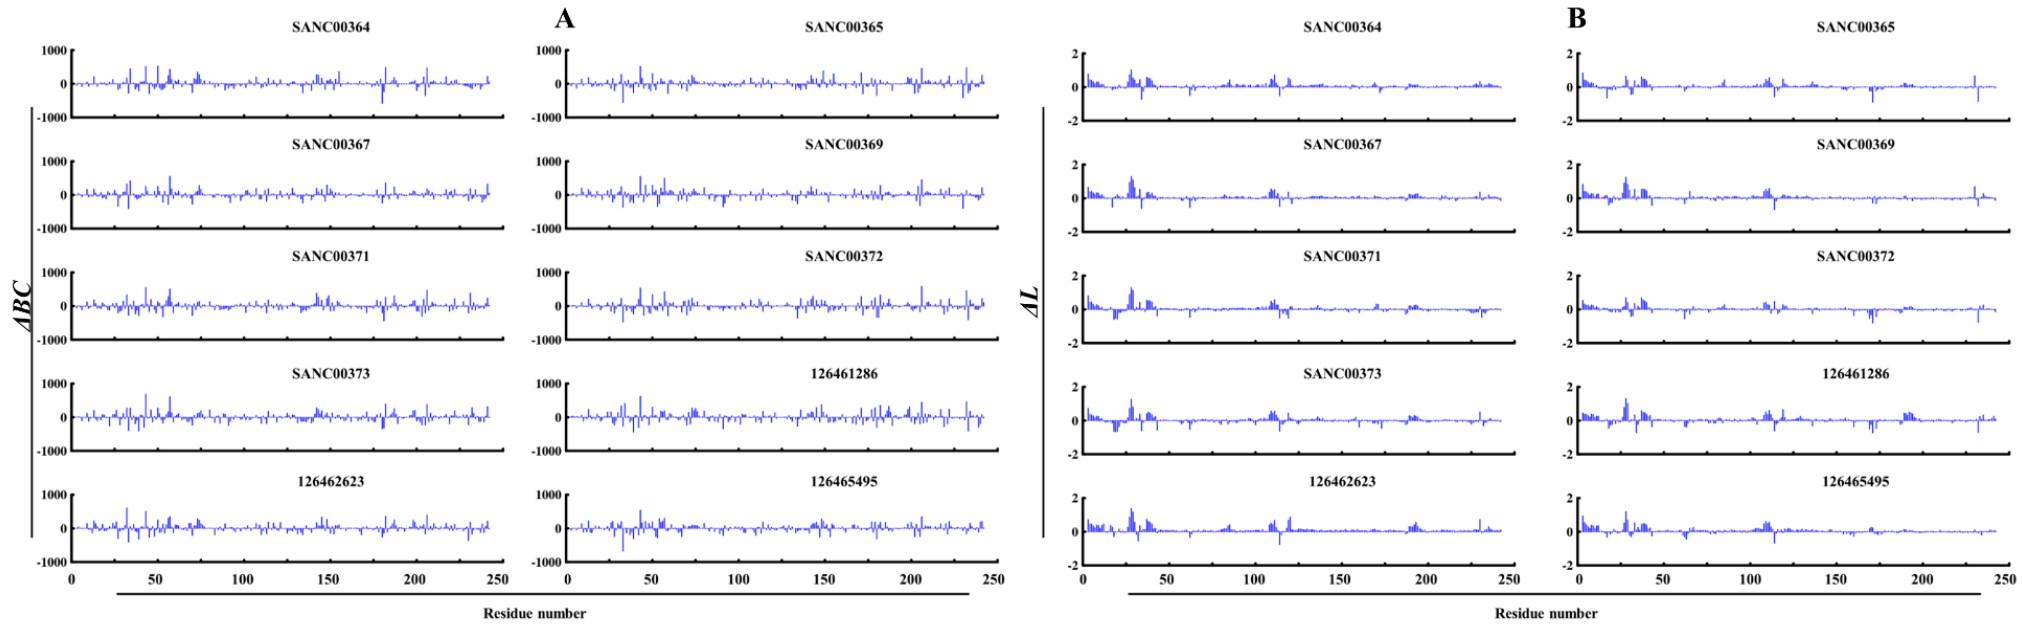

338

339 **Figure S36:** Plots showing BP-2 residues with significant changes in *average* a)  $BC$  and B)  $L$  upon ligand binding.

340

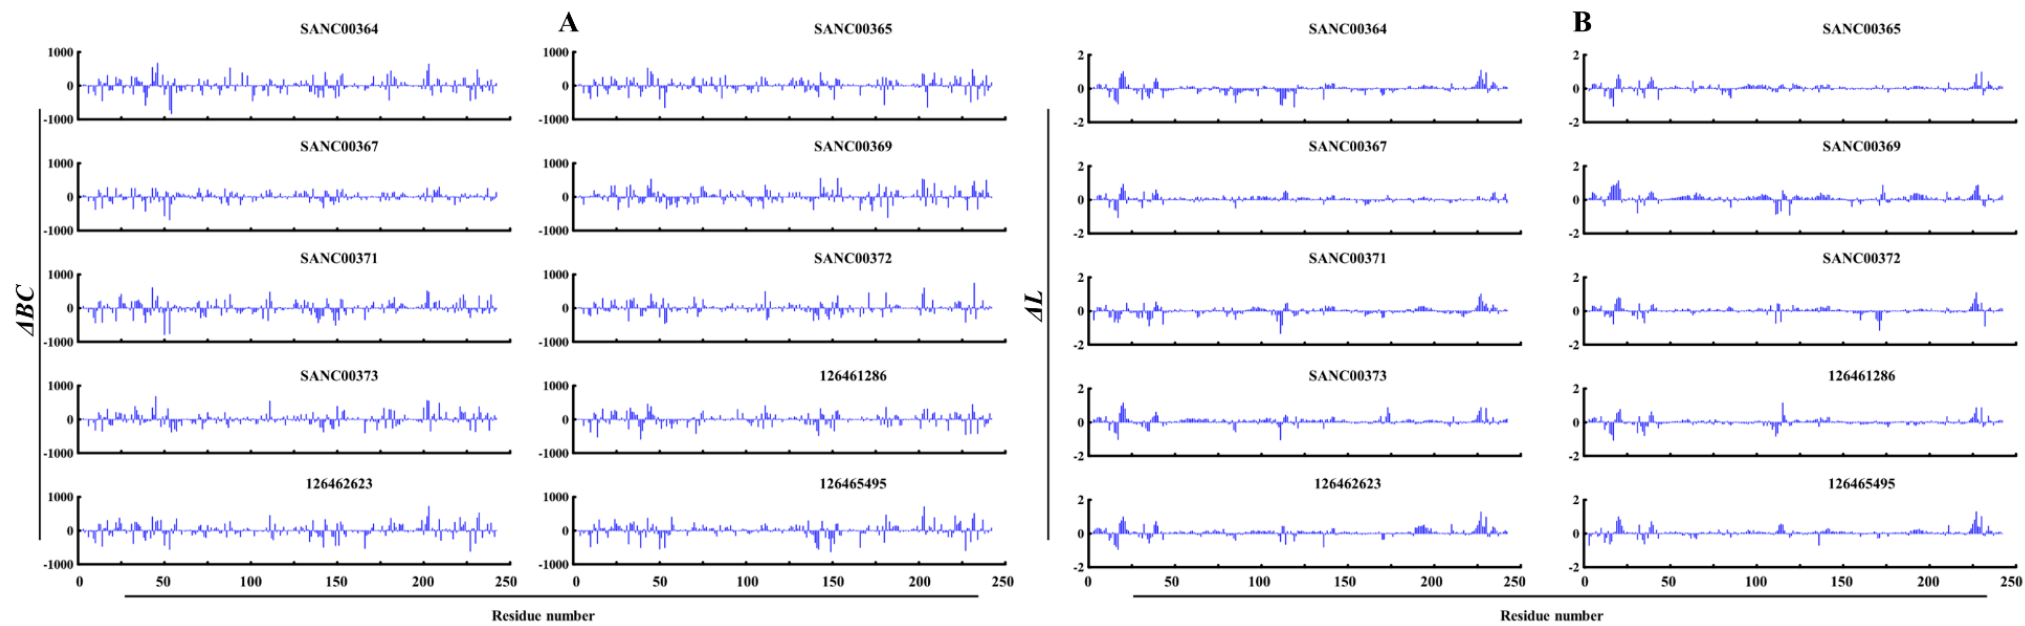

341

342 **Figure S37:** Plots showing CP-2 residues with significant changes in *average* a)  $BC$  and B)  $L$  upon ligand binding.

343

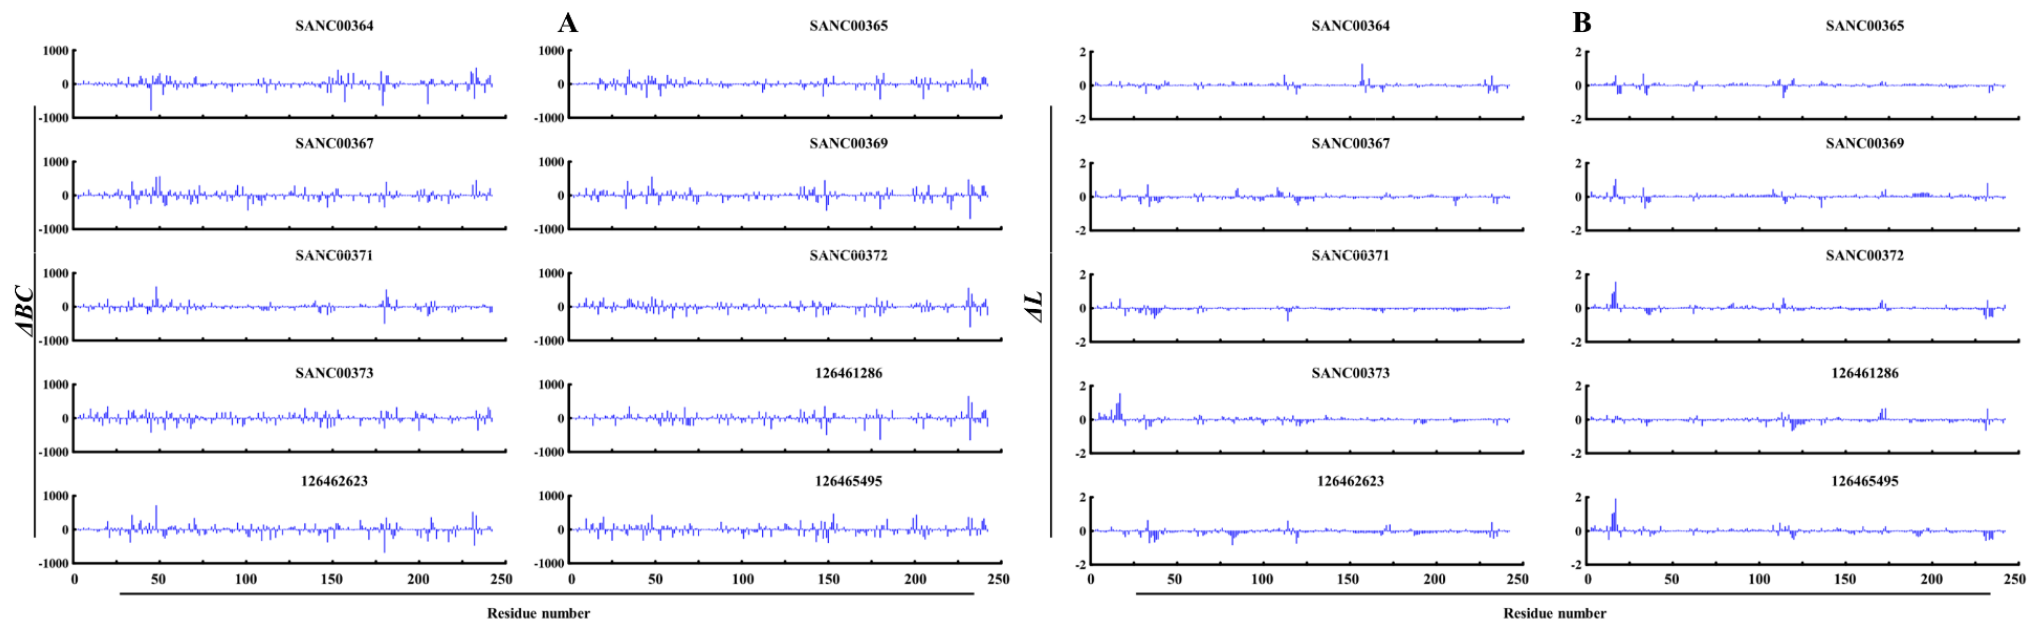

344

345 **Figure S38:** Plots showing YP-2 residues with significant changes in *average* a)  $BC$  and B)  $L$  upon ligand binding.

346

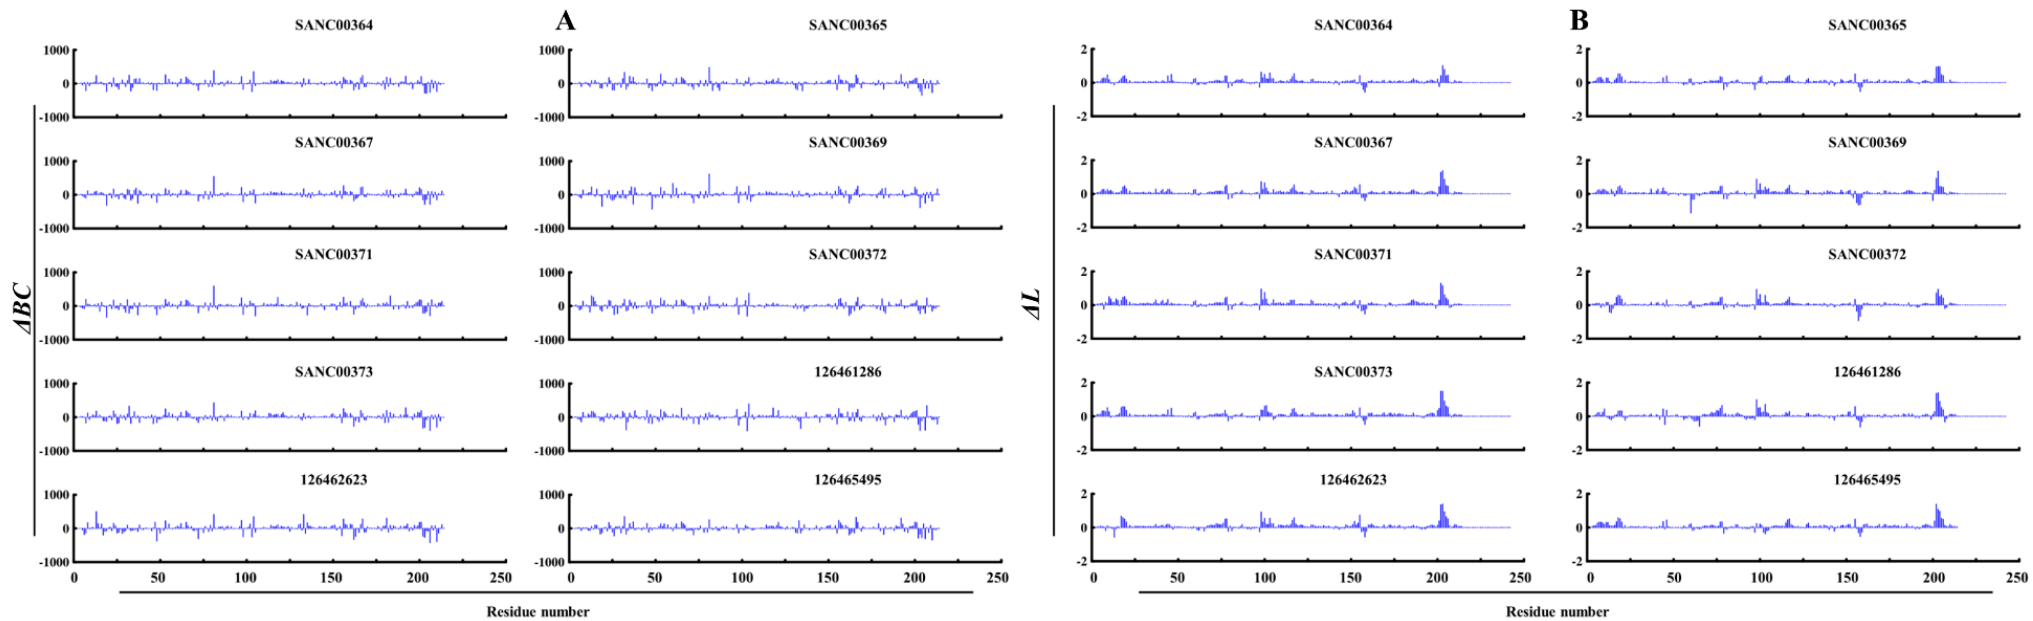

347

348 **Figure S39:** Plots showing Cat-K residues with significant changes in *average a) BC and B) L* upon ligand binding.

349

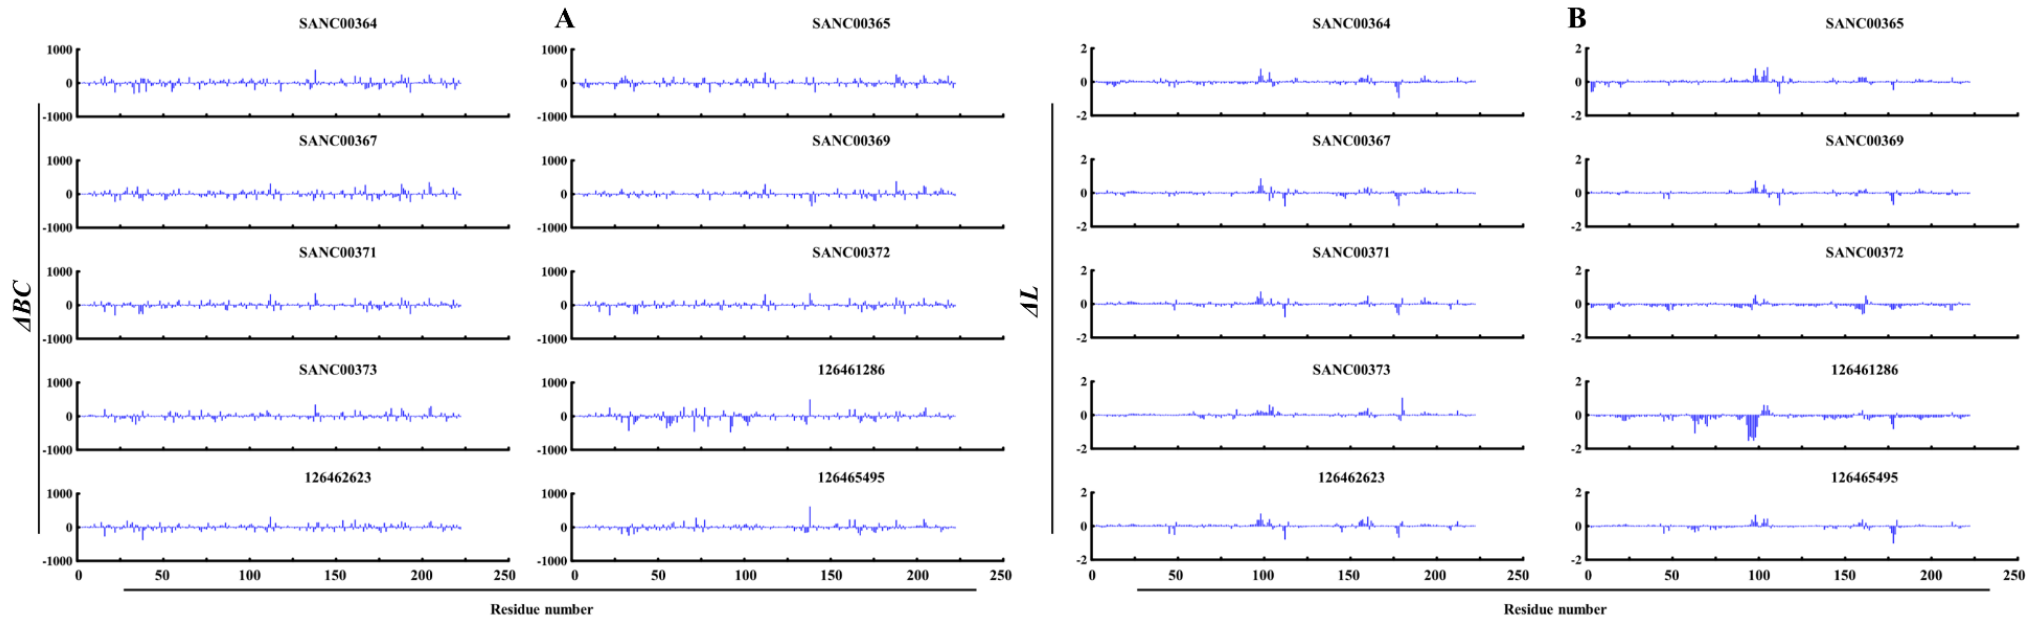

350

351 **Figure S40:** Plots showing Cat-L residues with significant changes in *average* a) *BC* and B) *L* upon ligand binding.

352

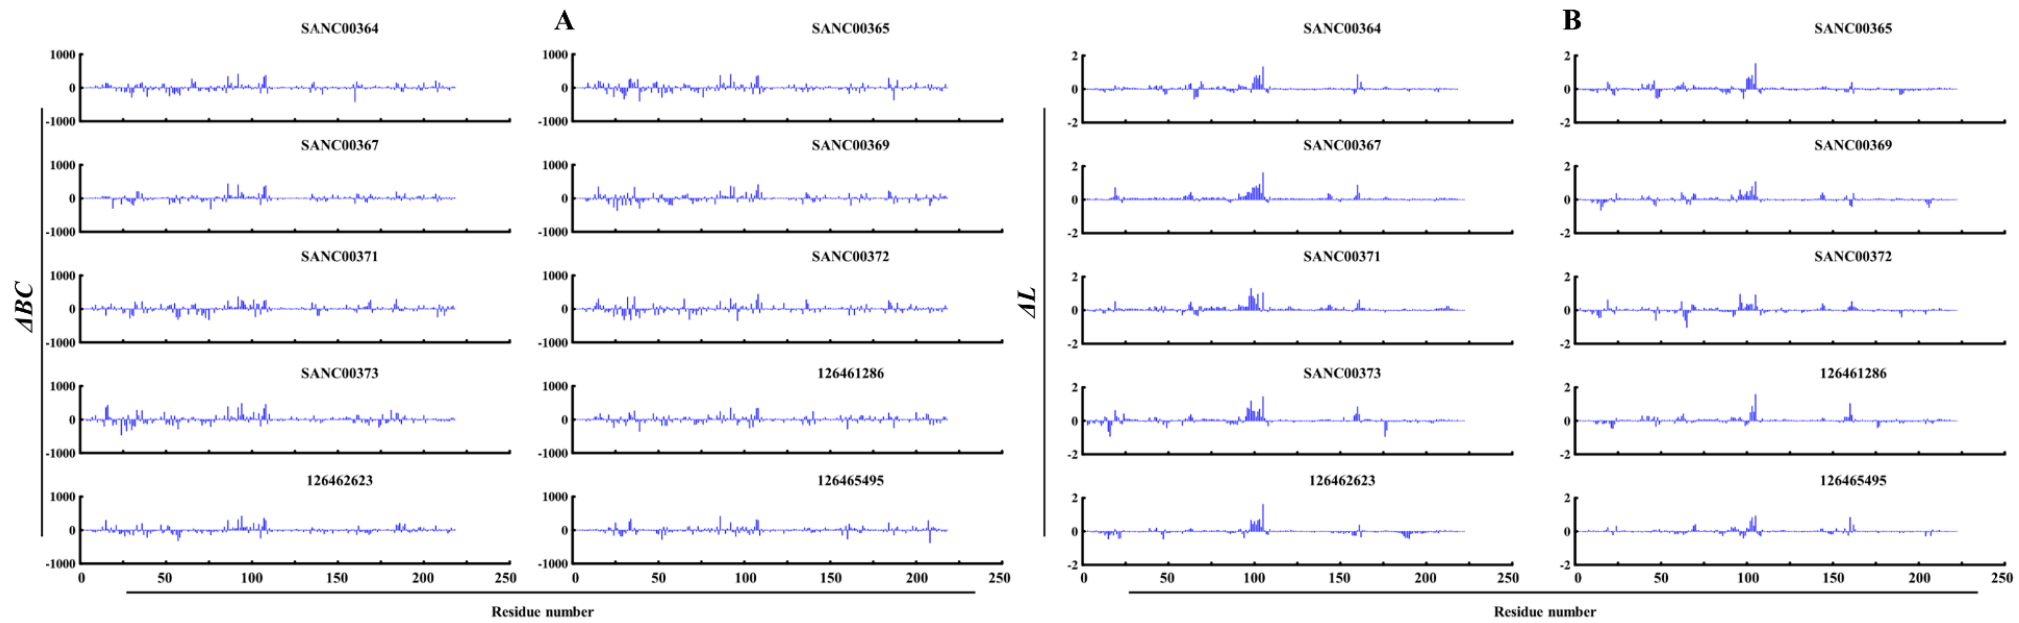

353

354 **Figure S41:** Plots showing Cat-S residues with significant changes in *average* a) *BC* and B) *L* upon ligand binding.

355

356

357

358

359

360

361

362

363 **Table S1.** Position of the catalytic domain of all proteins used and the corresponding domain numbering.

| <b>Protein</b> | <b>Position in whole sequence</b> | <b>Catalytic domain numbering</b> | <b>Sequence accession number</b> | <b>PDB ID</b> |
|----------------|-----------------------------------|-----------------------------------|----------------------------------|---------------|
| <b>FP-2</b>    | 244-484                           | 1-243                             | PF3D7_1115700                    | 2OUL          |
| <b>FP-3</b>    | 250-492                           | 1-242                             | PF3D7_1115400                    | 3BWK          |
| <b>VP-2</b>    | 246-487                           | 1-242                             | PVX_091415                       | -             |
| <b>VP-3</b>    | 253-493                           | 1-241                             | PVX_091410                       | -             |
| <b>KP-2</b>    | 252-495                           | 1-244                             | PKH_091250                       | -             |
| <b>KP-3</b>    | 240-479                           | 1-240                             | PKH_091260                       | -             |
| <b>BP-2</b>    | 228-468                           | 1-241                             | PBANKA_093240                    | -             |
| <b>CP-2</b>    | 231-471                           | 1-241                             | PCHAS_091190                     | -             |
| <b>YP-2</b>    | 232-472                           | 1-241                             | PY00783                          | -             |
| <b>Cat-K</b>   | 115-329                           | 1-215                             | gi   157830076                   | 3OVZ          |
| <b>Cat-L</b>   | 113-333                           | 1-221                             | gi   313754424                   | 3OF8          |
| <b>Cat-S</b>   | 115-331                           | 1-217                             | gi   30749675                    | 1NPZ          |

364

365

366

367

368

369

370

371

372

373

374 **Table S2.** Residue interaction fingerprint between the different proteins and ligands. Shown in red, pink, green and cyan are residues interacting  
 375 with S1, S2, S3 and S1' respectively. In black represent non-subsite residues. Residues are numbered according to the catalytic domain (**Table**  
 376 **S1**).

|                                           | <b>Protein</b>                                                      | <b>S1, S2,S3, S1' and non-subsite interactions</b>                  |
|-------------------------------------------|---------------------------------------------------------------------|---------------------------------------------------------------------|
| S<br>A<br>N<br>C<br>0<br>0<br>3<br>6<br>4 | FP-2                                                                | C39,G40,A157,H174,W206,D35,C42,K37,N38,G171,S205,W210               |
|                                           | FP-3                                                                | Q38,G42,Y83,A159,H176,W208,D37,A39,L40,D211,W212                    |
|                                           | VP-2                                                                | Q37,Y82,A158,H175,W207,D36,A38,N39,S210,W211                        |
|                                           | VP-3                                                                | C39,G40,D81,V157,H174,W206,S205,W210                                |
|                                           | KP-2                                                                | Q37,C81,D82,T158,H175,W207,C43                                      |
|                                           | KP-3                                                                | G39,C79,D80,A156,H173,W205,D34,S208,W209                            |
|                                           | BP-2                                                                | Q37,E158,W207,D36,S206,D210,W211                                    |
|                                           | CP-2                                                                | Q37,C40,Q158,H175,W207,D36,K38,A210,W211                            |
|                                           | YP-2                                                                | Q37,C40,A41,E158,H175,W207,D36,Q38,K39,C43                          |
|                                           | Cat-K                                                               | Q19,C22,G23,Q143,H162,W184,N18,S24,C25,N187                         |
| Cat-L                                     | Q20,C23,G24,N67,H164,W190N19,W27,S189,E193,W194                     |                                                                     |
| Cat-S                                     | Q19,G23,R141,F146,H164,W186,Y18,A185,N189,F190                      |                                                                     |
| S<br>A<br>N<br>C<br>0<br>0<br>3<br>6<br>5 | FP-2                                                                | Q36,C39,G40,A157,H174,W206,D35,K37,N38,G171,S205,Q209,W210          |
|                                           | FP-3                                                                | Q38,G42,Y83,A159,H176,W208,D37,A39,L40,C44,D211,W212                |
|                                           | VP-2                                                                | Q37,Y82,A158,H175,W207,D36,A38,N39,S210,W211                        |
|                                           | VP-3                                                                | C39,G40,D81,V157,H174,W206,S205,W210                                |
|                                           | KP-2                                                                | Q37,C81,D82,A153,T158,H175,W207,C43                                 |
|                                           | KP-3                                                                | Q35,C79,D80,A156,H173,W205,D34,W209                                 |
|                                           | BP-2                                                                | Q37,E158,W207,D36,S206,D210,W211                                    |
|                                           | CP-2                                                                | Q37,C40,Q158,H175,W207,D36,K38,A210,W211                            |
|                                           | YP-2                                                                | Q37,C40,A41,E158,H175,W207,D36,Q38,K39,C43                          |
|                                           | Cat-K                                                               | Q19,C22,G23,Q143,H162,W184,N18,S24,C25,N187                         |
| Cat-L                                     | Q20,C23,G24,N67,H164,W190N19,W27,S189,E193,W194                     |                                                                     |
| Cat-S                                     | Q19,G23,C66,R141,F146,H164,W186,Y18,A185,N189,F190                  |                                                                     |
| S<br>A<br>N<br>C<br>0<br>3                | FP-2                                                                | Q36,C39,G40,N173,G82,G83,A157,H174,W206,D35,K37,N38,G171,Q209,W210  |
|                                           | FP-3                                                                | Q38,G42,Y83,N175,G84,G85,A159,H176,W208,D37,A39,L40,D211,W212       |
|                                           | VP-2                                                                | Q37,C40,Y82,N174,G83,G84,V153,A158,H175,W207,D36,A38,N39,W211       |
|                                           | VP-3                                                                | Q36,C39,D81,N173,G82,G83,A152,V157,H174,W206,K37,N38,W43,S205,W210  |
|                                           | KP-2                                                                | Q37,C81,D82,N174,A176,G83,G84,I151,A153,N154,T158,H175,W207,C43,A45 |
|                                           | KP-3                                                                | Q35,C38,D80,N172,G81,A156,H173,W205,D34,G36,S204,S208,W209          |
| BP-2                                      | Q37,C40,A41,G83,G84,N174,V153,D154,E158,W207,D36,Q38,K39,D210,W211  |                                                                     |
| CP-2                                      | Q37,C40,A41,A173,N174,G83,G84,Q158,H175,W207,D36,R39,S206,A210,W211 |                                                                     |



|                                           |       |                                                                              |
|-------------------------------------------|-------|------------------------------------------------------------------------------|
| 6                                         | YP-2  | Q37,C40,A41,A173,N174,G83,G84,V153,E158,H175,W207,D36,Q38,K39,Y172           |
| 7                                         | Cat-K | Q19,C22,G64,N161,G65,G66,Q143,H162,W184,N18,G20,Q21,S24,N187,W188            |
|                                           | Cat-L | Q20,C23,G24,N67,D163,G68,G69,H164,W190,N19,G21,Q22,W27,E193,W194             |
|                                           | Cat-S | Q19,G23,N67,N163,G68,R141,F146,H164,W186,Y18,G20,C25,N189,F190               |
| S<br>A<br>N<br>C<br>0<br>0<br>3<br>6<br>9 | FP-2  | Q36,C39,G40,N173,G82,G83,A157,H174,W206,D35,K37,N38,C42,S205,Q209,W210       |
|                                           | FP-3  | Q38,C41,Y83,N175,G84,G85,A159,H176,W208,D37,A39,L40,C44,D211,W212            |
|                                           | VP-2  | Q37,C40,G41,Y82,N174,G83,G84,V153,H175,W207,D36,A38,N39,C43,S210,W211        |
|                                           | VP-3  | Q36,C39,G40,D81,N173,G82,G83,A152,V157,H174,W206,K37,N38,C42,W43,S205,W210   |
|                                           | KP-2  | Q37,C81,D82,N174,A176,G83,G84,I151,A153,T158,H175,W207,C43,W44               |
|                                           | KP-3  | Q35,C38,G39,C79,D80,N172,G81,A156,H173,W205,D34,G36,C41,S204,S208,W209       |
|                                           | BP-2  | Q37,N174,G83,G84,V153,D154,W207,D36,Q38,K39,D155,D210,W211                   |
|                                           | CP-2  | Q37,C40,A41,A173,N174,G83,G84,Q158,H175,W207,D36,K38,R39,A210,W211           |
|                                           | YP-2  | Q37,C40,A41,A173,N174,G83,G84,V153,H175,W207,D36,Q38,K39,C43,Y172            |
|                                           | 9     | Cat-K                                                                        |
| Cat-L                                     |       | Q20,C23,G24,N67,D163,G68,G69,H164,W190,N19,G21,Q22,C26,W27,S189,E193,W194    |
| Cat-S                                     |       | Q19,G23,C66,N67,N163,G68,R141,F146,H164,W186,Y18,G20,C25,A185,N189,F190      |
| S<br>A<br>N<br>C<br>0<br>0<br>3<br>7<br>1 | FP-2  | Q36,C39,G40,N173,G82,G83,H174,W206,D35,K37,N38,C42,S205,Q209,W210            |
|                                           | FP-3  | Q38,C41,G42,Y83,N175,G84,G85,A159,H176,W208,D37,A39,L40,C44,D211,W212        |
|                                           | VP-2  | Q37,C40,G41,Y82,N174,G83,G84,V153,H175,W207,D36,A38,N39,S206,S210,W211       |
|                                           | VP-3  | Q36,C39,G40,D81,N173,G82,G83,A152,V157,H174,W206,K37,N38,W43,S205,W210       |
|                                           | KP-2  | Q37,C81,D82,N174,A176,G83,G84,N154,T158,H175,W207,C43,A45                    |
|                                           | KP-3  | Q35,C38,G39,C79,D80,N172,G81,A156,H173,W205,D34,G36,C41,S204,S208,W209       |
|                                           | BP-2  | Q37,C40,A41,N174,G83,G84,V153,D154,E158,W207,D36,Q38,K39,T170,S206,D210,W211 |
|                                           | CP-2  | Q37,C40,A41,A173,N174,G83,G84,Q158,H175,W207,D36,K38,R39,C43,S206,A210,W211  |
|                                           | YP-2  | Q37,C40,A41,I85,A173,N174,G83,G84,V153,E158,H175,W207,D36,Q38,K39,C43,Y172   |
|                                           | 1     | Cat-K                                                                        |
| Cat-L                                     |       | Q20,C23,G24,N67,D163,G68,G69,H164,W190,N19,G21,Q22,S189,E193,W194            |
| Cat-S                                     |       | Q19,G23,C66,N67,N163,G68,R141,F146,H164,W186,Y18,G20,C25,A185,N189,F190      |
| S<br>A<br>N<br>C<br>0<br>0<br>3<br>7<br>2 | FP-2  | Q36,C39,G40,N173,G82,G83,A157,H174,W206,D35,K37,N38,C42,G171,S205,Q209,W210  |
|                                           | FP-3  | Q38,C41,G42,Y83,N175,G84,G85,A159,H176,W208,D37,A39,L40,C44,D211,W212        |
|                                           | VP-2  | Q37,C40,G41,Y82,N174,G83,G84,V153,A158,H175,W207,D36,A38,S206,S210,W211      |
|                                           | VP-3  | Q36,C39,G40,D81,N173,G82,G83,A152,V157,H174,W206,K37,N38,W43,S205,W210       |
|                                           | KP-2  | Q37,C81,D82,N174,A176,G83,G84,I151,A153,N154,T158,H175,W207,C43,W44,A45      |
|                                           | KP-3  | Q35,C38,G39,C79,D80,N172,G81,A156,H173,W205,D34,G36,C41,S204,S208,W209       |
|                                           | BP-2  | Q37,A41,N174,G83,G84,V153,D154,E158,W207,D36,Q38,K39,D155,S206,D210,W211     |
| 7                                         | CP-2  | Q37,C40,A41,A173,N174,G83,G84,Q158,H175,W207,D36,K38,R39,C43,S206,A210,W211  |
| 2                                         | YP-2  | Q37,C40,A41,I85,A173,N174,G83,G84,V153,E158,H175,W207,D36,Q38,K39,C43,Y172   |

|                                           |       |                                                                                                       |
|-------------------------------------------|-------|-------------------------------------------------------------------------------------------------------|
|                                           | Cat-K | Q19,C22,G23,G64,N161,G65,G66,Q143,H162,W184,N18,G20,Q21,S24,C25,N187,W188                             |
|                                           | Cat-L | Q20,C23,G24,N67,D163,G68,G69,H164,W190,N19,G21,Q22,C26,W27,S189,E193,W194                             |
|                                           | Cat-S | Q19,G23,C66,N67,N163,G68,R141,F146,H164,W186,Y18,G20,C25,A185,N189,F190                               |
| S<br>A<br>N<br>C<br>0<br>0<br>3<br>7<br>3 | FP-2  | Q36,C39,G40,N173,G82,G83,A157,H174,W206,D35,K37,N38,C42,G171,S205,Q209,W210                           |
|                                           | FP-3  | Q38,C41,G42,Y83,N175,G84,G85,A159,H176,W208,D37,A39,L40,C44,D211,W212                                 |
|                                           | VP-2  | Q37,C40,G41,Y82,N174,G83,G84,V153,A158,H175,W207,D36,A38,N39,R161,S206,S210,W211                      |
|                                           | VP-3  | Q36,C39,G40,D81,N173,G82,G83,A152,V157,H174,W206,K37,N38,C42,W43,S205,W210                            |
|                                           | KP-2  | Q37,C81,D82,N174,A176,G83,G84,I151,A153,N154,T158,H175,W207,C43                                       |
|                                           | KP-3  | Q35,C38,G39,C79,D80,N172,G81,A156,H173,W205,D34,G36,C41,S204,S208,W209                                |
|                                           | BP-2  | Q37,C40,A41,N174,G83,G84,V153,D154,E158,W207,D36,Q38,K39,D155,T170,S206,D210,W211                     |
|                                           | CP-2  | Q37,C40,A41,A173,N174,G83,G84,Q158,H175,W207,D36,K38,R39,C43,S206,A210,W211                           |
|                                           | YP-2  | Q37,C40,A41,I85,A173,N174,G83,G84,V153,E158,H175,W207,D36,Q38,K39,C43,Y172                            |
|                                           |       | Cat-K                                                                                                 |
|                                           | Cat-L | Q20,C23,G24,N67,D163,G68,G69,H164,W190,N19,G21,Q22,C26,W27,S189,E193,W194                             |
|                                           | Cat-S | Q19,G23,C66,N67,N163,G68,R141,F146,H164,W186,Y18,G20,C25,A185,N189,F190                               |
| 1<br>2<br>6<br>4<br>6<br>1<br>2<br>8<br>6 | FP-2  | Q36,C39,G40,C80,N81,L84,I85,S149,L172,N173,A175,D234,G82,G83,V152,A157,H174,W206,D35,K37,C42,W43,D154 |
|                                           | FP-3  | Q38,C41,G42,C82,Y86,I87,S51,P174,N175,E236,G84,G85,A159,H176,W208,D37,A39,L40,C44,F160,R162           |
|                                           | VP-2  | Q37,C40,G41,Y82,N84,F85,S149,P173,N174,E235,T79,G83,G84,A158,H175,W207,A38,N39,C43,D44,D211           |
|                                           | VP-3  | Q36,C39,G40,D81,N84,S149,P172,N173,A175,Q234,Y78,G82,G83,V157,H174,W206,K37,N38,C42,W43,W210          |
|                                           | KP-2  | Q37,C40,G41,L85,S150,P173,N174,A176,E235,G83,G84,I151,T158,H175,W207,D36,K38,N39,C43,W44,K210         |
|                                           | KP-3  | Q35,C38,G39,D80,F83,N148,T171,N172,A174,E233,G81,G82,A156,H173,W205,D34,G36,D37,C41,W42,D153,S204     |
|                                           | BP-2  | Q37,C40,A41,E82,I85,L86,A150,A173,N174,A176,F79,G83,G84,V151,V153,E158,W207,Q38,C43,W44,W211          |
|                                           | CP-2  | Q37,C40,A41,E82,I85,L86,A150,A173,N174,A176,G83,G84,A153,S154,Q158,H175,W207,C43,D44,E155,F157        |
|                                           | YP-2  | Q37,C40,A41,D82,I85,A150,A173,N174,A176,F79,G83,G84,V151,E158,H175,W207,D36,Q38,K39,C43,W44,Y172      |
|                                           |       | Cat-K                                                                                                 |
|                                           | Cat-L | Q20,C23,G24,N67,L70,D163,G165,E64,G68,G69,L145,H164,W190,G21,Q22,C26,W27,W194                         |
|                                           | Cat-S | Q19,G23,C66,N67,F70,N163,V162,G165,G68,G69,V138,A140,R141,F146,H164,C25,W26,H142,P143                 |
| 1<br>2<br>6<br>4<br>6<br>2<br>6<br>2<br>3 | FP-2  | Q36,C39,G40,C80,N81,L84,I85,S149,L172,N173,A175,D234,G82,G83,V152,A157,H174,W206,K37,N38,C42,W43,D154 |
|                                           | FP-3  | Q38,C41,G42,C82,Y86,I87,S51,P174,N175,E236,G84,G85,A159,H176,W208,D37,A39,L40,C44,F160,R162           |
|                                           | VP-2  | Q37,C40,G41,Y82,F85,S149,P173,N174,E235,T79,G83,G84,A158,H175,W207,A38,N39,C43,D44,D211               |
|                                           | VP-3  | Q36,C39,G40,D81,N84,S149,P172,N173,A175,Q234,Y78,G82,G83,V157,H174,W206,K37,N38,C42,W43,W210          |
|                                           | KP-2  | Q37,C40,G41,L85,S150,P173,N174,A176,E235,G83,G84,I151,T158,H175,W207,D36,K38,N39,C43,W44,K210         |
|                                           | KP-3  | Q35,C38,G39,D80,F83,N148,T171,N172,A174,E233,G81,G82,A156,H173,W205,D34,G36,D37,C41,W42,D153,S204     |
|                                           | BP-2  | Q37,C40,A41,E82,I85,L86,A150,A173,N174,A176,F79,G83,G84,V151,V153,E158,W207,Q38,C43,W44,W211          |
|                                           | CP-2  | Q37,C40,A41,E82,I85,L86,A150,A173,N174,A176,G83,G84,A153,S154,Q158,H175,W207,C43,D44,E155,F157        |
|                                           | YP-2  | Q37,C40,A41,D82,I85,A150,A173,N174,A176,F79,G83,G84,V151,E158,H175,W207,D36,Q38,K39,C43,W44,Y172      |
|                                           |       | Cat-K                                                                                                 |

|   |       |                                                                                                       |
|---|-------|-------------------------------------------------------------------------------------------------------|
|   | Cat-L | Q20,C23,G24,N67,L70,G68,G69,L145,H164,W190,G21,Q22,C26,W27,W194                                       |
|   | Cat-S | Q19,G23,C66,N67,F70,N163,G68,G69,V138,A140,R141,F146,H164,C25,W26,H142,P143                           |
| 1 | FP-2  | Q36,C39,G40,C80,N81,L84,I85,S149,L172,N173,A175,D234,G82,G83,V152,A157,H174,W206,D35,N38,C42,W43,D154 |
|   | FP-3  | Q38,C41,G42,C82,Y86,I87,S51,P174,N175,E236,G84,G85,A159,H176,W208,D37,A39,L40,C44,F160,R162           |
| 2 | VP-2  | Q37,C40,G41,Y82,N84,F85,S149,P173,N174,E235,T79,G83,G84,A158,H175,W207,A38,N39,C43,D44,D211           |
|   | VP-3  | Q36,C39,G40,D81,N84,S149,P172,N173,A175,Q234,Y78,G82,G83,V157,H174,W206,K37,N38,C42,W43,W210          |
| 6 | KP-2  | Q37,C40,G41,L85,S150,P173,N174,A176,E235,G83,G84,I151,T158,H175,W207,D36,K38,N39,C43,W44,K210         |
|   | KP-3  | Q35,C38,G39,D80,F83,N148,T171,N172,A174,E233,G81,G82,A156,H173,W205,D34,G36,D37,C41,W42,D153,S204     |
| 4 | BP-2  | Q37,C40,A41,E82,I85,L86,A150,A173,N174,A176,F79,G83,G84,V151,V153,E158,W207,Q38,C43,W44,W211          |
|   | CP-2  | Q37,C40,A41,E82,I85,L86,A150,A173,N174,A176,G83,G84,A153,S154,Q158,H175,W207,C43,D44,E155,F157        |
| 5 | YP-2  | Q37,C40,A41,D82,I85,A150,A173,N174,A176,F79,G83,G84,V151,E158,H175,W207,D36,Q38,K39,C43,W44,Y172      |
|   | Cat-K | Q19,C22,G23,C63,Y67,L160,N161,D61,G66,G65,Q143,H162,W184,G20,Q21,C25,D26,W188                         |
| 9 | Cat-L | Q20,C23,G24,N67,L70,D163,G165,E64,G68,G69,L145,H164,W190,G21,Q22,C26,W27,W194                         |
|   | Cat-S | Q19,G23,C66,N67,F70,N163,V162,G165,G68,G69,V138,A140,R141,F146,H164,C25,W26,H142,P143                 |

377

378

379

380

381

382

383

384

385

386

387

388 **Table S3.** RMSD distribution statistics. Apo and ligand bound RMSD means were compared using the z-test with  $\alpha = 0.05$  and a  $H_0$  of  $\mu_1 - \mu_2 =$   
389 0. The two-sample KS-test was used to compare the shapes of the distributions between the apo and ligand bound systems  $\mu =$  Mean,  $\sigma =$   
390 Standard deviation and  $\sigma^2 =$  Variance.

| Protein   | Ligand    | $\mu$ | $\sigma$ | $\sigma^2$ | Z-test   | P        | KS       | P        |
|-----------|-----------|-------|----------|------------|----------|----------|----------|----------|
| FP-2      | Apo       | 0.23  | 0.04     | 0.00E+00   | -        | -        | -        | -        |
|           | SANC00364 | 0.26  | 0.02     | 0.00E+00   | -154.62  | 0.00E+00 | 0.44     | 0.00E+00 |
|           | SANC00365 | 0.28  | 0.04     | 0.00E+00   | -183.30  | 0.00E+00 | 0.46     | 0.00E+00 |
|           | SANC00367 | 0.24  | 0.01     | 0.00E+00   | -81.74   | 0.00E+00 | 0.39     | 0.00E+00 |
|           | SANC00369 | 0.30  | 0.02     | 0.00E+00   | -206.21  | 0.00E+00 | 0.55     | 0.00E+00 |
|           | SANC00371 | 0.23  | 0.02     | 0.00E+00   | -64.90   | 0.00E+00 | 0.35     | 0.00E+00 |
|           | SANC00372 | 0.23  | 0.02     | 0.00E+00   | -46.98   | 0.00E+00 | 0.31     | 0.00E+00 |
|           | SANC00373 | 0.28  | 0.03     | 0.00E+00   | -218.92  | 0.00E+00 | 0.55     | 0.00E+00 |
|           | 126461286 | 0.24  | 0.02     | 0.00E+00   | -94.70   | 0.00E+00 | 0.39     | 0.00E+00 |
|           | 126462623 | 0.22  | 0.02     | 0.00E+00   | -13.80   | 0.00E+00 | 0.20     | 0.00E+00 |
| 126465495 | 0.23      | 0.02  | 0.00E+00 | -72.20     | 0.00E+00 | 0.35     | 0.00E+00 |          |
| FP-3      | Apo       | 0.21  | 0.03     | 0.00E+00   | -        | -        | -        | -        |
|           | SANC00364 | 0.25  | 0.02     | 0.00E+00   | -202.76  | 0.00E+00 | 0.52     | 0.00E+00 |
|           | SANC00365 | 0.24  | 0.02     | 0.00E+00   | -208.70  | 0.00E+00 | 0.59     | 0.00E+00 |
|           | SANC00367 | 0.24  | 0.02     | 0.00E+00   | -201.48  | 0.00E+00 | 0.60     | 0.00E+00 |
|           | SANC00369 | 0.24  | 0.01     | 0.00E+00   | -227.98  | 0.00E+00 | 0.66     | 0.00E+00 |
|           | SANC00371 | 0.24  | 0.02     | 0.00E+00   | -187.86  | 0.00E+00 | 0.51     | 0.00E+00 |
|           | SANC00372 | 0.22  | 0.01     | 0.00E+00   | -93.33   | 0.00E+00 | 0.30     | 0.00E+00 |
|           | SANC00373 | 0.25  | 0.01     | 0.00E+00   | -217.16  | 0.00E+00 | 0.62     | 0.00E+00 |
|           | 126461286 | 0.26  | 0.03     | 0.00E+00   | -231.8   | 0.00E+00 | 0.60     | 0.00E+00 |
|           | 126462623 | 0.23  | 0.01     | 0.00E+00   | -181.81  | 0.00E+00 | 0.57     | 0.00E+00 |
| 126465495 | 0.24      | 0.02  | 0.00E+00 | -168.71    | 0.00E+00 | 0.44     | 0.00E+00 |          |
| VP-2      | Apo       | 0.29  | 0.04     | 0.00E+00   | -        | -        | -        | -        |
|           | SANC00364 | 0.31  | 0.02     | 0.00E+00   | -91.98   | 0.00E+00 | 0.28     | 0.00E+00 |
|           | SANC00365 | 0.32  | 0.02     | 0.00E+00   | -178.04  | 0.00E+00 | 0.49     | 0.00E+00 |
|           | SANC00367 | 0.25  | 0.02     | 0.00E+00   | 60.4     | 0.00E+00 | 0.44     | 0.00E+00 |
| SANC00369 | 0.28      | 0.04  | 0.00E+00 | -3.5       | 0.00E+00 | 0.20     | 0.00E+00 |          |

|             |           |      |      |          |         |          |      |          |
|-------------|-----------|------|------|----------|---------|----------|------|----------|
|             | SANC00371 | 0.29 | 0.02 | 0.00E+00 | -21.14  | 0.00E+00 | 0.22 | 0.00E+00 |
|             | SANC00372 | 0.33 | 0.03 | 0.00E+00 | -116.97 | 0.00E+00 | 0.31 | 0.00E+00 |
|             | SANC00373 | 0.31 | 0.02 | 0.00E+00 | -87.62  | 0.00E+00 | 0.26 | 0.00E+00 |
|             | 126461286 | 0.25 | 0.02 | 0.00E+00 | 94.48   | 0.00E+00 | 0.48 | 0.00E+00 |
|             | 126462623 | 0.30 | 0.02 | 0.00E+00 | -54.51  | 0.00E+00 | 0.23 | 0.00E+00 |
|             | 126465495 | 0.27 | 0.02 | 0.00E+00 | 10.86   | 0.00E+00 | 0.34 | 0.00E+00 |
| <b>VP-3</b> | Apo       | 0.22 | 0.02 | 0.00E+00 | -       | -        | -    | -        |
|             | SANC00364 | 0.29 | 0.01 | 0.00E+00 | -464.45 | 0.00E+00 | 0.86 | 0.00E+00 |
|             | SANC00365 | 0.28 | 0.02 | 0.00E+00 | -415.64 | 0.00E+00 | 0.85 | 0.00E+00 |
|             | SANC00367 | 0.26 | 0.01 | 0.00E+00 | -360.13 | 0.00E+00 | 0.79 | 0.00E+00 |
|             | SANC00369 | 0.28 | 0.02 | 0.00E+00 | -393.7  | 0.00E+00 | 0.78 | 0.00E+00 |
|             | SANC00371 | 0.34 | 0.02 | 0.00E+00 | -532.2  | 0.00E+00 | 0.88 | 0.00E+00 |
|             | SANC00372 | 0.31 | 0.02 | 0.00E+00 | -488.58 | 0.00E+00 | 0.85 | 0.00E+00 |
|             | SANC00373 | 0.25 | 0.02 | 0.00E+00 | -234.22 | 0.00E+00 | 0.61 | 0.00E+00 |
|             | 126461286 | 0.28 | 0.01 | 0.00E+00 | -465.51 | 0.00E+00 | 0.87 | 0.00E+00 |
|             | 126462623 | 0.28 | 0.02 | 0.00E+00 | -379.77 | 0.00E+00 | 0.77 | 0.00E+00 |
|             | 126465495 | 0.28 | 0.02 | 0.00E+00 | -460.39 | 0.00E+00 | 0.89 | 0.00E+00 |
| <b>KP-2</b> | Apo       | 0.22 | 0.02 | 0.00E+00 | -       | -        | -    | -        |
|             | SANC00364 | 0.29 | 0.03 | 0.00E+00 | -360.35 | 0.00E+00 | 0.78 | 0.00E+00 |
|             | SANC00365 | 0.34 | 0.01 | 0.00E+00 | -578.07 | 0.00E+00 | 0.92 | 0.00E+00 |
|             | SANC00367 | 0.31 | 0.02 | 0.00E+00 | -474.26 | 0.00E+00 | 0.88 | 0.00E+00 |
|             | SANC00369 | 0.28 | 0.01 | 0.00E+00 | -379.45 | 0.00E+00 | 0.83 | 0.00E+00 |
|             | SANC00371 | 0.29 | 0.02 | 0.00E+00 | -350.32 | 0.00E+00 | 0.76 | 0.00E+00 |
|             | SANC00372 | 0.28 | 0.02 | 0.00E+00 | -320.62 | 0.00E+00 | 0.71 | 0.00E+00 |
|             | SANC00373 | 0.29 | 0.02 | 0.00E+00 | -388.11 | 0.00E+00 | 0.78 | 0.00E+00 |
|             | 126461286 | 0.29 | 0.02 | 0.00E+00 | -450.16 | 0.00E+00 | 0.86 | 0.00E+00 |
|             | 126462623 | 0.31 | 0.02 | 0.00E+00 | -482.63 | 0.00E+00 | 0.86 | 0.00E+00 |
|             | 126465495 | 0.29 | 0.02 | 0.00E+00 | -408.63 | 0.00E+00 | 0.81 | 0.00E+00 |
| <b>KP-3</b> | Apo       | 0.19 | 0.03 | 0.00E+00 | -       | -        | -    | -        |
|             | SANC00364 | 0.25 | 0.02 | 0.00E+00 | -343.66 | 0.00E+00 | 0.69 | 0.00E+00 |
|             | SANC00365 | 0.24 | 0.02 | 0.00E+00 | -306.66 | 0.00E+00 | 0.68 | 0.00E+00 |

|             |           |      |          |          |          |          |          |          |
|-------------|-----------|------|----------|----------|----------|----------|----------|----------|
|             | SANC00367 | 0.26 | 0.01     | 0.00E+00 | -367.48  | 0.00E+00 | 0.69     | 0.00E+00 |
|             | SANC00369 | 0.24 | 0.01     | 0.00E+00 | -309.22  | 0.00E+00 | 0.66     | 0.00E+00 |
|             | SANC00371 | 0.27 | 0.02     | 0.00E+00 | -429.2   | 0.00E+00 | 0.83     | 0.00E+00 |
|             | SANC00372 | 0.24 | 0.03     | 0.00E+00 | -438.07  | 0.00E+00 | 0.84     | 0.00E+00 |
|             | SANC00373 | 0.27 | 0.02     | 0.00E+00 | -359.83  | 0.00E+00 | 0.75     | 0.00E+00 |
|             | 126461286 | 0.25 | 0.02     | 0.00E+00 | -310.29  | 0.00E+00 | 0.64     | 0.00E+00 |
|             | 126462623 | 0.24 | 0.02     | 0.00E+00 | -463.81  | 0.00E+00 | 0.85     | 0.00E+00 |
|             | 126465495 | 0.30 | 0.02     | 0.00E+00 | -308.78  | 0.00E+00 | 0.63     | 0.00E+00 |
| <b>BP-2</b> | Apo       | 0.24 | 0.02     | 0.00E+00 | -        | -        | -        | -        |
|             | SANC00364 | 0.29 | 0.03     | 0.00E+00 | -301.03  | 0.00E+00 | 0.69     | 0.00E+00 |
|             | SANC00365 | 0.31 | 0.03     | 0.00E+00 | -337.42  | 0.00E+00 | 0.78     | 0.00E+00 |
|             | SANC00367 | 0.30 | 0.04     | 0.00E+00 | -222.28  | 0.00E+00 | 0.60     | 0.00E+00 |
|             | SANC00369 | 0.29 | 0.03     | 0.00E+00 | -232.34  | 0.00E+00 | 0.51     | 0.00E+00 |
|             | SANC00371 | 0.32 | 0.02     | 0.00E+00 | -479.61  | 0.00E+00 | 0.87     | 0.00E+00 |
|             | SANC00372 | 0.31 | 0.03     | 0.00E+00 | -403.39  | 0.00E+00 | 0.84     | 0.00E+00 |
|             | SANC00373 | 0.30 | 0.03     | 0.00E+00 | -342.86  | 0.00E+00 | 0.70     | 0.00E+00 |
|             | 126461286 | 0.32 | 0.02     | 0.00E+00 | -493.69  | 0.00E+00 | 0.89     | 0.00E+00 |
|             | 126462623 | 0.31 | 0.03     | 0.00E+00 | -327.49  | 0.00E+00 | 0.71     | 0.00E+00 |
| 126465495   | 0.29      | 0.03 | 0.00E+00 | -289.83  | 0.00E+00 | 0.69     | 0.00E+00 |          |
| <b>CP-2</b> | Apo       | 0.26 | 0.02     | 0.00E+00 | -        | -        | -        | -        |
|             | SANC00364 | 0.28 | 0.02     | 0.00E+00 | -110.76  | 0.00E+00 | 0.28     | 0.00E+00 |
|             | SANC00365 | 0.26 | 0.01     | 0.00E+00 | -21.04   | 0.00E+00 | 0.12     | 0.00E+00 |
|             | SANC00367 | 0.29 | 0.02     | 0.00E+00 | -409.57  | 0.00E+00 | 0.83     | 0.00E+00 |
|             | SANC00369 | 0.37 | 0.02     | 0.00E+00 | -198.16  | 0.00E+00 | 0.59     | 0.00E+00 |
|             | SANC00371 | 0.30 | 0.02     | 0.00E+00 | -209.55  | 0.00E+00 | 0.60     | 0.00E+00 |
|             | SANC00372 | 0.32 | 0.02     | 0.00E+00 | -243.35  | 0.00E+00 | 0.64     | 0.00E+00 |
|             | SANC00373 | 0.30 | 0.02     | 0.00E+00 | -126.52  | 0.00E+00 | 0.32     | 0.00E+00 |
|             | 126461286 | 0.29 | 0.04     | 0.00E+00 | -17.66   | 0.00E+00 | 0.16     | 0.00E+00 |
|             | 126462623 | 0.25 | 0.01     | 0.00E+00 | -15.73   | 0.00E+00 | 0.12     | 0.00E+00 |
| 126465495   | 0.25      | 0.02 | 0.00E+00 | -34.67   | 0.00E+00 | 0.17     | 0.00E+00 |          |
| <b>YP-2</b> | Apo       | 0.19 | 0.02     | 0.00E+00 | -        | -        | -        | -        |

|              |           |      |          |          |          |          |          |          |
|--------------|-----------|------|----------|----------|----------|----------|----------|----------|
|              | SANC00364 | 0.31 | 0.02     | 0.00E+00 | -583.12  | 0.00E+00 | 0.90     | 0.00E+00 |
|              | SANC00365 | 0.26 | 0.01     | 0.00E+00 | -647.93  | 0.00E+00 | 0.96     | 0.00E+00 |
|              | SANC00367 | 0.28 | 0.02     | 0.00E+00 | -615.2   | 0.00E+00 | 0.95     | 0.00E+00 |
|              | SANC00369 | 0.31 | 0.03     | 0.00E+00 | -615.81  | 0.00E+00 | 0.95     | 0.00E+00 |
|              | SANC00371 | 0.28 | 0.02     | 0.00E+00 | -562.32  | 0.00E+00 | 0.87     | 0.00E+00 |
|              | SANC00372 | 0.31 | 0.02     | 0.00E+00 | -487.67  | 0.00E+00 | 0.89     | 0.00E+00 |
|              | SANC00373 | 0.32 | 0.03     | 0.00E+00 | -437.87  | 0.00E+00 | 0.87     | 0.00E+00 |
|              | 126461286 | 0.29 | 0.01     | 0.00E+00 | -478.65  | 0.00E+00 | 0.78     | 0.00E+00 |
|              | 126462623 | 0.28 | 0.01     | 0.00E+00 | -465.45  | 0.00E+00 | 0.87     | 0.00E+00 |
|              | 126465495 | 0.32 | 0.03     | 0.00E+00 | -435.56  | 0.00E+00 | 0.89     | 0.00E+00 |
| <b>Cat-K</b> | Apo       | 0.23 | 0.02     | 0.00E+00 | -        | -        | -        | -        |
|              | SANC00364 | 0.22 | 0.02     | 0.00E+00 | 13.88    | 0.00E+00 | 0.12     | 0.00E+00 |
|              | SANC00365 | 0.20 | 0.01     | 0.00E+00 | 103.75   | 0.00E+00 | 0.54     | 0.00E+00 |
|              | SANC00367 | 0.22 | 0.01     | 0.00E+00 | 18.09    | 0.00E+00 | 0.76     | 0.00E+00 |
|              | SANC00369 | 0.22 | 0.01     | 0.00E+00 | -7.23    | 0.00E+00 | 0.45     | 0.00E+00 |
|              | SANC00371 | 0.22 | 0.01     | 0.00E+00 | -18.23   | 0.00E+00 | 0.56     | 0.00E+00 |
|              | SANC00372 | 0.23 | 0.02     | 0.00E+00 | -30.41   | 0.00E+00 | 0.59     | 0.00E+00 |
|              | SANC00373 | 0.22 | 0.02     | 0.00E+00 | 27.79    | 0.00E+00 | 0.45     | 0.00E+00 |
|              | 126461286 | 0.24 | 0.01     | 0.00E+00 | -10.55   | 0.00E+00 | 0.78     | 0.00E+00 |
|              | 126462623 | 0.22 | 0.01     | 0.00E+00 | 25.77    | 0.00E+00 | 0.81     | 0.00E+00 |
| 126465495    | 0.22      | 0.02 | 0.00E+00 | -17.78   | 0.00E+00 | 0.78     | 0.00E+00 |          |
| <b>Cat-L</b> | Apo       | 0.17 | 0.02     | 0.00E+00 | -        | 0.00E+00 | -        | 0.00E+00 |
|              | SANC00364 | 0.20 | 0.01     | 0.00E+00 | -226.70  | 0.00E+00 | 0.73     | 0.00E+00 |
|              | SANC00365 | 0.26 | 0.02     | 0.00E+00 | -435.27  | 0.00E+00 | 0.56     | 0.00E+00 |
|              | SANC00367 | 0.22 | 0.01     | 0.00E+00 | -312.34  | 0.00E+00 | 0.67     | 0.00E+00 |
|              | SANC00369 | 0.22 | 0.02     | 0.00E+00 | -329.78  | 0.00E+00 | 0.78     | 0.00E+00 |
|              | SANC00371 | 0.21 | 0.01     | 0.00E+00 | -335.45  | 0.00E+00 | 0.78     | 0.00E+00 |
|              | SANC00372 | 0.27 | 0.01     | 0.00E+00 | -356.65  | 0.00E+00 | 0.78     | 0.00E+00 |
|              | SANC00373 | 0.23 | 0.01     | 0.00E+00 | -323.45  | 0.00E+00 | 0.78     | 0.00E+00 |
|              | 126461286 | 0.31 | 0.02     | 0.00E+00 | -336.45  | 0.00E+00 | 0.84     | 0.00E+00 |
| 126462623    | 0.22      | 0.01 | 0.00E+00 | -336.45  | 0.00E+00 | 0.92     | 0.00E+00 |          |

|              |           |      |          |          |          |          |          |          |
|--------------|-----------|------|----------|----------|----------|----------|----------|----------|
|              | 126465495 | 0.21 | 0.02     | 0.00E+00 | -336.67  | 0.00E+00 | 0.65     | 0.00E+00 |
| <b>Cat-S</b> | Apo       | 0.21 | 0.02     | 0.00E+00 | -        | -        | -        | 0.00E+00 |
|              | SANC00364 | 0.24 | 0.02     | 0.00E+00 | -184.67  | 0.00E+00 | 0.91     | 0.00E+00 |
|              | SANC00365 | 0.26 | 0.01     | 0.00E+00 | -295.56  | 0.00E+00 | 0.67     | 0.00E+00 |
|              | SANC00367 | 0.22 | 0.02     | 0.00E+00 | -70.16   | 0.00E+00 | 0.78     | 0.00E+00 |
|              | SANC00369 | 0.25 | 0.01     | 0.00E+00 | -272.67  | 0.00E+00 | 0.45     | 0.00E+00 |
|              | SANC00371 | 0.24 | 0.02     | 0.00E+00 | -180.98  | 0.00E+00 | 0.89     | 0.00E+00 |
|              | SANC00372 | 0.33 | 0.02     | 0.00E+00 | -368.78  | 0.00E+00 | 0.67     | 0.00E+00 |
|              | SANC00373 | 0.26 | 0.01     | 0.00E+00 | -266.67  | 0.00E+00 | 0.87     | 0.00E+00 |
|              | 126461286 | 0.27 | 0.01     | 0.00E+00 | -381.78  | 0.00E+00 | 0.98     | 0.00E+00 |
|              | 126462623 | 0.26 | 0.03     | 0.00E+00 | -232.56  | 0.00E+00 | 0.78     | 0.00E+00 |
| 126465495    | 0.25      | 0.02 | 0.00E+00 | -204.56  | 0.00E+00 | 0.98     | 0.00E+00 |          |

391

392

393

394

395

396

397

398

399

400

401



402 **Table S4:** Ligand-residue interaction fingerprint at different MD simulation time steps. VDR and HBR indicate the number of residues involved  
 403 in van der Waals (hydrophobic) interactions and those involved in hydrogen (HBR) bonding respectively. Residue are numbered based on the  
 404 catalytic domain length of each protein (**Table S1**).

| Protein | Compound  |      |           |           |           |           |           |           |           |           |           |
|---------|-----------|------|-----------|-----------|-----------|-----------|-----------|-----------|-----------|-----------|-----------|
|         | Time (ns) | Type | SANC00364 | SANC00365 | SANC00367 | SANC00369 | SANC00371 | SANC00372 | 126461286 | 126462623 | 126465495 |
| Cat-K   | 0         | HBR  | W184      | W184      | Q19,W184  | Q19,W184  | Q19,W184  | Q19,W184  | Q19,W184  | Q19,W184  | Q19       |
|         |           | VDR  | 8         | 9         | 13        | 12        | 15        | 17        | 20        | 20        | 23        |
|         | 20        | HBR  | W184      | W184      | W184      | Q19       | W184      | W184      | W184      | W184      | Q19,N161  |
|         |           | VDR  | 10        | 8         | 12        | 13        | 13        | 16        | 20        | 21        | 22        |
|         | 40        | HBR  | W184      | W184      | W184      | Q19       | Q19,W184  | W184      | W184      | Q19       | W184      |
|         |           | VDR  | 9         | 7         | 13        | 14        | 15        | 17        | 22        | 21        | 22        |
|         | 60        | HBR  | W184      | W184      | Q19,W184  | Q19       | Q19       | Q19,W184  | W184      | W184      | N161,W184 |
|         |           | VDR  | 10        | 8         | 13        | 12        | 12        | 15        | 19        | 21        | 23        |
|         | 80        | HBR  | W184      | W184      | W184      | W184      | W184      | Q19,W184  | W184      | W184      | G65       |
|         |           | VDR  | 9         | 11        | 14        | 13        | 14        | 17        | 21        | 21        | 22        |
|         | 100       | HBR  | W184      | W184      | W184      | W184      | W184      | Q19,W184  | W184      | W184      | G65,N161  |
|         |           | VDR  | 11        | 8         | 13        | 12        | 14        | 16        | 20        | 20        | 21        |
| Cat-L   | 0         | HBR  | Q20       | Q20       | N19,D163  | Q20       | G21       | Q20       | G21,W190  | Q20,G21   | Q20,W190  |
|         |           | VDR  | 9         | 12        | 15        | 13        | 15        | 16        | 20        | 22        | 23        |
|         | 20        | HBR  | Q20       | Q20       | Q20       | Q20       | G21,W190  | Q20       | G21       | Q20,W190  | W190      |
|         |           | VDR  | 10        | 7         | 14        | 12        | 13        | 15        | 23        | 23        | 22        |
|         | 40        | HBR  | Q20       | W190      | N19,W190  | Q20       | G21       | Q20       | W190      | W190      | W190      |
|         |           | VDR  | 14        | 8         | 14        | 13        | 12        | 16        | 23        | 20        | 23        |
|         | 60        | HBR  | -         | W190      | N19,W190  | -         | W190      | -         | W190      | W190      | Q20       |
|         |           | VDR  | 12        | 8         | 13        | 12        | 14        | 17        | 20        | 21        | 22        |
|         | 80        | HBR  | Q20       | W190      | W190      | Q20,D163  | W190      | W190      | G21       | W190      | Q20,W190  |
|         |           | VDR  | 8         | 12        | 14        | 13        | 13        | 616       | 20        | 21        | 24        |
|         | 100       | HBR  | W190      | W190      | W190      | W190      | G21,W190  | W190      | W190      | W190      | Q20       |
|         |           | VDR  | 9         | 8         | 15        | 12        | 13        | 15        | 20        | 15        | 22        |
| Cat-S   | 0         | HBR  | Q19       | Q19       | Q19,W186  | W186      | Q19       | Q19       | W186      | Q19       | Q19       |
|         |           | VDR  | 10        | 11        | 15        | 13        | 14        | 16        | 23        | 23        | 22        |
|         | 20        | HBR  | W186      | Q19       | Q19       | Q19,W186  | -         | W186      | W186      | Q19,W186  | Q19,W186  |
|         |           | VDR  | 8         | 11        | 14        | 12        | 13        | 17        | 20        | 21        | 23        |
|         | 40        | HBR  | W186      | Q19       | Q19,W186  | W186      | W186      | Q19       | Q19       | Q19,W186  | Q19       |
|         |           | VDR  | 9         | 10        | 13        | 12        | 13        | 15        | 22        | 21        | 21        |
|         | 60        | HBR  | W186      | Q19       | Q19       | Q19       | Q19       | -         | W186      | Q19,W186  | W186      |
|         |           | VDR  | 10        | 10        | 12        | 14        | 13        | 15        | 21        | 21        | 22        |
|         | 80        | HBR  | W186      | Q19       | Q19       | Q19,W186  | W186      | W186      | W186      | Q19       | Q19       |
|         |           | VDR  | 8         | 11        | 13        | 13        | 12        | 16        | 20        | 23        | 20        |
|         | 100       | HBR  | W186      | Q19       | Q19,W186  | Q19,W186  | W186      | Q19       | W186      | Q19,W186  | W186      |
|         |           | VDR  | 10        | 11        | 12        | 13        | 13        | 16        | 19        | 21        | 19        |

|      |      |     |          |          |               |               |               |              |                       |                       |                       |                   |
|------|------|-----|----------|----------|---------------|---------------|---------------|--------------|-----------------------|-----------------------|-----------------------|-------------------|
| FP-2 | 0    | HBR | C42,W206 | C42,W206 | K37,C39,W207  | C39,W207      | Q36,N38,W206  | Q36,W206     | Q36,N81,G83,W206      | Q36,N81,G83,N173,W206 | Q36,N81,G83,N173,W206 |                   |
|      |      | VDR | 11       | 11       | 13            | 12            | 12            | 17           | 22                    | 22                    | 25                    |                   |
|      | 20   | HBR | W206     | W206     | K37           | C39,W207      | Q36,N38,W206  | Q36,N38,W206 | Q36,G83,W206          | Q36,N81,G83,N173,W206 | Q36,G83,N173,W206     |                   |
|      |      | VDR | 12       | 10       | 14            | 13            | 13            | 16           | 22                    | 24                    | 24                    |                   |
|      | 40   | HBR | C42,W206 | C42,W206 | C39,W207      | C39,W207      | 0             | Q36,N38,W206 | Q36,N81,G83,N173,W206 | Q36,N81,G83,N173,W206 | Q36,N81,G83,N173,W206 |                   |
|      |      | VDR | 10       | 12       | 12            | 12            | 13            | 15           | 23                    | 25                    | 26                    |                   |
|      | 60   | HBR | C42      | C42      | K37,C39       | C39,W207      | Q36,N38,W206  | Q36,N38,W206 | Q36,G83,N173,W206     | Q36,N81,G83,N173,W206 | Q36,N81,G83,N173,W206 |                   |
|      |      | VDR | 9        | 12       | 12            | 12            | 14            | 15           | 19                    | 24                    | 22                    |                   |
|      | 80   | HBR | C42,W206 | C42      | K37,C39       | C39,W207      | Q36,W206      | Q36,N38,W206 | G83                   | Q36,N81,G83,N173,W206 | Q36,N81,G83,N173,W206 |                   |
|      |      | VDR | 12       | 9        | 13            | 13            | 13            | 16           | 22                    | 24                    | 24                    |                   |
|      | 100  | HBR | C42,W206 | C42,W206 | K37,C39       | C39,W207      | Q36,N38,W206  | 0            | G83,N173              | Q36,N81,G83,N173,W206 | Q36,N81,G83,N173,W206 |                   |
|      |      | VDR | 12       | 10       | 13            | 12            | 13            | 16           | 23                    | 26                    | 25                    |                   |
|      | FP-3 | 0   | HBR      | G42,W208 | G42,W208      | G84,W208      | Q38,W208      | G40,G85,W208 | G85,W208              | G42,G85,N175,W208     | G42,G85,N175,W208     | 0                 |
|      |      |     | VDR      | 10       | 11            | 14            | 12            | 13           | 15                    | 20                    | 21                    | 27                |
| 20   |      | HBR | G42      | G42      | G84,W208      | Q38,W208      | G40,W208      | G85,W208     | G42,G85,N175,W208     | G42,G85,N175,W208     | G42,G85,N175,W208     |                   |
|      |      | VDR | 8        | 9        | 14            | 12            | 13            | 17           | 21                    | 23                    | 28                    |                   |
| 40   |      | HBR | G42,W208 | W208     | G84,W208      | Q38,W208      | G40,G85,W208  | G85,W208     | G85,N175,W208         | G42,N175,W208         | G42,G85,N175,W208     |                   |
|      |      | VDR | 12       | 10       | 13            | 13            | 14            | 18           | 23                    | 24                    | 23                    |                   |
| 60   |      | HBR | G42      | G42      | G84,W208      | G84,W208      | G40,W208      | G85,W208     | G42,G85,N175,W208     | G42,G85,N175,W208     | G85,N175,W208         |                   |
|      |      | VDR | 11       | 11       | 14            | 13            | 14            | 16           | 24                    | 25                    | 25                    |                   |
| 80   |      | HBR | G42,W208 | G42      | G84,W208      | G84,W208      | G40,G85,W208  | G85,W208     | G42,G85,N175,W208     | G42,G85,N175,W208     | G42,G85,N175,W208     |                   |
|      |      | VDR | 12       | 10       | 13            | 13            | 14            | 16           | 25                    | 22                    | 27                    |                   |
| 100  |      | HBR | G42      | W208     | G84,W208      | G84,W208      | G40,G85,W208  | G85,W208     | G42,G85,N175,W208     | G42,G85,N175,W208     | G42,G85,N175,W208     |                   |
|      |      | VDR | 12       | 10       | 13            | 12            | 13            | 17           | 21                    | 22                    | 22                    |                   |
| VP-2 |      | 0   | HBR      | D36,W207 | D36,W207      | A38,H175,W207 | A38,H175,W207 | Q37,A38,W207 | G41,Y82               | Q37,G84,N174,W207     | Q37,G84,N174,W207     | Q37,G84,N174,W207 |
|      |      |     | VDR      | 11       | 10            | 13            | 13            | 13           | 15                    | 24                    | 25                    | 23                |
|      | 20   | HBR | D36      | W207     | A38,W207      | A38,H175,W207 | Q37,W207      | Q37,A38,W207 | Q37,N174,W207         | Q37,G84,N174,W207     | Q37,G84,N174,W207     |                   |
|      |      | VDR | 10       | 10       | 14            | 12            | 14            | 14           | 24                    | 22                    | 24                    |                   |
|      | 40   | HBR | W207     | D36,W207 | A38,W207      | A38,W207      | Q37,A38,W207  | Q37,A38,W207 | Q37,G84,N174,W207     | Q37,N174,W207         | Q37,G84,N174,W207     |                   |
|      |      | VDR | 11       | 12       | 13            | 11            | 13            | 16           | 22                    | 24                    | 24                    |                   |
|      | 60   | HBR | D36,W207 | D36,W207 | A38,H175,W207 | A38,H175,W207 | Q37,A38,W207  | Q37,A38,W207 | Q37,N174,W207         | Q37,N174,W207         | Q37,G84,N174,W207     |                   |

|             |            |            |            |          |               |               |              |              |                    |                    |                   |
|-------------|------------|------------|------------|----------|---------------|---------------|--------------|--------------|--------------------|--------------------|-------------------|
|             |            | <b>VDR</b> | 12         | 8        | 14            | 12            | 13           | 17           | 24                 | 23                 | 25                |
|             | <b>80</b>  | <b>HBR</b> | W207       | D36,W207 | A38,W207      | A38,H175,W207 | Q37,A38,W207 | Q37,A38,W207 | Q37,G84,N174,W207  | Q37,G84,N174,W207  | G84,N174,W207     |
|             |            | <b>VDR</b> | 15         | 12       | 11            | 12            | 12           | 16           | 20                 | 22                 | 25                |
|             | <b>100</b> | <b>HBR</b> | D36,W207   | D36,W207 | A38,H175,W207 | 0             | Q37,A38,W207 | Q37,A38,W207 | N174               | Q37,G84,N174,W207  | G84,N174,W207     |
|             |            | <b>VDR</b> | 11         | 13       | 13            | 12            | 12           | 16           | 21                 | 25                 | 24                |
| <b>VP-3</b> | <b>0</b>   | <b>HBR</b> | D81,W206   | D81,W206 | Q36,W206      | Q36,W206      | Q36,W206     | G40,G83,W206 | G40,N173,Q234,W206 | G40,N173,Q234,W206 | G83,N173          |
|             |            | <b>VDR</b> | 11         | 12       | 13            | 13            | 13           | 17           | 16                 | 22                 | 26                |
|             | <b>20</b>  | <b>HBR</b> | D81,W206   | D81,W206 | Q36,W206      | W206          | Q36,W206     | G40,G83,W206 | G40,N173,Q234,W206 | G40,N173,Q234,W206 | G83,Q234,W206     |
|             |            | <b>VDR</b> | 12         | 11       | 12            | 12            | 12           | 16           | 22                 | 24                 | 22                |
|             | <b>40</b>  | <b>HBR</b> | D81,W206   | D81      | W206          | Q36,W206      | W206         | G40,W206     | G40,N173,Q234,W206 | G40,N173,Q234,W206 | G83,Q234,W206     |
|             |            | <b>VDR</b> | 13         | 11       | 12            | 12            | 12           | 17           | 23                 | 24                 | 22                |
|             | <b>60</b>  | <b>HBR</b> | W206       | W206     | Q36,W206      | Q36           | Q36,W206     | G40,G83,W206 | G40,N173,Q234,W206 | G40,N173,Q234,W206 | G83,Q234,W206     |
|             |            | <b>VDR</b> | 11         | 10       | 13            | 11            | 13           | 17           | 24                 | 25                 | 21                |
|             | <b>80</b>  | <b>HBR</b> | D81,W206   | D81,W206 | Q36,W206      | W206          | Q36,W206     | G40,G83,W206 | G40,N173,Q234,W206 | G40,N173,Q234,W206 | G83,Q234,W206     |
|             |            | <b>VDR</b> | 11         | 11       | 13            | 13            | 13           | 16           | 23                 | 23                 | 23                |
|             | <b>100</b> | <b>HBR</b> | W206       | D81,W206 | Q36,W206      | Q36,W206      | Q36,W206     | G40,W206     | 0                  | 0                  | G83,Q234,W206     |
|             |            |            | <b>VDR</b> | 11       | 10            | 13            | 13           | 14           | 16                 | 22                 | 22                |
| <b>KP-2</b> | <b>0</b>   | <b>HBR</b> | Q37,W207   | D36,W207 | Q37,W207      | W207          | Q37,G84,W207 | Q37,G84,W207 | C40,G84,E235,W207  | Q37,T158           | G84,T158,N174     |
|             |            | <b>VDR</b> | 10         | 13       | 12            | 12            | 13           | 16           | 23                 | 24                 | 22                |
|             | <b>20</b>  | <b>HBR</b> | Q37        | Q37      | Q37,W207      | Q37,W207      | Q37,G84,W207 | Q37,G84,W207 | C40,G84,E235,W207  | C40,G84,E235,W207  | C40,G84,E235,W207 |
|             |            | <b>VDR</b> | 11         | 11       | 12            | 13            | 12           | 16           | 19                 | 23                 | 24                |
|             | <b>40</b>  | <b>HBR</b> | Q37,W207   | Q37      | Q37           | Q37,W207      | W207         | G40,W206     | C40,G84,E235,W207  | C40,E235,W207      | C40,G84,E235,W207 |
|             |            | <b>VDR</b> | 11         | 12       | 13            | 13            | 13           | 18           | 23                 | 24                 | 22                |
|             | <b>60</b>  | <b>HBR</b> | Q37        | Q37,W207 | Q37,W207      | Q37,W207      | Q37,G84,W207 | G40,W206     | C40,E235,W207      | C40,G84,E235,W207  | C40,G84,E235,W207 |
|             |            | <b>VDR</b> | 10         | 11       | 12            | 12            | 15           | 16           | 24                 | 22                 | 22                |
|             | <b>80</b>  | <b>HBR</b> | Q37,W207   | Q37      | Q37,W207      | Q37,W207      | Q37,W207     | G40,W206     | C40,G84,E235,W207  | C40,G84,E235,W207  | C40,G84,E235,W207 |
|             |            | <b>VDR</b> | 12         | 11       | 12            | 13            | 14           | 17           | 24                 | 24                 | 23                |
|             | <b>100</b> | <b>HBR</b> | Q37,W207   | Q37,W207 | Q37,W207      | Q37,W207      | Q37,G84,W207 | G40,W206     | G84,E235,W207      | C40,G84,E235,W207  | C40,G84,E235,W207 |
|             |            |            | <b>VDR</b> | 11       | 12            | 13            | 12           | 13           | 16                 | 23                 | 23                |
| <b>KP-3</b> | <b>0</b>   | <b>HBR</b> | D34,W205   | W205     | D34,C38,W205  | D34,C38,W205  | D34,G39,W205 | D34,G39,W205 | D34,G82,W205,E233  | N172               | N172              |
|             |            | <b>VDR</b> | 11         | 11       | 13            | 12            | 13           | 18           | 22                 | 24                 | 22                |
|             | <b>20</b>  | <b>HBR</b> | D34        | D34,W205 | D34,W205      | D34,W205      | D34,W205     | D34,G39,W205 | D34,G82,W205,E233  | D34,G82,W205,E233  | D34,G82,W205,E233 |

|      |      |     |          |          |              |              |              |              |                       |                       |                       |                       |
|------|------|-----|----------|----------|--------------|--------------|--------------|--------------|-----------------------|-----------------------|-----------------------|-----------------------|
|      | 40   | VDR | 12       | 11       | 12           | 12           | 14           | 15           | 21                    | 22                    | 24                    |                       |
|      |      | HBR | D34,W205 | D34,W205 | D34,C38,W205 | D34,W205     | G39,W205     | D34,W205     | D34,G82,W205,E23<br>3 | D34,G82,W205,E23<br>3 | D34,G82,W205,E23<br>3 |                       |
|      | 60   | VDR | 11       | 11       | 12           | 12           | 13           | 17           | 20                    | 22                    | 24                    |                       |
|      |      | HBR | W205     | D34,W205 | D34,C38,W205 | D34,C38,W205 | D34,G39,W205 | D34,G39,W205 | D34,G82,W205,E23<br>3 | D34,G82,W205,E23<br>3 | D34,G82,W205,E23<br>3 |                       |
|      | 80   | VDR | 12       | 14       | 13           | 13           | 13           | 16           | 21                    | 24                    | 26                    |                       |
|      |      | HBR | D34,W205 | D34,W205 | D34,C38,W205 | D34,C38,W205 | D34,W205     | D34,W205     | D34,G82,W205,E23<br>3 | D34,G82,W205,E23<br>3 | D34,G82,W205,E23<br>3 |                       |
|      | 100  | VDR | 11       | 12       | 12           | 12           | 13           | 16           | 19                    | 23                    | 22                    |                       |
|      |      | HBR | D34,W205 | D34,W205 | D34,C38,W205 | D34,C38,W205 | D34,G39,W205 | D34,G39,W205 | D34,G82,W205,E23<br>3 | D34,G82,W205,E23<br>3 | D34,G82,W205,E23<br>3 |                       |
|      | BP-2 | 0   | VDR      | 13       | 13           | 12           | 12           | 12           | 17                    | 22                    | 24                    | 21                    |
|      |      |     | HBR      | Q37,W207 | Q37,W207     | Q37,E82,W207 | Q37,G84,W207 | Q37,G84,W207 | Q37,W207              | Q37,G82,W205,E23<br>3 | Q37,G82,W205,E23<br>3 | Q37,G82,W205,E23<br>3 |
|      |      | 20  | VDR      | 11       | 7            | 13           | 13           | 14           | 17                    | 23                    | 22                    | 22                    |
|      |      |     | HBR      | Q37,W207 | W207         | Q37,E82,W207 | Q37,E82,W207 | Q37,G84,W207 | G84,W207              | Q37,G82,W205,E23<br>3 | Q37,G84,W205,E23<br>3 | Q37,G82,W205,E23<br>3 |
| 40   |      | VDR | 9        | 9        | 12           | 13           | 13           | 15           | 23                    | 24                    | 24                    |                       |
|      |      | HBR | Q37,207  | Q37      | Q37,E82,W207 | Q37,W207     | Q37,G84,W207 | Q37,G84,W207 | Q37,G82,W205,E23<br>3 | Q37,G84,N174,E233     | Q37,G84,W205,E23<br>3 |                       |
| 60   |      | VDR | 10       | 9        | 12           | 12           | 13           | 17           | 22                    | 24                    | 21                    |                       |
|      |      | HBR | Q37      | Q37,W207 | Q37,G84,W207 | Q37,G84,W207 | Q37,G84,W207 | Q37,W207     | Q37,G82,W205,E23<br>3 | Q37,G84,N174,E233     | Q37,G84,W205,E23<br>3 |                       |
| 80   |      | VDR | 11       | 10       | 13           | 13           | 13           | 16           | 24                    | 23                    | 11                    |                       |
|      |      | HBR | Q37,W207 | Q37      | W207         | Q37,G84,W207 | Q37,G84,W207 | Q37,G84,W207 | Q37,G82,W205,E23<br>3 | Q37,G84,N174,E233     | Q37,G84,W205,E23<br>3 |                       |
| 100  |      | VDR | 10       | 10       | 12           | 12           | 12           | 17           | 23                    | 22                    | 24                    |                       |
|      |      | HBR | Q37,W207 | Q37,W207 | G84,W207     | Q37,G84,W207 | Q37,G84,W207 | Q37,G84,W207 | Q37,G82,W205,E23<br>3 | Q37,G84,N174,E233     | Q37,G84,W205,E23<br>3 |                       |
| CP-2 | 0    | VDR | 12       | 9        | 14           | 14           | 13           | 16           | 24                    | 22                    | 23                    |                       |
|      |      | HBR | W207     | Q37      | Q37,W207     | Q37,W207     | C43,G84,N174 | C43,G84,N174 | Q37,E82,N174,W20<br>7 | Q37,E82,N174,W20<br>7 | Q37,E82,N174,W20<br>7 |                       |
|      | 20   | VDR | 11       | 8        | 12           | 12           | 13           | 17           | 22                    | 23                    | 25                    |                       |
|      |      | HBR | Q37,W207 | Q37,C40  | W207         | Q37,W207     | C43,G84,N174 | C43,G84,N174 | Q37,E82,N174,W20<br>7 | Q37,E82,N174,W20<br>7 | Q37,E82,N174,W20<br>7 |                       |
|      | 40   | VDR | 11       | 7        | 13           | 12           | 12           | 16           | 24                    | 22                    | 24                    |                       |
|      |      | HBR | Q37      | Q37,W207 | Q37,W207     | -            | H175         | C43,G84,N174 | Q37,E82,N174,W20<br>7 | Q37,E82,N174,W20<br>7 | Q37,E82,N174,W20<br>7 |                       |
|      | 60   | VDR | 12       | 11       | 12           | 13           | 13           | 16           | 23                    | 21                    | 22                    |                       |
|      |      | HBR | Q37,W207 | Q37,C40  | Q37,W207     | Q37,W207     | C43,G84,N174 | C43,G84,N174 | Q37,E82,N174,W20<br>7 | Q37,E82,N174,W20<br>7 | Q37,E82,N174,W20<br>7 |                       |
|      | 80   | VDR | 13       | 12       | 12           | 12           | 12           | 17           | 21                    | 22                    | 24                    |                       |
|      |      | HBR | Q37      | Q37,W207 | Q37          | Q37,W207     | C43,G84,N174 | C43,G84,N174 | Q37,E82,N174,W20<br>7 | Q37,E82,N174,W20<br>7 | Q37,E82,N174,W20<br>7 |                       |
|      |      |     | VDR      | 9        | 10           | 13           | 12           | 13           | 18                    | 22                    | 22                    | 23                    |

|             |            |            |          |          |              |              |              |              |                   |                   |                   |
|-------------|------------|------------|----------|----------|--------------|--------------|--------------|--------------|-------------------|-------------------|-------------------|
|             | <b>100</b> | <b>HBR</b> | Q37,W207 | Q37,W207 | Q37          | Q37,W207     | C43,H175     | C43,G84,N174 | Q37,E82,N174,W207 | Q37,E82,N174,W207 | Q37,E82,N174,W207 |
|             |            | <b>VDR</b> | 8        | 9        | 12           | 12           | 13           | 18           | 20                | 24                | 24                |
| <b>YP-2</b> | <b>0</b>   | <b>HBR</b> | Q37,W207 | Q37,W207 | Q37,G84,W207 | Q37,G84,W207 | Q37,G84,W207 | Q37,W207     | G84,N174,W207     | G84,N174          | G84               |
|             |            | <b>VDR</b> | 11       | 10       | 12           | 12           | 12           | 17           | 23                | 24                | 22                |
|             | <b>20</b>  | <b>HBR</b> | Q37      | Q37      | Q37,G84,W207 | Q37,G84,W207 | Q37,G84,W207 | Q37,G84,W207 | Q37,N174          | G84,N174,W207     | G84,N174,W207     |
|             |            | <b>VDR</b> | 10       | 9        | 12           | 11           | 10           | 18           | 24                | 24                | 24                |
|             | <b>40</b>  | <b>HBR</b> | W207     | Q37,W207 | Q37,W207     | 0            | Q37,W207     | Q37,W207     | G84,N174,W207     | N174              | G84,N174,W207     |
|             |            | <b>VDR</b> | 10       | 7        | 12           | 13           | 14           | 18           | 23                | 22                | 24                |
|             | <b>60</b>  | <b>HBR</b> | Q37,W207 | Q37,W207 | Q37,G84,W207 | Q37,G84,W207 | Q37,G84,W207 | Q37,G84,W207 | G84,N174,W207     | G84,N174,W207     | N174              |
|             |            | <b>VDR</b> | 11       | 9        | 12           | 12           | 13           | 17           | 21                | 22                | 22                |
|             | <b>80</b>  | <b>HBR</b> | Q37,W207 | Q37      | Q37,W207     | Q37,G84,W207 | Q37,G84,W207 | Q37,G84,W207 | G84,N174          | N174              | G84,N174,W207     |
|             |            | <b>VDR</b> | 12       | 10       | 12           | 12           | 12           | 16           | 21                | 22                | 22                |
|             | <b>100</b> | <b>HBR</b> | Q37,W207 | Q37,W207 | Q37,W207     | 0            | Q37,W207     | Q37,G84,W207 | G84,N174,W207     | G84,N174,W207     | G84,N174,W207     |
|             |            | <b>VDR</b> | 11       | 11       | 12           | 12           | 12           | 16           | 22                | 23                | 23                |

405

406

407

408

409

410

411

412

413

414

415

416

417

418 **Table S5:** Protein-ligand complex binding free energy terms in kJ/mol as determined by molecular mechanics Poisson-Boltzmann surface area  
419 (MM-PBSA) analysis. vdW=van der Waals forces, ele=electrostatics, PB=polar solvation energy, SASA=Soluble Accessible Surface Area,  
420 bind=binding free energy.

| Protein | Energy            | Compound         |                  |                  |                  |                  |                  |                   |                   |                   |
|---------|-------------------|------------------|------------------|------------------|------------------|------------------|------------------|-------------------|-------------------|-------------------|
|         |                   | SANC00364        | SANC00365        | SANC00367        | SANC00369        | SANC00371        | SANC00372        | 126461286         | 126462623         | 126465495         |
| Cat S   | $\Delta G_{vdW}$  | -90.7±0.3        | -90.1±0.2        | -117.4±0.2       | -112.4±0.4       | -112.8±0.2       | -113.2±0.2       | -134.8±0.2        | -131.8±0.3        | -132.1±0.2        |
|         | $\Delta E_{ele}$  | -1.1±0.2         | -2.3±0.3         | -9.5±0.3         | -10.4±0.3        | -10.3±0.2        | -10.8±0.3        | -14.9±0.3         | -19.3±0.2         | -17.3±0.2         |
|         | $\Delta G_{PB}$   | 62.5±0.2         | 54.8±0.2         | 65.8±0.2         | 65.5±0.3         | 67.5±0.5         | 68.8±0.2         | 38.6±0.2          | 35.5±0.2          | 43.5±0.3          |
|         | $\Delta G_{SASA}$ | -6.1±0.3         | -5.5±0.2         | -7.4±0.3         | -8.3±0.2         | -10.3±0.4        | -7.4±0.3         | -13.6±0.2         | -17.7±0.2         | -15.9±0.2         |
|         | $\Delta G_{bind}$ | <b>-35.5±0.2</b> | <b>-43.1±0.2</b> | <b>-68.4±0.2</b> | <b>-65.6±0.2</b> | <b>-66.0±0.2</b> | <b>-62.6±0.2</b> | <b>-124.6±0.5</b> | <b>-133.4±0.2</b> | <b>-121.8±0.4</b> |
| Cat K   | $\Delta G_{vdW}$  | -88.7±0.3        | -90.4±0.2        | -116.1±0.2       | -112.1±0.2       | -121.7±0.2       | -121.1±0.4       | -130.6±0.4        | -136.9±0.2        | -137.5±0.2        |
|         | $\Delta E_{ele}$  | -2.5±0.3         | -3.7±0.2         | -9.5±0.2         | -7.9±0.2         | -9.8±0.2         | -9.7±0.2         | -17.8±0.4         | -17.8±0.2         | -18.2±0.2         |
|         | $\Delta G_{PB}$   | 68.0±0.2         | 55.5±0.2         | 70.8±0.2         | 64.0±0.3         | 63.6±0.2         | 70.0±0.2         | 43.4±0.2          | 36.5±0.2          | 49.5±0.2          |
|         | $\Delta G_{SASA}$ | -7.0±0.2         | -6.2±0.4         | -7.9±0.2         | -8.2±0.2         | -9.4±0.4         | -8.9±0.2         | -16.3±0.4         | -16.3±0.2         | -16.7±0.4         |
|         | $\Delta G_{bind}$ | <b>-30.2±0.4</b> | <b>-45.8±0.2</b> | <b>-62.7±0.2</b> | <b>-64.2±0.2</b> | <b>-77.3±0.2</b> | <b>-70.1±0.2</b> | <b>-121.3±0.2</b> | <b>-134.6±0.2</b> | <b>-122.9±0.2</b> |
| Cat L   | $\Delta G_{vdW}$  | -90.5±0.3        | -90.9±0.4        | -116.1±0.2       | -110.1±0.2       | -117.9±0.2       | -117.4±0.2       | -132.9±0.3        | -130.7±0.2        | -134.2±0.2        |
|         | $\Delta E_{ele}$  | -2.3±0.3         | -4.3±0.2         | -8.5±0.4         | 6.6±0.2          | -9.8±0.3         | -12.6±0.2        | -19.5±0.2         | -19.7±0.3         | -16.6±0.3         |
|         | $\Delta G_{PB}$   | 63.5±0.2         | 64.6±0.4         | 67.6±0.5         | 69.7±0.2         | 70.5±0.2         | 63.5±0.2         | 45.4±0.2          | 37.5±0.2          | 46.5±0.2          |
|         | $\Delta G_{SASA}$ | -7.7±0.2         | -5.8±0.2         | -8.6±0.4         | -9.4±0.2         | -8.8±0.2         | -9.8±0.2         | -17.9±0.2         | -18.1±0.2         | -15.2±0.2         |
|         | $\Delta G_{bind}$ | <b>-37.1±0.2</b> | <b>-36.5±0.2</b> | <b>-65.6±0.5</b> | <b>-56.6±0.2</b> | <b>-65.9±0.2</b> | <b>-76.8±0.2</b> | <b>-124.1±0.2</b> | <b>-131.0±0.2</b> | <b>-119.6±0.2</b> |
| FP-2    | $\Delta G_{vdW}$  | -90.0±0.2        | -93.3±0.2        | -113.4±0.2       | -117.3±2.7       | -126.5±0.2       | -125.2±0.2       | -137.9±0.2        | -143.3±0.2        | -140.6±0.2        |
|         | $\Delta E_{ele}$  | -4.9±0.2         | -3.3±0.2         | -8.5±0.3         | -10.5±1.7        | -9.9±0.3         | -10.5±0.3        | -17.4±0.3         | -19.4±0.3         | -17.3±0.3         |
|         | $\Delta G_{PB}$   | 54.7±0.2         | 53.6±0.2         | 63.6±0.2         | 59.0±3.1         | 68.6±0.2         | 57.7±0.2         | 40.3±0.2          | 38.7±0.2          | 41.5±0.2          |
|         | $\Delta G_{SASA}$ | -6.7±0.2         | -5.9±0.2         | -8.8±0.3         | -7.8±1.7         | -7.3±0.3         | -8.7±0.3         | -16.0±0.3         | -17.8±0.3         | -15.9±0.3         |
|         | $\Delta G_{bind}$ | <b>-46.8±0.2</b> | <b>-49.0±0.2</b> | <b>-67.3±0.2</b> | <b>-76.6±2.7</b> | <b>-75.1±0.2</b> | <b>-86.7±0.2</b> | <b>-132.0±0.2</b> | <b>-141.9±0.2</b> | <b>-132.3±0.2</b> |
| FP-3    | $\Delta G_{vdW}$  | -94.2±0.2        | -91.5±0.2        | -115.6±0.3       | -113.6±0.2       | -124.6±0.2       | -129.3±0.6       | -137.5±0.2        | -142.1±0.2        | -137.5±0.2        |
|         | $\Delta E_{ele}$  | -4.3±0.3         | -3.5±0.2         | -7.9±0.3         | -9.7±0.3         | -9.8±0.3         | -9.9±0.3         | -17.4±0.3         | -19.4±0.3         | -17.3±0.2         |
|         | $\Delta G_{PB}$   | 57.9±0.2         | 54.9±0.2         | 68.3±0.2         | 60.6±0.2         | 63.5±0.4         | 64.6±0.4         | 42.5±0.4          | 34.9±0.2          | 43.5±0.2          |
|         | $\Delta G_{SASA}$ | -7.0±0.2         | -6.4±0.2         | -8.0±0.2         | -7.8±0.2         | -7.6±0.2         | -8.7±0.4         | -16.0±0.2         | -17.8±0.2         | -15.9±0.2         |
|         | $\Delta G_{bind}$ | <b>-47.6±0.2</b> | <b>-46.5±0.2</b> | <b>-63.0±0.2</b> | <b>-70.1±0.2</b> | <b>-78.5±0.2</b> | <b>-83.3±0.4</b> | <b>-128.4±0.2</b> | <b>-144.4±0.2</b> | <b>-127.2±0.2</b> |
| VP-2    | $\Delta G_{vdW}$  | -87.4±0.2        | -87.7±0.2        | -112.2±0.2       | -114.2±0.2       | -130.0±0.4       | -125.6±0.2       | -144.2±0.2        | -137.9±0.2        | -137.5±0.2        |
|         | $\Delta E_{ele}$  | -5.8±0.3         | -3.9±0.3         | -5.6±0.3         | -9.6±0.3         | -10.5±0.4        | -10.5±0.3        | -18.4±0.3         | -18.3±0.2         | -18.0±0.3         |
|         | $\Delta G_{PB}$   | 49.9±0.2         | 49.7±0.2         | 70.7±0.2         | 56.5±0.2         | 68.4±0.5         | 65.7±0.2         | 42.9±0.2          | 28.3±0.2          | 45.6±0.2          |
|         | $\Delta G_{SASA}$ | -5.8±0.2         | -4.4±0.3         | -9.4±0.2         | -7.2±0.2         | -7.0±0.4         | -9.2±0.02        | -16.9±0.2         | -16.8±0.2         | -16.5±0.2         |
|         | $\Delta G_{bind}$ | <b>-49.2±0.2</b> | <b>-46.4±0.2</b> | <b>-56.5±0.2</b> | <b>-73.4±0.2</b> | <b>-78.9±0.6</b> | <b>-79.5±0.2</b> | <b>-136.6±0.2</b> | <b>-144.2±0.2</b> | <b>-126.4±0.2</b> |
| VP-3    | $\Delta G_{vdW}$  | -91.6±0.2        | -87.7±0.2        | -118.3±0.2       | -114.7±0.2       | -123.6±0.2       | -126.0±0.2       | -137.2±0.2        | -138.6±0.2        | -138.1±0.2        |

|             |                          |                  |                  |                  |                  |                  |                  |                   |                   |                   |
|-------------|--------------------------|------------------|------------------|------------------|------------------|------------------|------------------|-------------------|-------------------|-------------------|
|             | $\Delta E_{\text{ele}}$  | -2.3±0.2         | -2.5±0.3         | -9.9±0.4         | -10.6±0.2        | -11.3±0.3        | -11.3±0.2        | -17.8±0.3         | -17.6±0.3         | -16.7±0.3         |
|             | $\Delta G_{\text{PB}}$   | 58.9±0.2         | 53.3±0.2         | 65.6±0.5         | 48.8±0.2         | 63.9±0.2         | 64.9±0.5         | 38.7±0.2          | 30.5±0.2          | 47.5±0.2          |
|             | $\Delta G_{\text{SASA}}$ | -6.0±0.2         | -5.4±0.2         | -7.7±0.2         | -8.3±0.3         | -9.3±0.2         | -8.9±0.2         | -16.3±0.2         | -16.2±0.3         | -15.3±0.2         |
|             | $\Delta G_{\text{bind}}$ | <b>-41.1±0.2</b> | <b>-42.3±0.2</b> | <b>-70.4±0.5</b> | <b>-84.8±0.2</b> | <b>-80.3±0.2</b> | <b>-81.3±0.2</b> | <b>-132.7±0.2</b> | <b>-141.9±0.2</b> | <b>-122.6±0.2</b> |
| <b>KP-2</b> | $\Delta G_{\text{vdW}}$  | -87.6±0.2        | -93.7±0.2        | 109.75±0.2       | -113.7±0.5       | -128.3±0.2       | -123.7±0.2       | -136.8±0.2        | -137.0±0.2        | -140.4±0.2        |
|             | $\Delta E_{\text{ele}}$  | -2.2±0.3         | -3.0±0.2         | -7.0±0.2         | -9.6±0.2         | 8.9±0.3          | -9.8±0.3         | -18.4±0.3         | -21.0±0.2         | -15.6±0.3         |
|             | $\Delta G_{\text{PB}}$   | 57.7±0.2         | 56.8±0.4         | -64.8±0.4        | 56.6±0.5         | 64.6±0.2         | 64.6±0.2         | 46.5±0.2          | 34.6±0.2          | 46.5±0.2          |
|             | $\Delta G_{\text{SASA}}$ | -7.4±0.2         | -5.5±0.2         | -9.3±0.2         | -8.6±0.4         | -8.2±0.3         | -9.2±0.2         | -16.9±0.2         | -19.3±0.2         | -14.3±0.2         |
| <b>KP-3</b> | $\Delta G_{\text{bind}}$ | <b>-39.7±0.2</b> | <b>-45.4±0.2</b> | <b>-61.2±0.4</b> | <b>-75.4±0.2</b> | <b>-80.8±0.2</b> | <b>-78.1±0.2</b> | <b>-125.6±0.2</b> | <b>-142.7±0.2</b> | <b>-123.7±0.2</b> |
|             | $\Delta G_{\text{vdW}}$  | -89.2±0.2        | -93.1±0.3        | -112.4±0.2       | -113.6±0.2       | -127.1±0.2       | -123.5±0.2       | -136.0±0.2        | -140.6±0.2        | -142.2±0.2        |
|             | $\Delta E_{\text{ele}}$  | -3.5±0.2         | -3.2±0.2         | -7.9±0.2         | -10.5±0.2        | -9.9±0.2         | -11.2±0.3        | -18.4±0.3         | -17.8±0.3         | -18.7±0.3         |
|             | $\Delta G_{\text{PB}}$   | 63.6±0.2         | 53.5±0.2         | 64.3±0.2         | 63.2±0.4         | 64.7±0.2         | 63.9±0.2         | 37.6±0.4          | 37.4±0.5          | 45.4±0.4          |
| <b>BP-2</b> | $\Delta G_{\text{SASA}}$ | -5.8±0.2         | -6.0±0.3         | -8.6±0.3         | -8.8±0.2         | -8.2±0.3         | -9.2±0.2         | -16.7±0.2         | -16.3±0.2         | -17.2±0.2         |
|             | $\Delta G_{\text{bind}}$ | <b>-33.6±0.4</b> | <b>-49.0±0.2</b> | <b>-64.5±0.2</b> | <b>-69.7±0.2</b> | <b>-80.6±0.2</b> | <b>-80.0±0.2</b> | <b>-133.7±0.2</b> | <b>-137.3±0.2</b> | <b>-132.7±0.2</b> |
|             | $\Delta G_{\text{vdW}}$  | -90.5±0.2        | -93.3±0.2        | -116.8±0.2       | -116.1±0.5       | -122.4±0.4       | -126.8±0.4       | -112±0.2          | -148.3±0.2        | -141.7±0.2        |
|             | $\Delta E_{\text{ele}}$  | -3.5±0.3         | -2.4±0.2         | -9.5±0.2         | -9.8±0.2         | -9.9±0.2         | -10.4±0.2        | -16.3±0.2         | -17.4±0.3         | -18.3±0.2         |
| <b>CP-2</b> | $\Delta G_{\text{PB}}$   | 68.7±0.2         | 54.3±0.4         | 62.5±0.2         | 56.9±0.2         | 64.6±0.5         | 62.4±0.2         | 45.6±0.5          | 37.4±0.2          | 48.7±0.2          |
|             | $\Delta G_{\text{SASA}}$ | -6.0±0.2         | -5.6±0.3         | -9.6±0.2         | -9.4±0.2         | -8.6±0.4         | -8.2±0.2         | -15.0±0.2         | -16.0±0.2         | -16.8±0.2         |
|             | $\Delta G_{\text{bind}}$ | <b>-31.3±0.2</b> | <b>-46.7±0.4</b> | <b>-73.4±0.4</b> | <b>-78.4±0.5</b> | <b>-76.3±0.5</b> | <b>-83.0±0.2</b> | <b>-125.1±0.4</b> | <b>-144.3±0.2</b> | <b>-128.1±0.2</b> |
|             | $\Delta G_{\text{vdW}}$  | -91.5±0.2        | -92.7±0.2        | -118.0±0.3       | -116.0±0.2       | -129.8±0.2       | -127.9±0.2       | -141.4±0.2        | -140.6±0.2        | -143.5±0.2        |
| <b>YP-2</b> | $\Delta E_{\text{ele}}$  | -4.2±0.3         | -3.6±0.2         | -9.3±0.2         | -9.9±0.2         | -9.8±0.3         | -10.3±0.2        | -21.7±0.4         | -17.4±0.2         | -19.5±0.2         |
|             | $\Delta G_{\text{PB}}$   | 56.7±0.2         | 57.6±0.2         | 59.7±0.2         | 67.3±0.4         | 70.5±0.2         | 56.6±0.2         | 43.6±0.2          | 35.6±0.2          | 45.6±0.2          |
|             | $\Delta G_{\text{SASA}}$ | -5.4±0.2         | -6.4±0.2         | -7.2±0.3         | -9.4±0.2         | -10.0±0.2        | -10.9±0.2        | -20.0±0.2         | -16.0±0.2         | -17.9±0.2         |
|             | $\Delta G_{\text{bind}}$ | <b>-44.5±0.2</b> | <b>-45.1±0.2</b> | <b>-75.2±0.3</b> | <b>-68.0±0.2</b> | <b>-79.0±0.2</b> | <b>-92.6±0.2</b> | <b>-139.6±0.4</b> | <b>-138.4±0.2</b> | <b>-135.3±0.2</b> |
| <b>YP-2</b> | $\Delta G_{\text{vdW}}$  | -94.1±0.2        | -88.9±0.2        | -112.2±0.4       | -115.8±0.2       | -121.7±0.2       | -121.1±0.2       | -131.8±0.2        | -143.0±0.2        | -136.8±0.2        |
|             | $\Delta E_{\text{ele}}$  | -4.8±0.3         | -2.9±0.2         | -8.6±0.3         | -10.3±0.3        | -9.0±0.2         | -10.6±0.2        | -19.4±0.2         | -18.5±0.3         | -16.8±0.2         |
|             | $\Delta G_{\text{PB}}$   | 60.5±0.2         | 58.4±0.4         | 65.7±0.2         | 64.5±0.2         | 64.4±0.2         | 63.6±0.2         | 39.6±0.4          | 36.6±0.2          | 41.6±0.2          |
|             | $\Delta G_{\text{SASA}}$ | -5.1±0.2         | -6.2±0.2         | -8.5±0.2         | -8.6±0.3         | -9.4±0.2         | -9.7±0.2         | -17.8±0.2         | -17.0±0.2         | -15.4±0.2         |
|             | $\Delta G_{\text{bind}}$ | <b>-43.4±0.2</b> | <b>-39.5±0.2</b> | <b>-63.6±0.2</b> | <b>-70.3±0.2</b> | <b>-77.7±0.2</b> | <b>-83.4±0.2</b> | <b>-129.5±0.2</b> | <b>-142.1±0.2</b> | <b>-127.6±0.2</b> |

421

422

423

424

425 **Table S6:** Subsite residue composition information (details and position). Residue numbering based on the catalytic domain length of individual  
 426 proteins as indicated in **Table S1**.

| Subsite    |   | Protein |      |      |      |      |      |      |      |      |       |       |       |
|------------|---|---------|------|------|------|------|------|------|------|------|-------|-------|-------|
|            |   | FP-2    | FP-3 | VP-2 | VP-3 | KP-2 | KP-3 | BP-2 | CP-2 | YP-2 | Cat-K | Cat-L | Cat-S |
| <b>S1</b>  | a | Q36     | Q38  | Q37  | Q36  | Q37  | Q35  | Q37  | Q37  | Q37  | Q19   | Q20   | Q19   |
|            | b | C39     | C41  | C40  | C39  | C40  | C38  | C40  | C40  | C40  | C22   | C23   | C22   |
|            | c | G40     | G42  | G41  | G40  | G41  | G39  | A41  | A41  | A41  | G23   | G24   | G23   |
|            | d | C80     | C82  | C81  | C80  | C81  | C79  | C81  | C81  | C81  | C63   | C66   | C66   |
|            | e | N81     | Y83  | Y82  | D81  | D82  | D80  | E82  | E82  | D82  | G64   | N67   | N67   |
| <b>S2</b>  | a | L84     | Y86  | F85  | N84  | L85  | F83  | I85  | I85  | I85  | Y67   | L70   | F70   |
|            | b | I85     | I87  | I86  | I85  | I86  | I84  | L86  | L86  | L86  | M68   | M71   | M71   |
|            | c | S149    | S151 | S150 | S149 | S150 | N148 | A150 | A150 | A150 | A134  | A136  | G137  |
|            | d | L172    | P174 | P173 | P172 | P173 | T171 | A173 | A173 | A173 | L160  | M162  | V162  |
|            | e | N173    | N175 | N174 | N173 | N174 | N172 | N174 | N174 | N174 | N161  | D163  | N163  |
|            | f | A175    | A177 | A176 | A175 | A176 | A174 | A176 | A176 | A176 | A163  | G165  | G165  |
|            | g | D234    | E236 | E235 | Q234 | E235 | E233 | G235 | A235 | G235 | L209  | A215  | F211  |
| <b>S3</b>  | a | K76     | K78  | Q77  | K76  | K77  | Q75  | N77  | N77  | N77  | E59   | G62   | G62   |
|            | b | N77     | N79  | N78  | N77  | N78  | N76  | N78  | N78  | N78  | N60   | N63   | N63   |
|            | c | Y78     | N80  | T79  | Y78  | N79  | N77  | F79  | D79  | F79  | D61   | E64   | K64   |
|            | d | G82     | G83  | G83  | G82  | G83  | G81  | G83  | G83  | G83  | G65   | G68   | G68   |
|            | e | G83     | G84  | G84  | G83  | G84  | G82  | G84  | G84  | G84  | G66   | G69   | G69   |
| <b>S1'</b> | a | V150    | I152 | I151 | I150 | I151 | I149 | V15  | V151 | V151 | I135  | I137  | V138  |
|            | b | A151    | A153 | A152 | C151 | N152 | A150 | G152 | G152 | G152 | D136  | D138  | D139  |
|            | c | V152    | A154 | V153 | A152 | A153 | V151 | V153 | A153 | V153 | A137  | A139  | A140  |
|            | d | S153    | S155 | S154 | N153 | N154 | S152 | D154 | S154 | A154 | S138  | G140  | R141  |
|            | e | A157    | A159 | A158 | V157 | T158 | A156 | E158 | Q158 | E158 | Q143  | L145  | F146  |
|            | f | H174    | H176 | H175 | H174 | H175 | H173 | H175 | H175 | H175 | H162  | H164  | H164  |
|            | g | N204    | N206 | N205 | N204 | N205 | N203 | N205 | N205 | N205 | N182  | N188  | N184  |
|            | h | W206    | W208 | W207 | W206 | W207 | W205 | W207 | W207 | W207 | W184  | W190  | W186  |



428 **Table S7.** Residues with significant  $\Delta BC$  (A) and  $\Delta L$  (B). Apo systems were used as the reference structures. A cut off value of one and half  
 429 times standard deviation of the means of the difference with the various ligands used to define residues with significant changes in *average BC*  
 430 and *average L*. Residue numbering based on the catalytic domain length indicated in **Table S1**.

| <b>Protein</b> | <b>Change</b> | <b>Residues</b>                                                                                        |
|----------------|---------------|--------------------------------------------------------------------------------------------------------|
| <b>FP-2</b>    | + change      | W24, L26, V30, T31, S41, A56, I57, N60, C73, G82, P105, S147, A151, M183, I202, K203                   |
|                | - change      | R25, N38, G40, P100, P145, V179, F181, I201, S205, A235                                                |
| <b>FP-3</b>    | + change      | W47, G51, S52, L66, S68, V73, S76, D96, S110, C116, N117, L118, I148, L180, V181, A237, P240           |
|                | - change      | A39, G42, Q70, M94, G98, K128, S132, Y189, S207, G209                                                  |
| <b>VP-2</b>    | + change      | P13, K14, A21, V49, Q70, A109, V149, I1A52, F182, G183, G212, D222, I223, N224, 2G25, P229, C230, G233 |
|                | - change      | D19, E53, M71, I111, S148, F165, V180, K197, Y199, I202, V203, S206, W207                              |
| <b>VP-3</b>    | + change      | H22, W24, T31, N38, L65, E69, E101, V107, D108, L113, A152, N178, E184, Y199, K203, Q219, D221         |
|                | - change      | C42, E52, C99, T110, S147, F164, V179, E185, L202, S230                                                |
| <b>KP-2</b>    | + change      | L21, T32, Q55, P106, V135, E139, V180, A186, K197, R198, S206, Q220, T221, D231, I241                  |
|                | - change      | W25, V51, Y56, I141, D166, A176, L179, Y188, Y200, L226, T229, G233                                    |
| <b>KP-3</b>    | + change      | S40, S45, T46, V47, V70, D80, P85, V139, V147, I176, Y197, Y199, A234                                  |
|                | - change      | G36, G39, C41, V50, A150, G168, Y186, R194, R196, Y198, G236                                           |
| <b>BP-2</b>    | + change      | K12, I31, G33, S42, A49, Y56, D73, C74, E113, I141, L144, I147, A176, G181, N205, Y216, T221, I240     |
|                | - change      | D27, I32, D36, Q38, A41, V52, Q69, F90, S109, P112, P133, L179, R204, N229, P238                       |
| <b>CP-2</b>    | + change      | F23, D24, I32, S42, W44, A45, D110, D135, V151, V180, Y201, I202, S208, K220, C230, V231               |
|                | - change      | S9, S13, I31, K38, A49, I52, E139, A140, I141, T148, A150, F165, A226, N229, V233                      |
| <b>YP-2</b>    | + change      | N9, N19, I34, A47, L66, S109, P133, T147, G152, V177, I180, S206, C230, L232, I239, I240               |
|                | - change      | V51, V52, R59, S67, E91, E116, Q142, P146, T148, I149, T170, L179, R204, V231                          |
| <b>Cat-K</b>   | + change      | Y12, C22, V31, N52, D61, G64, G80, C96, K103, C155, L165, A166, A180, K191, N199, K200                 |
|                | - change      | N18, C25, G32, N47, A71, M97, N161, N201, N202, A203, G205, L209                                       |
| <b>Cat-L</b>   | + change      | E64, M71, Q76, E87, T111, I137, F153, E160, D163, E177, K187, S189, A203, K204                         |

|              |          |                                                                            |
|--------------|----------|----------------------------------------------------------------------------|
|              | - change | T15, T32, L35, G37, L54, D56, L70, P91, S134, K148, G165, L167, E174, S175 |
| <b>Cat-S</b> | + change | T14, E35, V46, D85, P91, K93, S103, R106, A107, K183, H188, C206           |
|              | - change | G23, F28, S29, A30, A36, L38, L53, K104, A108, T159, W186, G207            |
|              |          |                                                                            |
| <b>B)</b>    |          |                                                                            |
| <b>FP-2</b>  | + change | M2, A20, R25, L26-S28, D35-G40, K59, L62, G83, Y106-L113, C119, Q208-W210  |
|              | - change | N60, G82, G97, C114, D117                                                  |
| <b>FP-3</b>  | + change | D20, A39, G98, P107-C116, K119, D136                                       |
|              | - change | L66, Y227, A237                                                            |
| <b>VP-2</b>  | + change | K14-H20, G83, G84, Y107-P, F117-I119, G167, D222-R227                      |
|              | - change | S75, E113, M114, T192                                                      |
| <b>VP-3</b>  | + change | G40, E106-E112, Y158, L163, F164, G166-C168, E185-Y198, S230               |
|              | - change | T31, S74, L113, C114                                                       |
| <b>KP-2</b>  | + change | F18-Y20, D82, L114, C115, Y188-S192, E196, G209, K210, L226, T229          |
|              | - change | L21, V64, T158, L164, F165, G167, S168, E235, A236                         |
| <b>KP-3</b>  | + change | C38, G39, N59, V62, G81, G82, L97, Y105, P110, C118                        |
|              | - change | R27, E60, V109, K112, D116, R120, F133, F155, S188-K195                    |
| <b>BP-2</b>  | + change | I2-Y11, R26-Y28, I32, D36-K39, Y107-V111, N118, K119, Y188-L192            |
|              | - change | K17, N61, Q62, E113, V231                                                  |
| <b>CP-2</b>  | + change | S9, V18-Y20, I31, A33, Q37-R39, L114, S224-A226, N229                      |
|              | - change | Y11, P14-D16, A30, A33, V34, S42, D110, N118, D135                         |
| <b>YP-2</b>  | + change | Y11, P14-Q17, I32, P112, E116, T170, Y172, V231                            |
|              | - change | N19, D33, I34, D36-Q38, N61, L66, C81, N118-C120, H191, C230, L232, Q234   |
| <b>Cat-K</b> | + change | V16-Q19, G43, Q76, K77, M97, N99, G102, E115, G116, S154, K200-G205        |
|              | - change | G64, N156-D158                                                             |
| <b>Cat-L</b> | + change | Y101, N102, K104, S159, D179, G211                                         |
|              | - change | G44, I47, G62, E64, G69, E93-E96, T111, F144, E160, D163, T176, E177       |
| <b>Cat-S</b> | + change | Y101-K104, T159, Q160                                                      |
|              | - change | G20, S21, V46                                                              |

431

432

433 **Table S8.** Association of the various protein dynamic residue network metrics for proteins bound to different compounds as determined by  
 434 Pearson's correlation coefficient.

| Protein | Metric                         | SANC00 |      |      |      |      |      |      | PubChem   |           |           |
|---------|--------------------------------|--------|------|------|------|------|------|------|-----------|-----------|-----------|
|         |                                | 364    | 365  | 367  | 369  | 371  | 372  | 373  | 126461286 | 126462623 | 126465495 |
| FP-2    | <i>BC vs L<sup>-1</sup></i>    | 0.71   | 0.71 | 0.71 | 0.72 | 0.71 | 0.70 | 0.70 | 0.72      | 0.70      | 0.70      |
|         | <i>BC vs RMSF<sup>-1</sup></i> | 0.67   | 0.67 | 0.68 | 0.63 | 0.65 | 0.66 | 0.65 | 0.65      | 0.63      | 0.61      |
|         | <i>L vs RMSF</i>               | 0.76   | 0.68 | 0.78 | 0.64 | 0.74 | 0.77 | 0.70 | 0.73      | 0.77      | 0.76      |
| FP-3    | <i>BC vs L<sup>-1</sup></i>    | 0.73   | 0.72 | 0.72 | 0.72 | 0.73 | 0.73 | 0.72 | 0.72      | 0.74      | 0.73      |
|         | <i>BC vs RMSF<sup>-1</sup></i> | 0.67   | 0.64 | 0.64 | 0.64 | 0.65 | 0.65 | 0.65 | 0.64      | 0.69      | 0.65      |
|         | <i>L vs RMSF</i>               | 0.81   | 0.82 | 0.79 | 0.81 | 0.79 | 0.79 | 0.80 | 0.78      | 0.77      | 0.78      |
| VP-2    | <i>BC vs L<sup>-1</sup></i>    | 0.73   | 0.74 | 0.75 | 0.74 | 0.75 | 0.73 | 0.73 | 0.73      | 0.74      | 0.74      |
|         | <i>BC vs RMSF<sup>-1</sup></i> | 0.61   | 0.60 | 0.69 | 0.62 | 0.61 | 0.61 | 0.65 | 0.65      | 0.63      | 0.59      |
|         | <i>L vs RMSF</i>               | 0.77   | 0.75 | 0.76 | 0.73 | 0.77 | 0.74 | 0.80 | 0.77      | 0.74      | 0.75      |
| VP-3    | <i>BC vs L<sup>-1</sup></i>    | 0.74   | 0.72 | 0.74 | 0.72 | 0.75 | 0.73 | 0.73 | 0.73      | 0.74      | 0.74      |
|         | <i>BC vs RMSF<sup>-1</sup></i> | 0.63   | 0.55 | 0.64 | 0.60 | 0.59 | 0.62 | 0.58 | 0.65      | 0.63      | 0.59      |
|         | <i>L vs RMSF</i>               | 0.77   | 0.75 | 0.78 | 0.75 | 0.65 | 0.66 | 0.80 | 0.77      | 0.74      | 0.75      |
| KP-2    | <i>BC vs L<sup>-1</sup></i>    | 0.74   | 0.77 | 0.73 | 0.72 | 0.75 | 0.77 | 0.77 | 0.78      | 0.77      | 0.73      |
|         | <i>BC vs RMSF<sup>-1</sup></i> | 0.57   | 0.62 | 0.64 | 0.64 | 0.59 | 0.66 | 0.64 | 0.63      | 0.63      | 0.64      |
|         | <i>L vs RMSF</i>               | 0.75   | 0.72 | 0.78 | 0.78 | 0.76 | 0.70 | 0.72 | 0.77      | 0.68      | 0.80      |
| KP-3    | <i>BC vs L<sup>-1</sup></i>    | 0.74   | 0.74 | 0.74 | 0.74 | 0.76 | 0.74 | 0.77 | 0.75      | 0.72      | 0.74      |
|         | <i>BC vs RMSF<sup>-1</sup></i> | 0.66   | 0.63 | 0.62 | 0.61 | 0.67 | 0.63 | 0.66 | 0.66      | 0.65      | 0.65      |
|         | <i>L vs RMSF</i>               | 0.76   | 0.79 | 0.81 | 0.80 | 0.72 | 0.77 | 0.75 | 0.76      | 0.79      | 0.77      |
| BP-2    | <i>BC vs L<sup>-1</sup></i>    | 0.76   | 0.77 | 0.77 | 0.76 | 0.76 | 0.77 | 0.76 | 0.77      | 0.77      | 0.76      |
|         | <i>BC vs RMSF<sup>-1</sup></i> | 0.59   | 0.60 | 0.62 | 0.58 | 0.61 | 0.55 | 0.56 | 0.56      | 0.55      | 0.53      |
|         | <i>L vs RMSF</i>               | 0.76   | 0.71 | 0.73 | 0.75 | 0.75 | 0.72 | 0.71 | 0.69      | 0.68      | 0.72      |
| CP-2    | <i>BC vs L<sup>-1</sup></i>    | 0.76   | 0.75 | 0.75 | 0.77 | 0.76 | 0.76 | 0.76 | 0.76      | 0.77      | 0.77      |
|         | <i>BC vs RMSF<sup>-1</sup></i> | 0.58   | 0.56 | 0.63 | 0.65 | 0.61 | 0.61 | 0.63 | 0.61      | 0.63      | 0.61      |
|         | <i>L vs RMSF</i>               | 0.74   | 0.74 | 0.80 | 0.67 | 0.77 | 0.73 | 0.76 | 0.71      | 0.77      | 0.73      |
| YP-2    | <i>BC vs L<sup>-1</sup></i>    | 0.75   | 0.75 | 0.76 | 0.76 | 0.75 | 0.78 | 0.75 | 0.75      | 0.75      | 0.76      |
|         | <i>BC vs RMSF<sup>-1</sup></i> | 0.65   | 0.55 | 0.62 | 0.60 | 0.57 | 0.65 | 0.61 | 0.68      | 0.64      | 0.54      |
|         | <i>L vs RMSF</i>               | 0.76   | 0.73 | 0.75 | 0.73 | 0.72 | 0.61 | 0.71 | 0.76      | 0.75      | 0.73      |

|              |                                       |      |      |      |      |      |      |      |      |      |      |
|--------------|---------------------------------------|------|------|------|------|------|------|------|------|------|------|
| <b>Cat-K</b> | <b><i>BC vs L<sup>-1</sup></i></b>    | 0.86 | 0.86 | 0.87 | 0.87 | 0.86 | 0.87 | 0.87 | 0.88 | 0.87 | 0.86 |
|              | <b><i>BC vs RMSF<sup>-1</sup></i></b> | 0.61 | 0.66 | 0.62 | 0.64 | 0.59 | 0.64 | 0.66 | 0.61 | 0.68 | 0.64 |
|              | <b><i>L vs RMSF</i></b>               | 0.53 | 0.66 | 0.62 | 0.61 | 0.58 | 0.56 | 0.56 | 0.49 | 0.57 | 0.64 |
| <b>Cat-L</b> | <b><i>BC vs L<sup>-1</sup></i></b>    | 0.83 | 0.84 | 0.83 | 0.83 | 0.84 | 0.84 | 0.86 | 0.82 | 0.84 | 0.84 |
|              | <b><i>BC vs RMSF<sup>-1</sup></i></b> | 0.62 | 0.52 | 0.65 | 0.59 | 0.65 | 0.65 | 0.60 | 0.59 | 0.63 | 0.62 |
|              | <b><i>L vs RMSF</i></b>               | 0.69 | 0.54 | 0.70 | 0.63 | 0.66 | 0.67 | 0.68 | 0.68 | 0.69 | 0.72 |
| <b>Cat-S</b> | <b><i>BC vs L<sup>-1</sup></i></b>    | 0.86 | 0.86 | 0.87 | 0.87 | 0.87 | 0.87 | 0.87 | 0.86 | 0.87 | 0.84 |
|              | <b><i>BC vs RMSF<sup>-1</sup></i></b> | 0.52 | 0.59 | 0.54 | 0.58 | 0.59 | 0.58 | 0.62 | 0.60 | 0.59 | 0.54 |
|              | <b><i>L vs RMSF</i></b>               | 0.51 | 0.58 | 0.54 | 0.62 | 0.62 | 0.56 | 0.61 | 0.59 | 0.52 | 0.65 |

436 **Table S9.** Active compounds against FP-2 and decoys from DUD-E used for docking protocol validation.

| Nos | ACTIVE<br>Smiles                                                                          | IC50<br>[ $\mu$ m] | 2D Structure                                                                                                                                                                                                                                                                                                                                                                 |
|-----|-------------------------------------------------------------------------------------------|--------------------|------------------------------------------------------------------------------------------------------------------------------------------------------------------------------------------------------------------------------------------------------------------------------------------------------------------------------------------------------------------------------|
| 1   | <chem>CCCCOC(=O)C1C(Oc2c1c(\C=C\C(=O)OC(Cc1ccc(O)c(O)c1)C(O)=O)cc2O)c1ccc(O)c(O)c1</chem> | 3.18               | 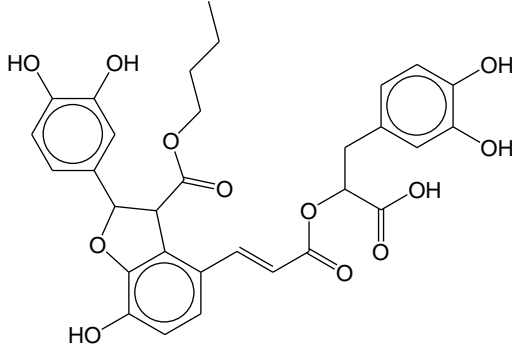 <p>The structure of compound 1 is a complex molecule featuring a central benzofuran core. It is substituted with a propyl ester group, a 3,4-dihydroxyphenyl group, and a propenoic acid derivative. The propenoic acid part is further substituted with a 3,4-dihydroxybenzyl group.</p> |
| 2   | <chem>COC(=O)C(Cc1ccc(O)c(O)c1)OC(=O)\C=C\c1ccc(O)c2OC(C(=O)OC)c12)c1ccc(O)c(O)c1</chem>  | 3.77               |  <p>The structure of compound 2 is a complex molecule featuring a benzofuran core. It is substituted with a 3,4-dihydroxyphenyl group, a propenoic acid derivative, and a 3,4-dihydroxybenzyl group. The propenoic acid part is further substituted with a 3,4-dihydroxybenzyl group.</p> |

|   |                                                                                                                           |      |                                                                                     |
|---|---------------------------------------------------------------------------------------------------------------------------|------|-------------------------------------------------------------------------------------|
| 3 | <chem>Oc1ccc(cc1)C1CCc2c(O)cc3OC4(Oc5cc(O)c(O)c5C(=O)C4(O)c3c2O1)c1ccc(O)cc1</chem>                                       | 5.23 | 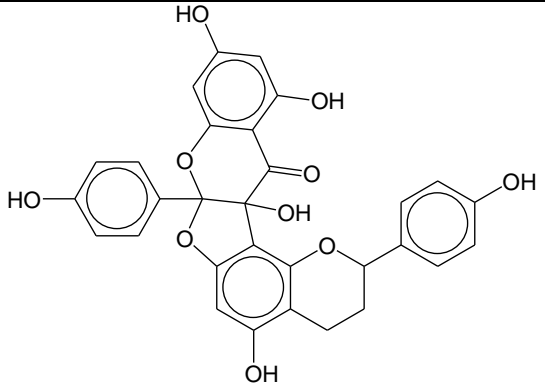  |
| 4 | <chem>CCOC(=O)c1c(O)cc(O)c2CCC(Oc12)c1ccc(O)cc1</chem>                                                                    | 9.12 |   |
| 5 | <chem>CC[C@H](C)[C@H](N(C)C)C(=O)N[C@@H](CC(C)C)C(=O)N[C@@H](CC(C)C)C(=O)N[C@@H](C)C(=O)N1C[C@@H](O)C[C@H]1C(=O)OC</chem> | 7.7  |  |

|   |                                                                                                                        |       |                                                                                     |
|---|------------------------------------------------------------------------------------------------------------------------|-------|-------------------------------------------------------------------------------------|
| 6 | <chem>CC(C)C[C@H](NC(=O)[C@H](CC(C)C)NC(=O)[C@@H]1CCCN1C)C(=O)N[C@@H](C)C=C\C(=O)N[C@@H](C)C(=O)NCc1ccccc1</chem>      | 6.0   | 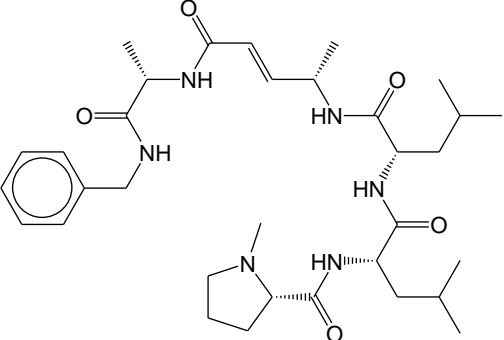  |
| 7 | <chem>COC1=CC(=O)N(C1)C(=O)C=C\C[C@H](C)NC(=O)[C@H](CC(C)C)NC(=O)[C@H](CC(C)C)NC(=O)[C@H](C(C)C)N(C)C</chem>           | 0.02  |   |
| 8 | <chem>COC1=CC(=O)N([C@H]1C(C)C)C(=O)\C=C\C[C@H](C)NC(=O)[C@H](CC(C)C)NC(=O)[C@H](CC(C)C)NC(=O)[C@H](C(C)C)N(C)C</chem> | 0.009 |  |

|    |                                                                                                                                  |       |                                                                                     |
|----|----------------------------------------------------------------------------------------------------------------------------------|-------|-------------------------------------------------------------------------------------|
| 9  | <chem>COC1=CC(=O)N([C@H]1Cc1ccc(O)cc1)C(=O)\C=C\[C@H](C)NC(=O)[C@H](CC(C)C)NC(=O)[C@H](CC(C)C)N(C)C</chem>                       | 0.005 | 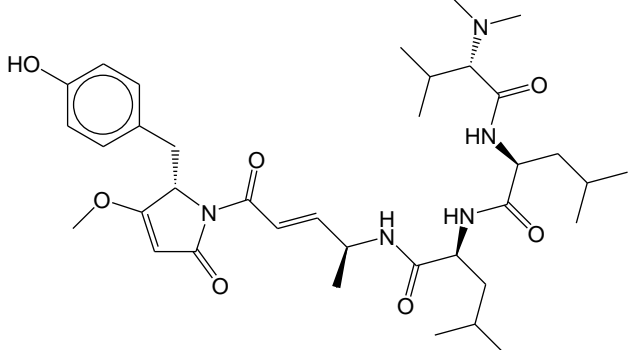  |
| 10 | <chem>COC1=CC(=O)N([C@H]1Cc1c[nH]c2ccccc12)C(=O)\C=C\[C@H](C)NC(=O)[C@H](CC(C)C)NC(=O)[C@H](C(C)C)NC(=O)[C@H](C(C)C)N(C)C</chem> | 0.01  |   |
| 11 | <chem>CC(C)C[C@H](NC(=O)[C@H](CC(C)C)NC(=O)[C@H](C(C)C)N(C)C)C(=O)N[C@@H](C)\C=C\C(=O)N1CC(OCc2ccccc2)=CC1=O</chem>              | 0.009 |  |



|    |                                                                                                                               |       |                                                                                     |
|----|-------------------------------------------------------------------------------------------------------------------------------|-------|-------------------------------------------------------------------------------------|
| 12 | <chem>CC(C)C[C@H](NC(=O)[C@H](CC(C)C)NC(=O)[C@H](C(C)C)N(C)C(=O)N[C@@H](C)\C=C\C(=O)N1[C@@H](C(C)C)C(OCc2ccccc2)=CC1=O</chem> | 0.006 | 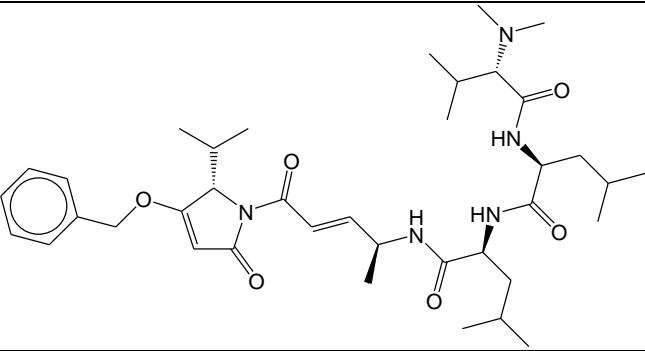  |
| 13 | <chem>CC1CC(NCS(=O)(=O)c2ccccc2)C(=O)N(C\C=C\S(=O)(=O)c2ccccc2)C1</chem>                                                      | 0.14  |   |
| 14 | <chem>CC(C)CC(NCC(=O)N1CCN(C)CC1)C(=O)N[C@@H](CCc1ccccc1)\C=C\S(=O)(=O)NOCc1ccccc1</chem>                                     | 0.002 |  |

|    |                                                                                                  |        |                                                                                     |
|----|--------------------------------------------------------------------------------------------------|--------|-------------------------------------------------------------------------------------|
| 15 | <chem>CC1CC(NCC(=O)NCCN2CCOCC2)C(=O)N(C1)[C@@H](CCc1ccc1)\C=C\S(=O)(=O)NOc1ccccc1</chem>         | 0.014  | 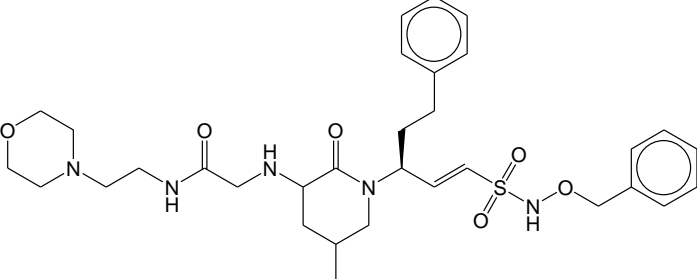  |
| 16 | <chem>CC1CC(NCC(=O)NCCCOC)C(=O)N(C1)[C@@H](CCc1ccccc1)\C=C\S(=O)(=O)NOc1ccccc1</chem>            | 0.016  |   |
| 17 | <chem>CCOC(=O)C1CCN(CC1)C(=O)CNC1CC(C)CN([C@@H](CCc2ccccc2)\C=C\S(=O)(=O)NO)C2CCCCC2)C1=O</chem> | 0.0022 |  |

|    |                                                                                                    |        |                                                                                     |
|----|----------------------------------------------------------------------------------------------------|--------|-------------------------------------------------------------------------------------|
| 18 | <chem>CC1CC(NCC(=O)NS(=O)(=O)c2ccccc2)C(=O)N(C1)[C@@H](CCc1ccccc1)\C=C\S(=O)(=O)NOCc1ccccc1</chem> | 0.016  | 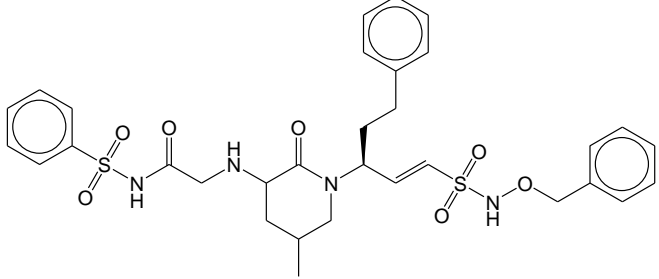  |
| 19 | <chem>CC(C)CC(NC(=O)N1CCOCC1)C(=O)NC(CCc1ccccc1)\C=C\S(=O)(=O)Oc1ccc(F)cc1</chem>                  | 0.0007 |   |
| 20 | <chem>CC(C)CC(NC(=O)N1CCN(C)CC1)C(=O)NC(CCc1ccccc1)\C=C\S(=O)(=O)Oc1ccc(F)cc1</chem>               | 0.021  |  |

|    |                                                                                             |        |                                                                                      |
|----|---------------------------------------------------------------------------------------------|--------|--------------------------------------------------------------------------------------|
| 21 | <chem>CCOC(=O)C1CCN(CC1)C(=O)NC(CC(C)C)C(=O)NC(CCc1ccccc1)\C=C\S(=O)(=O)Oc1ccc(F)cc1</chem> | 0.0009 | 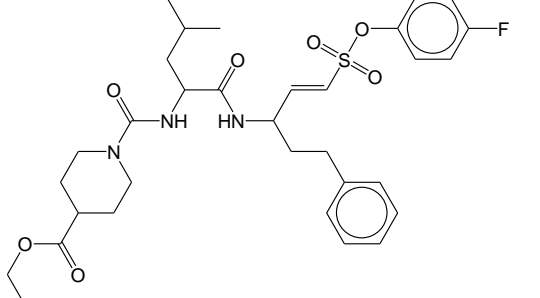   |
| 22 | <chem>CC(C)CC(NC(=O)N1CCOCC1)C(=O)NC(CCc1ccccc1)\C=C\S(=O)(=O)Oc1ccccc1</chem>              | 0.0007 |    |
| 23 | <chem>CC(C)CC(NC(=O)N1CCN(C)CC1)C(=O)NC(CCc1ccccc1)\C=C\S(=O)(=O)Oc1ccccc1</chem>           | 0.35   |   |
| 24 | <chem>CCOC(=O)C1CCN(CC1)C(=O)NC(CC(C)C)C(=O)NC(CCc1ccccc1)\C=C\S(=O)(=O)Oc1ccc1</chem>      | 0.0007 |  |

|    |                                                                                    |        |                                                                                      |
|----|------------------------------------------------------------------------------------|--------|--------------------------------------------------------------------------------------|
| 25 | <chem>CC(C)CC(NC(=O)N1CCC1CO)C(=O)NC(Cc1ccccc1)\C=C\S(=O)(=O)Oc1ccccc1</chem>      | 0.0008 | 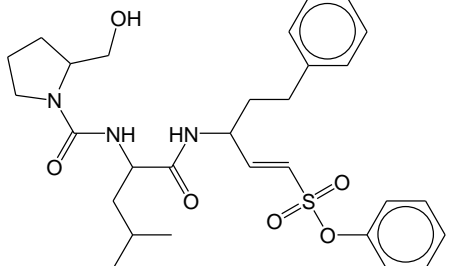   |
| 26 | <chem>CC(C)CC(NC(=O)N1CCC1CO)C(=O)NC(Cc1ccccc1)\C=C\S(=O)(=O)Oc1ccc(F)cc1</chem>   | 0.0009 |    |
| 27 | <chem>COc1ccc(OS(=O)(=O)\C=C\C(Cc2ccccc2)NC(=O)C(CC(C)C)NC(=O)N2CCCC2CO)cc1</chem> | 0.0009 |   |
| 28 | <chem>[O-][N+](=O)c1ccc(c1)C(=O)\C=C\c1ccc2OCOc2c1</chem>                          | 8.5    |  |

|    |                                                                                                  |     |                                                                                    |
|----|--------------------------------------------------------------------------------------------------|-----|------------------------------------------------------------------------------------|
| 29 | <chem>COc1cc(OC)c(\C=C\C(=O)c2cccc(c2)[N+](=[O-])=O)cc1OC</chem>                                 | 9.5 | 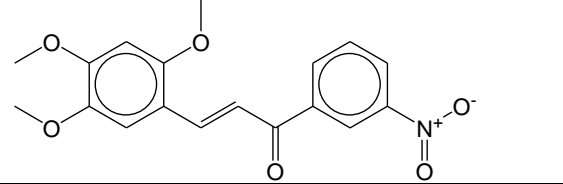 |
| 30 | <chem>CC1CCc2c(C1)nc1ccc(cc1c2NCCCCCNc1c2CCC(C)Cc2nc2ccc(cc12)[N+](=[O-])=O)[N+](=[O-])=O</chem> | 5.2 |  |

**DUD-E Decoys**

|    |                                                                                                                                    |
|----|------------------------------------------------------------------------------------------------------------------------------------|
| 1  |                                                                                                                                    |
| 2  | <chem>c1cc(ccc1C(=O)OCC(=O)c2ccc(cc2)Cl)NC(=O)CCCC(=O)OCC(=O)c3ccc(cc3)Cl</chem>                                                   |
| 3  | <chem>COc1ccc(cc1OC)CN(CCC2=CCCCC2)S(=O)(=O)c3ccc(cc3)S(=O)(=O)NC4CCCCC4</chem>                                                    |
| 4  | <chem>CCOC(=O)CSc1nnc(n1c2ccc(cc2)OC)CSc3[nH]c(c(n3)c4cccc4)c5ccccc5</chem>                                                        |
| 5  | <chem>CCOC(=O)c1c(c(sc1NC(=O)CSc2nc3c(c(cs3)c4ccco4)c(=O)n2CC=C)C(=O)OCC)C</chem>                                                  |
| 6  | <chem>Cc1ccccc1OCc2nnc(n2C)SCC(=O)Nc3ccc4c(c3)sc(n4)SCC(=O)Nc5ccc(cc5)C(=O)OC</chem>                                               |
| 7  | <chem>CC1=NC(=C)C([C@@H]([C@@H]1C(=O)OC[C@H]2CCCO2)c3ccccc3[N+](=O)[O-])C(=O)OCCNC(=O)c4cccc4O</chem>                              |
| 8  | <chem>CC1=NC(=C)C([C@H](C1C(=O)OC[C@H]2CCCO2)c3ccccc3[N+](=O)[O-])C(=O)OCCNC(=O)c4cccc4O</chem>                                    |
| 9  | <chem>CCOc1cc(ccc1OCCOc2ccc(cc2)Br)/C=N/Nc3cc(nc(n3)N4CCCC4)N5CCCC5</chem>                                                         |
| 10 | <chem>Cc1cc(nc(n1)SCC(=O)N(Cc2ccc(cc2)F)[C@H](c3ccc(c(c3)OC)OC)C(=O)Nc4ccc(cc4)N(C)C)C</chem>                                      |
| 11 | <chem>CN(C)c1ccc(cc1)NC(=O)[C@@H](c2cc(c(c2)OC)OC)OC)N(Cc3ccccc3)C(=O)Cn4c5ccccc5nn4</chem>                                        |
| 12 | <chem>COCCOc1cc(c(cc1Cl)Cl)N(CC(=O)Nc2cccc(c2)C(F)(F)F)S(=O)(=O)c3ccc(cc3)OC</chem>                                                |
| 13 | <chem>COc1cc(ccc1OC)OC)Nc2nc(nc(n2)OC(C(F)(F)F)C(F)(F)F)OC(C(F)(F)F)C(F)(F)F</chem>                                                |
| 14 | <chem>CCOc1ccc(cc1OCC)CCNS(=O)(=O)c2cc(ccc2C)C3=NN[C@@H](c4c3cccc4)Nc5ccc6c(c5)OCO6</chem>                                         |
| 15 | <chem>CC(C)(C)C(=O)OC[C@@H]1[C@H]([C@@H]([C@@H]([C@@H]([C@@H](O1)NC(=O)c2cccn2)OC(=O)C(C)(C)C)OC(=O)C(C)(C)C)OC(=O)C(C)(C)C</chem> |
| 16 | <chem>CCCCCCCC[C@]12O[C@@H]3[C@@H]4C5[C@](O5)([C@H]([C@]6([C@@H]([C@@]4)O1)[C@@H]([C@]3(O2)C(=C)C)C)C=C(C6=O)C)O)CO</chem>         |
| 17 | <chem>CCSCCOC(=O)C1=C(NC2=C([C@@H]1c3ccc(c(c3OC)OC)OC)C(=O)C[C@@H](C2)c4ccccc4OC)C</chem>                                          |
| 18 | <chem>CCSCCOC(=O)C1=C(NC2=C([C@@H]1c3ccc(c(c3OC)OC)OC)C(=O)C[C@H](C2)c4ccccc4OC)C</chem>                                           |
| 19 | <chem>C[C@@H](C(=O)c1ccccc1)OC(=O)c2ccc(cc2)NC(=O)CCCC(=O)OCC(=O)c3ccc(cc3)Br</chem>                                               |
| 20 | <chem>CCOc1ccc(cc1)n2c(nnc2SCC(=O)Nc3ccc(cc3OC)OC)COc4ccc(cc4)Cl</chem>                                                            |
| 21 | <chem>CCN(CC)c1ccc(cc1)NC(=O)CSc2nnc(n2c3ccc(cc3)OCC)COc4ccc(cc4)Cl</chem>                                                         |
| 22 | <chem>CC(=O)Oc1c(cc(cc1OC)/C=N\NC(=O)CSc2nnc(s2)SCc3ccccc3Cl)OC</chem>                                                             |
| 23 | <chem>COCCN(CCOC)S(=O)(=O)c1ccc(cc1)C(=O)Nc2nc(cs2)c3ccc(cc3)Oc4ccccc4</chem>                                                      |
| 24 | <chem>COc1ccc(cc1)CCCc2nnc(o2)SCC(=O)N/N=C/c3ccc(c(c3)OC)OCc4ccccc5c4ccccc5</chem>                                                 |

|    |                                                                                                            |
|----|------------------------------------------------------------------------------------------------------------|
| 24 | CCOC(=O)c1ccc(cc1)c2ccc(o2)/C=N/Nc3nc(nc(n3)Nc4ccc(cc4)OC)NCc5ccco5                                        |
| 25 | CCCCN(CC)S(=O)(=O)c1ccc(cc1)C(=O)Nc2nnc(o2)c3cc(c(c(c3)OCC)OCC)OCC                                         |
| 26 | CC[C@ @H]1CCCCN1S(=O)(=O)c2ccc(cc2)C(=O)Nc3nnc(o3)c4cc(c(c(c4)OCC)OCC)OCC                                  |
| 27 | CCOc1cc(ccc1OCC=C)[C@ @H]2C(=C(C(=O)N2c3nnc(s3)SCc4cccc4F)O)C(=O)c5ccc6c(c5)C[C@H](O6)C                    |
| 28 | CCCCCCCCCCCCSc1nc2c(n1C[C@H](COc3ccc(cc3)Cl)O)c(=O)[nH]c(=O)n2C                                            |
| 29 | CC(C)(C)c1ccc(cc1)c2nnc(n2c3cccc3)SCC(=O)Nc4ccc5c(c4)sc(n5)SCC(=O)NC[C@ @H]6CCCCO6                         |
| 30 | c1ccc(cc1)C(=O)Nc2c(cn(c(=O)n2)[C@H]3[C@H]([C@ @H]([C@ @H](O3)COC(=O)c4cccc4)OC(=O)c5cccc5)OC(=O)c6cccc6)F |
| 31 | COc1ccc(cc1)NC(=O)CCCCn2c(=O)c3c(ccs3)nc2SCC(=O)Nc4ccc(cc4OC)OC                                            |
| 32 | CCC(C)(C)[C@H]1CCc2c(sc(c2C(=O)OC)NC(=O)CCCS(=O)(=O)c3nc(cc(n3)C(F)(F)F)c4cccc4OC)C1                       |
| 33 | Cc1ccc(cc1)Cn2ccc(n2)NC(=O)CCCS(=O)(=O)c3nc(cc(n3)C(F)(F)F)c4ccc(c(c4)OC)OC                                |
| 34 | CCCCOc1ccc(c(c1)C)c2c(cn(n2)c3cccc3)C4C(=C(NC(=C4C(=O)OCCOC)C)C)C(=O)OCCOC                                 |
| 35 | CCCOc1ccc(c(c1)C)c2c(cn(n2)c3cccc3)C4C(=C(NC(=C4C(=O)OCCOC)C)C)C(=O)OCCOC                                  |
| 36 | CC[NH+](CC)CCN1[C@H](C(=C(C1=O)[O-])C(=O)c2ccc(cc2)OCC=C)c3cc(c(c(c3)Br)O)OC                               |
| 37 | CCCOP(=O)(c1c(oc(n1)Cc2cccc3c2cccc3)NCCc4ccc(c(c4)OC)OC)OCCC                                               |
| 38 | CCCOc1ccc(cc1)C(=O)Oc2ccc(cc2OC)/C=N/NC(=O)[C@H](C)Oc3ccc(cc3)Br                                           |
| 39 | CCCOc1ccc(cc1)C(=O)Oc2ccc(cc2OCC)/C=N/NC(=O)C(=O)Nc3ccc(cc3)Br                                             |
| 40 | CCOc1cc(ccc1O)/C=N/NC(=O)CSc2nnc(n2c3cccc3)c4cc(c(c(c4)OC)OC)OC                                            |
| 41 | CCCOc1ccc(cc1)C(=O)Oc2ccc(cc2OCC)/C=N/NC(=O)CNC(=O)c3ccc(c(c3)OC)OC                                        |
| 42 | CCCOc1ccc(cc1)C(=O)Oc2ccc(cc2OCC)/C=N/NC(=O)C(=O)Nc3ccc(c(c3)Cl)Cl                                         |
| 43 | CCCOc1ccc(cc1)C(=O)Oc2ccc(cc2OCC)/C=N/NC(=O)c3cccc3NS(=O)(=O)c4ccc(cc4)Cl                                  |
| 44 | Cc1ccc(cc1)NC(=O)CN2c3cccc3/C(=C/4C(=O)N(C(=S)S4)CCCCCCCCC(=O)O)/C2=O                                      |
| 45 | CCCCCCCCCN1C(=O)/C(=C/2\c3cccc3N(C2=O)CC(=O)Nc4ccc(cc4OC)OC)/SC1=S                                         |
| 46 | CCCOc1ccc(cc1)C(=O)NCC(=O)N/N=C/c2cc(ccc2OC(=O)c3ccc(cc3)C)Br                                              |
| 47 | Cc1ccc(c(c1)c2c(cn(n2)c3cccc3)C4C(=C(NC(=C4C(=O)OCCOC)C)C)C(=O)OCCOC)C                                     |
| 48 | CCCOc1ccc(cc1)C(=O)Oc2ccc(cc2)/C=N/NC(=O)C(=O)Nc3cccc3C(=O)Nc4cccc(c4)C                                    |
| 49 | CC1=C(C(C(=C(N1)C)C(=O)OCC=C)c2cn(nc2c3ccc(c(c3)Cl)OC)c4cccc4)C(=O)OCC=C                                   |
| 50 | COc1ccc(cc1)c2nnc(n2c3ccc(cc3)OC)SCC(=O)N/N=C/c4ccc(c(c4OC)OC)OC                                           |
| 51 | CCCN(CCC)S(=O)(=O)c1ccc(cc1)C(=O)Nc2ccc(cc2)S(=O)(=O)Nc3cc(on3)C                                           |
| 52 | COc1ccc(cc1OC)c2nnc(n2CC=C)NCC(=O)Nc3ncc(s3)Cc4ccc(cc4)F                                                   |
| 53 | CCCC(=O)Nc1nnc(s1)SCC(=O)Nc2c(c(c(s2)C(=O)OCC)C)C(=O)OCC                                                   |
| 54 | c1ccc(cc1)OCCOc2ccc(cc2)C(=O)NC(=S)Nc3cccc(c3)C(=O)NC4CCCC4                                                |
| 55 | Cn1c(nnc1SCC(=O)Nc2ccc(cc2)OC(F)(F)F)CSCC(=O)Nc3cccc3                                                      |
| 56 | CC[C@ @H](C)c1ccc(cc1)N([C@H](c2ccco2)C(=O)NC(C)(C)CC)C(=O)CNC(=O)c3cccc3                                  |
| 57 | Cc1cc2cc(c(=O)[nH]c2cc1C)CN(Cc3cccnc3)C(=S)NCCc4ccc(c(c4)OC)OC                                             |
| 58 | CCOCCn1c2ccc(cc2s/c1=N\C(=O)CCSc3ccc(cc3)OC)S(=O)(=O)N                                                     |
| 59 | CN(c1cccc1)C(=O)c2cccc(c2)NC(=S)NC(=O)c3cccc(c3)OCCOc4cccc4                                                |
| 60 | c1ccc(cc1)C(=O)Nc2ccc(cc2)NC(=S)NC(=O)c3cccc(c3)OCCOc4cccc4                                                |
| 60 | CCOc1cc(cc(c1OCC)OCC)C(=O)N/N=C(/C)\c2ccc(cc2)NC(=O)c3ccc(s3)C                                             |

|    |                                                                                              |
|----|----------------------------------------------------------------------------------------------|
| 61 | <chem>CCc1ccc(c(c1)Br)OCC(=O)NNC(=S)NC(=O)COc2ccc(cc2)C(C)(C)C</chem>                        |
| 62 | <chem>Cc1cc(cc(c1Cl)C)OCC(=O)NNC(=S)NC(=O)CCCOc2ccc(cc2Cl)Cl</chem>                          |
| 63 | <chem>CCCOC(=O)c1ccc(cc1)OCC(=O)NNC(=S)NC(=O)c2ccc(c(c2)Br)C</chem>                          |
| 64 | <chem>Cc1cc(nc(n1)N/C(=N/C(=S)Nc2ccc(cc2)Nc3ccccc3)/NCc4ccc(cc4)OC)C</chem>                  |
| 65 | <chem>CCCOc1ccccc1C(=O)NNC(=S)NC(=O)c2ccc(c(c2)Br)OCC(C)C</chem>                             |
| 66 | <chem>CC[C@H](C)c1ccc(cc1)OCC(=O)NNC(=S)NC(=O)c2cc(ccc2OCC)Br</chem>                         |
| 67 | <chem>Cc1ccc(c(c1)C)NS(=O)(=O)c2ccc(cc2)NC(=S)NC(=O)c3ccccc3OCCOC</chem>                     |
| 68 | <chem>Cc1ccccc1NS(=O)(=O)c2ccc(cc2)NC(=S)NC(=O)c3ccccc3OCCOC)C</chem>                        |
| 69 | <chem>COCCOc1ccc(cc1Br)C(=O)NC(=S)Nc2ccc(cc2)OC[C@H]3CCCO3</chem>                            |
| 70 | <chem>Cc1ccc(c(c1)C)OCC(=O)NNC(=S)NC(=O)c2cc(ccc2OCCOC)Br</chem>                             |
| 71 | <chem>c1cc(cc(c1)NC(=S)NC(=O)CCCOc2ccc(cc2Cl)Cl)C(=O)NC[C@H]3CCCO3</chem>                    |
| 72 | <chem>CC1=C([C@@H](C(=C(N1)C)C(=O)OCCOc2ccc(cc2)NC(=O)C)c3ccc(s3)[N+](=O)[O-])C(=O)OC</chem> |
| 73 | <chem>CCCOc1ccc(cc1)C(=O)NC(=S)Nc2ccc(cc2)NC(=O)[C@@H](C)Oc3ccccc3Cl</chem>                  |
| 74 | <chem>CCCSs1nc2ccc(cc2s1)NC(=O)CSc3nc([nH]n3)N/N=C/C=C/c4ccccc4</chem>                       |
| 75 | <chem>CCOc1ccc2c(c1)sc(n2)NC(=O)CSc3nc([nH]n3)N/N=C/C=C/c4ccc(cc4)C(=O)OC</chem>             |
| 76 | <chem>CCCSs1nnc(s1)NC(=O)CSc2nnc(n2N)N/N=C/C3CCCC4C3CCCC4</chem>                             |
| 77 | <chem>C=CCc1cccc(c1O)/C=N/Nc2[nH]nc(n2)SCCC(=O)NC(c3ccccc3)c4ccccc4</chem>                   |
| 78 | <chem>CCOC(=O)C1=C(NC(=O)N[C@H]1c2ccc(o2)C)COC(=O)CCc3ncc(o3)c4c(cccc4F)F</chem>             |
| 79 | <chem>CCCCNC(=O)[C@@H](c1c(cccc1Cl)Cl)N(Cc2ccc(o2)C(=O)CNC(=O)c3ccccc3</chem>                |
| 80 | <chem>CC[C@H](C)NC(=O)Cn1c2ccsc2c(=O)n(c1=O)CCCCC(=O)NCc3ccccc3Cl</chem>                     |
| 81 | <chem>CCCOc1ccc(cc1OCC)[C@H]2c3ccc(cc3OC(=C2C#N)N)OC(=O)COc4ccc(cc4)C</chem>                 |
| 82 | <chem>CCOc1ccc(cc1)n2c(nnc2SCC(=O)N/N=C/C3CCCC(c3O)CC=C)c4ccccc4</chem>                      |
| 83 | <chem>CCCCCOc1ccc(cc1)NC(=O)C[C@H]2C(=O)N(C(=S)N2NC(=O)c3ccc(cc3)Cl)C</chem>                 |
| 84 | <chem>CCCCSc1ccccc1NC(=O)CSc2nc([nH]n2)N/N=C/C3CCCC(c3)Br</chem>                             |
| 85 | <chem>CN(C)c1ccc(cc1)/C=N/Nc2[nH]nc(n2)SCC(=O)Nc3ccccc3SCc4ccccc4</chem>                     |
| 86 | <chem>CCCCSc1nnc(s1)NC(=O)CSc2nc([nH]n2)N/N=C/C3ccc(cc3Cl)Cl</chem>                          |
| 87 | <chem>CCCCSc1ccccc1NC(=O)CSc2nc([nH]n2)N/N=C/C3ccc(cc3)Br</chem>                             |
| 88 | <chem>COc1ccccc1/C=N/Nc2[nH]nc(n2)SCC(=O)Nc3ccc4c(c3)sc(n4)SCC=C</chem>                      |
| 89 | <chem>CCOC(=O)c1c(c(c(s1)NC(=O)CSc2nc([nH]n2)N/N=C(/C)\c3ccc(cc3)OC)C#N)C</chem>             |
| 90 | <chem>Cc1ccccc1C(=O)NCCc2nnc(n2CC=C)SCC(=O)Nc3nc(cs3)c4ccccc4</chem>                         |
| 91 | <chem>COC(=O)c1ccccc1NC(=O)CSc2nnc(n2CC=C)CCNC(=O)c3ccccc3Cl</chem>                          |
| 92 | <chem>CCN(CC)C(=O)c1c(c(c(s1)NC(=S)Nc2ccn(n2)Cc3ccccc3Cl)C(=O)OC)C</chem>                    |
| 93 | <chem>CCN(CC)C(=O)c1c(c(c(s1)NC(=S)Nc2ccc(c2)Cn3c(cc(n3)C)C)C(=O)OC)C</chem>                 |
| 94 | <chem>CCN(CC)C(=O)c1c(c(c(s1)NC(=S)Nc2c(cn(n2)Cc3ccccc3)Cl)C(=O)OC)C</chem>                  |
| 95 | <chem>CCOc1ccccc1NC(=O)CCSc2nnc(n2c3ccccc3)CNc4cccc5c4cccc5</chem>                           |
| 96 | <chem>CCOc1ccccc1NC(=O)CCSc2nnc(n2c3ccccc3)CNc4ccc(cc4)Cl</chem>                             |
| 97 | <chem>CCc1ccccc1N(CC(=O)N/N=C/C2ccc(cc2)OCC(=O)Nc3ccc(cc3)C)S(=O)(=O)C</chem>                |
| 97 | <chem>CCCCOC(=O)c1ccc(cc1)NC(=O)C[C@H]2C(=O)Nc3n2nc(c3c4ccc(cc4)Cl)COC</chem>                |





|     |                                                                                                       |
|-----|-------------------------------------------------------------------------------------------------------|
| 135 | C[C@H](c1ccc2ccccc2c1)NC(=O)CN(CCn3cccn3)CC(=O)N[C@H](C)c4ccc5ccccc5c4                                |
| 136 | Cc1ccc(cc1C)c2csc3c2c(=O)[nH]c(n3)CN(Cc4ccco4)C[C@H](COc5ccccc5)O                                     |
| 137 | CCSCCOC(=O)C1=C(NC2=C([C@@H]1c3cc(c(c3)OC)O)[N+](=O)[O-])C(=O)[C@H]([C@@H](C2)C)C(=O)OC)C             |
| 138 | COC(=O)Cc1c(c(=O)n([nH]1)c2ccccc2)[C@@H](c3ccc(cc3Cl)Cl)c4c(nn(c4O)c5ccccc5)CC(=O)OC                  |
| 139 | CC[NH+](CC)CCCN1[C@@H](C(=C(C1=O)[O-])C(=O)c2c(c([nH]c2C)C(=O)OC)C)c3ccc(cc3)Br                       |
| 140 | CCOc1ccc(cc1)NC(=O)CSc2nnc(n2c3ccccc3OC)CNC(=O)c4ccccc4F                                              |
| 141 | CCSc1nnc(s1)NC(=O)CSc2nnc(n2c3ccccc3)C(F)(F)F)CNC(=O)c4cccc(c4)C                                      |
| 142 | Cc1ccc(c(c1)n2c(nnc2SCC(=O)Nc3ccc(cc3)OC)CNC(=O)c4ccc(cc4)S(=O)(=O)N(C)C)C                            |
| 143 | COc1ccc(cc1)NC(=O)CSc2nnc(n2c3cc(ccc3OC)OC)CNC(=O)c4cccs4                                             |
| 144 | Cc1ccc(cc1)[C@@H]2C(=C(NC(=C2C(=O)OCC=C)C)SCC(=O)Nc3cc(c(cc3OC)Cl)OC)C#N                              |
| 145 | Cc1ccc(cc1)[C@H]2C(=C(NC(=C2C(=O)OCC=C)C)SCC(=O)Nc3cc(c(cc3OC)Cl)OC)C#N                               |
| 146 | c1cc(cc(c1)F)C(=O)Nc2ccc(cc2)OCCOCCOc3ccc(cc3)NC(=O)c4cccc(c4)F                                       |
| 147 | CCOc1ccc(cc1)NC(=O)CSc2nnc(n2c3ccccc3)C)CNC(=O)c4cccc(c4C)[N+](=O)[O-]                                |
| 148 | CCOc1ccc(cc1)C(=O)Oc2ccc(cc2/C=N/NC(=O)CNC(=O)c3ccc(cc3)OC)Br                                         |
| 149 | C[C@@]12CC[C@H]([C@@])([C@@H]1CC[C@H]([C@H]2CC(=O)NCc3ccc4c(c3)OCO4)O)(C)CO)OC(=O)Nc5cc(c(c5)OC)OC)OC |
| 150 | CCOc1ccc(cc1)N(CC(=O)Nc2ccc(cc2)NC(=O)C)S(=O)(=O)c3ccc(c(c3)OC)OC                                     |
| 151 | Cc1ccc(o1)c2csc(n2)NC(=O)CCCCCCCC(=O)Nc3nc(cs3)c4ccc(o4)C                                             |
| 152 | CC(C)(C)c1ccc(cc1)C(=O)Nc2ccc(cc2)C(=O)NNC(=S)NC(=O)CCC(=O)OCCOC                                      |
| 153 | Cc1ccc(c(c1)NC(=O)CCC(=O)NNC(=S)NC(=O)CCCOc2ccc(cc2Cl)Cl)C                                            |
| 154 | CCCCCOc1ccc(cc1)OCCOc2ccc(cc2OC)/C=N/NC(=O)Cc3nnc(s3)N                                                |
| 155 | CC(C)c1ccc(c(c1)Br)OCC(=O)NNC(=S)NC(=O)c2ccc(cc2)OCCOC                                                |
| 156 | CC(C)c1ccc(cc1)OCC(=O)NNC(=S)NC(=O)c2cc(ccc2OCCOC)Br                                                  |
| 157 | COc1ccccc1NCc2nnc(n2c3ccccc3)SCCC(=O)Nc4ccc(c(c4)OC)Cl                                                |
| 158 | CCCN1C(=C([C@@H](NC1=O)c2ccc(cc2)NC(=O)Nc3cc(cc3)OC)OC)C(=O)OCC(C)C)C                                 |
| 159 | CCCN1C(=C([C@@H](NC1=O)c2ccc(cc2)NC(=O)Nc3cc(cc3)OC)OC)C(=O)OCC(C)C)C                                 |
| 160 | Cc1ccc(o1)CN([C@@H](c2c(cc(cc2O)O)O)C(=O)NC(C)(C)CC(C)(C)C)C(=O)CCC3CCCCC3                            |
| 161 | CCc1ccc(cc1)NC(=O)Cn2c3ccccc3c(=O)n(c2=O)CCCC(=O)Nc4ccccc4OC                                          |
| 162 | CCCOc1ccc(cc1)C(=O)Oc2ccc3c(c2)OC(=C([C@H]3c4ccc(c(c4)OC)OCC(C)C)C#N)N                                |
| 163 | CC(C)COc1ccc(cc1OC)[C@@H]2c3ccc(cc3OC(=C2C#N)N)OC(=O)c4ccc(cc4)OCC=C                                  |
| 164 | C[C@H](CNC(=O)c1ccc(cc1)C(=O)N(C(C)C)C(C)C)NC(=O)c2ccc(cc2)C(=O)N(C(C)C)C(C)C                         |
| 165 | CCCCCOc1ccc(cc1OC)[C@H]2c3c(n[nH]c3C(=O)N2C4ccco4)c5cc(cc(c5O)C)C                                     |
| 166 | CCCCCOc1ccc(cc1OC)[C@H]2c3c(n[nH]c3C(=O)N2C[C@@H]4CCCO4)c5c(cc(cc5O)C)C                               |
| 167 | CCCOc1ccc(cc1OC)[C@H]2C(=C(Nc3n2nc(n3)SCCC)C)C(=O)Nc4ccccc4OC                                         |
| 168 | CCOc1ccc(cc1)/N=C(/Nc2[nH]c(cc(=O)n2)CSc3nnnn3c4ccccc4)\NC(=O)c5ccccc5                                |
| 169 | CCCOc1cc(ccc1OCc2ccccc2Cl)/C=N/NC(=O)Cc3nnc(s3)NC(=O)c4ccccc4C                                        |
| 170 | CCCCOc1ccc(cc1OCC)[C@@H]2C(=C(Nc3n2nc(n3)SCC)C)C(=O)Nc4ccccc4C)C                                      |
| 171 | CCCSs1nc2ccc(cc2s1)NC(=O)CSc3nc([nH]n3)N/N=C(/CC)lc4ccccc4                                            |
| 171 | CCOc1ccc(cc1OCC)CC/C(=N)O[C@@](C(=O)OC)(C(F)(F)F)NC(=O)c2ccc(cc2)C)/N                                 |

|     |                                                                                                                             |
|-----|-----------------------------------------------------------------------------------------------------------------------------|
| 172 | CCN(CC)c1ccc(cc1)n2nc3cc(c(cc3n2)NC(=S)NC(=O)c4cccc(c4)OCC(C)C)C                                                            |
| 173 | CCOc1ccc(cc1)NCc2nnc(n2c3cccc3)SCC(=O)Nc4ccc(c(c4)Cl)OC                                                                     |
| 174 | CCOc1ccc(cc1)NC(=O)CSc2nnc(n2CC=C)CNC(=O)c3cccc3Br                                                                          |
| 175 | CN(C)S(=O)(=O)N(CC(=O)Nc1ccc(cc1)S(=O)(=O)Nc2ccc(cc2OC)OC)c3cccc3                                                           |
| 176 | Cc1ccc(cc1)S(=O)(=O)N(CC(=O)Nc2ccc(cc2)S(=O)(=O)Nc3c(ccc3C)C)c4cc(ccc4OC)OC                                                 |
| 177 | CC[C@H](C)C(=O)O[C@@H]1C[C@H]2[C@@]([C@@H])([C@@H])([C@@H])([C@@]23[C@@H](O[C@@H](C3=C1)OC(=O)C)OC(=O)C)O)C(C)C/C=C(\C)/C=C |
| 178 | CCOc1cc(ccc1OCCC(C)C)[C@H]2c3c([nH]nc3C(=O)N2CCOC)c4cc(ccc4O)Cl                                                             |
| 179 | CCOc1cc(ccc1OCC=C)[C@@H]2c3c([nH]nc3C(=O)N2CCOC(C)C)c4cc(ccc4O)Cl                                                           |
| 180 | CC(C)(C(=O)O)[C@H]1[C@H]([C@@H])([C@@H])([C@H](O1)C(=O)OCC=C)O)O)Oc2ccc(cc2)C(=O)c3ccc(cc3)Cl                               |
| 181 | Cc1cnc(nc1Nc2cccc(c2)S(=O)(=O)NC(C)(C)C)Nc3ccc(cc3)OCCN4CCCC4                                                               |
| 182 | CC(C)OC[C@H](CN(Cc1cccc1)C2[nH]c(=O)c3c(csc3n2)c4ccc(c(c4)OC)OC)O                                                           |
| 183 | CCN(CC)CCNC(=O)/C=C\c1cn(c2c1cccc2)S(=O)(=O)N(C)C)/NC(=O)c3cccc3F                                                           |
| 184 | c1ccc(cc1)c2ccc(cc2)OCC(=O)NNC(=S)NC(=O)c3cccc3OCCOc4cccc4                                                                  |
| 185 | CCOc1cc(cc(c1OCC)OCC)C(=O)Nc2nnc(s2)SCC(=O)Nc3ccc(cc3C)C                                                                    |
| 186 | c1cc(c(cc1/C=N/Nc2c3c([nH]cn3)ncn2)OC([C@@H](C(F)(F)F)(F)F)OC([C@@H](C(F)(F)F)(F)F)                                         |
| 187 | CC[C@H](C(=O)Nc1cccc(c1)C(=O)C)Sc2nnc(n2CC)CC(=O)Nc3cccc(c3)C(F)(F)F                                                        |
| 188 | COc1c(cnc(n1)OC)c2ccc3c(c2)[nH+]cc(c3Nc4cc(cc(c4)Oc5cc(cc(c5)F)F)C(=O)[O-])S(=O)(=O)NC6CC6                                  |
| 189 | CCOc1cc(ccc1OC(=O)c2cccc2)/C=N/NC(=O)c3ccc(cc3)NS(=O)(=O)c4ccc(cc4)C                                                        |
| 190 | CCCOc1ccc(cc1)C(=O)Oc2ccc(cc2)/C=N/NC(=O)CNC(=O)c3ccc(c(c3)Cl)Cl                                                            |
| 191 | CCN(CC)c1ccc(c(c1)O)/C=N/NC(=O)CSc2nnc(n2c3cccc(cc3)Cl)c4ccc(cc4)OC                                                         |
| 192 | CCCOc1ccc(cc1)C(=O)Oc2ccc(cc2)/C=N/NC(=O)CNC(=O)c3cccc3Cl)Br                                                                |
| 193 | CCCCCCCCOc1ccc(cc1)c2cc(n[nH]2)C(=O)N/N=C/c3cc(c(c3)OC)OC(=O)C                                                              |
| 194 | CCCCOc1ccc(cc1)C(=O)Oc2ccc(cc2)/C=N/NC(=O)C(=O)Nc3c(c4c(s3)CCCC4)C#N                                                        |
| 195 | CCOc1ccc(cc1)NC(=O)c2cccc2NC(=O)C(=O)N/N=C/c3ccc(cc3)OC(=O)c4ccc(cc4)Br                                                     |
| 196 | c1ccc(cc1)NC(=O)c2cccc2NC(=O)CCCC(=O)Nc3cccc3C(=O)Nc4cccc4                                                                  |
| 197 | COc1ccc(cc1)CC(=O)Nc2ccc(cc2)C(=O)N/N=C\c3ccc(c(c3)CSc4nc5cccc5o4)OC                                                        |
| 198 | CCC(C)(C)n1c(nnn1)[C@@H](c2cc3ccc(cc3[nH]c2=O)C)[NH+](CCc4cccc4)Cc5cccs5                                                    |
| 199 | CCC(C)(C)n1c(nnn1)[C@H](c2cc3cc(ccc3[nH]c2=O)C)[NH+](CCc4cccc4)Cc5cccs5                                                     |
| 200 | CCc1ccc2c(c1)cc(c(=O)[nH]2)[C@@H](c3nnnn3C(C)(C)C)[NH+](CCc4cccc4)Cc5cccs5                                                  |
| 201 | CCc1ccc2c(c1)cc(c(=O)[nH]2)[C@H](c3nnnn3C(C)(C)C)[NH+](CCc4cccc4)Cc5cccs5                                                   |
| 202 | COc1ccc(cc1)OCC(=O)O[C@H]2[C@@H]3C[NH+]4CCc5c6ccc(cc6[nH]c5[C@H]4C[C@@H]3[C@@H])([C@H]2OC)C(=O)OC)OC                        |
| 203 | CCCN(CCCC)S(=O)(=O)c1ccc(cc1)C(=O)Nc2c(c3c(s2)C([NH2+]C(C3)(C)C)(C)C)C#N                                                    |
| 204 | CCOc1ccc(cc1)N([C@H](c2cc[nH+]cc2)C(=O)NC(C)(C)C)C(=O)Cn3nc(nn3)c4ccc(cc4)C                                                 |
| 205 | CCc1ccc2c(c1)cc(c(=O)[nH]2)C[NH+](Cc3cccc3)[C@@H](CC)c4nnnn4Cc5ccc(cc5)OC                                                   |
| 206 | CCOc1ccc(cc1Cl)/C=C/2[C@H](N(C(=O)C2=O)CCN3cc[nH+]c3)c4cc(ccc4OC)OC)/O                                                      |
| 207 | CC[C@H](c1nnnn1CCc2cccc2)[NH+](CCc3cccc(c3)C)Cc4cc5cc(cc(c5[nH]c4=O)C)C                                                     |
| 208 | CC[C@@H](c1nnnn1C2CCCC2)[NH+](CCc3ccc(c(c3)OC)OC)Cc4cc5cc(ccc5[nH]c4=O)C                                                    |

|     |                                                                                                                             |
|-----|-----------------------------------------------------------------------------------------------------------------------------|
| 209 | <chem>Cc1cc(ccc1OC)CNc2cc3c(c(n(c3[nH+]c2)CCc4ccccn4)C(=O)OC)NC(=O)C5CCC5</chem>                                            |
| 210 | <chem>CC[NH+](CC)CCCN1[C@@H](C(=C(c2ccc(cc2)OCC)O)C(=O)C1=O)c3cccc(c3)Oc4cccc4</chem>                                       |
| 211 | <chem>CC[NH+](CC)CCCN1[C@@H](C(=C(c2ccc(cc2)OCC)O)C(=O)C1=O)c3cccc(c3)Oc4cccc4</chem>                                       |
| 212 | <chem>CCOc1ccc(cc1Cl)/C(=C/2[C@@H](N(C(=O)C2=O)CCC[NH+](C)C)c3cc(c(c(c3)OC)OC)OC)/O</chem>                                  |
| 213 | <chem>CCCCOC1ccc(cc1)[C@H]2/C(=C(\c3ccc4c(c3)OCCO4)/O)/C(=O)C(=O)N2CCc5cc[nH+]c5</chem>                                     |
| 214 | <chem>COc1ccc(c(c1OC)OC)/C=N\NC(=O)CSc2[nH+]c3cccc3n2Cc4ccc(cc4)Cl</chem>                                                   |
| 215 | <chem>c1ccc(cc1)C(c2cccc2)[NH+]3CCN(CC3)CCc4cc(c5c4cc(cc5)C(=O)[O-])Cn6cc[nH+]c6</chem>                                     |
| 216 | <chem>C[C@@H]1Cc2cc(ccc2O1)C(=O)C3=C(C(=O)N([C@H]3c4ccc(c(c4)OC)OCC(C)C)CCC[NH+](C)C)O</chem>                               |
| 217 | <chem>CC[NH+](CC)CCN1[C@@H](C(=C(C1=O)O)C(=O)c2c(nc(s2)C)C)c3cc(c(c(c3)C(C)(C)C)O)C(C)(C)C</chem>                           |
| 218 | <chem>CCCC[NH+](C)CCN1[C@@H]([C@@]23C=C[C@@H](O2)[C@@H]([C@@H]3C1=O)C(=O)Nc4cccc(c4)OC)C(=O)NC5CCCC5</chem>                 |
| 219 | <chem>Cc1ccc(cc1)CN2[C@@H]([C@@H](OC2=O)c3ccc(cc3)NC(=O)c4cccc4OC)C(=O)NCC[NH+](C)C</chem>                                  |
| 220 | <chem>CC[C@@H](C)[NH+](Cc1c(nn(c1Oc2cccc2OC)c3cccc3)C)C[C@@H](COc4cccc4)O</chem>                                            |
| 221 | <chem>CC(C)N(c1cccc1)C(=O)Cn2c3cccc3[nH+]c2CCNC(=O)c4cc(c(c(c4)OC)OC)OC</chem>                                              |
| 222 | <chem>CC[C@@H](c1nnnn1Cc2ccc(cc2)OC)[NH+](Cc3ccc(cc3)F)Cc4cc5ccc(cc5[nH]c4=O)OC</chem>                                      |
| 223 | <chem>CC[C@@H](c1nnnn1Cc2ccc(cc2)OC)[NH+](Cc3ccc4c(c3)OCO4)Cc5cc6c(cc(cc6[nH]c5=O)C)C</chem>                                |
| 224 | <chem>Cc1ccc(c2c1cc(c(=O)[nH]2)C[NH+](CCc3ccc(c(c3)OC)OC)Cc4nnnn4Cc5ccc(cc5)F)C</chem>                                      |
| 225 | <chem>CC[C@H](c1nnnn1Cc2ccc(cc2)F)[NH+](Cc3ccc(cc3)OC)Cc4cc5cc(ccc5[nH]c4=O)OC</chem>                                       |
| 226 | <chem>Cc1cc(c2cc(c(=O)[nH]c2c1)[C@@H](c3nnnn3CCc4cccc4)N(Cc5ccc(cc5)OC)Cc6ccc[nH+]c6)C</chem>                               |
| 227 | <chem>COc1cccc1N2CC[NH+](CC2)Cc3ccc(cc3)C(=O)N/N=C/c4ccc(cc4)OCC(=O)Nc5cccc(c5)Cl</chem>                                    |
| 228 | <chem>CC(C)(C)c1cc(c(c1)/C=[NH+]/CC/[NH+]=C/c2cc(cc(c2[O-])CN3CCOCC3)C(C)(C)C)O)CN4CCOCC4</chem>                            |
| 229 | <chem>C[C@@H]1(C[NH+])([C@H](C/C1=N/CCc2ccc(c(c2)OC)OC)c3cccc3)CCc4ccc(c(c4)OC)OC)O</chem>                                  |
| 230 | <chem>C[C@@H]1Cc2cc(ccc2O1)C(=O)C3=C(C(=O)N([C@@H]3c4cccc(c4)OCC(C)C)CCc5cc[nH+]c5)O</chem>                                 |
| 231 | <chem>Cc1cc2c(cc1OC)[nH]c3c2CC[NH+]4[C@@H]3[C@H]5[C@@H](C4)C[C@H]([C@@H]([C@H]5C(=O)OC)OC)OC(=O)c6cc(c(c(c6)OC)OC)OC</chem> |
| 232 | <chem>CC[C@@H]([C@@H]1C(=NN(C1=O)c2nc3cccc3s2)CSc4ccc(cc4)Cl)[NH2+]CCc5c[nH]cn5</chem>                                      |
| 233 | <chem>COc1ccc(cc1OC)CC[NH+](Cc2ccc(cc2)Cl)Cc3nc(cs3)C(=O)NCc4cccc4</chem>                                                   |
| 234 | <chem>CCCCCNC(=O)c1csc(n1)C[NH+](Cc2ccc3c(c2)OCO3)Cc4ccc(cc4OC)OC</chem>                                                    |
| 235 | <chem>CCCC(=O)OCc1cnc(c2c1cc(/c(=[NH+]/c3ccc(cc3)C)/o2)C(=O)Nc4ccc(cc4OC)OC)C</chem>                                        |
| 236 | <chem>COc1ccc(cc1)N/C(=[NH+]/CCc2ccc(c(c2)OC)OC)/S[C@@H]3CC(=O)N(C3=O)c4cccc(c4)Cl</chem>                                   |
| 237 | <chem>Cc1ccc(cc1)C(=O)N/C(=C\c2cn(nc2c3ccc(cc3)Cl)c4cccc4)/C(=O)NCCc5cc[nH+]c5</chem>                                       |
| 238 | <chem>CC(=O)Oc1cccc(c1)/C=[NH+]/c2cc(ccc2O)S(=O)(=O)c3ccc(c(c3)/N=C/c4cccc(c4)OC(=O)C)O</chem>                              |
| 239 | <chem>c1ccc(cc1)C(=O)Oc2ccc(cc2)c3csc([n+3CCc4ccc(cc4)S(=O)(=O)N)Nc5cccc(c5)C(F)(F)F</chem>                                 |
| 240 | <chem>Cc1cccc(c1)COc2ccc(cc2)C(=O)C3=C(C(=O)N([C@@H]3c4ccc(cc4)N(C)C)CCc5cc[nH+]c5)O</chem>                                 |
| 241 | <chem>COc1cc2cc[nH+]c(c2cc1OC)Cc3cc(c(cc3NC(=O)COc4ccc5cccc5c4)OC)OC</chem>                                                 |
| 242 | <chem>CCOC(=O)C1=C(NC(=O)N[C@@H]1c2cccc(c2)F)CN(Cc3ccc[nH+]c3)C(=O)Cc4ccc(cc4)Cl</chem>                                     |
| 243 | <chem>C[NH+](C)CCNC(=O)c1cccc(c1)Nc2c(cnn(c2=O)c3ccc(cc3)OC)Oc4ccc5c(c4)CCC5</chem>                                         |
| 244 | <chem>CCc1cc(nc([nH+]1)SCc2ccc(o2)C(=O)NCc3ccc3)N4CCN(CC4)c5ccc(cc5)OC</chem>                                               |
| 245 | <chem>COc1cc2cc[nH+]c(c2cc1OC)Cc3cc(c(cc3NC(=O)CSc4nc5cccc5s4)OC)OC</chem>                                                  |

|     |                                                                                                                                |
|-----|--------------------------------------------------------------------------------------------------------------------------------|
| 246 | <chem>COc1cc2cc[nH+]c(c2cc1OC)Cc3cc(c(cc3NC(=O)CSc4nnc(o4)c5cccs5)OC)OC</chem>                                                 |
| 247 | <chem>CCN(CC)S(=O)(=O)c1cccc(c1)c2nnc(o2)SCC(=O)Nc3cc(c(cc3OC)Cl)C</chem>                                                      |
| 248 | <chem>CCc1ccc(cc1)N([C@H](c2cc(c(c2)OC)OC)OC)C(=O)NC3CCCCC3)C(=O)c4cncn4</chem>                                                |
| 249 | <chem>CCOc1ccc(cc1)NC(=O)CN2C(=O)/C(=C\c3cc(c(c3)Cl)OCc4cccc4C#N)OC)/SC2=O</chem>                                              |
| 250 | <chem>[H]/N=C\1/C(=C/c2cc(c(c2)Cl)OCCOc3ccc(cc3)C)OC)/C(=O)N=C4N1N=C(S4)COc5ccccc5</chem>                                      |
| 251 | <chem>CC(C)[C@H](C(=O)Nc1ccc(cc1)N(C)C)N(Cc2nc(cs2)c3ccccc3)C(=O)CN4c5ccccc5C(=O)C4=O</chem>                                   |
| 252 | <chem>CN(C)c1ccc(cc1)NC(=O)[C@H](c2cccs2)N(Cc3ccc(cc3)OC)C(=O)Cn4c5ccccc5nn4</chem>                                            |
| 253 | <chem>Cc1cc(nc(n1)SCC(=O)N(Cc2ccccc2Cl)[C@H](c3ccc(cc3)OC)C(=O)Nc4ccc(cc4)OC)C</chem>                                          |
| 254 | <chem>CCOc1ccc(cc1OCC)CCNC(=O)Cn2cnc3c(c2=O)c(c(s3)C)c4ccc(cc4)Cl</chem>                                                       |
| 255 | <chem>CCc1cccc1NC(=O)CSC2=NC(=C([C@H](C2C#N)c3ccccc3Cl)C(=O)OCCOC)C</chem>                                                     |
| 256 | <chem>CCN(CC)c1ccc(cc1)NC(=O)CSc2nnc(n2Cc3ccco3)COc4ccc(cc4)Cl</chem>                                                          |
| 257 | <chem>Cc1ccc(o1)c2nnn(n2)CC(=O)N(c3ccc(cc3)Cl)[C@H](c4cccs4)C(=O)NCCC(C)C</chem>                                               |
| 258 | <chem>CCC(C)(C)NC(=O)[C@H](c1ccc(cc1)OC)N(c2ccc(cc2)C(=O)C)C(=O)Cn3c4ccccc4nn3</chem>                                          |
| 259 | <chem>CCOCCOC(=O)C1=C(NC2=C([C@H]1c3cc(c(cc3OC)OC)OC)C(=O)C[C@H](C2)c4cccs4)C</chem>                                           |
| 260 | <chem>CCCCN(CC)S(=O)(=O)c1ccc(cc1)C(=O)Nc2cc(nn2c3nc4ccc(cc4s3)OC)C</chem>                                                     |
| 261 | <chem>CCCCCNC(=O)c1csc(n1)CN(CCc2ccc(c(c2)OC)OC)Cc3ccc4c(c3)OCO4</chem>                                                        |
| 262 | <chem>CC[NH+](CC)CCN(c1nc2ccccc2s1)C(=O)c3ccccc3[N-]S(=O)(=O)c4ccc(cc4)F</chem>                                                |
| 263 | <chem>CCCOc1cccc(c1)[C@H]2c3c(n[nH]c3C(=O)N2CCc4ccc(c(c4)OC)OC)c5ccc(cc5)OC</chem>                                             |
| 264 | <chem>CCCCSc1nc2n(n1)[C@H](C(=C(N2)C)C(=O)OC(C)C)c3cc(c(c3)Br)OC)OC</chem>                                                     |
| 265 | <chem>CCCCOC(=O)C1=C(Nc2nc(nn2[C@H]1c3cc(c(c3)Br)OC)OCC)SCC)C</chem>                                                           |
| 266 | <chem>CCOc1ccc(cc1)[C@H](C(=O)NC2CCCC2)N(c3cccc4c3CCCC4)C(=O)Cn5nc(nn5)c6cccs6</chem>                                          |
| 267 | <chem>Cc1ccc(cc1)c2nnn(n2)CC(=O)N(Cc3ccccc3C)[C@H](c4ccncc4)C(=O)NC5CCCC5</chem>                                               |
| 268 | <chem>COc1cccc1c2cc(nc(n2)S(=O)(=O)CCCC(=O)Nc3ccc(c(c3)Cl)n4cccc4)C(F)(F)F</chem>                                              |
| 269 | <chem>CC[C@H](c1nnnn1CCc2ccccc2)N(Cc3ccc4c(c3)OCO4)Cc5cc6ccc(cc6[nH]c5=O)C</chem>                                              |
| 270 | <chem>CC[C@H](c1nnnn1Cc2ccc(cc2)OC)N(Cc3cccs3)Cc4cc5cc(c(cc5[nH]c4=O)C)C</chem>                                                |
| 271 | <chem>CC[C@H](c1nnnn1CCc2ccccc2)N(Cc3cccs3)Cc4cc5cc6c(cc5[nH]c4=O)OCO6</chem>                                                  |
| 272 | <chem>CCOc1ccc(cc1)n2c(nnc2SCC(=O)N/N=C/c3cc(ccc3OC)Br)c4ccccc4</chem>                                                         |
| 273 | <chem>CCOc1ccc(cc1OC)[C@H]2C(=C(Nc3n2nc(n3)SCc4ccccc4Cl)C)C(=O)OC(C)C</chem>                                                   |
| 274 | <chem>CN(C)c1ccc(cc1)c2nnc(n2CC=C)SCC(=O)Nc3c(c4c(s3)CCCC4)C(=O)OC</chem>                                                      |
| 275 | <chem>Cc1ccc(c(c1)OCc2nnc(n2C)SCC(=O)Nc3c(c4c(s3)CCCC4)C(=O)OC(C)C)C</chem>                                                    |
| 276 | <chem>COc1cccc1OCc2nnc(n2CC=C)SCC(=O)Nc3ccc(cc3)I</chem>                                                                       |
| 277 | <chem>CC1=C([C@H](C2=C(N1)C[C@H](CC2=O)c3ccc(cc3)OC)c4cc(c(c4)OC)OC)OC)C(=O)OCCOC</chem>                                       |
| 278 | <chem>[H]/N=C\1/C(=C/c2cc(c(c2)Cl)OCCOc3ccc(cc3)C)OCC)/C(=O)N=C4N1N=C(S4)CCC</chem>                                            |
| 279 | <chem>[H]/N=C\1/C(=C/c2cc(c(c2)Cl)OCCOc3ccc(cc3)C)OC)/C(=O)N=C4N1N=C(S4)CCCC</chem>                                            |
| 280 | <chem>C[C@H](CCC(=O)O)[C@H]1CC[C@H]2[C@@]1([C@H](C[C@H]3[C@H]2[C@@H](C[C@H]4[C@@]3(CC[C@H](C4)OC(=O)C)OC(=O)C)OC(=O)C)C</chem> |
| 281 | <chem>C[C@H](CCC(=O)O)[C@H]1C[C@H]2[C@@H]3CC=C4C[C@H](CC[C@@]4([C@H]3CC[C@@]2([C@H]1NC(=O)C)C)OC(=O)C)COC(=O)C</chem>          |
| 282 | <chem>CC[C@H](C)[C@H](C(=O)Oc1ccc2c(cc(=O)oc2c1)c3ccc(cc3)OC)NS(=O)(=O)c4ccc(cc4)C</chem>                                      |

|     |                                                                                                                       |
|-----|-----------------------------------------------------------------------------------------------------------------------|
| 283 | <chem>Cc1ccc(cc1)S(=O)(=O)Nc2ccc3c(c2)c(c(n3S(=O)(=O)c4ccc(cc4)C)C)C(=O)OCCOC</chem>                                  |
| 284 | <chem>CC1=C([C@@H](C2=C(N1)C[C@H](CC2=O)c3cccs3)c4ccc(c(c4)OC)OC)C(=O)OCCOc5ccccc5</chem>                             |
| 285 | <chem>Cc1ccc(cc1)OCc2nnc(n2c3ccc(cc3)OC)SCC(=O)Nc4cc(c(cc4OC)Cl)C</chem>                                              |
| 286 | <chem>CC[C@H](C)c1ccc(cc1)OCCOc2c(cc(cc2Cl)/C=C\3/C(=O)NC(=O)N(C3=O)c4ccc(cc4)C)OC</chem>                             |
| 287 | <chem>CCOc1cc(ccc1OCCOc2ccccc2OC)/C=C\3/C(=O)NC(=O)N(C3=O)c4ccc(cc4)Br</chem>                                         |
| 288 | <chem>[H]/N=C\1/C(=C/c2cn(c3c2cccc3)CCOc4cccc4CC=C)/C(=O)N=C5N1N=C(S5)COc6ccccc6C</chem>                              |
| 289 | <chem>[H]/N=C\1/C(=C/c2cn(c3c2cccc3)CCCOc4cccc(c4)OC)/C(=O)N=C5N1N=C(S5)COc6ccccc6C</chem>                            |
| 290 | <chem>CC(C)c1ccc(c(c1)S(=O)(=O)NCCN2CCN(CC2)S(=O)(=O)c3cc(ccc3OC)C(C)C)OC</chem>                                      |
| 291 | <chem>Cc1ccccc1CSc2nnc(n2c3ccc(cc3)[N+](=O)[O-])[C@H](C)NC(=O)COc4ccc(cc4)Cl</chem>                                   |
| 292 | <chem>Cc1cccc(c1)C(=O)N(Cc2ccco2)Cc3cc(ccc3N(C)C)NS(=O)(=O)c4ccc(cc4)OC</chem>                                        |
| 293 | <chem>CCCOc1ccc(cc1C)C(=O)C2=C(C(=O)N([C@H]2c3cccc(c3)Oc4cccc4)Cc5cccn5)O</chem>                                      |
| 294 | <chem>CCCOc1ccccc1CN(Cc2ccco2)c3cnc(nc3C(=O)Nc4ccc(cc4)C)S(=O)(=O)C</chem>                                            |
| 295 | <chem>CC(=C)Cn1c(nnc1SCC(=O)N/N=C/c2ccc(c(c2)OC)OC)c3ccc(cc3)Br</chem>                                                |
| 296 | <chem>COc1cc(cc(c1OC)OC)/C=N/NC(=O)CSc2nnc(n2c3ccccc3)c4ccc(cc4)Br</chem>                                             |
| 297 | <chem>COc1ccc(cc1)Nc2nc(nc(n2)N/N=C/c3cc(c(c(c3)l)OCC#C)OC)NCc4ccco4</chem>                                           |
| 298 | <chem>Cc1ccc(cc1[N+](=O)[O-])S(=O)(=O)N(CC(=O)NCCSc2ccc(cc2Cl)Cl)c3ccc(cc3)OC</chem>                                  |
| 299 | <chem>Cc1ccc(cc1C)OCc2nnc(n2c3ccccc3)SCC(=O)Nc4ccc5c(c4)sc(n5)SCC(=O)Nc6ccccc6</chem>                                 |
| 300 | <chem>CC(=O)O[C@H]([C@@H]([C@@H]([C@H](C(=O)Nc1cccc2c1cccc2)OC(=O)C)OC(=O)C)[C@H](C(=O)Nc3cccc4c3cccc4)OC(=O)C</chem> |
| 301 | <chem>Cc1c(c(sc1C(=O)OC(C)C)NC(=O)CCCC(=O)Nc2c(c(c(s2)C(=O)OC(C)C)C(=O)OC(C)C(=O)OC(C)C</chem>                        |
| 302 | <chem>CCCOc1c(cccc1OC)[C@H]2C(=C(N=c3n2c(=O)/c=C\c4ccc(c(c4)Br)OCC(=O)N/s3)C)C(=O)OCC</chem>                          |
| 303 | <chem>COc1cc(nc(n1)OC)NS(=O)(=O)c2ccc(cc2)NC(=S)NC(=C(C(F)(F)F)C(F)(F)F)C(C(F)(F)F)(F)F</chem>                        |
| 304 | <chem>Cc1cc(cc(c1)OCCOc2c(cc(cc2Cl)/C=N/Nc3cc(nc(n3)N4CCCC4)N5CCCC5)OC)C</chem>                                       |
| 305 | <chem>CCCCCOc1ccc(cc1)OCCOc2c(cc(cc2l)/C=N/NC(=O)c3ccncc3)OCC</chem>                                                  |
| 306 | <chem>CCCCCOc1ccc(cc1)OCCOc2c(cc(cc2l)/C=N/NC(=O)c3ccncc3)OC</chem>                                                   |
| 307 | <chem>CCOC(=O)NCc1ccc(cc1)S(=O)(=O)Nc2cc(c(cc2Cc3c4cc(c(cc4ccn3)OC)OC)OC)OC</chem>                                    |
| 308 | <chem>c1ccc(cc1)COP(=O)(OCc2ccccc2)OC[C@@H]3[C@H]([C@H]([C@H]([C@H](O3)COP(=O)(OCc4ccccc4)OCc5ccccc5)O)O</chem>       |
| 309 | <chem>CC(=O)N[C@@H]1[C@H]([C@H]([C@H]([C@H](O[C@H]1Sc2nc3ccccc3n2CCCOc4ccc5ccccc5c4)COC(=O)C)OC(=O)C)OC(=O)C</chem>   |
| 310 | <chem>CC[NH+](CC)c1ccc(cc1)NC(=O)CSc2c(c(sn2)SCC(=O)Nc3ccc(cc3)N(CC)CC)C#N</chem>                                     |
| 311 | <chem>CCCOc1ccc(cc1)NC(=O)C[C@H]2C(=O)N(C(=S)N2CCc3c(c(c(n3)C)[N+](=O)[O-])C)c4ccc(cc4)Cl</chem>                      |
| 312 | <chem>[H]/N=C\1/C(=C/c2ccc(c(c2)OCC)OCCOc3ccc(cc3)Br)/C(=O)N=C4N1N=C(S4)CCCCC</chem>                                  |
| 313 | <chem>[H]/N=C\1/C(=C/c2cc(c(c2)Br)OCCOc3ccc(cc3)C(C)(C)OC)/C(=O)N=C4N1N=C(S4)CCCCC</chem>                             |
| 314 | <chem>CCOc1cc(ccc1OCCSc2cccc3c2cccc3)/C=N/Nc4cc(nc(n4)N5CCOCC5)N6CCOCC6</chem>                                        |
| 315 | <chem>COc1cccc(c1OC)[C@H]2CC(=NN2C(=O)CSc3nnc(n3c4cccc(c4)C(F)(F)F)CNC(=O)c5ccco5)c6cccs6</chem>                      |
| 316 | <chem>CCOc1ccc(cc1)n2c(nnc2SCC(=O)N3[C@H](CC(=N3)c4cccc4)c5ccccc5OC)OC)CNC(=O)c6ccco6</chem>                          |
| 317 | <chem>CCN(Cc1ccccc1)S(=O)(=O)c2ccc(cc2)C(=O)Nc3nnc(o3)c4cc(c(c4)OCC)OCC)OCC</chem>                                    |
| 318 | <chem>CCC/C(=N)OC(C(F)(F)F)(C(F)(F)F)NC(=O)Nc1cccc(c1)[C@](C(=O)OCC)(C(F)(F)F)O/Cl</chem>                             |
| 319 | <chem>CCCOc1ccc(cc1OCC)[C@H]2C(=C(C(=O)N2c3nnc(s3)SCc4ccccc4F)O)C(=O)c5ccc6c(c5)OCCO6</chem>                          |
| 319 | <chem>CC[NH+](CC)CCCN1[C@H](C(=C(C1=O)[O-])C(=O)c2ccc3c(c2)OCCO3)c4ccc(c(c4)OCC)OCC(C)C</chem>                        |

|     |                                                                                                            |
|-----|------------------------------------------------------------------------------------------------------------|
| 320 | <chem>CCOc1cc(ccc1OCC=C)[C@H]2C(=C(C(=O)N2c3nnc(s3)SCc4cccc4F)O)C(=O)c5ccc6c(c5)C[C@@H](O6)C</chem>        |
| 321 | <chem>CCOc1cc(ccc1OCCC(C)C)[C@@H]2C(=C(C(=O)N2c3nnc(s3)SCc4cccc4F)O)C(=O)c5ccc6c(c5)C[C@H](O6)C</chem>     |
| 322 | <chem>CCOc1cc(cc(c1OCC)OCC)C(=O)NCc2nnc(n2c3cc(ccc3OC)OC)SCC(=O)N4CCc5c4cccc5</chem>                       |
| 323 | <chem>c1ccc(cc1)c2nc(c(o2)COC(=O)[C@@H](c3ccccc3)NC(=O)c4cccc4)COC(=O)[C@@H](c5ccccc5)NC(=O)c6cccc6</chem> |
| 324 | <chem>CCOc1ccc(cc1OCC)Cn2c3c(nc2SCC(=O)Nc4ccc(cc4)OC(F)(F)F)n(c(=O)n(c3=O)C)C</chem>                       |
| 325 | <chem>CC(C)(C)c1c2c(n(n1)c3ccc(cc3)OC)N(C(=O)CS[C@H]2c4ccc(c(c4)OC)OC)CC(=O)NCCCOC</chem>                  |
| 326 | <chem>Cc1ccc(c(c1)C)n2c(cc(n2)C(C)(C)C)NC(=O)CN(CCCOC)C(=O)Nc3c(cccc3C(C)C)C(C)C</chem>                    |
| 327 | <chem>COc1ccc(cc1OC)CCN(Cc2cccs2)C(=O)CN(C[C@@H]3CCCO3)C(=O)Nc4c(cccc4Cl)Cl</chem>                         |
| 328 | <chem>CCOCCCN(CC(=O)N(CCC1ccc(c(c1)OC)OC)Cc2ccc(s2)C)C(=O)Nc3ccc(c(c3)C)C</chem>                           |
| 329 | <chem>CCOc1ccc(cc1)NC(=O)N(CCOCC)CC(=O)N(CCC2ccc(c(c2)OC)OC)Cc3ccc(s3)C</chem>                             |
| 330 | <chem>CCOc1ccc(cc1F)c2c(cn(n2)c3ccccc3)C4C(=C(NC(=C4C(=O)OCCOC)C)C)C(=O)OCCOC</chem>                       |
| 331 | <chem>CCN(CC)c1ccc(cc1)/C=N/NC(=O)CS2nnc(n2CC=C)CNc3ccc(cc3)I</chem>                                       |
| 332 | <chem>CC1=C(C(C(=C(N1)C)C(=O)OCC(C)C)c2cn(nc2c3ccc(c(c3)F)OC)c4cccc4)C(=O)OCC(C)C</chem>                   |
| 333 | <chem>CCCCOc1ccc(cc1)C(=O)C2=C(C(=O)N([C@H]2c3ccc(c(c3)OC)OCC=C)c4nnc(s4)SCc5ccccc5Cl)O</chem>             |
| 334 | <chem>COc1ccc(cc1OC)C(=O)C2=C(C(=O)N([C@H]2c3ccc(cc3)OCC=C)c4nnc(s4)SCc5ccccc6c5cccc6)O</chem>             |
| 335 | <chem>CCCOc1ccc(cc1)C(=O)Oc2ccc(cc2/C=N/NC(=O)CNC(=O)c3ccc(cc3)OC)Br</chem>                                |
| 336 | <chem>Cc1ccc(cc1)n2c(nnc2SCC(=O)Nc3ccccc3)Cc4nnc(n4c5ccc(cc5)C)SCC(=O)Nc6ccccc6</chem>                     |
| 337 | <chem>Cc1ccc(c(c1)C)n2c(nnc2SCC(=O)Nc3ccccc3)Cc4nnc(n4c5ccc(cc5)C)SCC(=O)Nc6ccccc6</chem>                  |
| 338 | <chem>CCCCCOc1ccc(cc1OC)[C@@H]2C(=C(C(=O)N2c3nc(c(s3)C(=O)OC)C)O)C(=O)c4ccc(c(c4)F)C</chem>                |
| 339 | <chem>CCCOc1ccc(cc1)C(=O)Oc2ccc(cc2OCC)/C=N/NC(=O)COc3ccc4cccc4c3Br</chem>                                 |
| 340 | <chem>CC1=C(C(C(=C(N1)C)C(=O)OCCOC)c2cn(nc2c3ccc4cccc4c3)c5ccccc5)C(=O)OCCOC</chem>                        |
| 341 | <chem>c1ccc2c(c1)/C(=C/3/C(=O)N(C(=S)S3)CCCCCCCCC(=O)O)/C(=O)N2CC(=O)Nc4cccc(c4)C(F)(F)F</chem>            |
| 342 | <chem>CCCOc1ccc(cc1)C(=O)Oc2ccc(cc2OC)/C=N/NC(=O)CNC(=O)c3cc(c(c3)OC)OC)OC</chem>                          |
| 343 | <chem>CCOc1ccc(cc1)NC(=O)c2ccccc2NC(=O)C(=O)N/N=C/c3cc(ccc3OC(=O)/C=C/c4cccc4)Br</chem>                    |
| 344 | <chem>CC1=C(C(C(=C(N1)C)C(=O)OCC=C)c2cn(nc2c3ccc(cc3)S(=O)(=O)N(C)C)c4cccc4)C(=O)OCC=C</chem>              |
| 345 | <chem>C=CC(=O)OC[C@@H](COc1ccc(cc1)C2(c3ccccc3-c4c2cccc4)c5ccc(cc5)OC[C@@H](COCC(=O)C=C)O)O</chem>         |
| 346 | <chem>COc1ccc(cc1)NC(=O)CSC2=Nc3ccccc3C4=N[C@@H](C(=O)N42)CCC(=O)Nc5cccs5</chem>                           |
| 347 | <chem>CCOc1cc(ccc1OC(=O)c2ccc(cc2)Cl)/C=N/NC(=O)CNC(=O)c3ccccc3Cl</chem>                                   |
| 348 | <chem>CCOc1ccc(cc1)C(=O)NCC(=O)N/N=C/c2ccc(cc2)OC(=O)c3ccc(cc3Cl)Cl</chem>                                 |
| 349 | <chem>Cc1ccc(cc1)C(=O)N/C(=C/c2cn(nc2c3ccc(cc3)Cl)c4cccc4)/C(=O)NCCN5ccnc5</chem>                          |
| 350 | <chem>CCOC(=O)CC[C@H](C(=O)OCC)NC(=O)c1ccc(cc1)Nc2cnc3cc(ccc3n2)C(F)(F)F</chem>                            |
| 351 | <chem>CCN(CC)S(=O)(=O)c1cc(ccc1C)c2c3ccccc3c(nn2)Nc4ccc(cc4)OCC(=O)NC</chem>                               |
| 352 | <chem>CCCN(CCC)S(=O)(=O)c1ccc(cc1)C(=O)NNC(=O)c2c(onc2c3ccccc3Cl)C</chem>                                  |
| 353 | <chem>CCOc1ccc(cc1)S(=O)(=O)Nc2ccc(c3c2ccccc3)NS(=O)(=O)c4ccc(cc4)OCC</chem>                               |
| 354 | <chem>CCOc1ccccc1N(CC(=O)Nc2ccc(cc2)NC(=O)C)S(=O)(=O)c3ccc(cc3)SC</chem>                                   |
| 355 | <chem>Cc1cccc(c1)n2c(nnc2SCC(=O)Nc3ccc(cc3)OC)CNC(=O)c4cccc(c4)OC</chem>                                   |
| 356 | <chem>CCOc1ccc(cc1)NC(=O)CS2nnc(n2c3ccccc3)C)CNC(=O)c4ccc(c(c4)C)C</chem>                                  |
| 356 | <chem>CCc1nnc(n1NC(=S)NC(=O)c2ccc(c(c2)[N+](=O)[O-])N3CCCC3)SCc4cccc4</chem>                               |

|     |                                                                                                   |
|-----|---------------------------------------------------------------------------------------------------|
| 357 | CCOc1ccc(cc1)n2c(nnc2SCC(=O)Nc3ccc(ccc3C)C)CNC(=O)c4cccc(c4)C                                     |
| 358 | CCOc1cc(cc(c1OCC)OCC)C(=O)Nc2nnc(s2)SCC(=O)Nc3cccc3F                                              |
| 359 | Cc1cccc(c1)NC(=O)CSc2nnc(n2c3cccc(c3C)C)CNC(=O)Cc4ccc(cc4)OC                                      |
| 360 | CCc1ccc2c(c1)cc(c(=O)[nH]2)CN(CCc3ccc(c(c3)OC)OC)C(=O)Nc4ccc(cc4)OC                               |
| 361 | CCN(CC)S(=O)(=O)c1cc(ccc1C)NC(=O)[C@@H](C)Sc2nnc(s2)Nc3cccc3F                                     |
| 362 | CCOC(=O)Nc1ccc2c(cc(=O)oc2c1)COC(=O)[C@H](CCSC)NC(=O)c3cccc(c3)C                                  |
| 363 | CCCCOC(=O)C[C@@H]1C(=O)NCCN1C(=S)NC(=O)c2cc(ccc2OCCC)Br                                           |
| 364 | CCCCOC(=O)C[C@H]1C(=O)NCCN1C(=S)NC(=O)c2cc(ccc2OCC)Br                                             |
| 365 | Cc1cc(ccc1/C(=N/NC(=O)c2cc(ccc2O)Cl)/N=N/c3cccc3)N(CCC#N)CCC#N                                    |
| 366 | CCOc1ccc(cc1)NC(=O)C[C@H]2C(=O)N(C(=S)N2CCNC(=O)C)c3ccc(c(c3)Cl)OC                                |
| 367 | CC(C)(C)c1nnc(n1CC=C)SCC(=O)Nc2ccc(cc2)S(=O)(=O)Nc3cccc(c3)Cl                                     |
| 368 | Cc1cccc1C(=O)Nc2ccc(c(c2)C(=O)NCCCOC)N3CCN(CC3)c4cccc4OC                                          |
| 369 | CCCCCN1[C@@H]([C@@]23C=C[C@@H](O2)[C@@H]([C@@H]3C1=O)C(=O)Nc4cccc(c4)OC)C(=O)N[C@@H]5CCCC[C@@H]5C |
| 370 | C/C(=N/NC(=O)CSc1nnc(n1CC=C)C)Nc2ccc(cc2)Cl/c3ccc(cc3OC)OC                                        |
| 371 | CCCCOC1c(cc(cc1Cl)C(=O)Nc2ccc(cc2)S(=O)(=O)Nc3ccc(n3)C)Cl                                         |
| 372 | c1cc(ncc1)N/N=C/c2ccc(cc2)O[C@H]3OCCO[C@H]3Oc4ccc(cc4)/C=N/Nc5ncccc5                              |
| 373 | CC[C@H](C(=O)Nc1ccc(cc1)S(=O)(=O)NCc2ccc(o2)Sc3cc(nc(n3)C)c4cccc4                                 |
| 374 | CCCCOC1ccc(cc1OC)[C@H]2c3c(n[nH]c3C(=O)N2Cc4cccnc4)c5c(cc(cc5O)C)C                                |
| 375 | Cc1cc(nc(n1)C)NS(=O)(=O)c2ccc(cc2)NC(=O)COc3ccc(cc3)C(C)(C)CC(C)(C)C                              |
| 376 | CCOc1cccc1NC(=O)C2=C(Nc3nc(nn3[C@@H]2c4ccc(c(c4)OC)OC(C)C)SCC)C                                   |
| 377 | CC[C@H]([C@@H](C(=O)Nc1cccc(c1)C)SC2=Nc3cccc3C4=N[C@@H]([C@@H](C(=O)N42)CCC(=O)N)Cc5cccc5         |
| 378 | Cc1c(c(nc(c1C#N)SCc2nnc(n2N)CSc3c(c(c(c3)C)CC=C)C)C#N)C)CC=C                                      |
| 379 | Cc1cccc1C(=O)NCCc2nnc(n2C)SCC(=O)Nc3ccc(cc3)/N=N/c4cccc4                                          |
| 380 | C[C@@H](C(=O)N/N=C/c1cc(ccc1OC)OC)Sc2nnc(n2CC=C)C)Nc3ccc(cc3)Cl                                   |
| 381 | CCOc1ccc(cc1)NCc2nnc(n2c3cccc3)SCCC(=O)Nc4ccc(cc4)OCC                                             |
| 382 | c1cc(ncc1)N/N=C/c2ccc(cc2)O[C@H]3OCCO[C@H]3Oc4ccc(cc4)/C=N/Nc5ncccc5                              |
| 383 | Cc1cc(ccc1NC(=O)CSc2nnc(n2CC=C)[C@@H](C)NC(=O)c3ccc(cc3Cl)Cl)[N+](=O)[O-]                         |
| 384 | CC(=O)Nc1ccc(cc1)S(=O)(=O)N(CC(=O)N/N=C/c2cccc2C(F)(F)F)c3ccc(cc3)OC                              |
| 385 | CC(C)c1ccc(cc1)NC(=O)Cn2c3cccc3c(=O)n(c2=O)CCCC(=O)Nc4cccc4                                       |
| 386 | CCOc1cccc1CNC(=O)CN(C)c2nn3c(c(nc3s2)c4cccc(c4)F)NC(C)(C)C                                        |
| 387 | COc1c(nccn1)NS(=O)(=O)c2ccc(cc2)NC(=O)CCOC3ccc(cc3Cl)Cl                                           |
| 388 | CS(=O)(=O)CC(=O)NCCn1ccc2c1c(ncn2)Nc3ccc(c(c3)Cl)Oc4cccc(c4)C(F)(F)F                              |
| 389 | CCNc1nc(nc(n1)N(C(=O)COc2ccc(cc2Cl)Cl)S(=O)(=O)c3ccc(cc3)C)NCC                                    |
| 390 | CC(=O)Nc1ccc(cc1)S(=O)(=O)Oc2cccc2CN(Cc3cccc3)C(=O)Nc4cccc4OC                                     |
| 391 | c1cc(ccc1NC(=O)CSc2nnc(s2)SCC(=O)Nc3ccc(cc3)SC#N)SC#N                                             |
| 392 | Cc1ccc(c(c1)c2c3c([nH]n2)C(=O)N([C@@H]3c4cc(c(c4)OC)OC)OC)CCc5ccc(c(c5)OC)OC)O                    |
| 393 | CCOc1cc(ccc1OC(=O)c2ccc(cc2)OC)/C(=N/NC(=O)C(=O)Nc3c(c4c(s3)CCCC4)C#N                             |
| 393 | CCOCCOc1nc(n1)c2cccc(c2)NC(=O)Nc3ccc(cc3F)F)c4ccc(cc4)OC                                          |



|     |                                                                                   |
|-----|-----------------------------------------------------------------------------------|
| 394 | CC[C@H]1CN(CC[C@H]1CC(=O)N(CC)C(=O)NCCC[NH+](C)C)C(=O)Nc2cccc(c2)C(F)(F)F         |
| 395 | CCC[NH+]1CCc2c(sc(c2C(=O)NC)NC(=O)c3ccc(cc3)S(=O)(=O)N(CCC)CCC)C1                 |
| 396 | CCc1ccc2c(c1)cc(c(=O)[nH]2)C[NH+](Cc3ccccc3OC)Cc4nnnn4Cc5ccc(cc5)OC               |
| 397 | CCc1ccc2c(c1)cc(c(=O)[nH]2)C[NH+](Cc3ccccc3OC)Cc4nnnn4Cc5ccc(cc5)F                |
| 398 | CCc1ccc2c(c1)cc(c(=O)[nH]2)C[NH+](Cc3ccc(cc3)C)Cc4nnnn4Cc5ccc(cc5)OC              |
| 399 | CCc1ccc2c(c1)cc(c(=O)[nH]2)C[NH+](Cc3ccc4c(c3)OCO4)[C@H](CC)c5nnnn5C(C)(C)CC      |
| 400 | CCc1ccc2c(c1)cc(c(=O)[nH]2)C[NH+](Cc3ccccc3OC)[C@H](CC)c4nnnn4C5CCCC5             |
| 401 | CC[C@H](c1nnnn1Cc2ccccc2)[NH+](Cc3ccc(cc3)OC)Cc4cc5ccc(cc5[nH]c4=O)C              |
| 402 | CC[C@H](c1nnnn1C(C)(C)CC)[NH+](Cc2ccc(cc2)F)Cc3cc4cc(c(cc4[nH]c3=O)OC)OC          |
| 403 | Cc1ccccc1COc2ccc(cc2)/C=C/3\C[C@H](N(C(=O)C3=O)CCC[NH+](C)C)c4cccc(c4)OC)/O       |
| 404 | CC[NH+](CC)CCNC(=O)c1ccc(cc1)NC(=S)NC(=O)c2cc(ccc2OC)Br                           |
| 405 | CCCCCOc1ccc(cc1OC)[C@H]2C(=C(c3ccc4c(c3)OCCO4)O)C(=O)C(=O)N2CC[NH+](C)C           |
| 406 | CCOc1cc(ccc1OCC=C)[C@H]2/C=C(/c3ccc4c(c3)C[C@H](O4)C)/O)/C(=O)C(=O)N2CCC[NH+](C)C |
| 407 | COc1cc(cc(c1OC)[C@H](c2ccc3c(c2)OCO3)O)Br)C[NH2+][C@H](c4ccccc4)O                 |
| 408 | CCCOc1cccc(c1)C(=O)C2=C(C(=O)N([C@H]2c3ccccc(c3)Oc4ccccc4)Cc5cc[nH+]cc5)O         |
| 409 | CCOc1cccc(c1)C(=O)C2=C(C(=O)N([C@H]2c3ccccc(c3)Oc4ccccc4)CCn5cc[nH+]c5)O          |
| 410 | COc1cccc2c1oc(c2)C(=O)C3=C(C(=O)N([C@H]3c4ccc(cc4)OCC=C)CCn5cc[nH+]c5)O           |
| 411 | C[NH+](C)CCNC(=O)/C=C\c1ccc(o1)c2ccccc(c2)C(F)(F)F)/NC(=O)c3ccc(cc3)OC            |
| 412 | CCCOc1ccc(cc1)[C@H]2C(=C(C(=O)N2CCC[NH+](C)C)O)C(=O)c3c(nc(s3)c4ccccc4)C          |
| 413 | Cc1c(sc(n1)c2ccccc2)C(=O)C3=C(C(=O)N([C@H]3c4ccc(c(c4)OC)OC)CCC[NH+](C)C)O        |
| 414 | CC[NH+](CC)CCN1[C@H](C(=C(C1=O)O)C(=O)c2cc3ccccc(c3o2)OC)c4ccc(cc4OC)OC           |
| 415 | CC[NH+](CC)CCN1[C@H](C(=C(C1=O)O)C(=O)c2c(n3ccccc(c3n2)C)C)c4ccc(cc4)C(C)(C)C     |
| 416 | CCCCCOc1ccc(cc1)[C@H]2C(=C(C(=O)N2CCn3cc[nH+]c3)O)C(=O)c4c(nc(s4)C)C              |
| 417 | CCNC(=S)N(CC[NH+](C)C)Cc1cnc(n1Cc2ccccc2)S(=O)(=O)Cc3ccccc3C                      |
| 418 | Cc1c([nH+]c(nc1N(C)CCc2ccc(c(c2)OC)OC)SCc3ccc(cc3)C(=O)NCC(C)C)C                  |
| 419 | CC(C)[NH+](Cc1[nH]c(=O)c2c(csc2n1)c3ccccc3OC)C[C@H](COc4ccc(cc4)Cl)O              |
| 420 | CCc1c(c(n1)c2ccccc2)Oc3ccccc3C[NH+](C[C@H]4CCCO4)C[C@H](COC(C)(C)C)O              |
| 421 | CCc1c(c(n1)c2ccc(cc2)F)Oc3ccccc3C[NH+](Cc4ccco4)C[C@H](COC(C)(C)C)O               |
| 422 | CC(C)(C)OC[C@H](C[NH+](Cc1c(nn(c1O)c2ccccc(c2)F)C)c3ccccc3)C[C@H]4CCCO4)O         |
| 423 | CCOc1ccc(cc1)c2nc(c(o2)NCCC[NH+](C)C)S(=O)(=O)c3ccc(cc3)Br                        |
| 424 | Cc1ccc(c(c1)C)OCCCN2c3ccccc3[nH+]c2[C@H](C)NC(=O)Cc4ccc(c(c4)OC)OC                |
| 425 | C[C@H](c1[nH+]c2ccccc2n1CCCCOc3ccccc3OC)NC(=O)Cc4ccc(c(c4)OC)OC                   |
| 426 | COc1cc(cc(c1OC)OC)C(=O)NCCCc2[nH+]c3ccccc3n2Cc4ccc5ccccc5c4                       |
| 427 | CC(C)(C)c1ccc(cc1)OCCCN2c3ccccc3[nH+]c2CNC(=O)c4ccc(c(c4)OC)OC                    |
| 428 | CCCOc1ccc(cc1)[C@H](CNC(=O)c2ccc(o2)S(=O)(=O)c3ccc(cc3)Cl)[NH+](CC)CC             |
| 429 | CCCCOc1ccc(cc1)[C@H]2c3c(n[nH]c3C(=O)N2CC[NH+]4CCOCC4)c5ccc(cc5)Cl                |
| 430 | CCCCOc1ccc(cc1OCC)[C@H]2c3c(n[nH]c3C(=O)N2Cc4cc[nH+]cc4)c5ccc(cc5)OC              |
| 430 | Cc1ccc2cc(c(=O)[nH]c2c1C)C[NH+](CCc3ccc(c(c3)OC)OC)Cc4nnnn4Cc5ccccc5              |

|     |                                                                                      |
|-----|--------------------------------------------------------------------------------------|
| 431 | CC[NH+](CC)CCC[C@ @H](C)NC(=O)c1cc(nc2c1c(nn2[C@ @H]3CCS(=O)(=O)C3)C)c4ccc(cc4)C     |
| 432 | CC[NH+](CC)CCC[C@ @H](C)NC(=O)c1cc(nc2c1c(nn2[C@H]3CCS(=O)(=O)C3)C)c4ccc(cc4)C       |
| 433 | COc1cc2cc[nH+]c(c2cc1OC)Cc3cc(c(cc3NS(=O)(=O)c4ccc(cc4)N5CCCC5=O)OC)OC               |
| 434 | CCCOc1ccc(cc1OC)[C@H]2CN3C(=O)CN(C(=O)[C@ @]3([C@H]4C2=c5ccccc5=[NH+]4)C)CCCCO       |
| 435 | COc1cccc1[C@ @H](CNC(=O)c2ccc(cc2)S(=O)(=O)Nc3ccccc3OC)[NH+]4CCCC4                   |
| 436 | Cc1cnc(nc1Nc2cccc(c2)S(=O)(=O)NC(C)(C)C)Nc3ccc(cc3)OCC[NH+]4CCCC4                    |
| 437 | CCOc1cc(ccc1OCc2ccccc2C#N)/C=N\Nc3[nH+]c(nc(n3)N4CCCC4)N5CCCC5                       |
| 438 | Cc1ccc(cc1Nc2nccc(n2)c3cccnc3)NC(=O)/C=C/c4ccc(cc4)OCCC[NH+](C)C                     |
| 439 | Cc1cccc(c1)CS(=O)(=O)c2ncc(n2C3CCCC3)CN(CC[NH+](C)C)C(=O)NC(C)(C)C                   |
| 440 | CCOc1cccc(c1)c2ccc3[nH+]c(c(n3c2)CCC(=O)NCCc4ccccc4)c5ccc(cc5)OC                     |
| 441 | c1cc[nH+]c(c1)N/N=C\c2ccc(cc2)O[C@ @H]3[C@ @H](OCCO3)Oc4ccc(cc4)/C=N/Nc5ccccc5       |
| 442 | CCOc1ccc(cc1)n2c(nnc2SCC(=O)Nc3ccccc4c3ccccc4)COc5ccccc5                             |
| 443 | C[C@ @H]1Cc2cc(ccc2O1)C(=C3[C@H](N(C(=O)C3=O)CCOC)c4ccc(c(c4)OC)OCCC(C)C)O           |
| 444 | [H]/N=C\1/C(=C/c2cn(c3c2ccccc3)CCOc4ccc(cc4)C)/C(=O)N=C5N1N=C(S5)CCCCC               |
| 445 | [H]/N=C\1\C(=C\c2ccc(c(c2)OC)OCCCOc3ccc(cc3)CC)\C(=O)N=C4N1C(=CS4)c5ccc(cc5)F        |
| 446 | CCOc1cccc1[C@H]2[C@ @H]3CCCC[C@ @]3(CCN2C(=O)c4cc(c(c(c4)OCC)OCC)OCC)O               |
| 447 | CCCCN(CCCC)S(=O)(=O)c1ccc(cc1)NS(=O)(=O)c2ccc(cc2)OC(F)(F)F                          |
| 448 | CCCCOC(=O)c1c2c(nc3ccccc3n2)n(c1NC(=O)c4ccc(o4)Br)CC=C                               |
| 449 | Cc1ccc(cc1)[C@H](C(=O)NCCC(C)C)N(c2ccc(cc2)C(=O)C)C(=O)Cn3c4ccccc4nn3                |
| 450 | CC1=C([C@H](C2=C(N1)CC(CC2=O)(C)C)c3cc(c(c(c3)OC)OC)OC)C(=O)OCCOc4ccccc4             |
| 451 | CCCOC(=O)C1=C(NC2=C([C@ @H]1c3cc(c(c(c3)OC)OC)OC)C(=O)C[C@ @H](C2)c4ccccc4OC)C       |
| 452 | CC[C@ @H](C)OC(=O)C1=C(NC2=C([C@ @H]1c3ccccc3OCC)C(=O)C[C@ @H](C2)c4ccc(c(c4)OC)OC)C |
| 453 | CC1=C([C@H](C2=C(N1)C[C@ @H](CC2=O)c3ccccc3)c4cc(c(c(c4)OC)OC)OC)C(=O)OCCOC          |
| 454 | CCC(C)(C)n1c(nnn1)[C@ @H](c2cc3cccc(c3[nH]c2=O)C)N(CCc4ccccc4)Cc5ccccc5              |
| 455 | CC[C@ @H](c1nnnn1CCc2ccccc2)N(Cc3ccccc3C)Cc4cc5cc(ccc5[nH]c4=O)C                     |
| 456 | Cc1ccc(cc1)SCCNC(=O)CN(c2cc(cc(c2)C)C)S(=O)(=O)c3ccc(c(c3)OC)OC                      |
| 457 | CCCOc1cccc(c1)[C@ @H]2C(=C(C(=O)N2CCC[NH+](CC)CC)[O-])C(=O)c3ccc(cc3)OC(C)C          |
| 458 | CCN(CC)c1ccc(c(c1)C)NC(=O)c2cnc3c(c(nn3c2C)C)c4ccc(c(c4)OCC)OCC                      |
| 459 | CC(C)c1cc(c(s1)NC(=O)/C(=C\c2ccc(o2)COc3ccccc3)C(F)(F)F)/C#N)C(=O)OC                 |
| 460 | CCCOC(=O)C1=C(NC2=C([C@ @H]1c3ccc(c(c3)OC)OC)OC)C(=O)C[C@H](C2)c4ccccc4OC)C          |
| 461 | COc1cccc(c1)c2c(cn(n2)c3ccccc3)/C=C/4\C(=O)N(C(=S)S4)CCCCC(=O)O                      |
| 462 | CCOc1ccc(cc1)N(CC(=O)NCc2ccc(cc2)OC(C)C)S(=O)(=O)c3ccc(cc3)Cl                        |
| 463 | COc1ccc(cc1)CNC(=O)c2ccc(cc2)Cn3c4cnccc4nc3SCc5ccc(cc5)OC                            |
| 464 | CCOCCOc1nc(n(n1)c2ccc(cc2)NC(=O)c3ccc(cc3)C)c4cccc(c4)C(F)(F)F                       |
| 465 | CCOCCOc1nc(n(n1)c2ccc(cc2)NC(=O)c3ccccc3)F)c4cccc(c4)C(F)(F)F                        |
| 466 | CC(C)CN(CC(=O)Nc1nc(cn1c2ccc(c(c2)OC)OC)c3ccc(cc3)Cl)C(=O)C4CC4                      |
| 467 | CC(C)(C)OC[C@ @H](CN(Cc1cccc1)Cc2c(nn(c2Oc3ccc(cc3)F)C)c4ccccc4)O                    |
| 467 | C[C@ @H]1CCCCN1c2c(c(no2)c3ccccc3)CN(CCCOC)C[C@ @H](COCCc4ccccc4)O                   |

|     |                                                                                                 |
|-----|-------------------------------------------------------------------------------------------------|
| 468 | <chem>CC(C)(C)CC(C)(C)NC(=O)[C@H](c1ccc(cc1)N(C)C)N(Cc2ccco2)C(=O)c3ccccc3OC</chem>             |
| 469 | <chem>CCCN([C@H](c1ccc(cc1)C(F)(F)F)C(=O)NCS(=O)(=O)c2ccc(cc2)C)C(=O)c3ccco3</chem>             |
| 470 | <chem>COCCNC(=O)c1ccc(cc1)CSc2nnc(n2c3ccc(cc3)OC)c4ccccc4Cl</chem>                              |
| 471 | <chem>CCc1ccc(cc1)C(=O)c2cn(c3c(c2=O)ccc(n3)C)CC(=O)NCCc4ccc(c(c4)OC)OC</chem>                  |
| 472 | <chem>CC(=O)c1ccc(cc1)OC[C@@H](CN(Cc2ccc(o2)c3ccccc3)Cl)[C@@H]4CCS(=O)(=O)C4)O</chem>           |
| 473 | <chem>CCOCCCN(CC(=O)N(Cc1ccccc1)Cc2cccn2C)C(=O)Nc3ccc(cc3)SC</chem>                             |
| 474 | <chem>CCOc1cc(cc(c1OCc2cccc(c2)C)Cl)CNCCSc3nnnn3c4ccccc4</chem>                                 |
| 475 | <chem>[H]N=C\1/C(=C/c2cc(c(c(c2)OC)OCCOc3ccc(cc3)[C@H](C)CC)OC)/C(=O)N=C4N1C=CS4</chem>         |
| 476 | <chem>CC[C@H](c1nnnn1Cc2ccc(cc2)F)N(Cc3ccc(cc3)OC)Cc4cc5cc(ccc5[nH]c4=O)C</chem>                |
| 477 | <chem>CCOc1ccc(cc1)N(CC(=O)N/N=C\1/C)C2ccc(cc2)OC)S(=O)(=O)c3ccc(cc3)Cl</chem>                  |
| 478 | <chem>Cc1cc(cc(c1)N(CC(=O)N/N=C/c2ccc(cc2)SC)S(=O)(=O)c3ccc(c(c3)OC)OC)C</chem>                 |
| 479 | <chem>C[C@H](C(=O)Nc1ccc(cc1OC)OC)Sc2nc(cc(n2)C(F)(F)F)c3ccc(c(c3)OC)OC</chem>                  |
| 480 | <chem>CC(C)CCOP(=O)([C@](C(=O)OC)(C(F)(F)F)Nc1nc2ccccc2s1)OCCC(C)C</chem>                       |
| 481 | <chem>CC[C@@H](C)c1ccc(cc1)OCCn2cc(c3c2cccc3)/C=N\NC(=O)CSc4nnc(s4)C</chem>                     |
| 482 | <chem>CCCOc1ccc(cc1)NC(=O)[C@@H]2CC(=O)N(/C(=N/c3ccccc3)C(F)(F)F)/S2)CC(=O)OC</chem>            |
| 483 | <chem>CCOCCOc1nc(n(n1)c2cccc(c2)NC(=O)[C@@]3(C[C@@H]3F)Cl)c4cccc(c4)C(F)(F)F</chem>             |
| 484 | <chem>CN(C)c1ccc(cc1CN(CCOC)S(=O)(=O)c2cccc(c2)Cl)NC(=O)c3cccs3</chem>                          |
| 485 | <chem>COCCNC(=O)c1cccc1CSc2nnc(n2c3ccccc3)Cl)c4cccc(c4)OC</chem>                                |
| 486 | <chem>CC(C)(C)NC(=O)N(CCOC)Cc1ccc(c(c1)OS(=O)(=O)c2ccc(c(c2)Cl)Cl)OC</chem>                     |
| 487 | <chem>COc1ccc(cc1)c2cc(c(c(n2)SCC(=O)NCc3cc(cc3)OC)OC)C#N)c4cccs4</chem>                        |
| 488 | <chem>CCCOc1ccc(cc1)NC(=O)C[C@@H]2C(=O)N(/C(=N/c3ccc(cc3)OC)/S2)Cc4cccs4</chem>                 |
| 489 | <chem>CCOc1ccc(cc1OC)/C=c/2\c(=O)n(/c(=C/c(=O)OCC)/s2)CC(=O)N[C@@H]3CCC[C@@H]([C@@H]3C)C</chem> |
| 490 | <chem>CCOc1ccc(cc1F)c2c(cn(n2)c3ccccc3)/C=C\4/C(=O)N(C(=S)S4)CCCCC(=O)O</chem>                  |
| 491 | <chem>Cc1ccc(cc1C)Oc2cc(nc(n2)SC)n3cncn3</chem>                                                 |
| 492 | <chem>Cc1ccc(cc1)c2nnn(n2)Cc3ccc(cc3)C(=O)OC</chem>                                             |
| 493 | <chem>COc1ccc2c(c1)s/c(=N\C(=O)c3ccno3)/n2CC#C</chem>                                           |
| 494 | <chem>CC(C)c1nnc2n1nc(s2)c3ccc(cc3)OC)OC</chem>                                                 |
| 495 | <chem>Cc1cc(nc(n1)n2c(nc(n2)c3ccccc3OC)Cl)C</chem>                                              |
| 496 | <chem>C[C@@H]1[C@H](CC(C1)(C)C)Oc2c(n3ccsc3n2)[N+](=O)[O-]</chem>                               |
| 497 | <chem>C[C@@H]1[C@H](CC(C1)(C)C)Oc2c(n3ccsc3n2)[N+](=O)[O-]</chem>                               |
| 498 | <chem>CC1=C[C@H](N=N1)[C@H]2N=N[C@@H](N2/N=C/C=C/c3ccccc3)S</chem>                              |
| 499 | <chem>CN(C)c1c(c(ncn1)Sc2ccc(cc2)Cl)[N+](=O)[O-]</chem>                                         |
| 500 | <chem>c1cc(nc(c1[N+](=O)[O-])n2ccc(n2)C(F)(F)F)Cl</chem>                                        |
| 501 | <chem>CCn1c2ccccc2c3c1nc(nn3)n4c(cc(n4)C)C</chem>                                               |
| 502 | <chem>C[C@H](c1nc(no1)C(C)C)Sc2nnc(o2)c3ccccc3</chem>                                           |
| 503 | <chem>Cc1nc(no1)c2ccc(cc2)Oc3nc4ccccc4o3</chem>                                                 |
| 504 | <chem>CCSc1nnc2n1c3c(c4ccccc4n3CC)nn2</chem>                                                    |
| 504 | <chem>CN(Cc1ccccc1OC)c2nc(nc(n2)Cl)OC</chem>                                                    |

|     |                                                  |
|-----|--------------------------------------------------|
| 505 | CCOc1nc(nc(n1)Cl)N(C)Cc2ccc(o2)C                 |
| 506 | C1CCN(CC1)c2nc(nc(n2)Cl)OC[C@H]3CCCO3            |
| 507 | Cc1ccc(cc1C)Oc2nc(nc(n2)Cl)n3cccn3               |
| 508 | CC(C)Oc1nc(nc(n1)Cl)Oc2ccc(cc2)C#N               |
| 509 | CC[C@H](C)CN(C)c1nc(nc(n1)Cl)N2CCOCC2            |
| 510 | CCC[C@H](C)N(C)c1nc(nc(n1)Cl)n2cccn2             |
| 511 | CC[C@H]1CCCN(C1)c2nc(nc(n2)Cl)n3cccn3            |
| 512 | CCCOc1nc(nc(n1)Cl)N(C)C2CCOCC2                   |
| 513 | CCCOc1nc(nc(n1)Cl)N2CCOC[C@H]2CC                 |
| 514 | CC[C@H]1COCCN1c2nc(nc(n2)Cl)OC(C)C               |
| 515 | CC[C@H]1CO[C@H](CN1c2nc(nc(n2)Cl)N(C)C)C         |
| 516 | CCCOc1nc(nc(n1)Cl)N2CCOCC2(C)C                   |
| 517 | CC(C)Oc1nc(nc(n1)Cl)N(C)C[C@H]2CCCCO2            |
| 518 | CC(C)N(CC1CC1)c2nc(nc(n2)Cl)n3cccn3              |
| 519 | C[C@H]1CN(CC(O1)(C)C)c2nc(nc(n2)Cl)OC(C)C        |
| 520 | CC(C)Oc1nc(nc(n1)Cl)N(C)c2cccc(c2)OC             |
| 521 | CCCOc1nc(nc(n1)Cl)N(C)[C@H]2CCCN(C2)C            |
| 522 | CN(c1ccc(cc1)C#N)c2c(ccc(n2)Cl)[N+](=O)[O-]      |
| 523 | CC(C)Oc1nc(nc(n1)Cl)N(C)c2cccc(c2)C#N            |
| 524 | Cc1nc2cc(ccc2o1)c3nc(on3)/C=C/c4ccco4            |
| 525 | CCn1c2cc(ccc2nn1)c3nc(on3)c4cccs4                |
| 526 | Cn1cnc2c1cc(cc2)c3nc(on3)c4cccc(c4)OC            |
| 527 | Cc1ccc(c(c1C)OC(=O)c2nc3nc(cc(n3n2)C)C)C         |
| 528 | Cc1ccc(cc1)c2nc(on2)Cn3c4cccc4oc3=O              |
| 529 | CCCC[C@H]1C=CCN1C(=O)c2cc(n3c(n2)ncn3)C(C)C      |
| 530 | c1ccc2c(c1)nc(o2)Sc3nnnn3C4CCCC4                 |
| 531 | Cc1ccc2c(c1)nc(o2)N3CCC[C@H]3c4nc(on4)C(C)C      |
| 532 | Cc1ccc(cc1C)OCc2nc(no2)c3ccnc(c3)OC              |
| 533 | Cc1ccc(cc1OC)c2nc(no2)c3ccnc(c3)OC               |
| 534 | c1ccc2c(c1)nnn2OCc3cc(on3)c4cccs4                |
| 535 | CN1CCCC[C@H]1COc2nc(nc(n2)Cl)N3CCCC3             |
| 536 | COc1ccc(o1)c2nc(no2)c3cc4cccc4o3                 |
| 537 | C[C@H](Cn1c2c(ccc(c2Br)OC)cn1)N=[N+]=[N-]        |
| 538 | CCN(CC)c1nc(nc(n1)Cl)N2CCC[C@H](C2)N(C)C         |
| 539 | c1ccc2c(c1)cc(o2)c3nnc(o3)SCc4ccon4              |
| 540 | CCCCn1c(=O)c2cccc2n3c1nnc3SCC(=O)OC              |
| 541 | CCO[C@H]([C@H]1CC(=NO1)c2ccc(cc2)OC)n3c4cccc4nn3 |
| 541 | COc1ccc(cc1)n2c(nnn2)SCc3cc(ccc3OC)OC            |

|     |                                                   |
|-----|---------------------------------------------------|
| 542 | Cc1c(cco1)c2nnc(o2)SCC(=O)c3ccc(cc3OC)OC          |
| 543 | Cc1ccnc2n1nc(n2)C(=O)OCC(=O)c3ccc(cc3)C(C)(C)C    |
| 544 | c1ccc2c(c1)cc(o2)C(=O)COC(=O)CN3C(=O)c4cccc4C3=O  |
| 545 | Cc1cc(ccc1Cl)OCC(=O)Oc2cccc(c2)n3cnnn3            |
| 546 | COc1cc(ccc1OC(F)F)c2nc(on2)/C(=C/c3ccco3)/C#N     |
| 547 | CC(C)n1c(nnn1)SCc2coc(n2)c3ccc(cc3)OC             |
| 548 | CCCOc1cccc1C(=O)Oc2ccc(cc2)n3cnnn3                |
| 549 | CCOc1ccc(cc1)c2nc(c(o2)C)CN(C)Cc3c(non3)C         |
| 550 | Cc1c(nnc1SCc2nc(no2)c3ccco3)c4cccs4               |
| 551 | CCCN1c(nnn1)CSc2c3ccccc3nc(n2)c4ccco4             |
| 552 | c1cc(oc1)Cn2c(nnn2)SCc3coc(n3)c4ccc(cc4)F         |
| 553 | c1ccc(cc1)Cc2nc(on2)CSc3nnc(o3)c4ccco4            |
| 554 | CC(C)(C)n1c(nnn1)SCc2nc(no2)Cc3ccccc3             |
| 555 | CC(C)(C)Clc1nc(no1)c2ccc(cc2)OS(=O)(=O)N(C)C      |
| 556 | COc1nc(no1)c2ccc(nc2OC)c3ccc(cc3)OC               |
| 557 | c1ccc(c(c1)OCCOC(=O)c2ccc(cc2)n3cnnn3)Cl          |
| 558 | c1ccc2c(c1)C(=O)N(C2=O)CCCOc3ccc(cc3)c4nnco4      |
| 559 | CCOc1ccc(cc1)c2nc(cs2)C(=O)O[C@H](C)c3nc(no3)C    |
| 560 | COC(=O)c1cccc1OC(=O)CCc2nc(no2)c3ccsc3            |
| 561 | CCCN(Cc1ccc(cc1)C#N)S(=O)(=O)c2cccc2[N+](=O)[O-]  |
| 562 | COC(=O)c1cccc(c1)OCCSc2nnc(o2)c3cccn3             |
| 563 | Cc1ccc(cc1)OCCOc2ccc(cc2OC)/C=N/[C@@H]3N=CN=N3    |
| 564 | CCOc1cc(ccc1OCc2nc(no2)c3ccccc3)OC)C#N            |
| 565 | Cc1ccccc1C(=O)O[C@@H]2CCCC[C@@H]2n3cc(nn3)C(=O)OC |
| 566 | CC(C)Cc1nnc2n1nc(s2)Cc3cc(c(c3)OC)OC)OC           |
| 567 | COc1cc(cc(c1)OCc2nc(no2)COc3ccccc3)OC             |
| 568 | Cc1nc(no1)Cc2nc(on2)CCOc3ccccc3Cl)Cl              |
| 569 | COc1ccccc1OCc2ccc(o2)c3nc(no3)c4ccncc4            |
| 570 | C[C@@H](c1ncc(o1)C(C)(C)C)Sc2nnnn2C[C@@H]3CCCO3   |
| 571 | Cc1c2cc(sc2n(n1)C)C(=O)OCCOc3cnccc(n3)Cl          |
| 572 | CCO[C@H](C)c1nc(on1)CO/N=C\2/CCc3c2ccc(c3)OC      |
| 573 | c1ccc2c(c1)cccc2CCOC(=O)Cn3c(=O)c4ccnn4cn3        |
| 574 | CCCCc1ccc(cc1)n2c(nnn2)SCC(=O)c3cnn(c3)C          |
| 575 | CCO[C@H](C)c1nc(on1)CSc2nnc(n2C)c3ccccc3C         |
| 576 | CCc1c(nn(c(=O)c1C#N)Cc2nc(no2)CCC(C)C)CC          |
| 577 | CC(C)(C)c1nc(on1)CCC(=O)Oc2ccc3ccc(=O)oc3c2       |
| 578 | CCc1nc(on1)CN(Cc2nc(no2)CC)[C@H]3CCCC[C@@H]3CC    |

|     |                                                                                                                    |
|-----|--------------------------------------------------------------------------------------------------------------------|
| 579 | <chem>COc1ccc(cc1)OCCCc2nc(no2)c3ccc(cn3)C#N</chem>                                                                |
| 580 | <chem>CCCOc1ccc(cc1)OCc2nc(no2)c3ccc(cn3)C#N</chem>                                                                |
| 581 | <chem>C[C@H](Cc1ccc(cc1)OC)CN(C)c2cc(nc3n2ncn3)COC</chem>                                                          |
| 582 | <chem>C=CCn1c(nnc1Sc2ccccc2[N+](=O)[O-])c3ccncc3</chem>                                                            |
| 583 | <chem>COC(=O)c1cc(cnc1=O)CCC23CC4CC(C2)CC(C4)C3[N+](=O)[O-]</chem>                                                 |
| 584 | <chem>CCOc1ccc(cc1OC)C\2=Nc3ncnn3/C2=N\Cc4ccccc4</chem>                                                            |
| 585 | <chem>CCCOc1ccc(cc1)OC(=O)c2ccnc(c2)n3cncn3</chem>                                                                 |
| 586 | <chem>C/C(=C/C(=O)O[C@@H]1CCCC[C@H]1n2cc(nn2)C(=O)OC)/C3CC3</chem>                                                 |
| 587 | <chem>COc1ccc2c(c1)c(ccn2)Oc3cc(c(nc3)CC(=O)OC)OC</chem>                                                           |
| 588 | <chem>c1ccc(cc1)OCc2nnc(n2Cc3ccc3)SCC(=O)Nc4ccc(cc4)S(=O)(=O)N</chem>                                              |
| 589 | <chem>c1cc(cc(c1)Cl)NC(=S)N/N=C/c2ccc(o2)c3ccc(cc3)S(=O)(=O)Nc4ncccn4</chem>                                       |
| 590 | <chem>CC(C)c1ccc(cc1)/C=C/C(=O)NC(=S)Nc2ccc(cc2)S(=O)(=O)Nc3c(nccn3)OC</chem>                                      |
| 591 | <chem>CCC(=O)Nc1cc(ccc1C)NC(=O)CSc2nnc(n2C)c3ccc(cc3)NS(=O)(=O)C</chem>                                            |
| 592 | <chem>Cc1ccc(cc1)NS(=O)(=O)c2ccc(cc2)NC(=O)CCNS(=O)(=O)c3ccc(cc3)OC</chem>                                         |
| 593 | <chem>CCc1cccc1Nc2nc(nc(n2)N)CSc3nnc(n3C[C@H]4CCCO4)c5cccs5</chem>                                                 |
| 594 | <chem>CCN(CC)S(=O)(=O)c1cccc(c1)c2nnc(n2N)SCC(=O)Nc3ccc(cc3)Cl</chem>                                              |
| 595 | <chem>Cc1cc(ccc1OCC(=O)NC(=S)Nc2ccc(cc2)S(=O)(=O)Nc3nc(cc(n3)C)C)Cl</chem>                                         |
| 596 | <chem>CCN(CC)S(=O)(=O)c1cccc(c1)NC(=O)CSc2nnc(n2N)c3ccc(cc3)Cl</chem>                                              |
| 597 | <chem>CCc1nc2ccccc2n1CC(=O)NNC(=O)c3ccc(c(c3)S(=O)(=O)Nc4ccc4)Cl</chem>                                            |
| 598 | <chem>CCC[C@@]1(C(=O)N(C(=O)N1)CC(=O)Nc2ccc(cc2)C(=O)Nc3ccccc3OC)c4ccccc4</chem>                                   |
| 599 | <chem>Cc1ccc(cc1)S(=O)(=O)NCCc2nnc(s2)NS(=O)(=O)c3ccc(cc3)NC(=O)C</chem>                                           |
| 600 | <chem>Cc1ccc2c(c1)ccc2Cn3ccc(cc3)NC(=S)Nc4ccc(cc4)S(=O)(=O)Nc5ncccn5</chem>                                        |
| 601 | <chem>COc1cc(cc(c1)OC)NC(=O)CCSc2nc([nH]n2)N/N=C/c3cc(cc(c3[O-])Cl)Cl</chem>                                       |
| 602 | <chem>Cc1cccc(c1)[N-]S(=O)(=O)c2ccc(cc2)NC(=O)CCSc3nnc(n3N)C(F)(F)F</chem>                                         |
| 603 | <chem>Cc1c(c(n1)C(C)C)/C=N/Nc2[nH]nc(n2)SCC(=O)Nc3ccc(c(c3)Cl)Cl</chem>                                            |
| 604 | <chem>CC[C@H](C)Sc1nnc(s1)NC(=O)CSc2nc([nH]n2)N/N=C/c3cccc4c3cccc4</chem>                                          |
| 605 | <chem>COC(=O)c1c2c(sc1NC(=O)CCSc3nc([nH]n3)N/N=C/c4cccc5c4cccc5)CCC2</chem>                                        |
| 606 | <chem>COCc1nnc(n1N)SCCC(=O)Nc2ccc(cc2)S(=O)(=O)[N-]c3cccc(c3)Cl</chem>                                             |
| 607 | <chem>CCSc1nnc(s1)/N=C(/CSc2nnc(n2N)N/N=C/c3c4cccc4ccc3O)\[O-]</chem>                                              |
| 608 | <chem>CCSc1nnc(s1)/N=C(/CSc2nnc(n2N)N/N=C/c3c4cccc4ccc3[O-])\[O-]</chem>                                           |
| 609 | <chem>CC[C@H](C)Sc1nnc(s1)NC(=O)CSc2nc([nH]n2)N/N=C/c3ccc(cc3Cl)Cl</chem>                                          |
| 610 | <chem>CC[C@@H](C)Sc1nnc(s1)NC(=O)CSc2nc([nH]n2)N/N=C/c3cccc(c3Cl)Cl</chem>                                         |
| 611 | <chem>CCCN1c(=O)c2c(c(sc2nc1SCC(=O)c3c(n(c=O)[nH]c3=O)CCOC)N)C</chem>                                              |
| 612 | <chem>c1ccc2c(c1)C(=O)N(C2=O)CCCCC(=O)Nc3nc4c(c(n3)[O-])ncn4[C@H]5[C@H]([C@@H]([C@@H](O5)CO)O)O</chem>             |
| 613 | <chem>CCOCCNC(=O)c1ccc(c(c1)NC(=O)Nc2cccc(c2)OC)N3C[C@H]4C[C@H](C3)c5cccc(=O)n5C4</chem>                           |
| 614 | <chem>Cc1c(sc(n1)C)C(=O)C2=C(C(=O)N([C@H]2c3ccc(cc3)OCC(=O)N)CCn4cc[nH+]c4)[O-]</chem>                             |
| 615 | <chem>CC(=O)OC[C@@H]([C@H]1CC[C@@]2([C@@]1(CC[C@@H]3[C@@H]2CC[C@@]4([C@@]3(CC[C@@H](C4)OC(=O)C)COC(=O)C)O)O</chem> |

|     |                                                                                                                                                   |
|-----|---------------------------------------------------------------------------------------------------------------------------------------------------|
| 616 | <chem>Cc1cccc1CN(c2ccc(cc2)C(=O)N/N=C/c3ccc(cc3)OCC(=O)N)S(=O)(=O)C</chem>                                                                        |
| 617 | <chem>CC(C)CN(CC(C)C)S(=O)(=O)c1ccc(cc1)C(=O)Nc2c(ccs2)C(=O)NNC(=O)C</chem>                                                                       |
| 618 | <chem>Cc1cc(nc(n1)N/C(=N\CCc2c[nH]c3c2cc(cc3)Cl)/NC(=O)CSc4nnc(s4)C)C</chem>                                                                      |
| 619 | <chem>c1cc(oc1)/C=N/Nc2[nH]nc(n2)SCC(=O)Nc3nnc(s3)SCc4ccc(cc4)Cl</chem>                                                                           |
| 620 | <chem>C/C(=N/Nc1[nH]nc(n1)SCC(=O)Nc2cccc(c2)Br)/c3ccc(cc3OC)OC</chem>                                                                             |
| 621 | <chem>CCOCSc1nnc(s1)NC(=O)CSc2nnc(n2N)c3cccc(c3)Br</chem>                                                                                         |
| 622 | <chem>CCOCSc1nnc(s1)NC(=O)CSc2nnc(n2N)c3ccc(cc3)Br</chem>                                                                                         |
| 623 | <chem>C/C(=N/Nc1[nH]nc(n1)SCC(=O)Nc2ccc3c(c2)sc(n3)SCC=C)/c4cccnc4</chem>                                                                         |
| 624 | <chem>Cc1cc(nc(n1)NS(=O)(=O)c2ccc(cc2)NC(=S)NC(=O)COc3ccc(cc3Cl)Cl)C</chem>                                                                       |
| 625 | <chem>Cc1cc(c(c(c1)NS(=O)(=O)C)C)S(=O)(=O)Nc2ccc(cc2)CC(=O)NCC(=O)OC)C</chem>                                                                     |
| 626 | <chem>CC(C)CC[C@]1(C(=O)NC(=NC1=O)[O-])Cc2ccccc2CC3(C(=O)NC(=O)NC3=O)CCC(C)C</chem>                                                               |
| 627 | <chem>c1cc[nH]/c(=N\S(=O)(=O)c2ccc(cc2)/N=N/c3cc(c(c3)C(=O)[O-])O)c4ccc(cc4)S(=O)(=O)Nc5cccn5)/c1</chem>                                          |
| 628 | <chem>C[C@H](CCc1cc(cc(c1O)C[C@H](C=C)C)O)c2c(c(=O)c3c(o2)cc(c(c3[O-])OC)O)OC)CO</chem>                                                           |
| 629 | <chem>CC(C)[C@H](C(=O)N[C@@H](CC(=O)[O-][C@@H]1CCOC(C1)(C)C)NC(=O)CO/N=C/2\CC[C@@]3([C@@H]4CC[C@]5([C@@H]([C@@H]4CCC3=2)CC[C@@]5(C#C)O)C)C</chem> |
| 630 | <chem>CC(C)[C@H](C(=O)N[C@@H](CC(=O)[O-])CS)NC(=O)CO/N=C1/CC[C@@]2([C@@H]3CC[C@]4([C@@H]([C@@H]3CCC2=C1)CC[C@@]4(C#C)O)C)C</chem>                 |
| 631 | <chem>c1ccc(c(c1)c2nnn(n2)CC(=O)NNC(=S)Nc3cc(cc3)Cl)Cl)Oc4ccc(cc4Cl)Cl</chem>                                                                     |
| 632 | <chem>CCOc1cc(cc(c1OCC(=O)N(C)C)Br)/C=N\Nc2ccc(cc2)S(=O)(=O)N</chem>                                                                              |
| 633 | <chem>Cc1cc(ccc1OCC(=O)NC(=S)Nc2ccc(cc2)S(=O)(=O)Nc3cc(on3)C)Br</chem>                                                                            |
| 634 | <chem>Cc1ccc(cc1)C(=O)Oc2ccc(cc2)/C=N/NC(=O)C(=O)Nc3ccccc3C(=O)Nc4ccc(cc4)C</chem>                                                                |
| 635 | <chem>COc1ccc(cc1)c2c(cn2)c3ccccc3)/C=N/NC(=O)C(=O)Nc4ccccc4C(=O)Nc5ccc(cc5)Br</chem>                                                             |
| 636 | <chem>c1cc[nH+]c(c1)CN(CCNc2ccc(c(c2)C(=O)[O-])c3c4ccc(cc4oc-5cc(=O)ccc35)O)Cc6cccn6</chem>                                                       |
| 637 | <chem>c1cc(cc(c1)Br)Nc2nc(nc(n2)NN)Nc3cccc(c3)Br</chem>                                                                                           |
| 638 | <chem>c1ccc(cc1)n2c(c(c(n2)/C=C/c3ccc(cc3)/C=C(\C#N)/c4c(c(n4)c5ccccc5)N)C#N)/C#N)C#N)N</chem>                                                    |
| 639 | <chem>C[C@]12CC[C@H]([C@]([C@H]1Cc3c(nc(s3)NC(=O)C(C)C)[C@H]2CC(=O)NC4CCCC4)(C)CO)O</chem>                                                        |
| 640 | <chem>c1cc2c(cc1NC(=S)NC(=O)/C=C/c3ccc(o3)c4ccc(cc4Cl)Cl)[nH]c(=O)[nH]2</chem>                                                                    |
| 641 | <chem>Cc1cc(no1)NS(=O)(=O)c2ccc(cc2)Nc3nc(cs3)c4ccc(c(c4)O)O</chem>                                                                               |
| 642 | <chem>Cc1cccc(c1C)n2c3c(cn2)c(nc(n3)SCC(=O)Nc4ccc(cc4)C(=O)N)O</chem>                                                                             |
| 643 | <chem>Cc1cccc1Nc2nc(nc(n2)N)CN3C(=O)[C@](NC3=O)(C)c4ccc5ccccc5c4</chem>                                                                           |
| 644 | <chem>c1cc(ccc1c2c(c[nH]n2)[C@@H]3c4c(n[nH]c4OC(=C3C#N)N)c5ccc(c(c5)Cl)Cl)F</chem>                                                                |
| 645 | <chem>CCc1cccc1Nc2nc(nc(n2)N)CN3C(=O)[C@](NC3=O)(C)c4ccc5ccccc5c4</chem>                                                                          |
| 646 | <chem>c1ccc(cc1)Nc2c3c(c4c(n2)c(ns4)O)OC(=C([C@H]3c5ccc(cc5)Br)C#N)N</chem>                                                                       |
| 647 | <chem>CCc1c(c(c(=O)n1c2ccccc2N)Sc3nnnn3C)N)c4ccc(cc4)Cl</chem>                                                                                    |
| 648 | <chem>Cc1ccc(cc1Cl)N/C(=N/c2[nH]c(cc(=O)n2)CSc3nc4ccccc4s3)/N</chem>                                                                              |
| 649 | <chem>Cc1cccc(c1NC(=O)Cn2c(c(nn2)C(=O)Nc3ccc(cc3)Br)N)C</chem>                                                                                    |
| 650 | <chem>Cn1c2c(nc1Sc3nnc(n3N)N/N=C/c4c5ccccc5ccc4O)n(c(=O)n(c2=O)C)C</chem>                                                                         |
| 651 | <chem>c1ccc(c(c1)CSc2nnc(n2N)N/N=C/c3cc(ccc3O)Br)Cl</chem>                                                                                        |
| 652 | <chem>Cc1cc(c(c(c1)C)NC(=O)Cn2c(c(c(n2)NC)c3nc(no3)c4cccc(c4)Cl)N)C</chem>                                                                        |

|     |                                                                                                                                                                |
|-----|----------------------------------------------------------------------------------------------------------------------------------------------------------------|
| 653 | CCN(CC)c1c(c2c3c(nc2c(n1)N)N)N(C(=O)C3)c4ccc(c(c4)OC)OC)C#N                                                                                                    |
| 654 | CCN(CC)c1ccc2c(c1)Oc3cc(ccc3C24c5ccc(c(c5C(=O)O4)N)N)N(CC)CC                                                                                                   |
| 655 | C[C@]12CC[C@H]3[C@H]([C@]1(CC[C@]@H]2C4=CC(=O)OC4)O)CC[C@]@]5([C@]@]3(CC[C@H](C5)O)/C=N/Nc6cccc6)O                                                             |
| 656 | C[C@H](C(=O)N/[NH+]=C/c1cc(cc(c1[O-])Br)Br)Nc2c(=O)[nH]c(nn2)[O-]                                                                                              |
| 657 | Cc1cc(c(cc1NS(=O)(=O)c2ccc3c4c2cccc4C(=O)N3)Sc5[nH]jncn5)O                                                                                                     |
| 658 | C[C@]@H]1CCC[C@]@H](N1c2[nH]c(=O)c3c(n2)NC(=O)C[C@]@H]3C(=O)Nc4ccc(cc4)NC(=O)C)C                                                                               |
| 659 | COc1ccc(cc1)C2=C[C@H](N=N2)[C@]@H]3NN[C@]@H](N3N)SCc4c(cccc4Cl)Cl                                                                                              |
| 660 | c1cc(cc(c1)Cl)Nc2[nH]c(=O)c3c(n2)NC(=O)C[C@]@H]3C(=O)Nc4ccc(cc4Cl)Cl                                                                                           |
| 661 | Cc1cc(cc(c1)NC(=O)[C@]@H]2CC(=O)Nc3c2c(=O)[nH]c(n3)Nc4cc(cc(c4)Cl)Cl)C                                                                                         |
| 662 | Cc1ccc(c(c1)NC(=O)[C@H]2CC(=O)Nc3c2c(=O)[nH]c(n3)Nc4ccc(cc4Cl)Cl)C                                                                                             |
| 663 | Cc1cccc(c1O)c2cc(n[nH]2)C(=O)Nc3ccc(cc3)S(=O)(=O)/N=c/4\[nH]ccs4                                                                                               |
| 664 | Cc1cc(c(c(c1)O)c2cc(n[nH]2)C(=O)Nc3ccc(cc3)S(=O)(=O)Nc4c(c(n4)C)C)C                                                                                            |
| 665 | Cc1ccc(nc1)Nc2c(c(ncn2)Nc3cc(c(cc3C)[C@H](C#N)c4ccc(cc4)Cl)Cl)N                                                                                                |
| 666 | c1cc(ccc1C(=O)NNc2c(c(ncn2)Nc3ccc(cc3F)Br)N)Br                                                                                                                 |
| 667 | c1cc2ccncc2c(c1)Sc3c(c(ncn3)N)NC(=O)c4ccc(cc4)Br)N                                                                                                             |
| 668 | c1cc(ccc1C(=O)Nc2nc3c(s2)CCC[C@]@H]3C(=O)Nc4nc(cs4)CC(=O)N)Cl                                                                                                  |
| 669 | c1cc(c(cc1NC(=O)[C@H]2CC(=O)Nc3c2c(nc(n3)N4CCCC4)N)C(F)(F)F)Cl                                                                                                 |
| 670 | c1cc(ccc1N/N=C\2/[C@]@H](OC(=O)/C2=N\Nc3ccc(cc3)Br)[C@]@H](CO)O)Br                                                                                             |
| 671 | CC1=C(C(=O)O)[C@]@H](C1)[C@]@H](C)[C@H]2[C@]@H](C[C@]@H]3[C@]@]2(CC[C@]@H]4[C@]@H]3[C@H]5[C@H](O5)[C@]@]6([C@]@]4([C@H](C[C@]@H](C6)O)O)C)O)C)O)C              |
| 672 | C[C@]12CC[C@]@H]([C@]([C@]@H]1CC[C@]@]3([C@]@H]2CC=C4[C@]3(CC[C@]@]5([C@]@H]4CC(C[C@H]5O)(C)C)C)C)(C)CO)O[C@]@H]6[C@]@H]([C@]([C@]@H]([C@H](O6)C(=O)[O-])O)O)O |
| 673 | Cc1c(c(n[nH]1)O)[C@]@H](c2ccc(c(c2)Br)OCc3cccc4c3cccc4)c5c(n[nH]c5O)C                                                                                          |
| 674 | Cn1c(c(c(=O)[nH]c1=O)c2c3c([nH]c2c4ccc(cc4)C5CCCC5)n(c(=O)nc3[O-])C)N                                                                                          |
| 675 | C[C@]@H]1[C@H]([C@]@H]([C@]@H]([C@]@H](O1)O)[C@H]2CC[C@]3([C@]@H](C2)CC[C@]@H]4[C@]@H]3CC[C@]5([C@]@]4(CC[C@]@H]5C6=CC(=O)OC6)O)C)C)O)O                        |
| 676 | C[C@]1(C(=O)N(C(=O)N1)CC(=O)Nc2ccc(cc2)S(=O)(=O)N)c3cccc(c3)Br                                                                                                 |
| 677 | C[C@]12CC[C@]@H](C([C@H]1CC[C@]@]3([C@]@H]2C=C[C@]@H]4[C@]3(CC[C@]@]5([C@]@H]4CC(CC5)(C)C)C(=O)O)C)C)(C)CO[C@]@H]6[C@]@H]([C@]@H]([C@H](O6)CO)O)O              |
| 678 | CCOc1ccc(cc1)c2c3c([nH]n2)OC(=C([C@]@]34c5c(ccc(c5Br)C)NC4=O)C#N)N                                                                                             |
| 679 | C/C(=N/NC(=O)c1ccc(c(c1)S(=O)(=O)N)Cl)/c2ccc3c(c2)Nc4cccc4S3                                                                                                   |
| 680 | Cc1ccc2c(c1Br)[C@]@]3(c4c(n[nH]c4OC(=C3C#N)N)c5cc(c(c(c5)OC)OC)OC)C(=O)N2                                                                                      |
| 681 | c1ccc(cc1)n2c(=O)c3c([nH]2)NC4=C([C@H]3c5ccc(c(c5)O)O)C(=O)C[C@]@H](C4)c6cccc6                                                                                 |
| 682 | Cc1c(c(n[nH]1)O)[C@]@H](c2cc(c(c2)I)OC(C)I)c3c(n[nH]c3O)C                                                                                                      |
| 683 | c1ccc(cc1)c2cc(n[nH]2)c3nnc(n3N)SCC(=O)Nc4ccc(c(c4)Cl)Cl                                                                                                       |
| 684 | C[C@]@H]([C@H]1CC[C@]@H]2[C@]@]1(CC[C@]@H]3[C@]@H]2CC[C@]@H]4[C@]@]3(CC[C@H](C4)O)[C@H]5[C@]@H]([C@H]([C@]@H]([C@]@H](O5)C(=O)[O-])O)O)C)C)O                   |
| 685 | c1cc(cc(c1)Cl)NC(=O)CSc2nnc(n2N)c3cc(n[nH]3)c4ccc(cc4)Cl                                                                                                       |
| 686 |                                                                                                                                                                |
| 687 |                                                                                                                                                                |
| 688 |                                                                                                                                                                |
| 689 |                                                                                                                                                                |



|     |                                                                                                                                                               |
|-----|---------------------------------------------------------------------------------------------------------------------------------------------------------------|
| 690 | c1ccc2c(c1)cccc2NC(=O)CSc3nnc(n3N)c4cc(n[nH]4)c5ccc(cc5)Cl                                                                                                    |
| 691 | Cc1ccc(cc1)/C=N/n2c(c(c3c2nc4cccc4n3)C(=O)Nc5cc(ccc5C)C)N                                                                                                     |
| 692 | CC1([C@@H](N(C(=S)S1)NC(=O)Nc2ccc(cc2)Cl)N(C(=O)Nc3cccc4c3cccc4)[O-])C                                                                                        |
| 693 | c1ccc2c(c1)c(cc(n2)O)C(=O)NNC(=O)c3ccc(cc3)[N-]S(=O)(=O)c4cccs4                                                                                               |
| 694 | Cc1c2c([nH]n1)OC(=C([C@@H]2c3ccc(c(c3)COc4ccc(cc4Cl)Cl)OC)C#N)N                                                                                               |
| 695 | CC1=C([C@@H](C(=C(N1)SCC(=O)N)C#N)c2ccc2)/C(=N/c3nc4cccc4s3)/[O-]                                                                                             |
| 696 | c1cc(c(nc1)NC(=O)c2ccc(cc2)NS(=O)(=O)c3ccc(s3)Br)O                                                                                                            |
| 697 | CC(=O)Nc1ccc(cc1)[C@H](/C(=N)NC(=O)c2ccncc2)/c3c(nc4cc(ccc4n3)Cl)[O-]O                                                                                        |
| 698 | Cc1ccc2c(c1)c(cc(n2)c3ccc(cc3)NC(=O)C)C(=O)Nc4ccc(cc4)NC(=O)C                                                                                                 |
| 699 | Cc1c(c(n(n1)c2cccc2)O)[C@H](c3ccc(c(c3)O)O)c4c(nn(c4[O-])c5cccc5)C                                                                                            |
| 700 | C/C=C/1\C(=O)N[C@H](C(=O)O[C@H]2CC(=O)N[C@@H](C(=O)N[C@H](CSSCC/C=C2)\C(=N1)\[O-])C(C)C)C(C)C                                                                 |
| 701 | Cc1ccc(c(c1)[C@H](c2c([nH]c(=S)n(c2=O)C(C)C)[O-])[C@H]3[C@@H](N(C(=S)NC3=O)C(C)C)O)N(C)C                                                                      |
| 702 | c1cc(c(cc1Cl)c2ccc(o2)[C@H]3c4c([nH]c(=O)[nH]c4=O)NC5=C3C(=O)CCC5)Cl                                                                                          |
| 703 | c1cc(oc1c2cc(cc(c2)Cl)Cl)[C@H]3c4c([nH]c(=O)[nH]c4=O)NC5=C3C(=O)CCC5                                                                                          |
| 704 | c1ccc(c(c1)C(=O)N)[N-]C2=NC(=O)/C(=C/3\c4cc(ccc4NC3=O)Br)/S2                                                                                                  |
| 705 | c1cc(c(cc1Cl)Cl)Nc2nc3c(c(n2)[O-])[C@H](CC(=O)N3)C(=O)NC4CCCC4                                                                                                |
| 706 | [H]/N=C/1\Nc2nc3cccc3n2[C@H](N1)c4ccc(cc4)N5[C@@H](CC(=N5)c6cccc6)c7cccc7                                                                                     |
| 707 | CCc1c(nnn1c2c(non2)N)C(=O)N/N=C/3/c4cc(ccc4N=C3[O-])Br                                                                                                        |
| 708 | CC1(CC2=C(C(=O)C1)[C@@]3(c4cccc4NC3=O)N=C(N2)Nc5nc6cccc6s5)C                                                                                                  |
| 709 | c1cc(ccc1N2CCN(CC2)c3c(c(ncn3)Nc4c(cc(cn4)C(F)(F)F)Cl)N)F                                                                                                     |
| 710 | Cc1c2c([nH]n1)OC(=C([C@H]2c3ccc(c(c3)CSc4nc5cccc5s4)OC)C#N)N                                                                                                  |
| 711 | c1cc(ccc1c2nnc(n2N)SCC(=O)N/N=C/c3cc(ccc3[O-])Cl)Br                                                                                                           |
| 712 | CCCN1c2cccc2[C@@H](C(=C1[O-])/C(=N/N=C(\C)/[C@@H]3C(=c4cccc4=[NH+]C3=O)O)/[O-])O                                                                              |
| 713 | CC[C@H]1CC2=c3cccc3=[NH+][C@H]2[C@@H](N1)c4c([nH]c(=S)n(c4=O)c5ccc(cc5)OC)[O-]                                                                                |
| 714 | c1ccc(cc1)C(=O)N[C@H]2Nc3cc(ccc3S2)NC(=O)[C@H]4C=C(N=N4)c5cccs5                                                                                               |
| 715 | C[C@@H]1CC[C@@]2(CC[C@@]3(C(=CC[C@@H]4[C@@]3(CC[C@H]5[C@@]4(CC[C@@H](C5(C)C)O[C@H]6[C@@H]([C@H]([C@@H]([C@H](O6)C)O)O)C)C)[C@@H]2[C@H]1C)C(=O)[O-])C(=O)[O-]  |
| 716 | C[C@@H]1[C@H]([C@@H]([C@H]([C@@H](O1)O[C@H]2CC[C@]3([C@@H](C2(C)C)CC[C@@]4([C@H]3CC=C5[C@]4(CC[C@@]6([C@@H]5CC(CC6)C)C)C(=O)[O-])C(=O)[O-])C)O)O              |
| 717 | C[C@@H]1CC[C@@]2(CC[C@@]3(C(=CC[C@@H]4[C@@]3(CC[C@H]5[C@@]4(CC[C@@H](C5(C)C)O[C@H]6[C@@H]([C@H]([C@H]([C@H](O6)C)O)O)O)C)C)[C@@H]2[C@H]1C)C(=O)[O-])C(=O)[O-] |
| 718 | C[C@@H]1CC[C@@]2(CC[C@@]3(C(=CC[C@@H]4[C@@]3(CC[C@H]5[C@@]4(CC[C@@H](C5(C)C)O[C@H]6[C@@H]([C@H]([C@H]([C@H](O6)C)O)O)O)C)C)[C@@H]2[C@H]1C)C(=O)[O-])C(=O)[O-] |
| 719 | C[C@@H]1CC[C@@]2(CC[C@@]3(C4=CC[C@H]5[C@@]([C@H]4CC[C@]3([C@@H]2[C@H]1C)C)(CC[C@@H](C5(C)C)O[C@H]6[C@@H]([C@H]([C@@H]([C@H](O6)C)O)O)O)C)C(=O)O               |
| 720 | C[C@@]12CC[C@@H]([C@@]([C@H]1CC[C@@]3([C@H]2CC=C4[C@]3[C@H]([C@@]5([C@H]4CC(CC5)(C)C)C(=O)[O-])O)C)C(=O)[O-])O[C@H]6[C@@H]([C@H]([C@@H](CO6)O)O)O             |
| 721 | C[C@@H]1CC[C@@]2(CC[C@@]3(C(=CC[C@H]4[C@@]3(CC[C@@H]5[C@@]4(CC[C@@H](C5(C)C)O[C@H]6[C@@H]([C@H]([C@@H]([C@H](O6)C)O)O)O)C)C)[C@@H]2[C@H]1C)C(=O)[O-])C(=O)O   |
| 722 | COc1ccc2c(c1)c3c([nH]2)[C@@H](NCC3)c4c(=O)[nH]c(=O)n(c4[O-])c5ccc(cc5)I                                                                                       |
| 723 |                                                                                                                                                               |
| 724 |                                                                                                                                                               |
| 725 |                                                                                                                                                               |
| 726 |                                                                                                                                                               |

|     |                                                                                         |
|-----|-----------------------------------------------------------------------------------------|
| 727 | c1ccc2c(c1)N/C(=C\3/C(=O)NC(=O)N(C3=O)c4ccc(cc4)Cl)/C[C@H](S2)c5cccc(c5)O               |
| 728 | CSc1ccc(cc1)c2ccc3c(c2)C(=O)N4CC[C@@H](C[C@H]4C(=O)N3)NC(=O)[C@@H]5CSCN5                |
| 729 | COc1cccc(c1OC)[C@@H]2c3c(n[nH]c3OC(=C2C#N)N)c4ccc(cc4)Br                                |
| 730 | C[C@]1(C(=O)NC(=O)N1)c2cccc(c2)NC(=O)c3c(nc(s3)c4cccc4)c5cccc5                          |
| 731 | c1cc(cc(c1)Br)S(=O)(=O)Nc2cc(cc(c2)C(F)(F)F)c3[nH]c(=O)[nH]n3                           |
| 732 | COc1ccc(c(c1)[C@H]2c3c(n[nH]c3OC(=C2C#N)N)c4ccc(c(c4)Cl)Cl)OC                           |
| 733 | Cc1cccc(c1)N2C3=NC(=O)[C@](C3=C(NC2=O)[O-])(C(F)(F)F)NS(=O)(=O)c4ccc(cc4)N              |
| 734 | c1ccc(c(c1)N2C3=NC(=O)[C@](C3=C(NC2=O)[O-])(C(F)(F)F)[N-]S(=O)(=O)c4ccc(cc4)N)F         |
| 735 | c1ccc(c(c1)N2C3=NC(=O)[C@](C3=C(NC2=O)[O-])(C(F)(F)F)[N-]S(=O)(=O)c4ccc(cc4)N)F         |
| 736 | Cc1nc(n(n1)CC(=O)Nc2c(c3c(s2)CCC3)C(=O)N)c4ccc(c(c4)Cl)Cl                               |
| 737 | c1cc(sc1)S(=O)(=O)[N-]c2ccc(cc2)C(=O)NNC(=O)c3cc(ccc3O)Cl                               |
| 738 | c1ccc2cc(ccc2c1)c3cc(n[nH]3)C(=O)N/N=C/4\c5cc(ccc5NC4=O)Br                              |
| 739 | c1ccc(cc1)[C@H]2CC3=C([C@@H](C(=C(N3c4[nH]ncn4)N)C#N)c5ccc(cc5)Br)C(=O)C2               |
| 740 | CC\1=NNC(=O)/C1=N/Nc2cc(ccc2Cl)C(=O)Nc3cc(c(cc3Cl)Cl)Cl                                 |
| 741 | c1c(cc(c(c1C(=O)Nc2cc([nH]n2)C(=O)[O-])O)I)                                             |
| 742 | Cc1ccc2c(c1)[C@]3(c4c(nc(nc4[O-])SCc5cccc(c5)F)NC(=C3C#N)N)C(=O)N2                      |
| 743 | COc1ccc(cc1OC)[C@@H]2CC3=C([C@@H](c4c([nH]nc4O)N3)c5ccc(cc5Cl)Cl)C(=O)C2                |
| 744 | COc1ccc(cc1OC)[C@@H]2CC3=C([C@@H](c4c([nH]nc4O)N3)c5ccc(cc5)SC)C(=O)C2                  |
| 745 | C[C@H]1CCCCN1Cc2c(nnn2c3c(non3)N)C(=O)N/N=C\c4cc(c(c4)Br)[O-]Br                         |
| 746 | c1ccc(cc1)C(=O)C(CCc2nnc(s2)N)(CCc3nnc(s3)N)CCc4nnc(s4)N                                |
| 747 | c1cc(oc1)CNS(=O)(=O)c2ccc-3c(c2)C(=NNC(=S)N)c4c3ccc(c4)S(=O)(=O)NCc5cccc5               |
| 748 | CCC(C)(C)NC(=O)[C@H](c1ccc(cc1)OCC)N(Cc2ccco2)C(=O)c3c(c(ns3)C(=O)N)N                   |
| 749 | CCOC(=O)CNC(=O)[C@H](c1cccs1)N(c2cccc2OC)C(=O)c3c(c(ns3)C(=O)N)N                        |
| 750 | CCc1ccc(cc1)N([C@H](c2ccc(cc2)N(C)C)C(=O)NCCOC)C(=O)c3c(c(ns3)C(=O)N)N                  |
| 751 | CCc1cccc1N([C@H](c2ccc(o2)C)C(=O)NCC(=O)OCC)C(=O)c3c(c(ns3)C(=O)N)N                     |
| 752 | CN(C)c1ccc(cc1)[C@H](C(=O)NCCOC)N(c2cccc2F)C(=O)c3c(c(ns3)C(=O)N)N                      |
| 753 | COCCNC(=O)[C@H](c1ccc(cc1)OC)N(Cc2cccs2)C(=O)c3c(c(ns3)C(=O)N)N                         |
| 754 | Cc1ccc(cc1)N([C@H](c2ccc(cc2)N(C)C)C(=O)NCCOC)C(=O)c3c(c(ns3)C(=O)N)N                   |
| 755 | Cc1cccc(c1)N([C@H](c2ccc(cc2)N(C)C)C(=O)NCCOC)C(=O)c3c(c(ns3)C(=O)N)N                   |
| 756 | Cc1ccc(cc1)[C@H](C(=O)NC(C)(C)N(c2ccc(c2)OC)OC)C(=O)c3c(c(ns3)C(=O)N)N                  |
| 757 | Cc1ccc2c(c1)/C(=N\O[C@@H]3[C@H]([C@H]([C@H]([C@H](O3)CO)O)O)NC(=O)C)/C(=O)N2CCOc4cccc4C |
| 758 | Cc1ccc(c(c1)C)NS(=O)(=O)c2cccc(c2)C(=O)NNS(=O)(=O)c3ccc(cc3)NC(=O)C                     |
| 759 | c1cc2cccc3c2c(c1)C(=O)N(C3=O)CCCC(=O)OCC(=O)Nc4cc(cc(c4)C(=O)N)C(=O)N                   |
| 760 | CCN(CC)c1ccc(cc1)/C=N/Nc2nnc(n2N)SCC(=O)Nc3cc(ccc3OC)Cl                                 |
| 761 | Cc1cccc(c1)NS(=O)(=O)c2ccc(cc2)NC(=O)CCSc3nnc(n3N)c4cccnc4                              |
| 762 | Cn1cc(cn1)/C=N/Nc2[nH]nc(n2)SCC(=O)Nc3ccc(cc3)S(=O)(=O)NC4CCCC4                         |
| 763 | COCCSc1nnc(s1)NC(=O)CSc2nc([nH]n2)N/N=C/c3c4cccc4ccc3O                                  |

|     |                                                                                                                                                 |
|-----|-------------------------------------------------------------------------------------------------------------------------------------------------|
| 764 | Cc1c(c(n1)C(C)C)/C=N/Nc2nnc(n2N)SCC(=O)Nc3nnc(s3)SCC(C)C                                                                                        |
| 765 | Cc1c(c(n1)C(C)C)/C=N/Nc2nnc(n2N)SCCC(=O)Nc3ccc(cc3)Br                                                                                           |
| 766 | Cc1c(c(n1)C(C)C)/C=N/Nc2nnc(n2N)SCCC(=O)Nc3c(cccc3Cl)Cl                                                                                         |
| 767 | c1ccc2c(c1)cccc2/C=N/Nc3nnc(n3N)SCCC(=O)Nc4cccc(c4)N5CCCC5=O                                                                                    |
| 768 | c1ccc2c(c1)cccc2/C=N/Nc3nnc(n3N)SCCC(=O)Nc4ccc(cc4)S(=O)(=O)N                                                                                   |
| 769 | Cc1cc(ccc1NC(=O)CSc2nnc(n2N)N/N=C/c3ccc(cc3)C(=O)OC)Br                                                                                          |
| 770 | COC(=O)c1ccc(cc1)/C=N/Nc2nnc(n2N)SCC(=O)NCc3ccc(c(c3)Cl)Cl                                                                                      |
| 771 | CC(=O)Nc1cccc(c1)NC(=O)CCSc2nnc(n2N)N/N=C/c3c4cccc4ccc3O                                                                                        |
| 772 | Cc1ccc(cc1)/C=N/Nc2nnc(n2N)SCC(=O)Nc3ccc(cc3)S(=O)(=O)NC(C)(C)C                                                                                 |
| 773 | COc1cc(ccc1Cl)NC(=O)CSc2nnc(n2N)N/N=C/c3cc(c(c(c3)OC)OC)OC                                                                                      |
| 774 | COc1cc(cc(c1OC)OC)/C=N/Nc2nnc(n2N)SCCC(=O)Nc3ccc(cc3)Cl                                                                                         |
| 775 | Cc1ccc(cc1)NS(=O)(=O)c2ccc(cc2)NC(=O)CSc3nc([nH]n3)N/N=C/c4cccc4                                                                                |
| 776 | c1cc(ccc1NC(=O)CSc2nnc(n2N)N/N=C/c3ccc(cc3O)Cl)OC(F)(F)F                                                                                        |
| 777 | CCOc1ccc(cc1)NC(=O)CSc2nnc(n2N)N/N=C/c3ccc(cc3OC)Br                                                                                             |
| 778 | C/C(=N)Nc1nnc(n1N)SCC(=O)Nc2cccc2[N+](=O)[O-]/c3ccc(cc3)Br                                                                                      |
| 779 | CCN(CC)c1ccc(c(c1)O)/C=N/Nc2nnc(n2N)SCC(=O)Nc3nc4cccc4s3                                                                                        |
| 780 | c1ccc(c(c1)CSc2nnc(s2)NC(=O)CSc3nnc(n3N)NN=C4CCCC4)Cl                                                                                           |
| 781 | CC(=O)OC[C@@]12[C@H](C[C@@H](C[C@@]1(CC[C@@H]3[C@@H]2[C@H](C[C@@]4([C@@]3(CC[C@@H]4C(=O)O)O)C)OC(=O)C)O)OC(=O)C)O                               |
| 782 | CC(=O)OC[C@]12[C@H](C[C@@H](C[C@@]1(CC[C@@H]3[C@@H]2[C@H](C[C@@]4([C@@]3(CC[C@@H]4C(=O)O)O)C)OC(=O)C)O)OC(=O)C)O                                |
| 783 | Cc1ccc(o1)[C@H](C(=O)NC[C@H]2CCCO2)N(c3ccc(cc3)C(C)C(=O)c4c(c(ns4)C(=O)N)N                                                                      |
| 784 | CC1=C[C@](N(N1)C(=O)CSc2nnc(s2)SCC(=O)N3[C@@](CC(=C)N3)(c4cccc4)O)(c5cccc5)O                                                                    |
| 785 | c1cc(ccc1c2[nH]c3ccc(cc3n2)NC(=O)CSc4cn[nH]n4)NC(=O)CSc5cn[nH]n5                                                                                |
| 786 | Cc1cc(no1)NS(=O)(=O)c2ccc(cc2)N/N=C(\C#N)/C(=O)Nc3ccc(cc3)S(=O)(=O)N                                                                            |
| 787 | C/C(=C\COC[C@@H]1[C@@H]([C@@H]([C@@H]([C@@H](CO1)OC)O)O)/CC[C@@H]2C(=C)CC[C@@H]3[C@@]2(CC[C@@H](C3(C)C)O[C@@H]4[C@@H]([C@@H]([C@@H](O4)CO)O)O)C |
| 788 | C[C@H]1[C@H]([C@@H](C[C@@H](O1)O)[C@@H]2CC[C@@]3([C@H]4CC[C@@]5([C@@H](CC[C@@]5([C@@H]4CC[C@@]3(C2)O)O)C6=CC(=O)OC6                             |
| 789 | )C)/C=N/CCCO)OC)O                                                                                                                               |
| 790 | CCCCCCCC[C@@H]1[C@H]([C@@H]([C@@H]([C@@H](C(=O)N[C@@H](C(=O)N[C@@H](C(=O)N[C@@H](C(=O)O1)CO)[C@@H](C)O)C(C)C)O)C                                |
| 791 | COc1c/c(=N/S(=O)(=O)c2ccc(cc2)NC(=S)Nc3ccc(cc3)S(=O)(=O)N)/[nH]c(n1)OC                                                                          |
| 792 | COc1cc(cc(c1)OC)NC(=O)c2c(c3c(c(sc3s2)C(=O)Nc4cc(cc(c4)OC)OC)N)N                                                                                |
| 793 | CC1=C([C@@H](C(=C(N1)SCC(=O)Nc2nc3cccc3s2)C#N)c4ccc4)C(=O)Nc5ccc(cc5)S(=O)(=O)N                                                                 |
| 794 | CC1=C([C@@H](C(=C(N1)SCC(=O)NC2CCCC2)C#N)c3ccc3)C(=O)Nc4ccc(cc4)S(=O)(=O)N                                                                      |
| 795 | c1cc(ccc1Cc2ccc(cc2)NC(=O)NNC(=O)c3ccncc3)NC(=O)NNC(=O)c4ccncc4                                                                                 |
| 796 | c1ccc(cc1)NC(=O)C(=O)N/N=C/c2c3cccc3ccc2O                                                                                                       |
| 797 | c1cc(cc(c1)O)N2C(=O)c3ccc(cc3C2=O)Oc4ccc(cc4)N                                                                                                  |
| 798 | c1cc(cc(c1)O)/C=N/NC(=O)c2cc(n[nH]2)c3ccc(cc3)Cl                                                                                                |
| 799 | Cc1ccc(c(c1)C)OCC(=O)NNC(=O)Nc2ccc(cc2)Cl                                                                                                       |
| 800 | Cc1ccc(cc1)NC(=O)Nc2nc(cs2)CC(=O)NC(C)(C)C                                                                                                      |

|     |                                                                               |
|-----|-------------------------------------------------------------------------------|
| 801 | <chem>c1ccc(cc1)Nc2nc(nc(n2)N)/C(=C/c3ccccc3Cl)/C#N</chem>                    |
| 802 | <chem>Cc1cc(ccc1O[C@@H](C)C(=O)Nc2ccc3c(c2)[nH]c(=O)[nH]3)Cl</chem>           |
| 803 | <chem>Cc1ccc(cc1)c2nnc(n2N)SCc3[nH]c4ccccc4n3</chem>                          |
| 804 | <chem>Cc1cc(cc(c1)NC(=O)NNC(=O)c2ccc(cc2)n3ccccc3)C</chem>                    |
| 805 | <chem>c1cc(ccc1CSc2nnc(n2N)NN=C3CCCC3)Cl</chem>                               |
| 806 | <chem>Cc1ccnc(c1)Nc2c(c(ncn2)Oc3cc(cc(c3)C)C)N</chem>                         |
| 807 | <chem>c1ccc2cc(ccc2c1)Oc3c(c(ncn3)NCc4ccco4)N</chem>                          |
| 808 | <chem>CCN(c1ccccc1)c2c(c(ncn2)Nc3ccc(cn3)C)N</chem>                           |
| 809 | <chem>Cc1ccc2c1nc(s2)Nc3c(c(ncn3)N4CCCC4)N</chem>                             |
| 810 | <chem>Cc1ccc2cccc(c2n1)Nc3c(c(ncn3)N4CCCC[C@@H]4C)N</chem>                    |
| 811 | <chem>CC[C@H]1CCCN1c2c(c(ncn2)Nc3nc(c(s3)C)C)N</chem>                         |
| 812 | <chem>c1cc2ccnc2c(c1)Oc3c(c(ncn3)NC4CCCCC4)N</chem>                           |
| 813 | <chem>Cc1ccc(c(c1)C)Nc2c(c(ncn2)n3cnc4c3ccccc4)N</chem>                       |
| 814 | <chem>Cc1ccc2cccc(c2n1)Nc3c(c(ncn3)Oc4ccccc4)N</chem>                         |
| 815 | <chem>c1ccc2c(c1)ncn2c3c(c(ncn3)Nc4ccc(cc4)Cl)N</chem>                        |
| 816 | <chem>c1ccc2c(c1)CCCN2c3c(c(ncn3)Nc4nccs4)N</chem>                            |
| 817 | <chem>c1ccc2c(c1)CCCN2c3c(c(ncn3)Nc4ccccc4)N</chem>                           |
| 818 | <chem>Cc1ccc(cc1)Oc2c(c(ncn2)Nc3cccnc3Cl)N</chem>                             |
| 819 | <chem>CCNc1c2ccccc2nc(n1)Nc3ccc(cc3)NC(=O)C</chem>                            |
| 820 | <chem>C[C@@H]1CCCC[C@H]1NC(=O)Nc2ccc(cc2)NC(=O)c3ccco3</chem>                 |
| 821 | <chem>Cc1ccc(cc1)[C@H]2C[C@@H](n3c(nc(n3)N)N2)c4ccc(cc4)OC</chem>             |
| 822 | <chem>C[C@H]1C(=C(NN1C(C)(C)C)C)[C@@H]2[NH+]c3ccc(cc3=[NH+]2)C(=O)[O-]</chem> |
| 823 | <chem>Cc1ccc(cc1)Nc2c(n[nH]n2)C(=O)Nc3c(cccc3C)C</chem>                       |
| 824 | <chem>Cc1ccc(c1)Oc2c(cccn2)CNc3cc(nc(n3)N)C)C</chem>                          |
| 825 | <chem>C[C@H](c1ccc(s1)Cl)NC(=O)Nc2ccc3c(c2)C(=O)NC3=O</chem>                  |
| 826 | <chem>Cc1c(c(n[nH]1)O)CCC(=O)N/N=C\c2ccc(c(c2)Cl)Cl</chem>                    |
| 827 | <chem>COc1ccc(cn1)c2cc(c(c(n2)N)C#N)c3ccc4c(c3)cc[nH]4</chem>                 |
| 828 | <chem>Cc1c(c(on1)C)[C@@H](C)NC(=O)NNc2ccc(cc2Cl)Cl</chem>                     |
| 829 | <chem>Cc1cc(nc(n1)c2ccccc2O)N/N=C\c3ccccc3O</chem>                            |
| 830 | <chem>Cc1cc(nc(n1)SCc2cc(=O)oc3c2ccc(c3C)O)N</chem>                           |
| 831 | <chem>CC(C)c1ccc(cc1)S(=O)(=O)Nc2ccc3c(c2)[nH]c(=O)[nH]3</chem>               |
| 832 | <chem>Cc1csc2c1c(=O)[nH]c(n2)c3ccccc3)NC(=O)NC(C)C</chem>                     |
| 833 | <chem>CC(C)(C)c1cs/c(=N\S(=O)(=O)c2cc(c(nc2)N)Cl)/[nH]1</chem>                |
| 834 | <chem>c1cc(cnc1)c2c(c[nH]2)CNc3cc([nH]n3)C4CCCCC4</chem>                      |
| 835 | <chem>c1ccc(cc1)NC(=O)Nc2ccc(cc2)c3ccnc4c3cn[nH]4</chem>                      |
| 836 | <chem>Cc1ccc(cc1)NC(=O)NCc2cc3ccccc3[nH]2)c4ncco4</chem>                      |
| 837 | <chem>c1ccc2c(c1)c(ccn2)NNC(=O)c3cc(n[nH]3)C4CCCC4</chem>                     |
| 837 | <chem>Cc1cc(c2cc([nH]c2c1)C(=O)NNc3cc(cc(n3)Cl)C#N)C</chem>                   |

|     |                                                                     |
|-----|---------------------------------------------------------------------|
| 838 | CC(C)(C)c1c(sc1)NC(=O)Nc2ccc3c(c2)CC(=O)N3                          |
| 839 | c1ccc2c(c1)c(nc(n2)c3ccco3)Nc4ccc(cc4)C(=O)N                        |
| 840 | c1ccc2c(c1)ccc(c2/C=N\NC(=O)c3c4c([nH]n3)CCC4)O                     |
| 841 | c1ccc(cc1)Nc2nc(nc(n2)N)/C(=C\c3cccc(c3)F)/C#N                      |
| 842 | Cc1cccc2c1oc(c2C)C(=O)Nc3c4cccc4oc3C(=O)N                           |
| 843 | Cc1ccc(cc1F)Cc2cnc(s2)NC(=O)Nc3c[nH]nc3                             |
| 844 | CCNc1c(c(nc(n1)N)Cl)/N=N/c2ccc(cc2)Cl                               |
| 845 | CCOc1ccc(cc1)S(=O)(=O)NCCC(=O)OCC(=O)Nc2c(c(c(n2)Cl)C)Cl            |
| 846 | COc1cc(cc(c1OC)OC)/C=C/C(=O)Nc2nnc(s2)SCC(=O)NC[C@H]3CCCO3          |
| 847 | C=CCN(c1cccc1)S(=O)(=O)c2cccc(c2)C(=O)OCC(=O)NC(=O)NCC3ccco3        |
| 848 | CCSc1nc(c2cnn(c2n1)CCNC(=O)c3cc(c(c3)OC)OC)OC)NC(C)C                |
| 849 | CCSc1nc(c2cnn(c2n1)CCNC(=O)COc3ccc(cc3)Cl)NCCOC                     |
| 850 | CCSc1nc(c2cnn(c2n1)CCNC(=O)[C@H]3CC(=O)N(C3)c4ccc(cc4)C)NCCOC       |
| 851 | CCOC(=O)Cc1csc(n1)NC(=O)CSc2c3c(n(c=O)n2)CCCO)CCCC3                 |
| 852 | COCCN1c(nnc1SCCC(=O)NC(=O)NCc2cccc2)c3cccc3Cl                       |
| 853 | CCOc1ccc(cc1)NC(=O)CSc2nnc(o2)CNC(=O)COc3ccc(cc3)Cl                 |
| 854 | CNC(=O)c1c2c(sc1NC(=O)c3ccc(cc3)S(=O)(=O)N(CCOC)CCOC)CCCC2          |
| 855 | CCOc1ccc(cc1)NC(=S)N(Cc2ccco2)Cc3cc4cc(c(cc4[nH]c3=O)OC)OC          |
| 856 | COCCNC(=O)c1c2c(sc1NC(=O)COC(=O)COc3ccc4cccc4c3)CCCC2               |
| 857 | CCCOc1ccc(cc1C(=O)NC(=S)N2CCNC(=O)[C@@H]2CC(=O)OCC)Br               |
| 858 | CCCCOC(=O)C[C@H]1C(=O)NCCN1C(=S)NC(=O)c2cc(ccc2OCC)Br               |
| 859 | CSCCCNc1cc(cc1)S(=O)(=O)N2CCCC2)C(=O)NCCN3ccnc3                     |
| 860 | CCCCOC(=O)C[C@H]1C(=O)NCCN1C(=S)NC(=O)c2ccc(c(c2)Br)OC(C)C          |
| 861 | CCCCOC(=O)C[C@H]1C(=O)NCCN1C(=S)NC(=O)c2cccc2OCCOC                  |
| 862 | CC(C)n1cc(c1)/C=N/NC(=O)CSc2nnc(n2CC=C)CNc3ccc(cc3)Cl               |
| 863 | CCCCC1c1nc2c(c(n1)S[C@@H](C)C(=O)NC(=O)NC3CC3)c(=O)n(c(=O)n2CCC)C   |
| 864 | CCOc1ccc(cc1OCC)C(=O)NCC(=O)O[C@H](C)C(=O)Nc2ccc(cc2)C(F)(F)F       |
| 865 | CN(CCc1nc(on1)c2ccc(cc2)C(=O)NCCOC)C(=O)Nc3cccc3OC                  |
| 866 | CCN(Cc1[nH]c(=O)c2cc(c(cc2n1)OC)OC)CC(=O)NCCc3cccc3OC(F)(F)F        |
| 867 | CCOCCOc1nc(n1)c2cccc(c2)NC[C@@H](COC(C)C)O)c3ccc(cc3)OC             |
| 868 | CCOC(=O)c1c(c2c(nc(nc2s1)C[NH+](CCCOC)C[C@@H](COC(C)C)O)[O-])C      |
| 869 | CC(C)C[NH+](Cc1nc(c2c(csc2n1)c3ccc(c(c3)OC)OC)[O-])C[C@H](COC(C)C)O |
| 870 | CC(C)[NH+](Cc1nc(c2c(csc2n1)c3ccc(c(c3)OC)OC)[O-])C[C@@H](COCC#C)O  |
| 871 | CC(C)[NH+](Cc1nc(c2c(csc2n1)c3ccc(c(c3)OC)OC)[O-])C[C@H](COCC#C)O   |
| 872 | COc1ccc(cc1OC)c2csc3c2c(=O)[nH]c(n3)CN(C[C@H](COc4cccc4)O)C5CC5     |
| 873 | COc1ccc(cc1)Nc2nc(cs2)C(=O)N(CCC(=O)NC[C@@H]3CCCO3)Cc4ccco4         |
| 874 | COCCNC(=O)CCN(Cc1ccco1)C(=O)c2csc(n2)Nc3cccc(c3)Cl)Cl               |
| 874 | CCC(=O)Nc1ccc(cc1OCC)C(=O)CSc2nnc(o2)CNc3ccc(cc3)Cl                 |

|     |                                                                                               |
|-----|-----------------------------------------------------------------------------------------------|
| 875 | <chem>C[C@@H](c1nnc(n1CC=C)SCC(=O)Nc2cccc(c2)C(=O)OC)NC(=O)c3cccs3</chem>                     |
| 876 | <chem>Cc1ccc(cc1)N([C@H](c2ccc(cc2)F)C(=O)NCCOC)C(=O)CCC(=O)Nc3nccs3</chem>                   |
| 877 | <chem>CCOc1ccc(cc1OCC)C(=O)NCCn2c3c(cn2)c(ncn3)NCc4ccc(cc4)F</chem>                           |
| 878 | <chem>CCCNC(=O)CSc1nnc(s1)NC(=O)c2c(cn(n2)c3ccc(cc3)F)OCCC</chem>                             |
| 879 | <chem>Cc1cccc(c1)N2CCN(CC2)CCCCNC(=O)c3c(c(c([nH]3)C)C(=O)OCCOC)C</chem>                      |
| 880 | <chem>CCCC(=O)Nc1ccc(c(c1)C(=O)C)OCC(=O)NCc2cccc2S(=O)(=O)N(C)C</chem>                        |
| 881 | <chem>CCOc1ccc(cc1)[C@H](CCC(=O)N/N=C\c2ccc(c(c2)Br)OCC(=O)OC)O</chem>                        |
| 882 | <chem>Cc1ccc(cc1)C(=O)NCCc2nnc(n2CC=C)SCC(=O)Nc3ccc(cc3)OC</chem>                             |
| 883 | <chem>CC[C@H](C)Sc1nnc(s1)NC(=O)CSc2nnc(n2CC=C)CNC3cccc3</chem>                               |
| 884 | <chem>CCN(CC)C(=O)c1c(c(c(s1)NC(=S)Nc2nnc(n2)Cc3cccc3C)C(=O)OC)C</chem>                       |
| 885 | <chem>CCN(CC)S(=O)(=O)c1ccc(c(c1)/N=C(/C[NH+](C)CC(=O)Nc2ccc(cc2)OC)\[O-])C</chem>            |
| 886 | <chem>CCOc1ccc(cc1OCC)S(=O)(=O)N2CCN(CC2)CCOc3ccc(cc3)S(=O)(=O)N</chem>                       |
| 887 | <chem>CCn1c(c(c(n1)C)CN/C(=N)C(=O)c2cc(c(c2)OC)OC)OC)/Nc3ccc(cc3)OC)C</chem>                  |
| 888 | <chem>CC[NH+](CC)CCCN1[C@H](C(=C(C1=O)[O-])C(=O)c2c(c([nH]c2C)C(=O)OC)C)c3cccc3F</chem>       |
| 889 | <chem>CCOc1ccc(cc1)[C@@H]2C(=C(C(=O)N2CCCN3cc[nH+]c3)[O-])C(=O)c4c(c([nH]c4C)C(=O)OC)C</chem> |
| 890 | <chem>CCCN(CCC)C(=O)CCC(=O)Nc1ccc(c(c1)Cl)NC(=O)[C@@H](C)n2c(cc(n2)C)C</chem>                 |
| 891 | <chem>Cc1cccc1OC[C@@H](CN(CCOC)Cc2[nH]c(=O)c3c(c(sc3n2)C(=O)OC)C)O</chem>                     |
| 892 | <chem>COc1cccc1c2csc3c2c(=O)[nH]c(n3)CN(Cc4cccc4)C[C@H](COCC=C)O</chem>                       |
| 893 | <chem>CCCC(=O)OC[C@H](CN(CC=C)Cc1[nH]c(=O)c2c(c(sc2n1)C(=O)OC(C)C)C)O</chem>                  |
| 894 | <chem>CCCCC(=O)NC(C(F)(F)F)(C(F)(F)F)Nc1ccc(cc1)S(=O)(=O)Nc2c(con2)C</chem>                   |
| 895 | <chem>CCOc1ccc(cc1OCC)C(=O)Nc2nnc(s2)SCC(=O)Nc3cccc(c3)NC(=O)C</chem>                         |
| 896 | <chem>CCOCCOc1ccc(cc1)C(=O)NC(=S)Nc2cccc2C(=O)Nc3ccc(c(c3)C)C</chem>                          |
| 897 | <chem>CCOc1ccc(cc1)NS(=O)(=O)c2ccc(cc2)NC(=S)NC(=O)COc3cccc(c3)C</chem>                       |
| 898 | <chem>c1ccc2c(c1)cccc2OCC(=O)NNC(=S)NC(=O)CCCOc3ccc(cc3Cl)Cl</chem>                           |
| 899 | <chem>Cc1cccc(c1)c2nnc(n2CC(=O)N)SCC(=O)NCCC(c3cccc3)c4cccc4</chem>                           |
| 900 | <chem>CC(C)Oc1ccc(cc1Br)C(=O)NC(=S)Nc2cccc2C(=O)NCCOC</chem>                                  |
| 901 | <chem>CCOCCOc1ccc(cc1)C(=O)NC(=S)Nc2cccc(c2)C(=O)Nc3cccc(c3)Cl</chem>                         |
| 902 | <chem>CC(C)(C)c1ccc(cc1)C(=O)Nc2ccc(cc2)NC(=S)NC(=O)c3ccc(cc3)OCCOC</chem>                    |
| 903 | <chem>CCCOc1ccc(cc1)C(=O)NC(=S)NNC(=O)COc2ccc(cc2Br)CC</chem>                                 |
| 904 | <chem>CC(C)CCOc1ccc(cc1)C(=O)NC(=S)NNC(=O)COc2ccc(cc2)Br</chem>                               |
| 905 | <chem>CCOc1cc(cc(c1OCC)OCC)C(=O)NC(=S)Nc2ccc(cc2)Cc3c([nH]nc3C)C</chem>                       |
| 906 | <chem>CCCCOc1ccc(cc1C(=O)NC(=S)NNC(=O)COc2cccc2C)Br</chem>                                    |
| 907 | <chem>CCCNC(=O)c1cccc1NC(=S)NC(=O)c2cc(ccc2OCCOC)Br</chem>                                    |
| 908 | <chem>CCCC(=O)Nc1ccc(cc1)C(=O)NNC(=O)COc2ccc(cc2Br)[C@H](C)CC</chem>                          |
| 909 | <chem>CCOc1cc(cc(c1OCC)OCC)C(=O)NC(=S)Nc2ccc(cc2)NC(=O)c3cccc3</chem>                         |
| 910 | <chem>CCCC(=O)Nc1ccc(cc1)C(=O)Nc2nnc(s2)CCNS(=O)(=O)c3ccc(cc3)C</chem>                        |
| 911 | <chem>CCCN1c(c(c(=O)[nH]c1=O)N(CCOC)C(=O)COC(=O)c2cc(cnc2)Br)N</chem>                         |

|     |                                                                                                                    |
|-----|--------------------------------------------------------------------------------------------------------------------|
| 912 | CCCN(CCC)Cc1c(nnn1c2c(non2)N)C(=O)N/N=C/c3ccc(cc3[O-])N(CC)CC                                                      |
| 913 | c1cc(ccc1COc2ccc(o2)/C=N/Nc3[nH]nc(n3)SCC(=O)Nc4ccc(cc4)[N+](=O)[O-])F                                             |
| 914 | C=CCn1c(nnc1SCC(=O)Nc2nnc(s2)SCC(=O)N)Cn3c4cccc4nn3                                                                |
| 915 | COC(=O)c1ccc(cc1)/C=N/Nc2[nH]nc(n2)SCCC(=O)Nc3ccc(cc3)C(F)(F)F                                                     |
| 916 | CCCCSc1cccc1NC(=O)CSc2nc([nH]n2)N/N=C/c3c4cccc4ccc3O                                                               |
| 917 | CC[C@H](C)Sc1nnc(s1)/N=C(/CSc2nnc(n2N)N/N=C/c3c(nn(c3C)C(C)C)C)\[O-]                                               |
| 918 | CCCCSc1nnc(s1)/N=C(/CSc2nnc(n2N)N/N=C/c3cnn(c3)C(C)C)\[O-]                                                         |
| 919 | CN(C)c1ccc(cc1)/C=N/Nc2[nH]nc(n2)SCC(=O)Nc3nnc(s3)SCCOC                                                            |
| 920 | CCCCOc1cccc(c1)NC(=O)CSc2nc([nH]n2)N/N=C/c3cccc(c3Cl)Cl                                                            |
| 921 | CC[C@H](C)Sc1nnc(s1)/N=C(/CSc2nc([nH]n2)N/N=C/c3cccc(c3O)OC)\[O-]                                                  |
| 922 | CCNS(=O)(=O)c1ccc(cc1)NC(=O)CSc2nc([nH]n2)N/N=C/c3cc(ccc3[O-])OC                                                   |
| 923 | CC(C)OC(=O)c1c2c(sc1NC(=O)CSc3nnc(n3CCC(=O)N)C4CC4)CCCC2                                                           |
| 924 | CCCc1ccc(cc1)c2csc(n2)NC(=O)CSc3nnc(n3CCC(=O)N)c4ccc4                                                              |
| 925 | CCc1cccc1Nc2nc(nc(n2)N)CSc3nnc(n3CC=C)COc4cccc4F                                                                   |
| 926 | CCCN(CCC)S(=O)(=O)c1ccc2c(c1)c(c[nH]2)/C=N/NC(=S)Nc3cccc(c3C)Cl                                                    |
| 927 | Cc1cc(ccc1C(=O)C2=C(C(=O)N([C@H]2c3ccc(cc3)OCC(=O)N)CC[NH+](C)C)[O-])OCC=C                                         |
| 928 | CC(=O)c1ccc(cc1)NC(=S)N[C@@H](C(Cl)(Cl)Cl)NC(=O)COc2ccc(cc2)OC                                                     |
| 929 | CCCCOc1cccc1C(=O)NC(=S)NNC(=O)c2ccc(cc2)NC(=O)c3cccc3                                                              |
| 930 | Cc1ccc2c(c1)occ2CC(=O)OCC(=O)N(CCOC)c3c(n(c(=O)[nH]c3=O)Cc4cccc4)N                                                 |
| 931 | C[C@]12C[C@H]([C@@H]3[C@H]([C@@H]1CC[C@]2(C(=O)COC(=O)CCC(=O)N[C@@H](CC(=O)O)C(=O)[O-])O)CCC4=CC(=O)C=C[C@]34C)O   |
| 932 | CCOc1ccc(cc1)NC[C@H](COc2ccc(cc2)OC[C@H](CNc3ccc(cc3)OCC)O)O                                                       |
| 933 | Cc1cc(no1)[N-]S(=O)(=O)c2ccc(cc2)NC(=O)CSc3nnc(n3CC=C)Cc4csc(n4)N                                                  |
| 934 | CCOc1cc(ccc1O)/C=N/Nc2[nH]nc(n2)SCC(=O)Nc3cccc(c3)C(F)(F)F                                                         |
| 935 | CC(C)(CNC(=S)Nc1ccc(cc1OC)OC)CNC(=S)Nc2ccc(cc2OC)OC                                                                |
| 936 | Cc1c(c(sc1C(=O)N)NC(=O)CSc2nnc(n2CC=C)c3cccc(c3)N(C)C)C(=O)OC                                                      |
| 937 | c1cc(ccc1NC(=S)Nc2cc(cc(c2)OCC(F)(F)F)OCC(F)(F)F)S(=O)(=O)N                                                        |
| 938 | CCc1cc(c(s1)NC(=S)Nc2cccc(cc2)S(=O)(=O)Nc3cc(ncn3)OC)C(=O)OC                                                       |
| 939 | COc1ccc(c(c1)/C=N/Nc2[nH]nc(n2)SCC(=O)Nc3nnc(s3)SCC=C)OC                                                           |
| 940 | CCCC/C=C\C/C=C\C=C\C=C\C[C@@H]([C@H](CCCC(=O)[O-])O)SC[C@@H](C(=O)NCC(=O)[O-])[NH3+]                               |
| 941 | c1cc(ccc1c2ccc([n+](n2)CCCC(=O)[O-])N)NC(=S)Nc3ccc(c(c3)C(=O)[O-])c4c5ccc(cc5oc-6cc(=O)ccc46)O                     |
| 942 | CCN(CC)c1ccc(cc1)CNC(=O)/C=C\C)/NNC(=O)COc2ccc(cc2C)Br                                                             |
| 943 | c1cc-2c(cc1S(=O)(=O)N(CCO)CCO)C(=C(C#N)C#N)c3c2ccc(c3)S(=O)(=O)N(CCO)CCO                                           |
| 944 | CC(C)Oc1ccc(cc1)[C@]2(C(=O)N(C(=O)N2)CCCCCN3C(=O)[C@](NC3=O)(C)c4ccc(cc4)OC(C)C)C                                  |
| 945 | CC1=NC(=C)C([C@@H](C1C(=O)OCC[NH+](C)C)c2cccc2[N+](=O)[O-])C(=O)OCCNC(=O)c3cccc3O                                  |
| 946 | CCOC(=O)Oc1c(cc(cc1OC)C(=O)O[C@H]2C[C@@H]3C[NH+][4CCc5c6ccc(cc6[nH]c5[C@@H]4C[C@@H]3[C@@H]([C@@H]2OC)C(=O)OC)OC)OC |
| 947 | CC1(C(=O)N(C(=O)N1CN2C(=O)N(C(=O)C2(C)C)C[C@@H](CNc3cccc3)O)C[C@@H](CNc4cccc4)O)C                                  |
| 948 | CC[NH+](CC)CCOC(=O)c1ccc(cc1)NC(=O)CCCN2C(=O)/C(=C/c3ccc(cc3)OC)/SC2=S                                             |
| 948 | CC(=O)C(=C1NC(=C(C(=O)C)C(=O)OC(C)(C)C)NC(=C(C(=O)C)C(=O)OC(C)(C)C)N1)C(=O)OC(C)(C)C                               |

|     |                                                                                                                                                                               |
|-----|-------------------------------------------------------------------------------------------------------------------------------------------------------------------------------|
| 949 | <chem>Cc1cc(n[nH]1)NC(=O)CSc2nc3ccsc3c(=O)n2CCCC(=O)NCCc4ccc(cc4)S(=O)(=O)N</chem>                                                                                            |
| 950 | <chem>CCCC[NH+](C)CCCN1[C@H]([C@@]23C=C[C@@H](O2)[C@H]([C@@H]3C1=O)C(=O)Nc4cccc(c4)OC)C(=O)N[C@@H]5CCCC[C@@H]5C</chem>                                                        |
| 951 | <chem>COCCNC(=O)c1ccc2c(c1)nc(n(c2=O)Cc3ccco3)SCC(=O)Nc4ccc(cc4OC)OC</chem>                                                                                                   |
| 952 | <chem>c1cc[nH+]c(c1)N2CC[NH+](CC2)C[C@H](COc3ccc(cc3)OC)[C@@H](CN4CCN(CC4)c5cccc[nH+]5)O)O</chem>                                                                             |
| 953 | <chem>Cc1ccc2cc(c(=O)[nH]c2c1C)C[NH+](CCc3ccc(c(c3)OC)OC)Cc4nnnn4CCc5ccccc5</chem>                                                                                            |
| 954 | <chem>Cc1nc(c(cn1)CN(/C(=C/SS/C(=C/N(C=O)Cc2c(nc(nc2)C)N)\C)/CCO)\CCO)/C)C=O)N</chem>                                                                                         |
| 955 | <chem>CCOc1cccc1N(CC(=O)Nc2ccccc2C(=O)NCCOC)S(=O)(=O)c3ccc(cc3)SC</chem>                                                                                                      |
| 956 | <chem>CCCN(CCC)S(=O)(=O)c1ccc(cc1)C(=O)Nc2ccc(cc2)S(=O)(=O)Nc3cc(ncn3)OC</chem>                                                                                               |
| 957 | <chem>CCOC(=O)C1=C(NC(=C([C@H]1c2ccccc2Cl)C(=O)OC)C)COCCNC(=O)c3ccccc3C(=O)[O-]</chem>                                                                                        |
| 958 | <chem>c1ccc(c(c1)C(=O)N[C@@H]2C=C(C[C@H]([C@@H]2OC(=O)NCCCl)OC(=O)NCCCl)C(=O)NCC(=O)N)Br</chem>                                                                               |
| 959 | <chem>CC[C@H](C)/C=C(C)/C=C/C1=CC2=C(C(=O)[C@H]([C@@H](C=O)C2=CN1[C@H](CCNC(=[NH2+])N)C(=O)[O-])(C)OC(=O)C)Cl</chem>                                                          |
| 960 | <chem>CCO[C@@H](C)SCC(=O)NC[C@H](CCC(=O)O)c1c(c(cc(c1F)F)F)NC(=O)CS[C@H](C)OCC</chem>                                                                                         |
| 961 | <chem>C/C=C(C[C@H](N(Cc1cnc(nc1N)C)C=O)O)/SS/C(=C\C)/C[C@H](N(Cc2cnc(nc2N)C)C=O)O</chem>                                                                                      |
| 962 | <chem>C/C=C/C[C@H](N(Cc1c[nH+]c(nc1N)C)C=O)O)\SS/C(=C/C)/C[C@H](N(Cc2cnc(nc2N)C)C=O)O</chem>                                                                                  |
| 963 | <chem>CC[NH+](CC)c1ccc2c(c1)oc-3cc(=[NH+](CC)CC)ccc3c2c4ccc(cc4S(=O)(=O)[O-])S(=O)(=O)NCCSS(=O)(=O)C</chem>                                                                   |
| 964 | <chem>Cn1c2ccc(cc2nc1CNc3ccc(cc3)C(=[NH2+])N)C(=O)N(CCC(=O)O)[C@H]4[C@@H]([C@H]([C@H](O4)C(=O)[O-])O)O)c5ccccc5</chem>                                                        |
| 965 | <chem>CCCc1c2c(c(=O)[nH]c(n2)c3cc(ccc3OCC)S(=O)(=O)c4ccc(c(c4)c5[nH]c(=O)c6c(n5)c(nn6C)CCC)OCC)n(n1)C</chem>                                                                  |
| 966 | <chem>CC(=O)O[C@@H]1[C@H]([C@H]([C@@H]([C@H]([C@H]1OC(=O)C)Oc2ccc3c(c2)CCc4ccccc4N3CCC[NH2+]C)C(=O)OC)OC(=O)C</chem>                                                          |
| 967 | <chem>CC(=O)OC[C@@H]1[C@H]([C@H]([C@H]([C@H]([C@H]([C@H]1O)O[C@H]2[C@@H]([C@H]([C@H]([C@H]([C@H]2OCC=C)OC)CO)O)OC(=O)C)OC(=O)C)OC(=O)C</chem>                                 |
| 968 | <chem>CCCCCCCCC/[NH+]=C/[C@]12CC[C@@H](C[C@]1(C[C@H]3[C@@H]2CC[C@]4([C@]3(CC[C@H]4C5=CC(=O)OC5)O)C)O)O[C@H]6C[C@@H]([C@H]1C)[C@@H]([C@H](O6)C)O)O</chem>                      |
| 969 | <chem>C[C@H]1C[C@]([C@@H](C[NH+]1C)C)(CCNC(=O)CCC(=O)OCC(=O)[C@]2(CC[C@@H]3[C@@]2(C[C@@H]([C@H]4[C@H]3CCC5=CC(=O)CC[C@]45C)O)C)O)c6ccc(cc6)OC</chem>                          |
| 970 | <chem>O)C)O)c6ccc(cc6)OC</chem>                                                                                                                                               |
| 971 | <chem>Cc1c(c(c2c(c1OC(=O)C)C3=C(OCOC3=C(C2=O)C)/C(=C/C(=O)C)/C)O)NC(=O)/C(=C/C=C\C[C@H](C)[C@H]([C@@H](C)[C@@H]4[C@@H]([C@@H]([C@@H]([C@H]([C@H](O4)O)C)O)C(=O)OC)O)/C</chem> |
| 972 | <chem>Cc1c(c(sc1C(=O)OC)NC(=O)CCCC(=O)Nc2c(c(c(s2)C(=O)OC)C)C(=O)OC)C(=O)OC</chem>                                                                                            |
| 973 | <chem>CC[C@H](C)c1ccc(cc1)NC(=S)NNC(=O)CCCC(=O)NNC(=S)Nc2ccc(cc2)[C@@H](C)CC</chem>                                                                                           |
| 974 | <chem>Cc1c(c(sc1C(=O)OC(C)C)NC(=O)CCSCCC(=O)Nc2c(c(c(s2)C(=O)OC(C)C)C)C#N)C#N</chem>                                                                                          |
| 975 | <chem>CCOc1cc(ccc1OCC=C)[C@@H]2C(=C(C(=O)N2CCCN3cc[nH+]c3)O)C(=O)c4ccc5c(c4)OCCO5</chem>                                                                                      |
| 976 | <chem>CCCN(CCC)S(=O)(=O)c1ccc(cc1)C(=O)Nc2ccc(cc2)S(=O)(=O)/N=C\3/cc(nc([nH]3)OC)OC</chem>                                                                                    |
| 977 | <chem>CC1(Cc2c(c(sc2C(N1)(C)C)NC(=O)c3ccc(cc3)S(=O)(=O)N(CCOC)CCOC)C(=O)OC)C</chem>                                                                                           |
| 978 | <chem>CC[NH+](CC)Cc1c(nnn1c2c(non2)N)C(=O)N/N=C/c3cc(c(c(c3)Br)OCc4ccccc4C)OC</chem>                                                                                          |
| 979 | <chem>CCN(CC)Cc1c(nnn1c2c(non2)N)C(=O)N/N=C/c3ccc(c(c3)OC)OC(=O)c4ccc(cc4)Cl</chem>                                                                                           |
| 980 | <chem>CC(C)CCOc1ccc(cc1OC)[C@H]2C(=C(C(=O)N2CCCN3cc[nH+]c3)O)C(=O)c4ccc5c(c4)OCCO5</chem>                                                                                     |
| 981 | <chem>COc1ccc2c(c1)/C(=N\NC(=O)CCCCCCCC(=O)N/N=C\3/c4cc(ccc4NC3=O)OC)/C(=O)N2</chem>                                                                                          |
| 982 | <chem>CCN(CC)S(=O)(=O)c1ccc(cc1)C(=O)NCc2nnc(n2c3cc(ccc3OC)OC)SCC(=O)Nc4ccc(cc4)OC</chem>                                                                                     |
| 983 | <chem>c1cc[nH+]c(c1)N2CCN(CC2)C[C@H](COc3ccc(cc3)OC)[C@@H](CN4CCN(CC4)c5ccccc5)O)O</chem>                                                                                     |
| 984 |                                                                                                                                                                               |
| 985 |                                                                                                                                                                               |



|      |                                                                                                                                                                   |
|------|-------------------------------------------------------------------------------------------------------------------------------------------------------------------|
| 986  | c1cnc(nc1)N2CC[NH+](CC2)C[C@H](COc3ccc(cc3)OC[C@H](CN4CCN(CC4)c5ncccc5)O)O                                                                                        |
| 987  | CCOc1ccc(cc1)n2c(nnc2SCC(=O)Nc3nccs3)CNC(=O)c4cc(c(c4)OC)OC)OC                                                                                                    |
| 988  | CCCCCCCCCCCCCN(C)S(=O)(=O)c1cccc(c1)S(=O)(=O)NNc2[n+](c3cc(ccc3s2)S(=O)(=O)[O-])C                                                                                 |
| 989  | C[C@H](COc1ccc(cc1)C(C)(C)c2ccc(cc2)OC[C@H](C)OC[C@H](COC(=O)C=C)O)OC[C@H](COC(=O)C=C)O                                                                           |
| 990  | CC(=O)OC[C@H]([C@H]1(CC[C@H]2[C@@H]1(CC(=O)[C@@H]3[C@@H]2CC[C@@H]4[C@@H]3(CC[C@H](C4)O[C@H]5[C@@H]([C@H]([C@@H]([C@@H](O5)C(=O)OC)OC(=O)C)OC(=O)C)OC(=O)C)C)C)O)O |
| 991  | CCOC(=O)CNC(=O)CCCCSc1c2c([n-]cn2)nc(n1)SCCCCC(=O)NCC(=O)OCC                                                                                                      |
| 992  | Cc1c(sc1)/C=C/C2=C(N3[C@H]([C@H](C3=O)NC(=O)/C(=N/OC)/c4csc(n4)N)SC2)C(=O)OCOC(=O)C(C)(C)C                                                                        |
| 993  | Cc1c(cccc1NC(=O)CCC(=O)N/N=C/c2ccc(cc2)/C=N/NC(=O)CCC(=O)Nc3c(c(ccc3)Cl)C)Cl                                                                                      |
| 994  | CCOCCCN([C@H](c1ccc(c(c1)OC)OC)C(=O)NC(C)(C)C)C(=O)c2c(c(ns2)C(=O)N)N                                                                                             |
| 995  | CCOC(=O)c1c(c(sc1NC(=O)CSc2nnc(s2)NC(=O)CC(C)C)C(=O)OCC)C                                                                                                         |
| 996  | CC[NH+](CC)CCOC(=O)c1ccc(cc1)NC(=O)CCN2C(=O)/C(=C\c3ccc(cc3)OC)/SC2=O                                                                                             |
| 997  | CCOc1cc(cc(c1OCC)OCC)C(=O)Nc2nnc(s2)SCC(=O)Nc3cccc(c3)C                                                                                                           |
| 998  | CCOCCOc1ccc(cc1)C(=O)NC(=S)NNC(=O)COc2ccc(cc2Br)C                                                                                                                 |
| 999  | CCCCNC(=O)c1cccc1NC(=O)c2ccc(cc2)C(=O)Nc3cccc3C(=O)NCCCC                                                                                                          |
| 1000 | CC(=O)NCCOc1ccc(cc1OCCNC(=O)C)NS(=O)(=O)c2ccc(cc2)N3CCCC3=O                                                                                                       |
| 1001 | CCC(C)(C)NC(=O)[C@@H](c1ccc(cc1)OC)N(CCCOC)C(=O)CCC(=O)Nc2cc(on2)C                                                                                                |
| 1002 | CC[C@H](c1nnnn1CC(=O)OCC)[NH+](Cc2ccc(cc2)OC)Cc3cc4ccc(c(c4[nH]c3=O)C)C                                                                                           |
| 1003 | CC[C@H](c1nnnn1CC(=O)OCC)[NH+](Cc2cccc2OC)Cc3cc4c(ccc(c4[nH]c3=O)C)C                                                                                              |
| 1004 | COC(=O)Cn1c(=O)c(c(n1=O)Cc2cccc2)N)C(=O)COC(=O)CCC(=O)c3cccc3                                                                                                     |
| 1005 | CC[NH+](CC)CCN1[C@H]([C@@H](C(=O)C1=O)C(=O)c2c(c([nH]c2C)C(=O)OC)C)c3ccc(cc3)C(=O)OC                                                                              |
| 1006 | CCOCCOc1cccc(c1)C(=O)NC(=S)Nc2ccc(cc2)S(=O)(=O)N(C)c3cccc3                                                                                                        |
| 1007 | CCN(CC)S(=O)(=O)c1ccc2c(c1)nc(n2)CCC(=O)OCC(=O)NC(=O)NCCC(C)C                                                                                                     |
| 1008 | CCCOC(=O)c1ccc(cc1)OCC(=O)NNC(=O)c2ccc(c(c2)Br)OCC(C)C                                                                                                            |
| 1009 | CCCOC(=O)C[C@H]1C(=O)NCCN1C(=S)NC(=O)c2cc(ccc2OCCOC)Br                                                                                                            |
| 1010 | CC[NH+](CC)CCCN1[C@H](/C(=C(/c2ccc(cc2)OC(C)C)\O)/C(=O)C1=O)c3ccc(c(c3)OC)OCC                                                                                     |
| 1011 | COc1ccc(cc1)COc2ccc(o2)/C=N/Nc3[nH]nc(n3)SCC(=O)Nc4cccc(c4)OC                                                                                                     |
| 1012 | COc1cc(cc(c1)OC)NC(=O)CSc2nnc(n2N)N/N=C/c3cc(c(c3)OC)OC)OC                                                                                                        |
| 1013 | Cc1c(c(n1)C(C)C)/C=N/Nc2[nH]nc(n2)SCC(=O)Nc3nnc(s3)SCCOC                                                                                                          |
| 1014 | COc1cc(cc(c1)OC)NC(=O)CSc2nc([nH]n2)N/N=C/c3cc(c(c3)OC)OC)OC                                                                                                      |
| 1015 | Cc1c(c(n1)C(C)C)/C=N/Nc2nnc(n2N)SCC(=O)Nc3nnc(s3)SCCOC                                                                                                            |
| 1016 | COc1cc(cc(c1OC)OC)NC(=O)CSc2nnc(n2N)N/N=C/c3ccc(cc3)C(=O)OC                                                                                                       |
| 1017 | CC[C@H](C)Sc1nnc(s1)NC(=O)CSc2nc([nH]n2)N/N=C(\C)/c3ccc(c(c3)OC)OC                                                                                                |
| 1018 | Cc1cc(nc(n1)N/C(=N/C(=S)Nc2cc(c(c2)OC)OC)OC)/NCCc3cccc(cc3)F)C                                                                                                    |
| 1019 | C1CS(=O)(=O)C[C@H]1NCCOC(=O)NCCCCCN(C)OCCN[C@H]2CCS(=O)(=O)C2                                                                                                     |
| 1020 | CC[NH+](CC)CCN1[C@H](C(=C(C1=O)O)C(=O)c2cnn(c2C)c3cccc3)c4cccc(c4)OCC=C                                                                                           |
| 1021 | CCCOc1ccc(cc1OCC)[C@H]2C(=C(C(=O)N2CCC[NH+](C)C)O)C(=O)c3c(nc4n3cccc4)C                                                                                           |
| 1022 | CCCCCOc1ccc(cc1)[C@H]2C(=C(C(=O)N2CCC[NH+](C)C)O)C(=O)c3c(nc4n3cccc4)C                                                                                            |

|      |                                                                                                               |
|------|---------------------------------------------------------------------------------------------------------------|
| 1023 | <chem>CCOc1ccc(cc1)C(=O)C2=C(C(=O)N([C@@H]2c3ccc(c(c3)OCC)OCC=C)Cc4cc[nH+]cc4)O</chem>                        |
| 1024 | <chem>CC/C=C\C/C=C\C/C=C\C\CCCCCCCC(=O)OC[C@H](CO[C@H]1[C@@H]([C@@H]([C@@H]([C@@H](O1)CO)O)O)O)O</chem>       |
| 1025 | <chem>CCCOc1ccc(cc1OCC)[C@@H]2C(=C(C(=O)N2CCc3cc[nH+]c3)O)C(=O)c4c(nc(s4)C)C</chem>                           |
| 1026 | <chem>CC[C@H](C)NC(=O)c1csc(n1)C[NH+](CCc2ccc(c(c2)OC)OC)Cc3ccc4c(c3)OCO4</chem>                              |
| 1027 | <chem>Cc1c(c(n(n1)c2ccccc2)Oc3ccc(cc3)OC)C[NH+](Cc4ccco4)C[C@@H](COC(C)(C)C)O</chem>                          |
| 1028 | <chem>CC(C)OC[C@@H](C[NH+](Cc1c(nn(c1Oc2cccc(c2)OC)C)c3ccccc3)C[C@@H]4CCCO4)O</chem>                          |
| 1029 | <chem>Cc1ccc(cc1)C(=O)CCC(=O)OCC(=O)N(CCOC)c2c(n(c(=O)[nH]c2=O)Cc3ccccc3)N</chem>                             |
| 1030 | <chem>CCOc1cc(cc(c1OCC)OCC)C(=O)NCCn2c3c(cn2)c(ncn3)NCc4ccc(cc4)F</chem>                                      |
| 1031 | <chem>C[NH+](C)CCCN1[C@H](C(=C(C1=O)O)C(=O)c2ccc(cc2)OCC=C)c3cc(c(c(c3)OC)OC)OC</chem>                        |
| 1032 | <chem>CC(=O)N[C@@H]1[C@@H]([C@@H]([C@@H]([C@@H](O[C@@H]1OC(=O)CNC(=O)c2ccccc2)COC(=O)C)OC(=O)C)OC(=O)C</chem> |
| 1033 | <chem>Cc1ccc(c(c1)C)OCCn2c3ccccc3[nH+]c2CCNC(=O)c4cc(c(c(c4)OC)OC)OC</chem>                                   |
| 1034 | <chem>CC(C)c1cccc1OCCn2c3ccccc3[nH+]c2CCNC(=O)c4cc(c(c(c4)OC)OC)OC</chem>                                     |
| 1035 | <chem>COc1cc(cc(c1OC)OC)C(=O)NCCCc2[nH+]c3ccccc3n2CCOc4ccccc4Cl</chem>                                        |
| 1036 | <chem>Cc1cc(cc(c1)OCCn2c3ccccc3[nH+]c2CCNC(=O)c4cc(c(c(c4)OC)OC)OC)OC</chem>                                  |
| 1037 | <chem>COc1cc(cc(c1OC)OC)C(=O)NCc2[nH+]c3ccccc3n2CCCOc4ccccc4Cl</chem>                                         |
| 1038 | <chem>CCOC(=O)c1cccc(c1)NC(=O)CSc2nnc(n2CC=C)CCNC(=O)c3ccc(cc3)C</chem>                                       |
| 1039 | <chem>CCN(CC)S(=O)(=O)c1ccc(cc1)NC(=O)CSc2nnc(n2CC=C)CNc3ccccc3</chem>                                        |
| 1040 | <chem>CC[C@@H](C)NS(=O)(=O)c1ccc(cc1)NC(=O)CSc2nnc(n2CC=C)CNc3ccccc3</chem>                                   |
| 1041 | <chem>COc1cc2c(cc1OC)[nH]c(=O)n(c2=O)CCCC(=O)NCCOc3cccc(c3)C(F)F</chem>                                       |
| 1042 | <chem>COCCOc1cccc1C(=O)NC(=S)Nc2ccc(cc2)S(=O)(=O)Nc3cc(ncn3)OC</chem>                                         |
| 1043 | <chem>CCC[NH+](Cc1nc(c2c(c(sc2n1)C(=O)OC(C)C)C)[O-])C[C@@H](COc3ccc(cc3)Cl)O</chem>                           |
| 1044 | <chem>CCOc1ccc(cc1)[C@@H](C(=O)NC(C)(C)N(Cc2ccc(cc2)OC)C(=O)CCn3c(cc(n3)C)C</chem>                            |
| 1045 | <chem>CCCCOc1ccc(cc1)C(=O)Nc2ccc(cc2)c3nnc(n3C)SCCOc4ccc(cc4)C</chem>                                         |
| 1046 | <chem>CC[C@H](C)c1ccc(cc1)OCC(=O)N/N=C/c2ccc(cc2)OC(=O)c3cc(c(c(c3)OC)OC)OC</chem>                            |
| 1047 | <chem>CC(C)COP(=O)([C@](C(=O)OC)(C(F)F)F)Nc1nc2ccc(cc2s1)Cl)OCC(C)C</chem>                                    |
| 1048 | <chem>CCOc1ccc(cc1)/C(=C/2/[C@@H](N(C(=O)C2=O)CCc3ccnc3)c4ccc(c(c4)OCC)OCC)/O</chem>                          |
| 1049 | <chem>CC[NH+](CC)CCCN1[C@H](C(=C(C1=O)[O-])C(=O)c2ccc(cc2)OCC)c3ccc(c(c3)OCC)OCC</chem>                       |
| 1050 | <chem>CC[NH+](CC)CCCN1[C@H](C(=C(C1=O)[O-])C(=O)c2ccc3c(c2)C[C@H](O3)C)c4ccc(c(c4)OCC)OCC</chem>              |
| 1051 | <chem>CCCCSc1nnc(s1)/N=C/CSc2nnc(n2N)N/N=C/c3c(nn(c3C)C(C)C)\[O-]</chem>                                      |
| 1052 | <chem>CC[C@@H](c1ccc(cc1)OC)NC(=O)CN(c2ccc(cc2)OCC)S(=O)(=O)c3ccc(cc3)SC</chem>                               |
| 1053 | <chem>CCCC[NH+](CCCC)CCCN1[C@H](C(=C(C1=O)[O-])C(=O)c2ccc(cc2)C)c3ccc(cc3)C(=O)OC</chem>                      |
| 1054 | <chem>CC1=C(C(C(=C(N1)C)C(=O)OCC=C)c2ccc(cc2)OC(=O)COc3ccccc3F)C(=O)OCC=C</chem>                              |
| 1055 | <chem>CCCCSCCCNC(=O)c1c[nH]c2ccc(cc2c1=O)S(=O)(=O)[N-]c3cccc(c3)C(F)F</chem>                                  |
| 1056 | <chem>CC[NH+](CC)CCCN1[C@H](C(=C(C1=O)[O-])C(=O)c2cc3cc(ccc3o2)C)c4ccc(c(c4)OC)OCC</chem>                     |
| 1057 | <chem>CCOc1ccc(cc1OCC)[C@@H]2C(=C(C(=O)N2CCC[NH+](C)C)[O-])C(=O)c3cc4cccc(c4o3)OC</chem>                      |
| 1058 | <chem>CCCOc1ccc(cc1)C(=O)C2=C(C(=O)N([C@@H]2c3ccc(c(c3)OCC)OCC)CC[NH+](CC)CC)[O-]</chem>                      |
| 1059 | <chem>CC[NH+](CC)CCCN1[C@H](C(=C(C1=O)[O-])C(=O)c2cccc(c2)OCC)c3cccc(c3)Oc4ccccc4</chem>                      |
| 1059 | <chem>CCOc1cc(ccc1OCC=C)[C@@H]2C(=C(C(=O)N2CCc3cc[nH+]c3)[O-])C(=O)c4ccc(cc4)OC</chem>                        |

|      |                                                                                                                                    |
|------|------------------------------------------------------------------------------------------------------------------------------------|
| 1060 | CC[NH+](CC)CCN1[C@H](C(=C(C1=O)[O-])C(=O)c2ccc(cc2C)OCC=C)c3ccc(c(c3)OC)OCC=C                                                      |
| 1061 | CC[NH+](CC)CCCN1[C@H](C(=C(C1=O)[O-])C(=O)c2c(nc3n2cccc3)C)c4ccc(c(c4)OC)OCC                                                       |
| 1062 | CCCOc1ccc(cc1)/C=N\Nc2nc3c(n2C[C@H](COc4ccc(cc4)CC)O)c(nc(=O)n3C)[O-]                                                              |
| 1063 | Cc1c(c(n1)c2cccc2)Oc3ccc(cc3)OC)CN(Cc4ccc4)C[C@H](COCC(C)C)O                                                                       |
| 1064 | CCCCOC[C@H](CN(Cc1cccc1)Cc2c(nn(c2Oc3cccc(c3)OC)C)c4cccc4)O                                                                        |
| 1065 | Cc1cccc1OC[C@@H](CN(Cc2c(nn(c2Oc3cccc(c3)OC)C)c4cccc4)CC(C)C)O                                                                     |
| 1066 | CCCCOC[C@H](CN1CCN(CC1)c2c(c(nc(n2)c3cccc3)C)Cc4ccc(cc4)[N+](=O)[O-])O                                                             |
| 1067 | CCC(CC)[C@@H](C(=O)NCS(=O)(=O)c1ccc(cc1)C)N(Cc2ccc2)C(=O)Cc3cccc3C                                                                 |
| 1068 | CCCOc1cccc(c1)[C@@H]2C(=C(C(=O)N2CC[NH+](CC)CC)[O-])C(=O)c3cnn(c3C)c4cccc4                                                         |
| 1069 | CC[NH+](CC)CCCN1[C@H](C(=C(C1=O)[O-])C(=O)c2cnn(c2C)c3cccc3)c4cccc(c4)OCC                                                          |
| 1070 | CCCN(CCCC)S(=O)(=O)c1ccc(cc1)C(=O)Nc2nnc(o2)c3cccc(c3)SC(C)C                                                                       |
| 1071 | Cc1ccc(c(c1)OCCc2c3cccc3nc2[C@H](C)NC(=O)Cc4ccc(c(c4)OC)OC)C(C)C                                                                   |
| 1072 | CCCCCOc1ccc(cc1OC)[C@@H]2c3c(n[nH]c3C(=O)N2CCCO)c4cc(c(cc4[O-])C)Cl                                                                |
| 1073 | CCCOc1ccc(cc1OCC)[C@H]2c3c([nH]nc3C(=O)N2CCOC(C)C)c4cc(cc(c4[O-])C)C                                                               |
| 1074 | CCCCOc1ccc(cc1OC)[C@H]2c3c([nH]nc3C(=O)N2CCOC(C)C)c4c(cc(cc4[O-])C)C                                                               |
| 1075 | CCCCCOc1ccc(cc1OC)[C@H]2c3c([nH]nc3C(=O)N2CCOC)c4c(cc(cc4[O-])C)C                                                                  |
| 1076 | CC(C)(C)c1ccc(cc1)OCCc2nnc(n2CC=C)SCC(=O)Nc3cccc(c3)C(=O)OC                                                                        |
| 1077 | CCOc1cc(ccc1OCc2cccc2C)[C@@H]3C(=C(Nc4n3nc(n4)SCC)C)C(=O)OCC=C                                                                     |
| 1078 | CC[C@@H](c1nnnn1CCc2cccc2)N(Cc3cccs3)Cc4cc5cc(c(cc5[nH]c4=O)OC)OC                                                                  |
| 1079 | CCCCOc1ccc(cc1)[C@H]2C(=C(Nc3n2nc(n3)SCc4cccc4Cl)C)C(=O)OCC                                                                        |
| 1080 | CCCCOc1cccc1[C@H]2C(=C(Nc3n2nc(n3)SCc4cccc4Cl)C)C(=O)OCC=C                                                                         |
| 1081 | [H]/N=C\1/C(=C/c2ccc(c(c2)OC)OCCOCCc3ccc(cc3)C)/C(=O)N=C4N1N=C(S4)CCC                                                              |
| 1082 | Cc1cc(ccc1OCCc2nnc(n2CC=C)SCC(=O)Nc3ccc(ccc3OC)OC)Cl                                                                               |
| 1083 | C=CCn1c(nnc1SCC(=O)Nc2ncc(s2)Cc3cccc(c3)C(F)(F)F)COc4cccc4                                                                         |
| 1084 | CC(=O)Oc1c(cc2c(c1O)c(=O)cc(o2)c3cccc3)O[C@@H]4[C@H]([C@@H]([C@H]([C@@H](O4)C(=O)[O-])OC(=O)C)OC(=O)C)OC(=O)C                      |
| 1085 | CCCCCOc1ccc(cc1OC)/C=C(\C#N)/C(=O)Nc2nc(cs2)c3ccc(cc3)OC(C)C                                                                       |
| 1086 | CC[C@H](C)N(Cc1ccc(cc1OS(=O)(=O)c2ccc(c(c2)Cl)Cl)[NH+](CC)CC)C(=O)COC                                                              |
| 1087 | CC[NH+](CC)c1ccc(c(c1)OS(=O)(=O)c2cccc(c2)C(F)(F)F)CN(CC(C)C)C(=O)COC                                                              |
| 1088 | CCCCOP(=O)([C@@])(C(=O)OCC)(C(F)(F)F)NS(=O)(=O)c1ccc(cc1)C)OCCCC                                                                   |
| 1089 | CCCCOc1ccc(cc1C)C(=O)C2=C(C(=O)N([C@@H]2c3cccc(c3)Oc4cccc4)CCC[NH+](C)C)[O-]                                                       |
| 1090 | CC[NH+](CC)CCN1[C@H](C(=C(C1=O)[O-])C(=O)c2ccc(c(c2)C)OCC(C)C)c3cccc(c3)Oc4cccc4                                                   |
| 1091 | CCO/C(=C(\C=C)/OC)/C=C\CCN1c2cccc2/C(=N\NC(=O)COc3cccc4c3cccc4)/C1=O                                                               |
| 1092 | CCCCOc1ccc(cc1)c2cc(c(c(n2)SCC(=O)Nc3ccc(cc3)C(=O)OCC)C#N)C(F)(F)F                                                                 |
| 1093 | CCc1nnc(s1)NS(=O)(=O)c2ccc(cc2)NC(=O)c3ccc(cc3)S(=O)(=O)N(CCC#N)CCC#N                                                              |
| 1094 | Cc1ccc2c(c1)n(c(=O)n2C[C@H]([C@@H]3[C@H]([C@H]4[C@H](O3)OC(O4)(C)C)OCC=C)O)C[C@H]([C@@H]5[C@@H]([C@@H]6[C@H](O5)OC(O6)(C)C)OCC=C)O |
| 1095 | CC[NH+][1]CCN(CC1)c2cccc3c2CN(C3=O)[C@H](CCCNS(=O)(=O)c4cccc4)c5ccc(c(c5)OC)OC                                                     |
| 1096 | CC(C)C(=O)Nc1[nH]c(=O)c2c(n1)n(cn2)[C@@H]3C[C@@H]([C@@H](O3)O)P@=(O)O([O-])Oc4ccc(cc4)Cl)OC(=O)CCC(=O)C                            |

|      |                                                                                                                                                                                 |
|------|---------------------------------------------------------------------------------------------------------------------------------------------------------------------------------|
| 1097 | Cc1c2cc3[nH+]c(cc4c(c(c([nH]4)cc5[nH+]c(cc(c1CCC(=O)O)[nH]2)C(=C5CCC(=O)[O-])C)C)CCC(=O)[O-])C(=C3CCC(=O)[O-])C                                                                 |
| 1098 | c1cnn(c1)c2ccc(cc2)NC(=S)NC[C@H]3C[C@@H]4CCN3C[C@@H]4C[NH+]5CCN(CC5)C(=S)Nc6ccc(cc6)n7cccn7                                                                                     |
| 1099 | C/C(=C\C[C@](C)(C=C)O[C@H]1[C@@H]([C@H]([C@@H]([C@H](O1)CO)OC(=O)/C(=C/CC[C@](C)(C=C)O)/C)OC(=O)/C(=C/CC[C@](C)(C=C)O)/C)O)/C(=O)[O-]                                           |
| 1100 | C/C(=C\C[C@](C)(C=C)O[C@H]1[C@@H]([C@H]([C@@H]([C@H](O1)COC(=O)/C(=C/CC[C@](C)(C=C)O)/C)O)OC(=O)/C(=C/CC[C@](C)(C=C)O)/C)O)/C(=O)[O-]                                           |
| 1101 | C/C(=C\C[C@](C)(C=C)O[C@H]1[C@@H]([C@H]([C@@H]([C@H](O1)COC(=O)/C(=C/CC[C@](C)(C=C)O)/C)O)OC(=O)/C(=C/CC[C@](C)(C=C)O)/C)O)/C(=O)[O-]                                           |
| 1102 | C/C(=C\C[C@](C)(C=C)O[C@H]1[C@@H]([C@H]([C@@H]([C@H](O1)CO)OC(=O)/C(=C/CC[C@](C)(C=C)O)/C)OC(=O)/C(=C/CC[C@](C)(C=C)O)/C)O)/C(=O)O                                              |
| 1103 | C/C(=C\C[C@](C)(C=C)O[C@H]1[C@@H]([C@H]([C@@H]([C@H](O1)CO)OC(=O)/C(=C/CC[C@](C)(C=C)O)/C)OC(=O)/C(=C/CC[C@](C)(C=C)O)/C)O)/C(=O)O                                              |
| 1104 | C/C(=C\C[C@](C)(C=C)O[C@H]1[C@@H]([C@H]([C@@H]([C@H](O1)COC(=O)/C(=C/CC[C@](C)(C=C)O)/C)O)OC(=O)/C(=C/CC[C@](C)(C=C)O)/C)O)/C(=O)O                                              |
| 1105 | C/C(=C\C[C@](C)(C=C)O[C@H]1[C@@H]([C@H]([C@@H]([C@H](O1)COC(=O)/C(=C/CC[C@](C)(C=C)O)/C)O)OC(=O)/C(=C/CC[C@](C)(C=C)O)/C)O)/C(=O)O                                              |
| 1106 | c1c(cc(cc1CO)OCc2cc(cc(c2)COc3cc(cc(c3)CO)CO)COc4cc(cc(c4)CO)CO)CO                                                                                                              |
| 1107 | CC(=O)O[C@H]1[C@@H]([C@@H]([C@H]([C@@H]([C@H]1O)O[C@@H]1)/C=N\C23CC4CC(C2)CC(C4)C3)[C@@H](CO)O[C@@H]1/C=N/C56CC7CC(C5)CC(C7)C6)O)CO)O                                           |
| 1108 | CCCO[C@H]1[C@@H]2[C@H](O[C@@H]1[C@@H](CO[C@H]3[C@@H]([C@H]([C@@H]([C@H](O3)COC(=O)C)OC(=O)C)OC(=O)C)NC(=O)C)O)OC(O2)(C)C                                                        |
| 1109 | C[C@]12CCC(=O)C=C1CC[C@H]3[C@@H]2C(=O)C[C@]4([C@H]3CC[C@]4(C(=O)COC(=O)CCC(=O)N[C@@H](CCSC)C(=O)[O-])O)C                                                                        |
| 1110 | c1cc(c(cc1CC[NH2+])CCC(=O)N(CCNCCc2ccc(c3c2OCC(=O)N3)O)C4CCCC4)Cl)Cl                                                                                                            |
| 1111 | c1ccc(cc1)COc2c3c(n/c(=N/CNc4[nH+]c(c5c(n4)n(cn5)COCCO)OCc6cccc6)/[nH]2)n(cn3)COCCO                                                                                             |
| 1112 | COc1cccc1OCC[NH2+][C@H](COc2cccc3c2c4cccc4n3C[C@@H](COc5cccc6c5c7cccc7[nH]6)O)O                                                                                                 |
| 1113 | c1ccc2c(c1)c3c([nH]2)cccc3OC[C@H](C[NH2+])CCOc4cccc4OCC[NH2+][C@H](COc5cccc6c5c7cccc7[nH]6)O)O                                                                                  |
| 1114 | CC(=O)OC[C@H]1[C@H]([C@@H]([C@H]([C@@H](O1)Nc2ccc(cc2)Oc3ccnc(c3)C(=O)NC)OC(=O)C)OC(=O)C)OC(=O)C)OC(=O)C                                                                        |
| 1115 | CCCCCCCCC/N=C/[C@]12CC[C@H](C[C@]1(CC[C@H]3[C@@H]2CC[C@]4([C@@]3(CC[C@H]4C5=CC(=O)OC5)O)C)O)O[C@@H]6C[C@@H]([C@@H]([C@H](O6)C)O)O                                               |
| 1116 | CCCCCCCCCN=C[C@]12CC[C@H](C[C@]1(CC[C@H]3[C@@H]2CC[C@]4([C@@]3(CC[C@H]4C5=CC(=O)OC5)O)C)O)O[C@@H]6C[C@@H]([C@@H]([C@H](O6)C)O)O                                                 |
| 1117 | C[C@H]1C[C@]([C@@H](C[NH+]1C)C)(CCNC(=O)CCC(=O)OCC(=O)[C@]2(CC[C@H]3[C@@]2[C[C@H]([C@H]4[C@H]3CCC5=CC(=O)CC[C@]45C)O)C)O)c6ccc(cc6)OC                                           |
| 1118 | CC[C@H]([C@H]1CC[C@H]([C@@H](O1)[C@@H](C)[C@H]([C@H](C)C(=O)[C@H](CC)[C@H]2[C@H](C[C@H]([C@]3(O2)CC[C@H]([C@@]4(O3)C[C@](O4)(C)[C@H]5CC[C@]([C@@H](O5)C)(CC)O)O)C)O)C)C(=O)[O-] |
| 1119 | C[C@]12CC[C@H]3c4ccc(cc4C[C@H]([C@H]3[C@@H]1CC[C@H]2O)CCCCCCCC[S@](=O)CCCC(C(F)(F)F)(F)O[C@H]5[C@@H]([C@H]([C@@H]([C@H](O5)C(=O)[O-])O)O)O                                      |
| 1120 | CC1=C2[C@H](C(=O)[C@]3([C@H]([C@@H]([C@@](C2(C)C)(C[C@H]1OC(=O)[C@@H]([C@H](c4cccc4)NC(=O)OC(C)(C)C)O)OC(=O)c5cccc5)[C@@]6(CO[C@H]6[C@H]7[C@@H]3O7)OC(=O)C)C)[O-]               |
| 1121 | CC1=C2[C@H](C(=O)[C@]3([C@H](C[C@H]4[C@]([C@@H]3[C@@H]([C@@](C2(C)C)(C[C@H]1OC(=O)[C@@H]([C@H](c5cccc5)/N=C(/O)\OC(C)(C)C)O)O)OC(=O)c6cccc6)(CO4)OC(=O)C)O)C)O                  |
| 1122 | CSCC[C@H](C(=O)N[N-]S(=O)(=O)c1ccc(c(c1)Cl)Cl)NS(=O)(=O)c2cc(cc(c2)C(F)(F)F)C(F)(F)F                                                                                            |
| 1123 | CCOC(=O)Cc1csc(n1)NC(=O)CSc2nnc(s2)SCC(=O)Nc3nc(cs3)CC(=O)OCC                                                                                                                   |
| 1124 |                                                                                                                                                                                 |
| 1125 |                                                                                                                                                                                 |
| 1126 |                                                                                                                                                                                 |
| 1127 |                                                                                                                                                                                 |
| 1128 |                                                                                                                                                                                 |
| 1129 |                                                                                                                                                                                 |
| 1130 |                                                                                                                                                                                 |
| 1131 |                                                                                                                                                                                 |
| 1132 |                                                                                                                                                                                 |
| 1133 |                                                                                                                                                                                 |

|      |                                                                                                                                                                                |
|------|--------------------------------------------------------------------------------------------------------------------------------------------------------------------------------|
| 1134 | CC[C@ @H](C(=O)NC/C=C/C=C(\C)/[C@ @H]([C@ @H](C)[C@ @H]1[C@ @H]([C@ @H]([C@ @H]([C@ @H](O1)/C=C/C=C/C=C(\C)/C(=O)c2c(cc[nH]c2=O)[O-                                            |
| 1135 | ])O)O)OC[C@ @]3([C@ @H]([C@ @H](C([C@ @H](O3)/C=C/C=C/C)(C)C)O)O)O                                                                                                             |
| 1136 | Cc1cc(cc(c1)NS(=O)(=O)c2ccc(cc2)NC(=O)CCCC(=O)Nc3ccc(cc3)S(=O)(=O)[N-jc4cc(cc(c4)C)C)C                                                                                         |
| 1137 | CCN(CC)c1ccc(cc1)NC(=O)CSc2c(c(sn2)SCC(=O)Nc3ccc(cc3)N(CC)CC)C#N                                                                                                               |
| 1138 | CCOc1cc(cc(c1OCC)OCC)C(=O)NCc2nnc(n2c3cccc(c3C)C)SCC(=O)Nc4nnc(s4)C                                                                                                            |
| 1139 | CC(=O)CCC(=O)O[C@ @H]1C[C@ @H](O[C@ @H]1O[P @ @])(=O)([O-])Oc2ccc(cc2)Cl)n3cnc4c3N=CN[C@ @H]4NC(=O)c5cccc5                                                                     |
| 1140 | CC[NH+](CC)c1ccc(c(c1)OCc2c(cccc2Cl)F)/C=N/NC(=O)c3c(n(nn3)c4c(non4)N)C[NH+]5CCC(CC5)C                                                                                         |
| 1141 | CCSc1nnc(s1)NC(=O)CSc2nnc(n2c3ccc(cc3)Br)CNC(=O)c4ccc(cc4)S(=O)(=O)N5CCCC5                                                                                                     |
| 1142 | c1ccc(cc1)c2nc(c(o2)COC(=O)C[C@ @H](c3cccc3)NC(=O)c4cccc4)COC(=O)C[C@ @H](c5cccc5)NC(=O)c6cccc6                                                                                |
| 1143 | CCCCSc1nnc(s1)NC(=O)CSc2nnc3n2nc(s3)SCC(=O)Nc4nnc(s4)SCCC                                                                                                                      |
| 1144 | CCOc1ccc(cc1OCC)CCNS(=O)(=O)c2cc(ccc2C)c3c4cccc4c(n[nH+]3)Nc5ccc(cc5)C(=O)N                                                                                                    |
| 1145 | c1cc(ccc1c2ccc(cc2)NC(=O)CCCC(=O)OCC(C(F)F)(F)F)NC(=O)CCCC(=O)OCC(C(F)F)(F)F                                                                                                   |
| 1146 | C=CCc1cccc(c1O)/C=N/NC(=O)CSc2nnc(n2CC=C)CNc3ccc(cc3)I                                                                                                                         |
| 1147 | COc1ccc(c(c1)n2c(nnc2SCC(=O)Nc3nccs3)CNC(=O)c4cc(cc(c4)OC)OC)OC                                                                                                                |
| 1148 | CCc1nnc(s1)NC(=O)CCCCN2C(=O)/C(=C\3/C(=O)N(C(=S)S3)CCCCC(=O)Nc4nnc(s4)CC)/SC2=S                                                                                                |
| 1149 | CCCCCCCCCCCCCS(=O)(=O)c1ccc(cc1C(=O)[O-])S(=O)(=O)NNc2[n+](c3cccc3s2)C                                                                                                         |
| 1150 | CCOc1ccc(cc1)C(=O)Oc2ccc(cc2)/C=N/NC(=O)C(=O)Nc3cccc3C(=O)Nc4ccc(cc4)C                                                                                                         |
| 1151 | CC(=O)O[C@ @H]1[C@ @H]([C@ @H]([C@ @H](O[C@ @H]([C@ @H]1OC(=O)C)O[C@ @H]2CC[C@ @]3([C@ @H](C2)CC[C@ @H]4[C@ @H]3C(=O)C[C@ @]5([C@ @H]4CC[C@ @H]5[C@ @H](CO)O)C)C(=O)OC)OC(=O)C |
| 1152 | CC(=O)O[C@ @H]1[C@ @H]([C@ @H]([C@ @H]([C@ @H]1OC(=O)C)OCC(=O)[C@ @]2(CC[C@ @H]3[C@ @]2(C[C@ @H]([C@ @H]4[C@ @H]3CCC5=CC(=O)C=C[C@ @]45C)O)C)O)C(=O)OC)OC(=O)C                 |
| 1153 |                                                                                                                                                                                |
| 1154 | Cc1c(sc(n1)n2c(cc(n2)c3cccc3)c4cccc4)C(=O)/C=C(\C(=O)Nc5cccc5C(=O)C)/NNC(=O)c6cccc6S(=O)(=O)N                                                                                  |
| 1155 | CC(C)CN(C[C@ @H]([C@ @H]([C@ @H](c1cccc1)c2c(c3cccc3oc2=O)[O-])/C(=N/NC(=O)c4cccc4S(=O)(=O)N)/C)CC(C)C                                                                         |
| 1156 | c1ccn2c(c1)nc(c(c2=O)/C=C\3/C(=O)N(C(=S)S3)CCCCCCCCC(=O)[O-])NCCOCCO                                                                                                           |
| 1157 | Cc1c(cccc1NC(=O)CCC(=O)N/N=C\c2ccc(cc2)/C=N\NC(=O)CCC(=O)Nc3c(c(ccc3)Cl)C)Cl                                                                                                   |
| 1158 | CCCNc1c(c(=O)n2cccc2n1)/C=C\3/C(=O)N(C(=S)S3)C[C@ @H]4CCCO4                                                                                                                    |
| 1159 | Cc1cc(c(n1)[C@ @H]2CCS(=O)(=O)C2)C(=O)CSc3[nH]c(nn3)c4cccc4                                                                                                                    |
| 1160 | Cc1c(cnn1c2cccc2)C(=O)NCCN3C(=O)/C(=C/c4cccc4)/SC3=O                                                                                                                           |
| 1161 | Cc1c(c2c(cn1)CN(CC2)C(=O)c3cccc(c3)N4CCCC4=O)CNC(=O)Cc5ccsc5                                                                                                                   |
| 1162 | Cc1c(c2c(cn1)CN(CC2)C(=O)c3csc(n3)SC)CNS(=O)(=O)c4ccsc4                                                                                                                        |
| 1163 | CN([C@ @H]1CCc2c1cccc2)C(=O)c3ccc(cc3)NC(=O)C[C@ @H]4C(=O)N=C(S4)N5CCCC5                                                                                                       |
| 1164 | c1cc(cc(c1)S(=O)(=O)N2CCCC2)NC(=O)c3ccc(cc3)S(=O)(=O)C(F)F                                                                                                                     |
| 1165 | COC(=O)C[C@ @H](c1ccc(cc1)Cl)NC(=O)c2ccc(cc2)CN3C(=O)CCC3=O                                                                                                                    |
| 1166 | Cc1nccn1CCC(=O)NCC2CCC(CC2)c3cc(c4cccc4n3)C(=O)N(C)C                                                                                                                           |
| 1167 | Cc1ccc(nc1)c2ccc3c(c2)C[C@ @H](O3)CNC(=O)CCN(C)[C@ @H]4CCS(=O)(=O)C4                                                                                                           |
| 1168 | Cc1c(cnc(n1)C)C(=O)C2=C(C(=O)N([C@ @H]2c3cccc(c3)Cl)CCC[NH+](C)C)[O-]                                                                                                          |
| 1169 | c1cc(c(cc1S(=O)(=O)NC2CC2)C(=O)N3CCN(CC3)CCN4CCCC4)Br                                                                                                                          |
| 1170 | c1cc(cc(c1)S(=O)(=O)N2CCCC2)NC(=O)CN3CCN(CC3)Cc4ccsc4                                                                                                                          |

|      |                                                                                                              |
|------|--------------------------------------------------------------------------------------------------------------|
| 1171 | Cc1c(sc2c1c(=O)n(cn2)CCC(=O)NCc3ccc(o3)c4csc(n4)C)C                                                          |
| 1172 | Cn1ccnc1[C@@](CC(=O)N2CCCN(CC2)c3ccc(cn3)C(F)(F)F)(C(F)(F)F)O                                                |
| 1173 | c1ccc(cc1)S(=O)(=O)N2CCN(CC2)Cc3nc4ccc(cc4n3CCO)Cl                                                           |
| 1174 | c1ccc2c(c1)CCN2C(=O)CSc3cccc3C(=O)NCc4nnc5n4CCCC5                                                            |
| 1175 | CCN(CC)C1=NC(=O)[C@@H](S1)CC(=O)Nc2cccc(c2)C(=O)N(C)[C@@H](C)C3CC3                                           |
| 1176 | CCN1CCN(CC1)CCCNC(=O)c2cc(ccc2Cl)S(=O)(=O)N3CCSCC3                                                           |
| 1177 | c1cc(ccc1/C=C/2\C(=O)N(C(=S)S2)CCCC(=O)N[C@H]3CS(=O)(=O)C=C3)F                                               |
| 1178 | Cc1c(sc(n1)C)C(=O)C2=C(C(=O)N([C@H]2c3cccc3OCC=C)CC[NH+](C)C)[O-]                                            |
| 1179 | Cc1c(sc(n1)C)C(=O)C2=C(C(=O)N([C@H]2c3ccc(cc3)N(C)C)CCOC)O                                                   |
| 1180 | Cc1c(sc(n1)C)C(=O)C2=C(C(=O)N([C@H]2c3cccs3)CCc4cc[nH+]c4)[O-]                                               |
| 1181 | c1cc(cc(c1)Cl)N2CCN(CC2)Cc3nc(cs3)C(=O)NCc4cccnc4                                                            |
| 1182 | CC[C@@H](C)/C=C/C1=CC2=C(C(=O)[C@]3([C@@H](C2=CO1)[C@@H](C(=O)O3)C(=O)[C@@H](C)[C@@H](C)O)C)Cl               |
| 1183 | Cc1c(sc(n1)C)C(=O)C2=C(C(=O)N([C@H]2c3cccc(c3)OCC=C)CC[NH+](C)C)[O-]                                         |
| 1184 | c1cc(sc1)C2=NN[C@@H](N2C3CC3)SCC(=O)C4=CC(=NC4)C(=O)N5CCCC5                                                  |
| 1185 | C[C@H](Cn1ccnc1)NC(=O)c2cccc(c2)S(=O)(=O)N3CCc4c(ccs4)C3                                                     |
| 1186 | C[C@]1(CC1(Cl)Cl)C(=O)NCCS(=O)(=O)N2CCN(CC2)C(=O)[C@@]3(CC3(Cl)Cl)C                                          |
| 1187 | c1cc(cc(c1)Br)NC(=O)COc2coc(cc2=O)CN3CCSCC3                                                                  |
| 1188 | CS(=O)(=O)c1ccc(cc1)NC(=O)CS(=O)(=O)Cc2cccc(c2)Br                                                            |
| 1189 | Cn1ccnc1[C@@H](c2cccc2N3CCN(CC3)Cc4ccc(c(c4)OC)OCC#C)O                                                       |
| 1190 | c1ccc(c(c1)CN(CCS(=O)(=O)N2CCNCC2)C(=O)Cc3cccs3)Cl                                                           |
| 1191 | CN(C[C@H]1CC=C(S1)Cl)C(=O)CCc2[nH]c(=O)c3cnn(c3n2)c4cccc4                                                    |
| 1192 | c1cc(sc1)CNS(=O)(=O)c2ccc3c(c2)CCN3C(=O)CCC(=O)N4CCCC4                                                       |
| 1193 | CCN1CCC[C@H]1CN(CC(=O)N2CCNCC2)S(=O)(=O)c3c(cc(cc3C)C)C                                                      |
| 1194 | Cc1cccc(c1NC(=O)CN(C)C(=O)c2ccnc2SCc3c(noc3C)C)C                                                             |
| 1195 | Cc1c(nnn1c2cccc3c2CCN(C3)Cc4cccnc4)C(=O)NCC(F)(F)F                                                           |
| 1196 | CCN(CC)c1ccc(cc1)NC(=O)CCCN2C(=O)c3cccc3N4[C@@]2(CCC4=O)C                                                    |
| 1197 | Cc1nccn1C[C@@H](C)CNC(=O)CCn2cnc3ccc(cc3c2=O)Br                                                              |
| 1198 | CCN1CCN(CC1)[C@@H](C)CNc2c3c(c(sc3nc(n2)CN4CCOCC4)C)C                                                        |
| 1199 | COC(=O)C[C@@H](c1cccc(c1)Br)NC(=O)c2ccc(cc2)N3CCCCC3=O                                                       |
| 1200 | Cn1c(c2ccc(cc2nc1=S)C(=O)N(CC[NH+](C)C)Cc3ccc(cc3F)F)[O-]                                                    |
| 1201 | c1cc(ccc1C(=O)N2CSC[C@H]2C(=O)Nc3ccn(n3)CCc4ccncc4)Cl                                                        |
| 1202 | CCn1cc(c(=O)c2c1ccc(c2)S(=O)(=O)N(C)C)C(=O)NCCc3ccc(cc3)Cl                                                   |
| 1203 | CCn1cc(c(=O)c2c1ccc(c2)S(=O)(=O)N(C)C)C(=O)NCCc3ccc(cc3)C                                                    |
| 1204 | C[C@@H](C(=O)Nc1ccc(c(c1)Cl)Cl)Sc2c(on[n+]2c3ccc(cc3)OC)[O-]                                                 |
| 1205 | Cn1c(cc(=O)c(c1)CN2CCc3cccc3C2)O)CN4CCc5cc(c(cc5C4)OC)OC                                                     |
| 1206 | CCC(=O)NCc1nc2c(n1C)CN(CC2)S(=O)(=O)c3cccc(c3)C(F)(F)F                                                       |
| 1207 | Cc1cc(c(n1c2ccc(cc2)C#N)C)C(=O)N(CCO)Cc3cc(ccc3OC)OC                                                         |
| 1208 | CCCCCCCCCCCC(=O)O[C@@H]1[C@H]([C@]2([C@@H](C=C(C[C@@]3([C@H]2C=C(C3=O)C)O)CO)[C@H]4[C@@]1(C4(C)C)OC(=O)C)O)C |

|      |                                                                                                                                                                                |
|------|--------------------------------------------------------------------------------------------------------------------------------------------------------------------------------|
| 1208 | CCOc1cc(cc(c1OCC)OCC)C(=O)Nc2ccc(cc2NC(=O)c3cc(c(c(c3)OCC)OCC)OCC)C                                                                                                            |
| 1209 | Cc1ccc(cc1)S(=O)(=O)n2ccc3c2cccc3OCCOCCSC[C@H](C(=O)[O-])NC(=O)OC(C)(C)C                                                                                                       |
| 1210 | CCCCCCCCCCCC(=O)O[C@@H]1[C@H]([C@]2([C@@H](C=C(C[C@]3([C@H]2C=C(C3=O)C)OC)CO)[C@H]4[C@@]1(C4(C)C)OC(=O)C)O)C                                                                   |
| 1211 | CCc1c(cc(c(c1CC(=O)N(CCOC)CCOC)C(=O)c2ccc(c(c2)OC)OCCN3CCOCC3)[O-])O                                                                                                           |
| 1212 | CC[C@H](C)[C@H](C(=O)[O-])NC(=O)CCC(=O)OCC(=O)[C@]1(CC[C@]2[C@@]1(CC[C@H]3[C@H]2CCC4=CC(=O)CC[C@]34C)C)OC(=O)C                                                                 |
| 1213 | CCCCC(=O)OCC(=O)[C@]1([C@@H](C[C@]2[C@@]1(C[C@]3([C@H]2CCC4=CC(=O)C=C[C@]43C)F)OC(=O)CCCC)C)C)O                                                                                |
| 1214 | CCc1ccc([nH+]c1)CCOc2ccc(cc2)C[C@H](C(=O)[O-])SS[C@H](Cc3ccc(cc3)OCCc4ccc(cn4)CC)C(=O)[O-]                                                                                     |
| 1215 | CCc1ccc([nH+]c1)CCOc2ccc(cc2)C[C@H](C(=O)OCC)SS[C@H](Cc3ccc(cc3)OCCc4ccc(cn4)CC)C(=O)OCC                                                                                       |
| 1216 | CCC/C(=N\C@]@H](C)CN/C(=C\1/C(=O)CC([C@H](C1=O)C(=O)OC)(C)C)/CCC/C2=C([C@@H](C(CC2=O)(C)C)C(=O)OC)[O-]                                                                         |
| 1217 | CCCCCCCCCCCCCCCCCCCC(=O)Nc1ccn(c(=O)n1)[C@H]2[C@@H]([C@@H]([C@@H](O2)CO)O)O                                                                                                    |
| 1218 | CCC/C(=C/CC)\C(=O)CCC(=O)N(Cc1cccc1)Cc2cccc2)/NCC(=O)c3cc4cccc4cc3O                                                                                                            |
| 1219 | CCc1ccc([nH+]c1)CCOc2ccc(cc2)c3cc(ccc3OCCc4ccc(cn4)CC)C[C@]5C(=O)NC(=O)S5                                                                                                      |
| 1220 | CC(=O)O[C@@]1(CC[C@]2[C@@]1(CC[C@H]3[C@H]2CCC4=CC(=O)CC[C@]34C)C)C(=O)COC(=O)CCC(=O)N[C@H](CC(=O)[O-])                                                                         |
| 1221 | ][C@@H]5CCOC(C5)(C)C                                                                                                                                                           |
| 1222 | Cc1c(ccc2c1oc(=O)cc2c3cccc3)OC[C@H](CN(Cc4ccco4)C[C@]@H](COc5ccc6c(cc(=O)oc6c5C)c7cccc7)O)O                                                                                    |
| 1223 | C[C@H]1CCC(=[NH+]C1)[C@@H](C)[C@H]2[C@@H](C[C@H]3[C@@]2(CC[C@@H]4[C@H]3CC=C5[C@@]4(CC[C@@H](C5)O[C@@H]6[C@@H]([C@H]([C@@H]([C@H](O6)COC(=O)C)OC(=O)C)OC(=O)C)C)OC(=O)C)OC(=O)C |
| 1224 | Cc1cc(nc(n1)[N-]S(=O)(=O)c2ccc(cc2)NC(=O)[C@@](C(F)(F)F)(OC([C@@](C(F)(F)F)(OC(C(C(F)(F)F)(F)F)(F)F)F)F)F)C                                                                    |
| 1225 | c1ccc(cc1)C(=O)N[C@@H]2[C@H]([C@@H]([C@H](O[C@@H]2OC(=O)c3cccc3)COC(=O)c4cccc4)OC(=O)c5cccc5)OC(=O)c6cccc6                                                                     |
| 1226 | Cc1cc(cc(c1O)C(C)(C)C)CCC(=O)OCCOCCOCCOC(=O)CCc2cc(c(c(c2)C(C)(C)O)C                                                                                                           |
| 1227 | CCCC[NH+](CCCC)CN1c2ccc(cc2/C(=N)NC(=O)COc3cc(ccc3C(C)C)/C1=O)Br                                                                                                               |
| 1228 | c1ccc(cc1)/C(=[NH+])CCC[NH+](CCC/[NH+]=C(/c2cccc2)\c3cccc3O)CCC/N=C(/c4cccc4)\c5cccc5O)/c6cccc6O                                                                               |
| 1229 | CCOc1ccc(cc1C)c2c(cn(n2)c3cccc3)/C=C\4/C(=O)N(C=S)S4)CCCCCCCC(=O)O                                                                                                             |
| 1230 | CCN(CC)c1ccc(cc1)/C=C\C(=O)N/N=C/c2ccc(c(c2)OCC)OC(=O)c3cccc3Cl)/NC(=O)c4cccc4Cl                                                                                               |
| 1231 | [H]/N=C\1/C(=C/c2cn(c3c2cccc3)CCOc4cccc4[C@H](C)CC)/C(=O)N=C5N1N=C(S5)CCCCC                                                                                                    |
| 1232 | Cc1cc(c(c(c1S(=O)(=O)/N=C(/N)\NCCC[C@H](C(=O)On2c(=O)c3cccc3nn2)NC(=O)OCC4c5cccc5-c6c4cccc6)C)C)OC                                                                             |
| 1233 | CCOc1cc(cc(c1OCC)OCC)C(=O)Nc2nnc(s2)SCC(=O)Nc3cccc3C(F)(F)F                                                                                                                    |
| 1234 | CCOc1cc(cc(c1OCC)OCC)C(=O)Nc2nnc(s2)SCC(=O)Nc3cc(ccc3Cl)C(F)(F)F                                                                                                               |
| 1235 | c1ccc2c(c1)/C(=C/3\C(=O)N(C=S)S3)CCCCCCCC(=O)[O-]/C(=O)N2CC(=O)Nc4ccc(cc4)F                                                                                                    |
| 1236 | CC[NH+](CC)c1ccc(c(c1)OCc2ccc(cc2Cl)Cl)/C=N/Nc3nc(nc(n3)Nc4ccc(cc4)OC)NCc5ccco5                                                                                                |
| 1237 | CCC/C(=N)OC(C(F)(F)F)(C(F)(F)F)NC(=O)Nc1cccc(c1)[C@@](C(=O)OCC)(C(F)(F)F)O)/Cl                                                                                                 |
| 1238 | CCCCCCCCCOc1ccc(cc1)C(=O)Nc2ccc3c(c2)sc(n3)SCC(=O)NC[C@@H]4CCCO4                                                                                                               |
| 1239 | CCOc1ccc(cc1OCC)CCNS(=O)(=O)c2cc(ccc2C)c3c4cccc4c([nH+]3)Nc5ccc(cc5)OC                                                                                                         |
| 1240 | CCCCCCCC(=O)N(CCc1ccc(c(c1)OC)OC)CCC(=O)Nc2nnc(s2)c3ccc(cc3)Cl                                                                                                                 |
| 1241 | CCOC(=O)[C@](c1ccc(cc1)NC(=O)N[C@@](C(=O)OCC)(C(F)(F)F)OCC(F)(F)F)(C(F)(F)F)O                                                                                                  |
| 1242 | c1cc(oc1)c2cc(nc(n2)SCC(=O)Nc3cc(cc(c3)OCC(F)(F)F)OCC(F)(F)F)C(F)(F)F                                                                                                          |
| 1243 | c1cc2c(ccnc2cc1Cl)NCCC[NH+]3CCN(CC3)CCCCC[NH+]4CCN(CC4)CCCNc5ccnc6c5ccc(c6)Cl                                                                                                  |
| 1244 | CCC(C)(C)c1ccc(c(c1)C(C)(C)CC)OCCCC(=O)Nc2ccc(c(c2)N/C(=C\C(=O)c3ccc(cc3)OC)/n4c(c[nH]c4=O)C(=O)OC(C)C)/[O-]OC                                                                 |

|      |                                                                                                                        |
|------|------------------------------------------------------------------------------------------------------------------------|
| 1245 | CCCCOc1ccc(cc1)C(=O)Oc2ccc(cc2)/C=N/NC(=O)c3ccccc3[N-]S(=O)(=O)c4ccc(cc4)Cl                                            |
| 1246 | CCCCCCCCCCCC(=O)NCC(=O)N/N=C/c1ccc(c(c1)OC)OC(=O)c2ccc(cc2Cl)Cl                                                        |
| 1247 | CCOc1ccc(cc1)C(=O)Oc2ccc(cc2OCC)/C=N/NC(=O)c3ccc(cc3)[N-]S(=O)(=O)c4ccc(cc4)Cl                                         |
| 1248 | Cc1cc(ccc1OCC(C)C)c2c(cn(n2)c3ccccc3)/C=C\4/C(=O)N(C(=S)S4)CCCCCCCCCCCC(=O)O                                           |
| 1249 | CC(C)(C)CC(C)(C)c1ccc(cc1)OCCOc2ccc(cc2N)C(=O)NCCNC(=O)c3ccc4ccccc4c3O                                                 |
| 1250 | CCCCCCCCCCCCCCCCCOc1ccc(c(c1)S(=O)(=O)[N-]Nc2[n+](c3ccccc3s2)C)C(=O)[O-]                                               |
| 1251 | CC1([C@@H]2CC[C@]1([C@])([C@@H]2OCc3ccc(cc3)OC)(C=C[C@]4(COC(O4)(C)C)[C@@H](C=C)OCc5ccc(cc5)OC)O)C=C)C                 |
| 1252 | CC1([C@@H]2CC[C@]1([C@])([C@@H]2OCc3ccc(cc3)OC)(C=C[C@]4(COC(O4)(C)C)[C@@H](C=C)OCc5ccc(cc5)OC)O)/C=C\OCc6ccc(cc6)OC)C |
| 1253 | CCCCOc1ccc(cc1)C(=O)Oc2ccc(cc2OC)/C=N/NC(=O)COc3cc(c(cc3C(C)C)Br)C                                                     |
| 1254 | COc1ccc(cc1)NC(=O)CN2c3ccccc3/C=C\4/C(=O)N(C(=S)S4)CCCCCCCCCCCC(=O)[O-]/C2=O                                           |
| 1255 | CCCCCCCC[C@H](c1ccc2c(c1)OCCOCCOc3ccc(cc3OCCOCCO2)[C@H](CCCCCCCC)O)O                                                   |
| 1256 | Cc1cn(c(=O)[nH]c1=O)[C@H]2C[C@@H]([C@H](O2)COC(=O)OC[C@]3(C)C)C3ccccc3[N+](=O)[O-])O[P@@](N(C(C)C)C(C)C)OCCC#N         |
| 1257 | Cc1cn(c(=O)[nH]c1=O)[C@H]2C[C@@H]([C@H](O2)COC(=O)OC[C@]3(C)C)C3ccccc3[N+](=O)[O-])O[P@](N(C(C)C)C(C)C)OCCC#N          |
| 1258 | CCCOc1ccc(cc1OCC)/C=N/NC(=O)c2ccc(cc2)N(Cc3ccccc3Cl)S(=O)(=O)C                                                         |
| 1259 | CC[C@H](C)c1ccc(cc1)OCCOc2ccc(cc2OCC)/C=N/NC(=O)CSc3nnc(s3)C                                                           |
| 1260 | CCN(CC)c1ccc(cc1)n2nc3cc(c(cc3n2)NC(=O)c4cc(c(c4)OCC)OCC)OCC)OCC)C                                                     |
| 1261 | CCOC(=O)CC[C@]2[C@@H](C(=O)OCC)NC(=O)c1ccc(cc1)NCc2nc3c(n2C)c(=O)n(c(=O)n3C)C                                          |
| 1262 | CC[NH+](CC)CCN1[C@H]([C@@H](C(=O)C1=O)C(=O)c2ccc3c(c2)C[C@H](O3)C)c4ccc(c(c4)OCC)OCC=C                                 |
| 1263 | CC[C@]2[C@@H](c1nnnn1Cc2ccc2)N(Cc3ccccc3OC)Cc4cc5cc(ccc5[nH]c4=O)OCC                                                   |
| 1264 | Cc1cc(c(c1OC(=O)C)C)OC[C@H](CNCCNC(=O)c2ccc(c(c2)S(=O)(=O)N)Cl)O                                                       |
| 1265 | CCN(CC)S(=O)(=O)c1ccc(cc1)C(=O)C2=C(C(=O)N([C@H]2c3ccc(cc3)C(C)C)CCOC)O                                                |
| 1266 | CCCOc1ccc(cc1)[C@@H]2C(=C(C(=O)N2CCC[NH+](CC)C)[O-])C(=O)c3cnn(c3C)c4ccccc4                                            |
| 1267 | CCN(CC)CCOC(=O)c1ccc(cc1)NC(=O)c2cc3c(nn(c3s2)C)c4ccc(c(c4)OC)OC                                                       |
| 1268 | CCCOc1ccc(cc1)C(=O)C2=C(C(=O)N([C@H]2c3ccccc3)OCCC(C)C)CCN4cc[nH+]c4)[O-]                                              |
| 1269 | CCCOc1ccc(cc1OCC)[C@H]2C(=C(C(=O)N2CCC[NH+](C)C)[O-])C(=O)c3c(n4cccc(c4n3)C)C                                          |
| 1270 | CCOc1cc(ccc1OCC=C)[C@@H]2C(=C(C(=O)N2CCC[NH+](C)C)[O-])C(=O)c3c(nc(s3)C)C                                              |
| 1271 | CCCCCOc1ccc(cc1OC)[C@H]2C(=C(C(=O)N2CCC[NH+](C)C)[O-])C(=O)c3c(nc(s3)C)C                                               |
| 1272 | CC[NH+](CC)CCN1[C@]2[C@@H](C(=C(C1=O)[O-])C(=O)c2c(nc(s2)C)C)c3ccc(c(c3)OC)OCCC(C)C                                    |
| 1273 | CCOc1ccc(cc1)CN(C[C@H]2CCCO2)[C@@H](c3cc4cc(ccc4[nH]c3=O)C)c5nnnn5CCOC                                                 |
| 1274 | CC[C@H](c1nnnn1C[C@H]2CCCO2)N(Cc3ccccc3OC)Cc4cc5cc(ccc5[nH]c4=O)OCC                                                    |
| 1275 | CCCN(CCC)S(=O)(=O)c1ccc(cc1)C(=O)N(CC[NH+](C)C)c2nc3c(cccc3s2)OCC                                                      |
| 1276 | CC[NH+](CC)CCCN1[C@]2[C@@H](C(=C(C1=O)[O-])C(=O)c2cnn(c2C)c3ccccc3)c4ccc(cc4)OCC=C                                     |
| 1277 | CCOc1ccc(cc1)CC(=O)N/N=C/C(=N/NC(=O)Cc2ccc(cc2)OCC)/[C@@H]([C@@H]([C@@H](CO)O)O)[O-]                                   |
| 1278 | C[NH+](C)CCCN(c1nc2cc(ccc2s1)OC)C(=O)c3ccc(cc3)S(=O)(=O)N(CC=C)CC=C                                                    |
| 1279 | CCN(CC)CCNc1nc2c(n1C)c(=O)n(c(=O)n2C)CCOC(=O)c3cc(c(c3)OC)OC)OC                                                        |
| 1280 | CCOc1ccc(cc1)CC(=O)N/N=C/C(=N/NC(=O)Cc2ccc(cc2)OCC)/[C@H]([C@H]([C@@H](CO)O)O)[O-]                                     |
| 1281 | CCCOc1ccc(cc1OC)[C@]2c3c(n[nH]c3C(=O)N2CCCN4CCOCC4)c5ccc(cc5)OC                                                        |



|      |                                                                                                      |
|------|------------------------------------------------------------------------------------------------------|
| 1282 | CCOc1cc(ccc1OC(=O)CCCOc2ccc(cc2)C(C)(C)C)/C=C(\C#N)/C(=O)NCc3ccco3                                   |
| 1283 | CCOc1ccc2c(c1)cc(c(=O)[nH]2)CN(Cc3ccccc3OC)[C@H](c4nnnn4Cc5ccco5)C(C)C                               |
| 1284 | Cc1ccc2cc(c(=O)[nH]c2c1)CN(CCc3ccc(c(c3)OC)OC)Cc4nnnn4Cc5ccccc5                                      |
| 1285 | CC[C@H](c1nnnn1Cc2ccco2)N(CCc3ccc(c(c3)OC)OC)Cc4cc5ccco(c5[nH]c4=O)C                                 |
| 1286 | CCOc1ccc(cc1OCC)CCNC(=S)N(Cc2cc(c(c2)OC)OC)OC)C[C@H]3CCCO3                                           |
| 1287 | CCOC(=O)c1ccc(cc1)NC(=O)CSc2nnc(n2CC=C)CCCOc3ccc(cc3C)Cl                                             |
| 1288 | CCCN1c2ccc(cc2/C(=N\O[C@H]3[C@H]([C@H]([C@H]([C@H]([C@H](O3)COC(=O)C)OC(=O)C)OC(=O)C)NC(=O)C)/C1=O)C |
| 1289 | CC(=O)N[C@H]1[C@H]([C@H]([C@H]([C@H]([C@H]([C@H]1OC(=O)COc2ccc(cc2Cl)Cl)COC(=O)C)OC(=O)C)OC(=O)C     |
| 1290 | CCCCN(CCCC)S(=O)(=O)c1ccc(cc1)C(=O)Nc2nnc(o2)Cc3ccc(cc3)SCC                                          |
| 1291 | CCOc1cc(cc(c1[O-])[N+](=O)[O-])[C@H]2C3=C(C[C@H]([C@H]([C3=O)C(=O)OC)C)NC(=C2C(=O)OCCSCC)C           |
| 1292 | CC1(CC(=O)[C@H](C(=O)[C@H]1C(=O)OC)/C=N\CCCCCN/C=C/2\C(=O)CC([C@H](C2=O)C(=O)OC)(C)C)C               |
| 1293 | [H]/N=C(\NCCC[C@H](C(=O)[O-])NC(=O)OC(C)(C)C)/NS(=O)(=O)c1c(c2c(c1C)CCC(O2)(C)C)C                    |
| 1294 | [H]/N=C(/NCCC[C@H](C(=O)[O-])NC(=O)OCC1c2ccccc2-c3c1ccc3)\NS(=O)(=O)c4c(cc(c4C)C)OC)C                |
| 1295 | CCN(CC)S(=O)(=O)c1ccc(cc1)NC(=O)COC(=O)Cc2ccc(cc2)OCc3c(noc3C)C                                      |
| 1296 | CC[NH+](CC)CCCN1[C@H](C(=C(C1=O)[O-])C(=O)c2ccc3c(c2)C[C@H](O3)C)c4ccc(c4)OCC)OCC=C                  |
| 1297 | [H]/N=C1/C(=C\c2cc(c(c2)OC)OCCOc3ccccc3C)OC)/C(=O)N=C4N1N=C(S4)CCCC                                  |
| 1298 | CCCCN(C)S(=O)(=O)c1ccc(cc1)C(=O)Nc2nnc(o2)c3cc(c(c3)OCC)OCC)OCC                                      |
| 1299 | CC(=O)N[C@H]1[C@H]([C@H]([C@H]([C@H]([C@H]1Oc2c3ccccc3ccc2C(=O)OC)COC(=O)C)OC(=O)C)OC(=O)C           |
| 1300 | CCC(=O)Nc1nnc(s1)SCc2cc(=O)c(co2)OC(=O)c3cc(c(c3)OCC)OCC)OCC                                         |
| 1301 | CCC(CC)C(=O)Nc1nnc(s1)SCc2cc(=O)c(co2)OC(=O)c3ccc(c(c3)OCC)OCC                                       |
| 1302 | CCOCCCN(CC(=O)N(Cc1ccccc1)Cc2c(ccs2)C)C(=O)Nc3cc(cc3)OC)OC                                           |
| 1303 | COCCN(CC(=O)N(CCc1ccc(c(c1)OC)OC)Cc2cccs2)C(=O)Nc3ccccc3)OC                                          |
| 1304 | CC(C)CCOc1ccc(cc1OC)[C@H]2C(=C(C(=O)N2CCC[NH+](C)C)[O-])C(=O)c3ccc4c(c3)OCCO4                        |
| 1305 | COc1ccc(cc1)c2nnc(n2c3ccc(cc3)OC)SCC(=O)N/N=C/c4ccccc4OCC(=O)[O-]                                    |
| 1306 | CCCOc1ccc(cc1)C(=O)Oc2ccc(cc2)/C=N/NC(=O)CSc3nnc(n3c4ccccc4)C                                        |
| 1307 | Cc1ncc(n1CCOC(=O)N[C@H](C(Cl)(Cl)Cl)[NH+](Cc2ccccc2)Cc3ccccc3)[N+](=O)[O-]                           |
| 1308 | CCOCCCN([C@H](c1ccc(cc1)O)C(=O)NC(C)(C)C)C(=O)Cn2nc(nn2)c3ccc(cc3)Cl                                 |
| 1309 | CCOc1ccc(cc1)C[NH+](Cc2ccco2)[C@H](c3cc4ccc(cc4[nH]c3=O)C)c5nnnn5CCOC                                |
| 1310 | CCOC(=O)c1ccccc1NC(=O)Cn2c3ccccc3c(=O)n(c2=O)CCC(=O)NCc4ccccc4OC                                     |
| 1311 | CC/C=C(\c1csc(n1)N)/C(=O)N[C@H]2[C@H]3N(C2=O)C(=C(CS3)COC(=O)N)C(=O)OCOC(=O)C(C)(C)C                 |
| 1312 | CCc1ccc(cc1)N([C@H](c2ccc(cc2)OC)C(=O)NC(C)(C)CC)C(=O)CCC(=O)Nc3cc(on3)C                             |
| 1313 | CC[NH+](CC)CCCN1[C@H](/C(=C(/c2ccc(c2)Cl)OCC)\O)/C(=O)C1=O)c3cc(ccc3OC)OC                            |
| 1314 | CC(C)(C)NC(=O)c1ccc(cc1)NC(=O)CCCCCCCC(=O)Nc2ccc(cc2)C(=O)NC(C)(C)C                                  |
| 1315 | CCCN1C(=O)c2c([nH+]cn2C[C@]1(C)C(=O)NCCC(C)C)C(=O)NCc3cc(c(c3)OC)OC)OC                               |
| 1316 | CC[NH+][1]CCN(CC1)c2ccc(cc2Cl)NC(=S)NC(=O)c3cc(c(c3)OCC)OCC)OCC                                      |
| 1317 | CCCOc1ccc(cc1OC)[C@H]2C(=C(c3ccc(cc3)OCC)O)C(=O)C(=O)N2CCC[NH+](CC)CC                                |
| 1318 | CC[NH+](CC)CCN1[C@H](/C(=C(/c2ccc3c(c2)C[C@H](O3)C)\O)/C(=O)C1=O)c4ccc(c4)OCC)OCC=C                  |
| 1319 | CC(C)(C)NC(=O)c1ccccc1)NC(=O)CCCCCCCC(=O)Nc2ccc(cc2)C(=O)NC(C)(C)C                                   |

|      |                                                                                                   |
|------|---------------------------------------------------------------------------------------------------|
| 1319 | <chem>Cc1cc(c(c(c1OC(=O)C)C)C)OC[C@H](C[NH2+])CCNC(=O)c2ccc(c(c2)S(=O)(=O)N)Cl)O</chem>           |
| 1320 | <chem>Cc1ccc(cc1)C(=O)N/C(=C/c2ccc(cc2)OCCOc3ccccc3OC)/C(=O)NCCC[NH+](C)C</chem>                  |
| 1321 | <chem>CC(C)Cn1c(c(c(=O)[nH]c1=O)N(CC(C)C)C(=O)CN(C)C(=O)COc2ccc(cc2OC)C(=O)C)N</chem>             |
| 1322 | <chem>CCn1cc(c2c1cccc2)/C=C(\C(=O)NCCCN3ccnc3)/NC(=O)c4cc(c(c4)OC)OC)OC</chem>                    |
| 1323 | <chem>CC[NH+](CC)CCCN1[C@H](C(=C(C1=O)O)C(=O)c2cnn(c2C)c3ccccc3)c4cccc(c4)OCC=C</chem>            |
| 1324 | <chem>CC[NH+][1]CCN(CC1)c2c(c([nH+]n2c3ccccc3)C)CN(CCCOC)C(=O)c4cc(cc4)OC)OC</chem>               |
| 1325 | <chem>CC[NH+](CC)CCN1[C@H](C(=C(C1=O)O)C(=O)c2c(nc3n2ccccc3)C)c4ccc(c(c4)OCC)OCC=C</chem>         |
| 1326 | <chem>CC[NH+](CC)CCN(CC(=O)N1CCN(CC1)c2ccc(n[nH+]2)c3ccc(cc3OC)OC)C(=O)COC</chem>                 |
| 1327 | <chem>Cc1c(c(n1)c2ccccc2)Oc3ccccc3OC)C[NH+](CCOC)C[C@H](COCc4ccccc4)O</chem>                      |
| 1328 | <chem>CC[C@H](c1nnnn1C[C@H]2CCCO2)[NH+](CCc3ccccc3)C)Cc4cc5cc(ccc5[nH]c4=O)OCC</chem>             |
| 1329 | <chem>CC[C@H](c1nnnn1C[C@H]2CCCO2)[NH+](Cc3ccccc3OC)Cc4cc5cc(ccc5[nH]c4=O)OCC</chem>              |
| 1330 | <chem>Cc1cccc(c1C)OCCCN2c3ccccc3[nH+]c2CCNC(=O)c4cc(c(c4)OC)OC)OC</chem>                          |
| 1331 | <chem>Cc1ccc(c(c1)C)OCCCN2c3ccccc3[nH+]c2CCNC(=O)c4cc(c(c4)OC)OC)OC</chem>                        |
| 1332 | <chem>COc1ccc(cc1)OCCCN2c3ccccc3[nH+]c2CCNC(=O)c4cc(c(c4)OC)OC)OC</chem>                          |
| 1333 | <chem>C[C@H](c1[nH+]c2ccccc2n1CCCCOc3ccccc3OC)NC(=O)c4cc(c(c4)OC)OC)OC</chem>                     |
| 1334 | <chem>CCCCOc1ccc(cc1OCC)[C@H]2c3c([nH]nc3C(=O)N2CCCN4cc[nH+]c4)c5ccc(cc5)OC</chem>                |
| 1335 | <chem>CCOC(=O)Cn1c(nnn1)C[NH+](CCc2ccc(c2)OC)OC)Cc3cc4cc(ccc4[nH]c3=O)OC</chem>                   |
| 1336 | <chem>CC(C)(C)n1c(nnn1)C[NH+](CCc2ccc(c2)OC)OC)Cc3cc4cc(c(cc4[nH]c3=O)OC)OC</chem>                |
| 1337 | <chem>CC[C@H](c1nnnn1Cc2ccco2)[NH+](CCc3ccc(c3)OC)OC)Cc4cc5ccc(cc5[nH]c4=O)C</chem>               |
| 1338 | <chem>CC[C@H](c1nnnn1Cc2ccco2)[NH+](CCc3ccc(c3)OC)OC)Cc4cc5ccccc5[nH]c4=O)C</chem>                |
| 1339 | <chem>CC/C=C(\c1csc(n1)N)/C(=O)N[C@H]2[C@H]3N(C2=O)C(=C(CS3)COC(=O)N)C(=O)OCOC(=O)C(C)(C)C</chem> |
| 1340 | <chem>Cc1c(c([nH]c1C(=O)OC)C(=O)C2=C(C(=O)N([C@H]2c3cc(c(c3)OC)OC)OC)CCC[NH+](C)C)[O-]</chem>     |
| 1341 | <chem>CC1(CC(=O)C(=C([C@H]1C(=O)OC)O)/C=N/CCCCCN/C=C/2(C(=O)CC([C@H](C2=O)C(=O)OC)(C)C)C</chem>   |
| 1342 | <chem>CC[C@H](C[NH+]1CCCC1)(C(=O)NC(=O)NC(=O)[C@H](CC)(C[NH+]2CCCC2)C(=O)OCC)C(=O)OCC</chem>      |
| 1343 | <chem>CCCN(CCC)S(=O)(=O)c1ccc2c(c1)c(cn2CC)/C=N\NC(=S)Nc3ccccc3OCC</chem>                         |
| 1344 | <chem>Cc1ccc(c(c1)OCC(=O)NNC(=O)CCCCCCC(=O)NNC(=O)COc2cc(ccc2C)C)C</chem>                         |
| 1345 | <chem>Cc1ccccc1[NH+]2CCN(CC2)C[C@H](COc3ccc(cc3)OC[C@H](CN4CC[NH+](CC4)c5ccccc5C)O)O</chem>       |
| 1346 | <chem>CCOC(=O)[C@H](c1ccc(c(c1)C)N[C@H](c2ccc(cc2)OC)P(=O)(OCC)OCC)(C(F)(F)F)O</chem>             |
| 1347 | <chem>CCCCOc1ccc(cc1)C(=O)NCc2nnc(n2c3ccccc3)SCC(=O)Nc4nnc(s4)C</chem>                            |
| 1348 | <chem>CC(C)OCCCN(C(=O)C(=O)N/N=C/c1ccc(c(c1)OC)OCC(=O)Nc2ccc(cc2Cl)Cl</chem>                      |
| 1349 | <chem>CCOc1ccc(cc1)CNc2nc(n2)S(=O)(=O)c3ccc(cc3)Cl)NCc4ccc(cc4)OCC</chem>                         |
| 1350 | <chem>c1ccc(cc1)N2CCN(CC2)C[C@H](COc3ccc(cc3)OC[C@H](CN4CCN(CC4)c5ccccc5)O)O</chem>               |
| 1351 | <chem>CC[C@H](C(=O)NCc1cccnc1)Sc2nc3cc(ccc3c(=O)n2Cc4ccco4)C(=O)NCCOC</chem>                      |
| 1352 | <chem>CC[C@H](C(=O)NCc1ccc[nH+]c1)Sc2nc3cc(ccc3c(=O)n2Cc4ccco4)C(=O)NCCOC</chem>                  |
| 1353 | <chem>CCCCOCc1ccc(cc1)C(=O)Oc2ccc(cc2OC)/C=N/NC(=O)CNC(=O)c3ccc(cc3)Cl</chem>                     |
| 1354 | <chem>CCCCCCCCN1C(=O)/C(=C/c2c(nc3c(cccn3c2=O)C)NCCCN4cc[nH+]c4)/SC1=S</chem>                     |
| 1355 | <chem>CCN(CC)CCCOc1ccc(cc1)/C=C/C(=O)Nc2ccc(c(c2)Nc3nccc(n3)c4ccnc4)C</chem>                      |

|      |                                                                                              |
|------|----------------------------------------------------------------------------------------------|
| 1356 | <chem>CCOc1cc(ccc1OC(=O)c2ccc(cc2Cl)Cl)/C=N/NC(=S)Nc3ccc(cc3)OC</chem>                       |
| 1357 | <chem>CCN(CC)C(=O)c1c(c(c(s1)NC(=S)N[C@@H](C)c2ccc(cc2)C(C)(C)C(=O)OC)C</chem>               |
| 1358 | <chem>CCOc1cc(cc(c1OCC)OCC)C(=O)NC(=S)Nc2ccc(c(c2)Cl)N3CCCC3</chem>                          |
| 1359 | <chem>CCOc1cc(cc(c1OCC)OCC)C(=O)NCC(=O)N/N=C/c2ccc(cc2Cl)Cl</chem>                           |
| 1360 | <chem>CCCNc1c2cnn(c2nc(n1)SCC)CCNC(=O)C(C)(C)Oc3ccc(cc3)Cl</chem>                            |
| 1361 | <chem>CC(C)(C)c1ccc(c(c1)NC(=O)COC(=O)CCNS(=O)(=O)c2ccc(cc2)Cl)OC</chem>                     |
| 1362 | <chem>CCCCOc1ccc(cc1C(=O)NC(=S)Nc2cccc(c2)OC[C@@H]3CCCCO3)Br</chem>                          |
| 1363 | <chem>CC[C@H](C)Oc1ccc(cc1)NC(=S)NC(=O)c2cc(ccc2OCCOC)Br</chem>                              |
| 1364 | <chem>CCC[C@@H](C(=O)NC(C)(C)C)N(C[C@@H]1CCCO1)C(=O)CNS(=O)(=O)c2ccc(cc2)Cl</chem>           |
| 1365 | <chem>CCCCOc1ccc(cc1Br)C(=O)NNC(=O)COc2cccc2[C@@H](C)CC</chem>                               |
| 1366 | <chem>CCCCOc1ccc(cc1Br)C(=O)NNC(=O)CCCOc2ccc(cc2Cl)Cl</chem>                                 |
| 1367 | <chem>CCCCCOc1ccc(cc1Br)C(=O)NNC(=O)COc2cccc2C(C)C</chem>                                    |
| 1368 | <chem>CCCCCOc1ccc(cc1Br)C(=O)NNC(=O)COc2ccc(cc2)Cl</chem>                                    |
| 1369 | <chem>CCCCCOc1ccc(cc1C(=O)NNC(=O)COc2ccc(cc2)Cl)Br</chem>                                    |
| 1370 | <chem>CCCCCOc1ccc(cc1C(=O)NC(=S)Nc2ccc(c(c2)[N+](=O)[O-])Cl)Br</chem>                        |
| 1371 | <chem>CCCCOc1ccc(cc1C(=O)NNC(=O)COc2cccc2[C@@H](C)CC)Br</chem>                               |
| 1372 | <chem>CC[C@@H](C)c1cccc1OCC(=O)NNC(=O)c2ccc(c(c2)Br)OCCOC</chem>                             |
| 1373 | <chem>CCCCCOc1ccc(cc1)C(=O)NNC(=O)COc2ccc(cc2C(C)(C)C)Br</chem>                              |
| 1374 | <chem>CCN(CC)C(=O)c1cccc(c1)NC(=S)NC(=O)c2cc(ccc2OCCC(C)C)Br</chem>                          |
| 1375 | <chem>CCCN(CCC)S(=O)(=O)c1ccc2c(c1)c(cn2C)/C=N/NC(=S)Nc3cccc3CC</chem>                       |
| 1376 | <chem>CC[C@H](C)c1ccc(cc1)NC(=O)CCSc2nnc(n2c3cccc3)CNc4cccc4</chem>                          |
| 1377 | <chem>CC[C@H](C)NS(=O)(=O)c1ccc(cc1)NC(=O)CSc2nnc(n2CC=C)C(F)(F)F</chem>                     |
| 1378 | <chem>CCCCN(CC)C(=O)c1cc(ccc1N2CCNCC2)NS(=O)(=O)c3ccc(cc3)CCC</chem>                         |
| 1379 | <chem>c1cc(ccc1[C@@H]2CCC=C2)OC[C@H](CN3CCN(CC3)C[C@@H](COc4ccc(cc4)[C@@H]5CCC=C5)O)O</chem> |
| 1380 | <chem>c1cc(ccc1[C@@H]2CCC=C2)OC[C@H](CN3CCN(CC3)C[C@H](COc4ccc(cc4)[C@@H]5CCC=C5)O)O</chem>  |
| 1381 | <chem>CCC(C)(C)c1ccc(cc1)Oc2ccc(cc2)NC(=O)COC(=O)CNC(=O)c3ccc(c(c3)C)C</chem>                |
| 1382 | <chem>CCCCCCC(=O)N[C@@H]([C@@H](C)CC)C(=O)Nc1nnc(s1)c2cccc(c2)Br</chem>                      |
| 1383 | <chem>CC(C)COC[C@H](C[NH+](Cc1nc(c2c(csc2n1)c3cccc3OC)[O-])C4CCCC4)O</chem>                  |
| 1384 | <chem>CCCCNC(=O)[C@@H](c1cc2cccc2c3c1cccc3)N(CCC)C(=O)CNC(=O)c4cccc4</chem>                  |
| 1385 | <chem>CCCCNC(=O)[C@H](c1cc2cccc2c3c1cccc3)N(CCC)C(=O)CNC(=O)c4cccc4</chem>                   |
| 1386 | <chem>CCCCOc1ccc(cc1)[C@@H]2c3c(n[nH]c3C(=O)N2CCOC)c4cc(cc(c4O)C)C</chem>                    |
| 1387 | <chem>CCCCOc1ccc(cc1)[C@H]2c3c(n[nH]c3C(=O)N2CCOC(C)C)c4cc(cc(c4O)C)Cl</chem>                |
| 1388 | <chem>CCCCOc1ccc(cc1)[C@H]2c3ccc(cc3OC(=C2C#N)N)OC(=O)COc4cccc(c4C)C</chem>                  |
| 1389 | <chem>CCCCOc1ccc(cc1OCC)[C@@H]2c3c(n[nH]c3C(=O)N2CC=C)c4c(cc(cc4O)C)C</chem>                 |
| 1390 | <chem>CCCCOc1ccc(cc1OCC)[C@H]2c3c(n[nH]c3C(=O)N2CC=C)c4c(cc(cc4O)C)C</chem>                  |
| 1391 | <chem>CCOc1cc(c(cc1NC(=O)CCOC2ccc(cc2)Cl)OCC)NC(=O)c3cccc3</chem>                            |
| 1392 | <chem>CCCCOc1cccc(c1)[C@H]2C(=C(Nc3n2nc(n3)SCCC)C)C(=O)Nc4cccc4</chem>                       |
| 1392 | <chem>CCc1cccc(c1)N/C(=N/C(=O)c2ccc(c(c2)OCC)OCC)/NCc3c(nn(c3C)C)C</chem>                    |

|      |                                                                                                                   |
|------|-------------------------------------------------------------------------------------------------------------------|
| 1393 | <chem>COc1ccc(c(c1)OC)NC(=S)Nc2cc(cc(c2)OCC(F)(F)F)OCC(F)(F)F</chem>                                              |
| 1394 | <chem>CCCCOc1ccc(cc1)NC(=O)CSc2ccc(cc2)NC(=O)c3c(cccc3OC)OC</chem>                                                |
| 1395 | <chem>COC(=O)c1ccccc1NC(=O)CSc2nnc(n2CC=C)CNc3cccc4c3cccc4</chem>                                                 |
| 1396 | <chem>COc1ccc(c(c1)OC)NC(=S)NCCcn2c(c(c(n2)C(F)(F)F)Br)C3CC3</chem>                                               |
| 1397 | <chem>CCC[N+](=O)C(S/C(=C/c2ccc(cc2OCC)[NH+](CC)CC)/C1=O)Nc3ccc(cc3)OCC</chem>                                    |
| 1398 | <chem>CCCCOc1ccc(cc1)C(=O)Nc2ccc(cc2)c3nnc(n3C)SCC(=O)NC4CC4</chem>                                               |
| 1399 | <chem>CC(C)CCOc1cccc(c1)[C@@H]2c3c([nH]nc3C(=O)N2CCOC(C)C)c4cc(ccc4O)Cl</chem>                                    |
| 1400 | <chem>CCOc1ccc(cc1)[C@H](CCC(=O)N/N=C\c2cc(c(c(c2)Br)OCC=C)OC)O</chem>                                            |
| 1401 | <chem>Cc1cc(nc(n1)NS(=O)(=O)c2ccc(cc2)NC(=O)C(C(C(C(C(C(C(F)(F)F)(F)F)(F)F)(F)F)(F)F)(F)F)(F)F)(F)F)(F)F)C</chem> |
| 1402 | <chem>Cc1ccc(cc1)NC2=C(C(=O)N(C2=O)CCCOC)Sc3ccc(cc3)NC(=O)CC(C)C</chem>                                           |
| 1403 | <chem>COCCCN(Cc1[nH]c(=O)c2c(csc2n1)c3ccc(cc3)OC)C[C@H](Cc4cccc4)O</chem>                                         |
| 1404 | <chem>CCOc1ccc(cc1)C(=O)Oc2ccc(cc2OCC)/C=N/NC(=O)CNC(=O)c3ccc(cc3)C</chem>                                        |
| 1405 | <chem>CCN(CC)S(=O)(=O)c1cccc(c1)c2nnc(n2N)SCC(=O)c3cc(n(c3C)CCOC)C</chem>                                         |
| 1406 | <chem>CCOC(=O)[C@](C(F)(F)F)(NC(=O)Nc1ccc(cc1)S(=O)(=O)Nc2ccc(nn2)OC)OCC</chem>                                   |
| 1407 | <chem>CCc1ccc(cc1)OCC(=O)N[C@@H](C(Cl)(Cl)Cl)NC(=S)Nc2ccc(cc2)C(=O)OC</chem>                                      |
| 1408 | <chem>CCN(CC)S(=O)(=O)c1ccc(cc1)C(=O)NCCn2c3c(cn2)c(nc(n3)SC)NCC(C)C</chem>                                       |
| 1409 | <chem>CCOc1ccc(cc1)C(=O)NCCn2cc(c3c2cccc3)SCC(=O)Nc4cccc4OCC</chem>                                               |
| 1410 | <chem>CCCCOCc1ccc(cc1)C(=O)OCC(=O)N(CCOC)c2c(n(c(=O)[nH]c2=O)CC(C)C)N</chem>                                      |
| 1411 | <chem>CCCCOc1ccc(cc1Br)C(=O)NC(=S)Nc2ccc(cc2)C(=O)NCCOC</chem>                                                    |
| 1412 | <chem>CCCCOc1ccc(cc1C(=O)NC(=S)Nc2ccc(cc2)C(=O)NCCOC)Br</chem>                                                    |
| 1413 | <chem>CC[C@H](C)c1ccc(cc1)OCC(=O)NNC(=S)NC(=O)CCCOc2ccc(cc2Cl)Cl</chem>                                           |
| 1414 | <chem>CC[C@H](C)c1ccc(cc1)OCC(=O)NNC(=S)NC(=O)CCCOc2ccc(cc2Cl)Cl</chem>                                           |
| 1415 | <chem>CCCN(S(=O)(=O)c1ccc(cc1)NC(=S)NC(=O)C2ccc(c(c2)Br)OC</chem>                                                 |
| 1416 | <chem>CCCCCOc1ccc(cc1)C(=O)NC(=S)Nc2ccc(cc2)S(=O)(=O)N(C)c3cccc3</chem>                                           |
| 1417 | <chem>CCCCCOc1ccc(cc1)C(=O)NC(=S)Nc2ccc(cc2)S(=O)(=O)Nc3c(cccc3C)C</chem>                                         |
| 1418 | <chem>CCCCCOc1cccc1C(=O)Nc2ccc(cc2)S(=O)(=O)Nc3cc(nc(n3)OC)OC</chem>                                              |
| 1419 | <chem>CCCCCOc1cccc1C(=O)NC(=S)NNC(=O)COc2ccc(cc2C)Br</chem>                                                       |
| 1420 | <chem>CCCCCOc1cccc1C(=O)NC(=S)NNC(=O)COc2ccc(cc2)C(=O)OCCC</chem>                                                 |
| 1421 | <chem>CCCCCOc1cccc1C(=O)NC(=S)Nc2ccc(cc2)S(=O)(=O)NC3CCCC3</chem>                                                 |
| 1422 | <chem>CCCCCOc1cccc1C(=O)NC(=S)Nc2ccc(cc2)S(=O)(=O)N(CC)c3cccc3</chem>                                             |
| 1423 | <chem>CCCCCOc1ccc(cc1Br)C(=O)NC(=S)NNC(=O)COc2cccc(c2)C</chem>                                                    |
| 1424 | <chem>CCCOc1ccc(cc1C(=O)NC(=S)NNC(=O)COc2ccc(cc2)[C@@H](C)CC)Br</chem>                                            |
| 1425 | <chem>CCCC(=O)Nc1ccc(cc1)NC(=O)CCCCCCC(=O)Nc2ccc(cc2)NC(=O)CCC</chem>                                             |
| 1426 | <chem>CCOc1cc(cc(c1OCC)OCC)C(=O)NC(=S)Nc2ccc(cc2)Nc3ccc(cc3)OC</chem>                                             |
| 1427 | <chem>c1ccc(cc1)OCCOc2cccc(c2)C(=O)NC(=S)Nc3ccc(cc3)C(=O)NCCc4cccc4</chem>                                        |
| 1428 | <chem>CCCC[NH+](CCCC)CCNC(=O)c1cc(nc2c1cc(cc2)S(=O)(=O)N3CCCC[C@@H]3C)[O-]</chem>                                 |
| 1429 | <chem>COc1cc(cc(c1)OC)NC(=O)CCSc2nnc(n2CC=C)CNc3cccc4c3cccc4</chem>                                               |

|      |                                                                                                                |
|------|----------------------------------------------------------------------------------------------------------------|
| 1430 | CC[C@H](C)Sc1nnc(s1)NC(=O)CSc2nc([nH]n2)N/N=C/c3ccc(cc3)C(=O)OC                                                |
| 1431 | CCN(CC)c1ccc(cc1)/C=N/Nc2[nH]nc(n2)SCC(=O)NC(c3cccc3)c4cccc4                                                   |
| 1432 | COCCCN(Cc1[nH]c(=O)c2cc(c(cc2n1)OC)OC)Cc3[nH]c(=O)c4cc(c(cc4n3)OC)OC                                           |
| 1433 | CCCCOc1ccc(cc1)C(=O)N/C(=C/c2ccc(cc2)N(C)C)/C(=O)Nc3ccc(cc3)C(=O)OC                                            |
| 1434 | CCCCCOc1cccc1C(=O)NC(=S)Nc2ccc(cc2)S(=O)(=O)Nc3cccc3                                                           |
| 1435 | CCCCNc1c(c(=O)n2cc(ccc2n1)C)/C=C/3\C(=O)N(C(=S)S3)CCCCC(=O)O                                                   |
| 1436 | CCCCOc1cccc(c1)[C@H]2c3ccc(cc3OC(=C2C#N)N)OC(=O)COc4cccc4OC                                                    |
| 1437 | CCCOc1ccc(cc1OCC)[C@H]2c3c(n[nH]c3C(=O)N2CCOC)C4cc(cc(c4O)C)C                                                  |
| 1438 | CCCOc1ccc(cc1OCC)[C@H]2c3c(n[nH]c3C(=O)N2CCOC(C)C)C4cc(cc(c4O)C)C                                              |
| 1439 | CCOc1cc(ccc1OCCC(C)C)[C@H]2c3c(n[nH]c3C(=O)N2CCOC)C4c(cc(cc4O)C)C                                              |
| 1440 | C=CCSc1cccc1NC(=O)CSc2nc([nH]n2)N/N=C/c3ccc(c3)Oc4cccc4                                                        |
| 1441 | CC(C)OC(=O)c1cc(cc(c1)NC(=S)Nc2c(c3c(s2)CCCC3)C(=O)OC)C(=O)OC(C)C                                              |
| 1442 | CC(C)CSc1nnc(s1)NC(=O)CSc2nc([nH]n2)N/N=C/c3cc(ccc3OC)OC                                                       |
| 1443 | CCOc1cc(cc(c1OCC)OCC)C(=O)NC(=S)NCc2ccc(cc2)c3nc4cccc4o3                                                       |
| 1444 | CC[NH+](CC)c1ccc(cc1)/C=N/NC(=O)c2c(non2)C(=O)N/N=C/c3ccc(cc3)N(CC)CC                                          |
| 1445 | CCCCOc1ccc(cc1OC)[C@H]2c3c(n[nH]c3C(=O)N2CCOC)C4cc(ccc4O)Cl                                                    |
| 1446 | CCOc1ccc(cc1)[C@H](CCC(=O)N/N=C/c2cc(c(c2)Br)OCC#N)OCC)O                                                       |
| 1447 | Cc1c2c(=O)[nH]c(nc2sc1C(=O)OC(C)C)CN(CC=C)C[C@H](COc3ccc(cc3)Cl)O                                              |
| 1448 | Cc1c(c(n1)c2cccc2)O)C(=O)CCCCCCCC(=O)c3c(nn(c3O)c4cccc4)C                                                      |
| 1449 | CCOC[C@H](CN(CCN1CCOCC1)Cc2[nH]c(=O)c3c(csc3n2)c4cccc(c4)OC)O                                                  |
| 1450 | CC[NH+](CC)c1ccc(cc1)/C=N/NC(=O)c2ccc(o2)C(=O)N/N=C/c3ccc(cc3)N(CC)CC                                          |
| 1451 | CCOc1ccc(cc1OCC)C/C(=N)OC(C(F)(F)F)(C(F)(F)F)NC(=O)c2cccc(c2)C)/N                                              |
| 1452 | CC[NH+](CC)c1ccc(cc1)/C=N/Nc2c(nc3cccc3n2)N/N=C/c4ccc(cc4)N(CC)CC                                              |
| 1453 | CC(=O)O[C@H]1[C@H](O[C@H]([C@H]([C@H]([C@H]1OC(=O)C)OC(=O)C)OC)COC(c2cccc2)(c3cccc3)c4cccc4                    |
| 1454 | CCCCOc1ccc(cc1)C(=O)[C@H]2[C@H](N(C(=O)C2=O)c3nc(c(s3)C(=O)OC)C)c4ccc(c(c4)OC)OC                               |
| 1455 | CCOCCOC(=O)C1[C@H](C2C(=NC1=C)C[C@H](CC2=O)c3ccc(c(c3)OC)OC)c4cc(c(cc4Br)OC)OC                                 |
| 1456 | CCOc1cccc2c1N(C(C3=C2C4(C=C(S3)C(=O)OC)C(=O)OC)SC(=C(S4)C(=O)OC)C(=O)OC)(C)C(=O)COc5cccc5                      |
| 1457 | CCOc1ccc2c(c1)C3=C(C(N2C(=O)COc4ccc(cc4)F)(C)C)SC(=C(C35SC(=C(S5)C(=O)OC)C(=O)OC)C(=O)OC)C(=O)OC               |
| 1458 | CC(=O)OC[C@H]1[C@H]([C@H]([C@H]([C@H]([C@H]1O1)SC2=N/C(=C/c3cccs3)/C(=O)N2c4ccc(cc4)Cl)OC(=O)C)OC(=O)C)OC(=O)C |
| 1459 | CC(=O)OC[C@H]1[C@H]([C@H]([C@H]([C@H]([C@H]1O1)SC2=N/C(=C/c3cccs3)/C(=O)N2c4ccc(cc4)OC)OC(=O)C)OC(=O)C)OC(=O)C |
| 1460 | C/C(=N)CCCCC/N=C(\C)/C1C(=O)OC(=N1)c2ccc(cc2)Cl)/C3C(=O)OC(=N3)c4ccc(cc4)Cl                                    |
| 1461 | CCOCCOC(=O)C1[C@H](C2C(=NC1=C)C[C@H](CC2=O)c3ccc(c(c3)OC)OC)c4cc(c(c(c4)Br)OC)OCC                              |
| 1462 | CCSCCOC(=O)C1[C@H](C2C(=NC1=C)C[C@H](CC2=O)c3ccc(c(c3)OC)OC)c4cc(c(c(c4)Br)OC)OC                               |
| 1463 | CC1=C([C@H]([C@H]2C(=N1)C[C@H](CC2=O)c3ccc(c(c3)OC)OC)c4cc(c(c(c4)Br)OC)OC)C(=O)OCCOC(C)C                      |
| 1464 | CCOCCOC(=O)C1[C@H](C2=C(C[C@H](CC2=O)c3ccc(c(c3)OC)OC)N=C1C)c4cc(c(c(c4)Br)OC)OCC                              |
| 1465 | CCOc1ccc(cc1)N(CC(=O)Nc2ccc(cc2)S(=O)(=O)[N-]c3ccc(cc3)Br)S(=O)(=O)c4ccc(cc4)SC                                |
| 1466 | c1ccc(cc1)C(=O)COC(=O)Cn2c(=O)c3cc4c(cc3c2=O)c(=O)n(c4=O)CC(=O)OCC(=O)c5cccc5                                  |
| 1466 | CCN(CC)CCN(c1nc2ccc(cc2s1)OCC)C(=O)c3ccc(cc3)S(=O)(=O)N(C)Cc4cccc4                                             |

|      |                                                                                                                              |
|------|------------------------------------------------------------------------------------------------------------------------------|
| 1467 | CCN(CC)CCN(c1nc2c(cccc2s1)OCC)C(=O)c3ccc(cc3)S(=O)(=O)N(C)c4cccc4                                                            |
| 1468 | CCN(CC)CCN(c1nc2c(ccc(c2s1)OC)OC)C(=O)c3ccc(cc3)S(=O)(=O)N(C)C4CCCC4                                                         |
| 1469 | CCO[P@](=O)(c1cccc1)c2cccc2OCCOCCOCCOc3cccc3[P@](=O)(c4cccc4)OCC                                                             |
| 1470 | CCO[P@@](=O)(c1cccc1)c2cccc2OCCOCCOCCOc3cccc3[P@@](=O)(c4cccc4)OCC                                                           |
| 1471 | CC(=O)OC[C@@H]1[C@H]([C@H]([C@H]([C@H]([C@H](O1)Oc2ccc3c(cc2Cl)c(cc(=O)o3)c4cccc4)OC(=O)C)OC(=O)C)OC(=O)C                    |
| 1472 | CC(=O)OC[C@H]1[C@H]([C@H]([C@H]([C@H]([C@H](O1)O[C@@]2([C@H]([C@H]([C@H]([C@H](O2)CCl)OC(=O)C)OC(=O)C)CCl)OC(=O)C)OC(=O)C)Cl |
| 1473 | CC(=O)OC[C@H]1[C@H]([C@H]([C@H]([C@H]([C@H](O1)Oc2ccc(c(c2)[O-])C(=O)COc3ccc(cc3)F)OC(=O)C)OC(=O)C)OC(=O)C                   |
| 1474 | CCCC(=O)[C@H]1C(=CC([C@H](C1=O)C(=O)OC)(C)C)N2CCN(CC2)C3=C(C(=O)[C@H](C(C3)(C)C)C(=O)OC)C(=O)CCC                             |
| 1475 | CC(=O)OC[C@H]1[C@@H]([C@H]([C@H]([C@H]([C@H](O1)SCCOc2ccc(cc2)Br)OC(=O)C)OC(=O)C)OC(=O)C                                     |
| 1476 | CCCC(=O)[C@H]1C(=CC([C@H](C1=O)C(=O)OC)(C)C)N2CCN(CC2)C3=CC([C@H](C(=O)[C@H]3C(=O)CCC)C(=O)OC)(C)C                           |
| 1477 | c1ccc(cc1)C(=O)O[C@H]2[C@@H]([C@H]([C@H]([C@H]([C@H]2OC(=O)c3cccc3)OC(=O)c4cccc4)C(=O)[O-])OC(=O)c5cccc5                     |
| 1478 | CCCN(CCC)S(=O)(=O)c1ccc(cc1)C(=O)O/N=C(\C)/c2ccc(c(c2)CSc3ccccn3)OC                                                          |
| 1479 | C(CCl)OP(=O)(OCCCl)OCC(COP(=O)(OCCCl)OCCCl)(C)Cl                                                                             |
| 1480 | CC1=C([C@@H](n2c(=O)/c(=C/c3ccc(c(c3)OC)OC(=O)C)/sc2=N1)c4ccc(c(c4)OC)OC(=O)C)C(=O)OCC(C)C                                   |
| 1481 | CCOc1cc(cc(c1OCC)OCC)C(=O)N(c2cccn2)C(=O)c3cc(c(c(c3)OCC)OCC)OCC                                                             |
| 1482 | Cc1cc(ccc1OCC=C)C(=O)C2=C(C(=O)N([C@H]2c3ccc(cc3)OCC=C)c4nc(c(s4)C(=O)OC)C)[O-]                                              |
| 1483 | CCOc1cc(cc(c1OCC)OCC)C(=O)/N=c/2\c(cc3c(n2CCOC(C)C)nc4cccn4c3=O)C#N                                                          |
| 1484 | CCOCCn\1c2c(cc/c1=N\C(=O)c3cc(c(c(c3)OCC)OCC)OCC)C(=O)OCC)c(=O)n4cccc4n2                                                     |
| 1485 | CC1([C@H](N(C(=O)N1CCCC(=O)N/N=C/c2ccc(c(c2)OC)OC)c3ccc(c3)Cl)N(C(=O)Nc4cccc(c4)Cl)[O-])C                                    |
| 1486 | CCOc1ccc2c(c1)sc(n2)N3[C@@H](C(=C(C3=O)[O-])C(=O)c4ccc5c(c4)OCCO5)c6ccc(c(c6)OCC)OCC(C)C                                     |
| 1487 | CCCCn\1c2c(cc/c1=N\C(=O)c3cc(c(c(c3)OCC)OCC)OCC)C(=O)OCC)c(=O)n4cccc(c4n2)C                                                  |
| 1488 | CCOc1cc(ccc1OCC=C)[C@@H]2C(=C(C(=O)N2c3nnc(s3)SCc4cccc4F)[O-])C(=O)c5ccc6c(c5)C[C@H](O6)C                                    |
| 1489 | CCOc1cc(ccc1OCC=C)[C@H]2C(=C(C(=O)N2c3nnc(s3)SCc4ccc(cc4)C)[O-])C(=O)c5ccc6c(c5)C[C@H](O6)C                                  |
| 1490 | CCOc1ccc2c(c1)C3=C(C(N2C(=O)c4ccc(cc4)C(C)(C)C)C)SC(=C(C35SC(=C(S5)C(=O)OC)C(=O)OC)C(=O)OC)C(=O)OC                           |
| 1491 | c1ccc(cc1)C/N=C(/[C@@H](C2=NC(N=C(O2)c3ccco3)(C(F)(F)F)C(F)(F)F)C(F)(F)F)C(F)(F)F)NC(=O)c4cccc4)[O-]                         |
| 1492 | CCn1cc(c(=O)c2c1nc(nc2)N3CCN(CC3)C(=S)Nc4c(c(c(s4)C(=O)OC(C)C)C)C(=O)OC(C)C)C(=O)[O-]                                        |
| 1493 | COc1ccc(c(c1)OC)C(=O)N(Cc2ccc(c(c2)OS(=O)(=O)c3cccc(c3)C(F)(F)F)OC)Cc4cccc4                                                  |
| 1494 | CCOCCCN(CC(=O)N(Cc1cccn1Cc2cccc2)C3CCCC3)S(=O)(=O)c4cccc5c4nccc5                                                             |
| 1495 | CCOCCCN(CC(=O)N(CCc1ccc(c(c1)OC)OC)Cc2cccs2)S(=O)(=O)c3ccc(cc3)Br                                                            |
| 1496 | CC(=O)OC[C@@H]1[C@@H]([C@@H]([C@@H]([C@@H](O1)Oc2ccc3c(cc(=O)oc3c2)c4cccc4)OC(=O)C)OC(=O)C)OC(=O)C                           |
| 1497 | CCCCOc1ccc(cc1)C(=O)C2=C(C(=O)N([C@H]2c3cc(c(c(c3)OC)OC)OC)c4nnc(s4)SCc5cccc5Cl)[O-]                                         |
| 1498 | CCOc1cc(ccc1OC(=O)c2ccc(cc2)OC)/C=N/NC(=O)c3ccc(cc3)[N-]S(=O)(=O)c4ccc(cc4)C                                                 |
| 1499 | CCOc1ccc(cc1)C(=O)Oc2ccc(cc2OC)/C=N/NC(=O)c3ccc(cc3)[N-]S(=O)(=O)c4ccc(cc4)Cl                                                |
| 1500 | CCN(CC)c1ccc(cc1)/C=c/2\c(=O)n3c(=NC(=C([C@H]3c4ccc(c(c4)OC)OC(=O)C)C(=O)OCC(C)C)C)s2                                        |
| 1500 | CC1(CN=C(S1)N2CC[NH+](CC2)C[C@H](COc3ccc(cc3)OC[C@H](C[NH+]4CCN(CC4)C5=NCC(S5)(C)C)O)O)C                                     |
